# Supplementary material for: Transcriptome Analysis of Epithelial and Stromal Contributions to Mammogenesis in Three Week Prepartum Cows
Source: PLoS One. 2011 Jul 29;6(7):e22541. doi: 10.1371/journal.pone.0022541 (PMC3146472; doi:10.1371/journal.pone.0022541)
Supplement: Supplemental Information S1 — Worskeets A–Q. Lists the category of gene set (e.g. CC = cellular location; BP = Biological process; MF = molecular function); term (i.e. specific gene ontology (GO) with GO number); count (no. of genes enriching term); % (percent of total of genes that belong to category enriched by analyzed gene set); P-value (i.e. enrichment of gene set); genes (list of genes enriching gene set by Affymetrix ID); Bonferroni; Benjamini and FDR (false discovery rate) for functional annotation clustering of genes expressed at a greater level in A) epithelium and B) stromal tissue. Symbol, Entrez Gene Name, Affymetrix ID, Fold Change, P-value and False Discovery Rate are listed for C) Genes in IPA generated epithelial network 1; D) Genes in IPA generated epithelial network 2; E) Genes in IPA generated epithelial network 3; F) Genes in IPA generated epithelial network 4; G) Genes in IPA generated epithelial network 5; H) Genes in IPA generated stromal network 1; I) Genes in IPA generated stromal network 2; J) Genes in IPA generated stromal network 3; K) Genes in IPA generated stromal network 4; L) Genes in IPA generated stromal network 5; M) Gene enrichment of Hepatic Fibrosis/Hepatic Stellate Cell Activation Canonical Pathway; N) Genes clustered in IGF canonical pathway; O) Gene enrichment of VEGF signaling canonical pathway. P) Genes in Figure 4; Q) Receptors expressed at a greater level in epithelial or stromal tissue in three week prepartum dry cows. (XLS) [file pone.0022541.s005.xls]

## Sheet: A
Worksheet A. Functional annotation clustering of genes expressed at a greater level in epithelial tissue
Functional Group 1	Median: 4.204559254268713E-29	Geo: 1.1508480198038236E-25	Bt.22322.1.S1_at, Bt.23191.1.S1_at, Bt.11339.1.S1_at, Bt.9657.1.S1_at, Bt.9797.1.S1_at, Bt.77.1.S1_at, Bt.26836.2.A1_at, Bt.21875.1.S1_at, Bt.59.1.S1_at, Bt.23172.2.S1_at, Bt.3080.1.S1_a_at, Bt.23372.1.S1_a_at, Bt.8706.1.S1_at, Bt.12896.1.S1_at, Bt.16108.1.A1_at, Bt.24931.1.A1_at, Bt.10880.1.S1_at, Bt.23179.1.S1_at, Bt.23179.1.S2_at, Bt.5024.1.S1_at, Bt.19709.1.S1_at, Bt.12559.1.S1_at, Bt.5131.1.…
Category	Term	Count	%	PValue	Genes	Bonferroni	Benjamini	FDR
GOTERM_CC_ALL	GO:0005737~cytoplasm	332	0.3803	6.96264e-60	Bt.22322.1.S1_at, Bt.23191.1.S1_at, Bt.11339.1.S1_at, Bt.9657.1.S1_at, Bt.9797.1.S1_at, Bt.77.1.S1_at, Bt.26836.2.A1_at, Bt.21875.1.S1_at, Bt.59.1.S1_at, Bt.23172.2.S1_at, Bt.3080.1.S1_a_at, Bt.23372.1.S1_a_at, Bt.8706.1.S1_at, Bt.12896.1.S1_at, Bt.16108.1.A1_at, Bt.24931.1.A1_at, Bt.10880.1.S1_at, Bt.23179.1.S1_at, Bt.23179.1.S2_at, Bt.5024.1.S1_at, Bt.19709.1.S1_at, Bt.12559.1.S1_at, Bt.5131.1.…	3.89908e-57	3.89908e-57	1.01862e-56
GOTERM_CC_ALL	GO:0044444~cytoplasmic part	240	0.2749	1.69929e-45	Bt.11339.1.S1_at, Bt.22322.1.S1_at, Bt.23191.1.S1_at, Bt.9797.1.S1_at, Bt.77.1.S1_at, Bt.26836.2.A1_at, Bt.21875.1.S1_at, Bt.59.1.S1_at, Bt.23172.2.S1_at, Bt.3080.1.S1_a_at, Bt.23372.1.S1_a_at, Bt.16108.1.A1_at, Bt.24931.1.A1_at, Bt.10880.1.S1_at, Bt.23179.1.S1_at, Bt.23179.1.S2_at, Bt.19709.1.S1_at, Bt.5131.1.S1_at, Bt.5400.1.S1_at, Bt.4637.1.A1_a_at, Bt.2723.1.A1_at, Bt.5510.1.S1_at, Bt.3288.1.…	9.51602e-43	4.75801e-43	2.48602e-42
GOTERM_CC_ALL	GO:0044424~intracellular part	404	0.4628	1.8346e-44	Bt.9657.1.S1_at, Bt.11339.1.S1_at, Bt.9797.1.S1_at, Bt.77.1.S1_at, Bt.3080.1.S1_a_at, Bt.24931.1.A1_at, Bt.10880.1.S1_at, Bt.5024.1.S1_at, Bt.19709.1.S1_at, Bt.15267.1.A1_at, Bt.4637.1.A1_a_at, Bt.2723.1.A1_at, Bt.5510.1.S1_at, Bt.1338.1.A1_at, Bt.2822.1.S1_at, Bt.21491.1.S1_at, Bt.21918.2.S1_at, Bt.13553.2.S1_a_at, Bt.13553.1.S1_at, Bt.15993.1.S1_s_at, Bt.3005.1.S1_at, Bt.20227.1.S1_at, Bt.4823.…	1.02737e-41	3.42458e-42	2.68397e-41
GOTERM_CC_ALL	GO:0005622~intracellular	416	0.4765	6.55891e-32	Bt.9657.1.S1_at, Bt.11339.1.S1_at, Bt.9797.1.S1_at, Bt.77.1.S1_at, Bt.3080.1.S1_a_at, Bt.24931.1.A1_at, Bt.10880.1.S1_at, Bt.5024.1.S1_at, Bt.19709.1.S1_at, Bt.15267.1.A1_at, Bt.6404.1.S1_at, Bt.4637.1.A1_a_at, Bt.2723.1.A1_at, Bt.5510.1.S1_at, Bt.1338.1.A1_at, Bt.2822.1.S1_at, Bt.21491.1.S1_at, Bt.21918.2.S1_at, Bt.13553.2.S1_a_at, Bt.13553.1.S1_at, Bt.15993.1.S1_s_at, Bt.4606.1.S1_at, Bt.24522.…	3.67299e-29	9.18248e-30	9.59553e-29
GOTERM_CC_ALL	GO:0043229~intracellular organelle	334	0.3826	4.20456e-29	Bt.22322.1.S1_at, Bt.23191.1.S1_at, Bt.11339.1.S1_at, Bt.9657.1.S1_at, Bt.9797.1.S1_at, Bt.77.1.S1_at, Bt.26836.2.A1_at, Bt.59.1.S1_at, Bt.23172.2.S1_at, Bt.3080.1.S1_a_at, Bt.23372.1.S1_a_at, Bt.8706.1.S1_at, Bt.16108.1.A1_at, Bt.24931.1.A1_at, Bt.10880.1.S1_at, Bt.23179.1.S1_at, Bt.23179.1.S2_at, Bt.19709.1.S1_at, Bt.15267.1.A1_at, Bt.5131.1.S1_at, Bt.5400.1.S1_at, Bt.4637.1.A1_a_at, Bt.5510.1.…	2.35455e-26	4.70911e-27	6.15116e-26
GOTERM_CC_ALL	GO:0043226~organelle	334	0.3826	4.20456e-29	Bt.22322.1.S1_at, Bt.23191.1.S1_at, Bt.11339.1.S1_at, Bt.9657.1.S1_at, Bt.9797.1.S1_at, Bt.77.1.S1_at, Bt.26836.2.A1_at, Bt.59.1.S1_at, Bt.23172.2.S1_at, Bt.3080.1.S1_a_at, Bt.23372.1.S1_a_at, Bt.8706.1.S1_at, Bt.16108.1.A1_at, Bt.24931.1.A1_at, Bt.10880.1.S1_at, Bt.23179.1.S1_at, Bt.23179.1.S2_at, Bt.19709.1.S1_at, Bt.15267.1.A1_at, Bt.5131.1.S1_at, Bt.5400.1.S1_at, Bt.4637.1.A1_a_at, Bt.5510.1.…	2.35455e-26	4.70911e-27	6.15116e-26
GOTERM_CC_ALL	GO:0043231~intracellular membrane-bound organelle	265	0.3036	2.08773e-15	Bt.11339.1.S1_at, Bt.9657.1.S1_at, Bt.9797.1.S1_at, Bt.77.1.S1_at, Bt.26836.2.A1_at, Bt.59.1.S1_at, Bt.3080.1.S1_a_at, Bt.8706.1.S1_at, Bt.16108.1.A1_at, Bt.24931.1.A1_at, Bt.10880.1.S1_at, Bt.23179.1.S1_at, Bt.23179.1.S2_at, Bt.19709.1.S1_at, Bt.15267.1.A1_at, Bt.5131.1.S1_at, Bt.5400.1.S1_at, Bt.4637.1.A1_a_at, Bt.5510.1.S1_at, Bt.1338.1.A1_at, Bt.3288.1.A1_at, Bt.621.1.S1_at, Bt.2136.1.S1_at, …	1.18128e-12	1.31228e-13	3.08642e-12
GOTERM_CC_ALL	GO:0043227~membrane-bound organelle	265	0.3036	2.15086e-15	Bt.11339.1.S1_at, Bt.9657.1.S1_at, Bt.9797.1.S1_at, Bt.77.1.S1_at, Bt.26836.2.A1_at, Bt.59.1.S1_at, Bt.3080.1.S1_a_at, Bt.8706.1.S1_at, Bt.16108.1.A1_at, Bt.24931.1.A1_at, Bt.10880.1.S1_at, Bt.23179.1.S1_at, Bt.23179.1.S2_at, Bt.19709.1.S1_at, Bt.15267.1.A1_at, Bt.5131.1.S1_at, Bt.5400.1.S1_at, Bt.4637.1.A1_a_at, Bt.5510.1.S1_at, Bt.1338.1.A1_at, Bt.3288.1.A1_at, Bt.621.1.S1_at, Bt.2136.1.S1_at, …	1.18128e-12	1.18128e-13	3.08642e-12
GOTERM_CC_ALL	GO:0005623~cell	492	0.5636	0.000139908	Bt.5609.3.A1_a_at, Bt.5609.1.A1_a_at, Bt.9657.1.S1_at, Bt.11339.1.S1_at, Bt.9797.1.S1_at, Bt.77.1.S1_at, Bt.15698.1.S1_at, Bt.4557.1.S1_at, Bt.5369.1.S1_at, Bt.13349.1.S1_at, Bt.3080.1.S1_a_at, Bt.24931.1.A1_at, Bt.10880.1.S1_at, Bt.5024.1.S1_at, Bt.19709.1.S1_at, Bt.15267.1.A1_at, Bt.6404.1.S1_at, Bt.4637.1.A1_a_at, Bt.2723.1.A1_at, Bt.5510.1.S1_at, Bt.1338.1.A1_at, Bt.2822.1.S1_at, Bt.21491.1.S…	0.0753631	0.00223619	0.204487
GOTERM_CC_ALL	GO:0044464~cell part	492	0.5636	0.000139908	Bt.5609.3.A1_a_at, Bt.5609.1.A1_a_at, Bt.9657.1.S1_at, Bt.11339.1.S1_at, Bt.9797.1.S1_at, Bt.77.1.S1_at, Bt.15698.1.S1_at, Bt.4557.1.S1_at, Bt.5369.1.S1_at, Bt.13349.1.S1_at, Bt.3080.1.S1_a_at, Bt.24931.1.A1_at, Bt.10880.1.S1_at, Bt.5024.1.S1_at, Bt.19709.1.S1_at, Bt.15267.1.A1_at, Bt.6404.1.S1_at, Bt.4637.1.A1_a_at, Bt.2723.1.A1_at, Bt.5510.1.S1_at, Bt.1338.1.A1_at, Bt.2822.1.S1_at, Bt.21491.1.S…	0.0753631	0.00223619	0.204487
GOTERM_CC_ALL	GO:0005634~nucleus	127	0.1455	0.0212016	Bt.12429.1.S1_at, Bt.9657.1.S1_at, Bt.13220.1.S1_at, Bt.23170.1.S1_at, Bt.8306.1.S1_at, Bt.4791.1.S1_at, Bt.8706.1.S1_at, Bt.10880.1.S1_at, Bt.19709.1.S1_at, Bt.24017.1.A1_s_at, Bt.4756.1.S1_at, Bt.15267.1.A1_at, Bt.5197.2.S1_at, Bt.4150.1.S1_at, Bt.29462.1.S1_at, Bt.2534.2.S1_at, Bt.26339.1.A1_at, Bt.10299.1.S1_at, Bt.1338.1.A1_at, Bt.13036.1.S1_at, Bt.886.1.S1_at, Bt.2136.1.S1_at, Bt.18533.1.S1…	0.999994	0.166254	26.9123
Functional Group 2	Median: 5.782829378322668E-21	Geo: 1.7484406407567013E-19	Bt.1990.1.S1_at, Bt.9657.1.S1_at, Bt.442.1.S1_at, Bt.22322.1.S1_at, Bt.23191.1.S1_at, Bt.11465.1.S1_at, Bt.15530.1.S1_at, Bt.4557.1.S1_at, Bt.7194.1.S1_at, Bt.26836.2.A1_at, Bt.3050.1.S1_at, Bt.23172.2.S1_at, Bt.404.1.S1_at, Bt.4540.1.S1_at, Bt.7641.2.S1_a_at, Bt.7641.1.S1_at, Bt.2934.1.S1_at, Bt.5348.1.S2_at, Bt.15878.1.S1_at, Bt.15851.1.S1_at, Bt.23526.1.S1_at, Bt.23372.1.S1_a_at, Bt.22772.1.S1…
Category	Term	Count	%	PValue	Genes	Bonferroni	Benjamini	FDR
GOTERM_BP_ALL	GO:0009058~biosynthetic process	140	0.1604	9.39511e-30	Bt.1990.1.S1_at, Bt.9657.1.S1_at, Bt.442.1.S1_at, Bt.22322.1.S1_at, Bt.23191.1.S1_at, Bt.11465.1.S1_at, Bt.15530.1.S1_at, Bt.4557.1.S1_at, Bt.7194.1.S1_at, Bt.26836.2.A1_at, Bt.3050.1.S1_at, Bt.23172.2.S1_at, Bt.404.1.S1_at, Bt.4540.1.S1_at, Bt.7641.2.S1_a_at, Bt.7641.1.S1_at, Bt.2934.1.S1_at, Bt.5348.1.S2_at, Bt.15878.1.S1_at, Bt.15851.1.S1_at, Bt.23526.1.S1_at, Bt.23372.1.S1_a_at, Bt.22772.1.S1…	3.12857e-26	3.12857e-26	1.71141e-26
GOTERM_BP_ALL	GO:0006412~translation	86	0.0985	2.31988e-28	Bt.13608.1.A1_at, Bt.23001.1.S1_a_at, Bt.1874.1.S1_at, Bt.22322.1.S1_at, Bt.23191.1.S1_at, Bt.1269.1.S1_a_at, Bt.1269.2.A1_at, Bt.15530.1.S1_at, Bt.7323.1.S1_at, Bt.23339.1.S1_at, Bt.7052.1.S1_at, Bt.15384.1.S1_at, Bt.2623.1.S1_at, Bt.3050.1.S1_at, Bt.23172.2.S1_at, Bt.7781.1.S1_at, Bt.2934.1.S1_at, Bt.5348.1.S2_at, Bt.15878.1.S1_at, Bt.15851.1.S1_at, Bt.23372.1.S1_a_at, Bt.23526.1.S1_at, Bt.4832…	7.72521e-25	3.86261e-25	4.2259e-25
GOTERM_BP_ALL	GO:0044249~cellular biosynthetic process	118	0.1352	1.82647e-27	Bt.1990.1.S1_at, Bt.9657.1.S1_at, Bt.442.1.S1_at, Bt.22322.1.S1_at, Bt.23191.1.S1_at, Bt.15530.1.S1_at, Bt.7194.1.S1_at, Bt.26836.2.A1_at, Bt.3050.1.S1_at, Bt.23172.2.S1_at, Bt.404.1.S1_at, Bt.4540.1.S1_at, Bt.7641.2.S1_a_at, Bt.7641.1.S1_at, Bt.2934.1.S1_at, Bt.5348.1.S2_at, Bt.15878.1.S1_at, Bt.15851.1.S1_at, Bt.23526.1.S1_at, Bt.23372.1.S1_a_at, Bt.22772.1.S1_at, Bt.5466.2.S1_a_at, Bt.23179.1.…	6.08216e-24	2.02739e-24	3.3271e-24
GOTERM_MF_ALL	GO:0003735~structural constituent of ribosome	58	0.0664	6.27508e-25	Bt.13608.1.A1_at, Bt.23001.1.S1_a_at, Bt.1874.1.S1_at, Bt.22322.1.S1_at, Bt.23191.1.S1_at, Bt.1269.1.S1_a_at, Bt.1269.2.A1_at, Bt.15530.1.S1_at, Bt.23339.1.S1_at, Bt.7052.1.S1_at, Bt.15384.1.S1_at, Bt.2623.1.S1_at, Bt.23172.2.S1_at, Bt.7781.1.S1_at, Bt.2934.1.S1_at, Bt.5348.1.S2_at, Bt.15878.1.S1_at, Bt.23526.1.S1_at, Bt.23372.1.S1_a_at, Bt.4832.1.S1_at, Bt.22772.1.S1_at, Bt.8125.1.S1_a_at, Bt.21…	1.16089e-21	1.16089e-21	1.06906e-21
GOTERM_BP_ALL	GO:0009059~macromolecule biosynthetic process	92	0.1054	9.41577e-24	Bt.13608.1.A1_at, Bt.23001.1.S1_a_at, Bt.1874.1.S1_at, Bt.22322.1.S1_at, Bt.23191.1.S1_at, Bt.1269.1.S1_a_at, Bt.1269.2.A1_at, Bt.869.1.S1_at, Bt.15530.1.S1_at, Bt.7323.1.S1_at, Bt.4557.1.S1_at, Bt.23339.1.S1_at, Bt.7052.1.S1_at, Bt.15384.1.S1_at, Bt.2623.1.S1_at, Bt.3050.1.S1_at, Bt.23172.2.S1_at, Bt.7781.1.S1_at, Bt.2934.1.S1_at, Bt.5348.1.S2_at, Bt.15878.1.S1_at, Bt.15851.1.S1_at, Bt.23372.1.S…	3.13545e-20	7.83863e-21	1.71518e-20
GOTERM_CC_ALL	GO:0005840~ribosome	60	0.0687	3.26538e-23	Bt.13608.1.A1_at, Bt.23001.1.S1_a_at, Bt.1874.1.S1_at, Bt.22322.1.S1_at, Bt.23191.1.S1_at, Bt.1269.1.S1_a_at, Bt.1269.2.A1_at, Bt.15530.1.S1_at, Bt.23339.1.S1_at, Bt.7052.1.S1_at, Bt.15384.1.S1_at, Bt.2623.1.S1_at, Bt.23172.2.S1_at, Bt.7781.1.S1_at, Bt.2934.1.S1_at, Bt.5348.1.S2_at, Bt.15878.1.S1_at, Bt.23526.1.S1_at, Bt.23372.1.S1_a_at, Bt.4832.1.S1_at, Bt.22772.1.S1_at, Bt.8125.1.S1_a_at, Bt.21…	1.82861e-20	2.6123e-21	4.77717e-20
GOTERM_CC_ALL	GO:0030529~ribonucleoprotein complex	77	0.0882	6.9022e-23	Bt.13608.1.A1_at, Bt.23001.1.S1_a_at, Bt.1874.1.S1_at, Bt.11339.1.S1_at, Bt.22322.1.S1_at, Bt.23191.1.S1_at, Bt.1269.1.S1_a_at, Bt.1269.2.A1_at, Bt.15530.1.S1_at, Bt.23170.1.S1_at, Bt.21871.1.S1_a_at, Bt.9051.1.S1_at, Bt.21070.1.S1_at, Bt.23339.1.S1_at, Bt.7052.1.S1_at, Bt.15384.1.S1_at, Bt.2623.1.S1_at, Bt.23172.2.S1_at, Bt.7781.1.S1_at, Bt.2934.1.S1_at, Bt.5348.1.S2_at, Bt.15878.1.S1_at, Bt.235…	3.86523e-20	4.83154e-21	1.00978e-19
SP_PIR_KEYWORDS	ribosomal protein	57	0.0653	1.03975e-22	Bt.13608.1.A1_at, Bt.23001.1.S1_a_at, Bt.1874.1.S1_at, Bt.22322.1.S1_at, Bt.23191.1.S1_at, Bt.1269.1.S1_a_at, Bt.1269.2.A1_at, Bt.15530.1.S1_at, Bt.21070.1.S1_at, Bt.23339.1.S1_at, Bt.7052.1.S1_at, Bt.15384.1.S1_at, Bt.2623.1.S1_at, Bt.23172.2.S1_at, Bt.7781.1.S1_at, Bt.2934.1.S1_at, Bt.5348.1.S2_at, Bt.15878.1.S1_at, Bt.23372.1.S1_a_at, Bt.4832.1.S1_at, Bt.22772.1.S1_at, Bt.8125.1.S1_a_at, Bt.21…	7.64219e-20	7.64219e-20	1.57825e-19
SP_PIR_KEYWORDS	ribonucleoprotein	58	0.0664	1.14617e-20	Bt.13608.1.A1_at, Bt.23001.1.S1_a_at, Bt.1874.1.S1_at, Bt.22322.1.S1_at, Bt.23191.1.S1_at, Bt.1269.1.S1_a_at, Bt.1269.2.A1_at, Bt.15530.1.S1_at, Bt.23170.1.S1_at, Bt.9051.1.S1_at, Bt.21070.1.S1_at, Bt.23339.1.S1_at, Bt.7052.1.S1_at, Bt.15384.1.S1_at, Bt.2623.1.S1_at, Bt.23172.2.S1_at, Bt.7781.1.S1_at, Bt.2934.1.S1_at, Bt.5348.1.S2_at, Bt.15878.1.S1_at, Bt.23372.1.S1_a_at, Bt.4832.1.S1_at, Bt.2277…	8.42434e-18	4.21217e-18	1.73978e-17
KEGG_PATHWAY	bta03010:Ribosome	31	0.0355	3.16483e-19	Bt.15436.2.S1_a_at, Bt.15436.1.S1_s_at, Bt.1269.1.S1_a_at, Bt.1269.2.A1_at, Bt.15993.1.S1_s_at, Bt.15530.1.S1_at, Bt.3779.1.S1_at, Bt.5507.1.S1_at, Bt.22568.1.S1_at, Bt.4012.1.S1_at, Bt.5245.2.A1_at, Bt.5245.2.S1_a_at, Bt.5334.1.S1_at, Bt.7781.1.S1_at, Bt.2934.1.S1_at, Bt.22772.1.S1_at, Bt.12831.1.S1_at, Bt.8125.1.S1_a_at, Bt.21118.1.S1_at, Bt.12911.1.S1_at, Bt.5466.2.S1_a_at, Bt.9814.1.S1_at, Bt…	5.85493e-17	5.85493e-17	3.9161e-16
GOTERM_MF_ALL	GO:0005198~structural molecule activity	72	0.0825	4.3117e-17	Bt.13608.1.A1_at, Bt.23001.1.S1_a_at, Bt.1874.1.S1_at, Bt.22322.1.S1_at, Bt.23191.1.S1_at, Bt.1269.1.S1_a_at, Bt.1269.2.A1_at, Bt.15530.1.S1_at, Bt.7886.1.S1_at, Bt.23339.1.S1_at, Bt.7052.1.S1_at, Bt.15384.1.S1_at, Bt.2623.1.S1_at, Bt.3210.1.S1_at, Bt.23172.2.S1_at, Bt.20230.1.S1_at, Bt.222.1.S1_at, Bt.7781.1.S1_at, Bt.2934.1.S1_at, Bt.5348.1.S2_at, Bt.15878.1.S1_at, Bt.24343.1.A1_at, Bt.23526.1.…	7.97664e-14	3.98832e-14	7.3457e-14
GOTERM_BP_ALL	GO:0044267~cellular protein metabolic process	189	0.2165	8.50813e-14	Bt.22322.1.S1_at, Bt.23191.1.S1_at, Bt.15530.1.S1_at, Bt.9797.1.S1_at, Bt.20275.1.S1_at, Bt.4557.1.S1_at, Bt.22359.3.S1_at, Bt.3050.1.S1_at, Bt.23172.2.S1_at, Bt.5397.1.S1_at, Bt.2934.1.S1_at, Bt.5348.1.S2_at, Bt.15878.1.S1_at, Bt.15851.1.S1_at, Bt.3080.1.S1_a_at, Bt.28515.1.A1_at, Bt.29857.1.A1_at, Bt.29857.1.S1_at, Bt.23372.1.S1_a_at, Bt.8706.1.S1_at, Bt.23526.1.S1_at, Bt.22772.1.S1_at, Bt.1088…	2.83193e-10	3.53991e-11	1.54909e-10
GOTERM_CC_ALL	GO:0032991~macromolecular complex	144	0.1649	2.04864e-12	Bt.1990.1.S1_at, Bt.22322.1.S1_at, Bt.23191.1.S1_at, Bt.11339.1.S1_at, Bt.442.1.S1_at, Bt.15530.1.S1_at, Bt.13220.1.S1_at, Bt.23170.1.S1_at, Bt.21871.1.S1_a_at, Bt.7194.1.S1_at, Bt.117.1.S1_at, Bt.3050.1.S1_at, Bt.23172.2.S1_at, Bt.404.1.S1_at, Bt.4540.1.S1_at, Bt.2934.1.S1_at, Bt.5348.1.S2_at, Bt.15878.1.S1_at, Bt.23372.1.S1_a_at, Bt.23526.1.S1_at, Bt.22772.1.S1_at, Bt.10880.1.S1_at, Bt.5466.2.S…	1.14721e-09	9.56005e-11	2.99702e-09
GOTERM_BP_ALL	GO:0010467~gene expression	146	0.1672	5.24301e-10	Bt.4748.1.S1_at, Bt.12429.1.S1_at, Bt.22322.1.S1_at, Bt.23191.1.S1_at, Bt.15530.1.S1_at, Bt.13220.1.S1_at, Bt.23170.1.S1_at, Bt.8306.1.S1_at, Bt.3050.1.S1_at, Bt.23172.2.S1_at, Bt.4791.1.S1_at, Bt.2934.1.S1_at, Bt.5348.1.S2_at, Bt.15878.1.S1_at, Bt.15851.1.S1_at, Bt.23526.1.S1_at, Bt.23372.1.S1_a_at, Bt.22772.1.S1_at, Bt.19676.2.S1_a_at, Bt.5466.2.S1_a_at, Bt.19709.1.S1_at, Bt.15267.1.A1_at, Bt.2…	1.74592e-06	1.5872e-07	9.55066e-07
GOTERM_CC_ALL	GO:0043228~non-membrane-bound organelle	93	0.1065	9.83987e-08	Bt.13608.1.A1_at, Bt.23001.1.S1_a_at, Bt.1874.1.S1_at, Bt.22322.1.S1_at, Bt.23191.1.S1_at, Bt.1269.1.S1_a_at, Bt.1269.2.A1_at, Bt.15530.1.S1_at, Bt.20275.1.S1_at, Bt.23339.1.S1_at, Bt.7052.1.S1_at, Bt.15384.1.S1_at, Bt.2623.1.S1_at, Bt.3210.1.S1_at, Bt.23172.2.S1_at, Bt.20230.1.S1_at, Bt.7781.1.S1_at, Bt.28037.1.S1_at, Bt.2934.1.S1_at, Bt.5348.1.S2_at, Bt.15878.1.S1_at, Bt.28064.2.S1_at, Bt.9929.…	5.51018e-05	2.20413e-06	0.000143955
GOTERM_CC_ALL	GO:0043232~intracellular non-membrane-bound organelle	93	0.1065	9.83987e-08	Bt.13608.1.A1_at, Bt.23001.1.S1_a_at, Bt.1874.1.S1_at, Bt.22322.1.S1_at, Bt.23191.1.S1_at, Bt.1269.1.S1_a_at, Bt.1269.2.A1_at, Bt.15530.1.S1_at, Bt.20275.1.S1_at, Bt.23339.1.S1_at, Bt.7052.1.S1_at, Bt.15384.1.S1_at, Bt.2623.1.S1_at, Bt.3210.1.S1_at, Bt.23172.2.S1_at, Bt.20230.1.S1_at, Bt.7781.1.S1_at, Bt.28037.1.S1_at, Bt.2934.1.S1_at, Bt.5348.1.S2_at, Bt.15878.1.S1_at, Bt.28064.2.S1_at, Bt.9929.…	5.51018e-05	2.20413e-06	0.000143955
Functional Group 3	Median: 6.646192105038296E-15	Geo: 1.177201606096484E-18	Bt.9657.1.S1_at, Bt.11339.1.S1_at, Bt.9797.1.S1_at, Bt.77.1.S1_at, Bt.3080.1.S1_a_at, Bt.24931.1.A1_at, Bt.10880.1.S1_at, Bt.5024.1.S1_at, Bt.19709.1.S1_at, Bt.15267.1.A1_at, Bt.4637.1.A1_a_at, Bt.2723.1.A1_at, Bt.5510.1.S1_at, Bt.1338.1.A1_at, Bt.2822.1.S1_at, Bt.21491.1.S1_at, Bt.21918.2.S1_at, Bt.13553.2.S1_a_at, Bt.13553.1.S1_at, Bt.15993.1.S1_s_at, Bt.3005.1.S1_at, Bt.20227.1.S1_at, Bt.4823.…
Category	Term	Count	%	PValue	Genes	Bonferroni	Benjamini	FDR
GOTERM_CC_ALL	GO:0044424~intracellular part	404	0.4628	1.8346e-44	Bt.9657.1.S1_at, Bt.11339.1.S1_at, Bt.9797.1.S1_at, Bt.77.1.S1_at, Bt.3080.1.S1_a_at, Bt.24931.1.A1_at, Bt.10880.1.S1_at, Bt.5024.1.S1_at, Bt.19709.1.S1_at, Bt.15267.1.A1_at, Bt.4637.1.A1_a_at, Bt.2723.1.A1_at, Bt.5510.1.S1_at, Bt.1338.1.A1_at, Bt.2822.1.S1_at, Bt.21491.1.S1_at, Bt.21918.2.S1_at, Bt.13553.2.S1_a_at, Bt.13553.1.S1_at, Bt.15993.1.S1_s_at, Bt.3005.1.S1_at, Bt.20227.1.S1_at, Bt.4823.…	1.02737e-41	3.42458e-42	2.68397e-41
GOTERM_CC_ALL	GO:0005622~intracellular	416	0.4765	6.55891e-32	Bt.9657.1.S1_at, Bt.11339.1.S1_at, Bt.9797.1.S1_at, Bt.77.1.S1_at, Bt.3080.1.S1_a_at, Bt.24931.1.A1_at, Bt.10880.1.S1_at, Bt.5024.1.S1_at, Bt.19709.1.S1_at, Bt.15267.1.A1_at, Bt.6404.1.S1_at, Bt.4637.1.A1_a_at, Bt.2723.1.A1_at, Bt.5510.1.S1_at, Bt.1338.1.A1_at, Bt.2822.1.S1_at, Bt.21491.1.S1_at, Bt.21918.2.S1_at, Bt.13553.2.S1_a_at, Bt.13553.1.S1_at, Bt.15993.1.S1_s_at, Bt.4606.1.S1_at, Bt.24522.…	3.67299e-29	9.18248e-30	9.59553e-29
GOTERM_BP_ALL	GO:0006412~translation	86	0.0985	2.31988e-28	Bt.13608.1.A1_at, Bt.23001.1.S1_a_at, Bt.1874.1.S1_at, Bt.22322.1.S1_at, Bt.23191.1.S1_at, Bt.1269.1.S1_a_at, Bt.1269.2.A1_at, Bt.15530.1.S1_at, Bt.7323.1.S1_at, Bt.23339.1.S1_at, Bt.7052.1.S1_at, Bt.15384.1.S1_at, Bt.2623.1.S1_at, Bt.3050.1.S1_at, Bt.23172.2.S1_at, Bt.7781.1.S1_at, Bt.2934.1.S1_at, Bt.5348.1.S2_at, Bt.15878.1.S1_at, Bt.15851.1.S1_at, Bt.23372.1.S1_a_at, Bt.23526.1.S1_at, Bt.4832…	7.72521e-25	3.86261e-25	4.2259e-25
GOTERM_BP_ALL	GO:0009059~macromolecule biosynthetic process	92	0.1054	9.41577e-24	Bt.13608.1.A1_at, Bt.23001.1.S1_a_at, Bt.1874.1.S1_at, Bt.22322.1.S1_at, Bt.23191.1.S1_at, Bt.1269.1.S1_a_at, Bt.1269.2.A1_at, Bt.869.1.S1_at, Bt.15530.1.S1_at, Bt.7323.1.S1_at, Bt.4557.1.S1_at, Bt.23339.1.S1_at, Bt.7052.1.S1_at, Bt.15384.1.S1_at, Bt.2623.1.S1_at, Bt.3050.1.S1_at, Bt.23172.2.S1_at, Bt.7781.1.S1_at, Bt.2934.1.S1_at, Bt.5348.1.S2_at, Bt.15878.1.S1_at, Bt.15851.1.S1_at, Bt.23372.1.S…	3.13545e-20	7.83863e-21	1.71518e-20
GOTERM_BP_ALL	GO:0019538~protein metabolic process	201	0.2302	7.29311e-16	Bt.22322.1.S1_at, Bt.23191.1.S1_at, Bt.9797.1.S1_at, Bt.4557.1.S1_at, Bt.23172.2.S1_at, Bt.3080.1.S1_a_at, Bt.8706.1.S1_at, Bt.23372.1.S1_a_at, Bt.10880.1.S1_at, Bt.5024.1.S1_at, Bt.23179.1.S1_at, Bt.23179.1.S2_at, Bt.234.1.S1_at, Bt.26817.2.S1_at, Bt.4680.1.S1_at, Bt.621.1.S1_at, Bt.2136.1.S1_at, Bt.5495.1.S1_at, Bt.2822.1.S1_at, Bt.1226.1.S1_a_at, Bt.2131.1.S1_at, Bt.4834.1.S1_at, Bt.21918.2.S1…	2.58793e-12	5.17586e-13	1.42109e-12
GOTERM_BP_ALL	GO:0008152~metabolic process	377	0.4318	6.03984e-15	Bt.22322.1.S1_at, Bt.23191.1.S1_at, Bt.9657.1.S1_at, Bt.9797.1.S1_at, Bt.27130.1.S1_at, Bt.77.1.S1_at, Bt.4557.1.S1_at, Bt.26836.2.A1_at, Bt.21875.1.S1_at, Bt.23172.2.S1_at, Bt.3080.1.S1_a_at, Bt.23372.1.S1_a_at, Bt.8706.1.S1_at, Bt.20584.1.S1_at, Bt.10880.1.S1_at, Bt.23179.1.S1_at, Bt.23179.1.S2_at, Bt.5024.1.S1_at, Bt.19709.1.S1_at, Bt.12559.1.S1_at, Bt.15267.1.A1_at, Bt.5131.1.S1_at, Bt.234.1.…	1.9964e-11	3.32734e-12	1.09246e-11
GOTERM_BP_ALL	GO:0044260~cellular macromolecule metabolic process	194	0.2222	7.25255e-15	Bt.22322.1.S1_at, Bt.23191.1.S1_at, Bt.9797.1.S1_at, Bt.4557.1.S1_at, Bt.23172.2.S1_at, Bt.3080.1.S1_a_at, Bt.8706.1.S1_at, Bt.23372.1.S1_a_at, Bt.10880.1.S1_at, Bt.5024.1.S1_at, Bt.23179.1.S1_at, Bt.23179.1.S2_at, Bt.5131.1.S1_at, Bt.234.1.S1_at, Bt.26817.2.S1_at, Bt.4680.1.S1_at, Bt.621.1.S1_at, Bt.2136.1.S1_at, Bt.5495.1.S1_at, Bt.2822.1.S1_at, Bt.1226.1.S1_a_at, Bt.2131.1.S1_at, Bt.4834.1.S1_…	2.40308e-11	3.43292e-12	1.3145e-11
GOTERM_BP_ALL	GO:0044267~cellular protein metabolic process	189	0.2165	8.50813e-14	Bt.22322.1.S1_at, Bt.23191.1.S1_at, Bt.15530.1.S1_at, Bt.9797.1.S1_at, Bt.20275.1.S1_at, Bt.4557.1.S1_at, Bt.22359.3.S1_at, Bt.3050.1.S1_at, Bt.23172.2.S1_at, Bt.5397.1.S1_at, Bt.2934.1.S1_at, Bt.5348.1.S2_at, Bt.15878.1.S1_at, Bt.15851.1.S1_at, Bt.3080.1.S1_a_at, Bt.28515.1.A1_at, Bt.29857.1.A1_at, Bt.29857.1.S1_at, Bt.23372.1.S1_a_at, Bt.8706.1.S1_at, Bt.23526.1.S1_at, Bt.22772.1.S1_at, Bt.1088…	2.83193e-10	3.53991e-11	1.54909e-10
GOTERM_BP_ALL	GO:0044238~primary metabolic process	327	0.3746	8.15474e-13	Bt.22322.1.S1_at, Bt.23191.1.S1_at, Bt.9657.1.S1_at, Bt.9797.1.S1_at, Bt.4557.1.S1_at, Bt.26836.2.A1_at, Bt.21875.1.S1_at, Bt.23172.2.S1_at, Bt.3080.1.S1_a_at, Bt.23372.1.S1_a_at, Bt.8706.1.S1_at, Bt.20584.1.S1_at, Bt.10880.1.S1_at, Bt.23179.1.S1_at, Bt.23179.1.S2_at, Bt.5024.1.S1_at, Bt.19709.1.S1_at, Bt.12559.1.S1_at, Bt.15267.1.A1_at, Bt.5131.1.S1_at, Bt.234.1.S1_at, Bt.2723.1.A1_at, Bt.5510.1…	2.71548e-09	3.0172e-10	1.48543e-09
GOTERM_BP_ALL	GO:0044237~cellular metabolic process	323	0.37	5.7519e-12	Bt.22322.1.S1_at, Bt.23191.1.S1_at, Bt.9657.1.S1_at, Bt.9797.1.S1_at, Bt.4557.1.S1_at, Bt.26836.2.A1_at, Bt.23172.2.S1_at, Bt.3080.1.S1_a_at, Bt.23372.1.S1_a_at, Bt.8706.1.S1_at, Bt.20584.1.S1_at, Bt.10880.1.S1_at, Bt.23179.1.S1_at, Bt.23179.1.S2_at, Bt.5024.1.S1_at, Bt.19709.1.S1_at, Bt.12559.1.S1_at, Bt.15267.1.A1_at, Bt.5131.1.S1_at, Bt.234.1.S1_at, Bt.2723.1.A1_at, Bt.5510.1.S1_at, Bt.26817.2…	1.91536e-08	1.91536e-09	1.04776e-08
GOTERM_BP_ALL	GO:0043170~macromolecule metabolic process	270	0.3093	6.79696e-08	Bt.22322.1.S1_at, Bt.23191.1.S1_at, Bt.9797.1.S1_at, Bt.4557.1.S1_at, Bt.23172.2.S1_at, Bt.3080.1.S1_a_at, Bt.8706.1.S1_at, Bt.23372.1.S1_a_at, Bt.10880.1.S1_at, Bt.5024.1.S1_at, Bt.23179.1.S1_at, Bt.23179.1.S2_at, Bt.19709.1.S1_at, Bt.15267.1.A1_at, Bt.5131.1.S1_at, Bt.234.1.S1_at, Bt.26817.2.S1_at, Bt.4680.1.S1_at, Bt.621.1.S1_at, Bt.2136.1.S1_at, Bt.5495.1.S1_at, Bt.2822.1.S1_at, Bt.1226.1.S1_…	0.000226313	1.88614e-05	0.000123813
GOTERM_BP_ALL	GO:0009987~cellular process	427	0.4891	0.00310969	Bt.9657.1.S1_at, Bt.9797.1.S1_at, Bt.4557.1.S1_at, Bt.2949.1.S1_at, Bt.6438.1.A1_at, Bt.3080.1.S1_a_at, Bt.20584.1.S1_at, Bt.10880.1.S1_at, Bt.5024.1.S1_at, Bt.19709.1.S1_at, Bt.15267.1.A1_at, Bt.2723.1.A1_at, Bt.5510.1.S1_at, Bt.2822.1.S1_at, Bt.4834.1.S1_at, Bt.20533.1.S1_at, Bt.21918.2.S1_at, Bt.13553.2.S1_a_at, Bt.13553.1.S1_at, Bt.15993.1.S1_s_at, Bt.3005.1.S1_at, Bt.10831.1.S1_at, Bt.18325.…	0.999969	0.198017	5.51549
Functional Group 4	Median: 1.2184999270958988E-11	Geo: 6.745733820632341E-11	Bt.4748.1.S1_at, Bt.1990.1.S1_at, Bt.5218.1.S1_at, Bt.11465.1.S1_at, Bt.13220.1.S1_at, Bt.9797.1.S1_at, Bt.77.1.S1_at, Bt.6465.1.S1_at, Bt.23170.1.S1_at, Bt.26836.2.A1_at, Bt.7194.1.S1_at, Bt.59.1.S1_at, Bt.23172.2.S1_at, Bt.3960.2.S1_at, Bt.3960.1.S1_a_at, Bt.404.1.S1_at, Bt.3080.1.S1_a_at, Bt.23372.1.S1_a_at, Bt.23526.1.S1_at, Bt.10880.1.S1_at, Bt.19709.1.S1_at, Bt.15267.1.A1_at, Bt.29281.1.S1_…
Category	Term	Count	%	PValue	Genes	Bonferroni	Benjamini	FDR
GOTERM_CC_ALL	GO:0044422~organelle part	147	0.1684	7.61992e-12	Bt.4748.1.S1_at, Bt.1990.1.S1_at, Bt.5218.1.S1_at, Bt.11465.1.S1_at, Bt.13220.1.S1_at, Bt.9797.1.S1_at, Bt.77.1.S1_at, Bt.6465.1.S1_at, Bt.23170.1.S1_at, Bt.26836.2.A1_at, Bt.7194.1.S1_at, Bt.59.1.S1_at, Bt.23172.2.S1_at, Bt.3960.2.S1_at, Bt.3960.1.S1_a_at, Bt.404.1.S1_at, Bt.3080.1.S1_a_at, Bt.23372.1.S1_a_at, Bt.23526.1.S1_at, Bt.10880.1.S1_at, Bt.19709.1.S1_at, Bt.15267.1.A1_at, Bt.29281.1.S1_…	4.26715e-09	3.28242e-10	1.11477e-08
GOTERM_CC_ALL	GO:0044446~intracellular organelle part	146	0.1672	1.2185e-11	Bt.4748.1.S1_at, Bt.1990.1.S1_at, Bt.5218.1.S1_at, Bt.11465.1.S1_at, Bt.13220.1.S1_at, Bt.9797.1.S1_at, Bt.77.1.S1_at, Bt.6465.1.S1_at, Bt.23170.1.S1_at, Bt.26836.2.A1_at, Bt.7194.1.S1_at, Bt.59.1.S1_at, Bt.23172.2.S1_at, Bt.3960.2.S1_at, Bt.3960.1.S1_a_at, Bt.404.1.S1_at, Bt.3080.1.S1_a_at, Bt.23372.1.S1_a_at, Bt.23526.1.S1_at, Bt.10880.1.S1_at, Bt.19709.1.S1_at, Bt.15267.1.A1_at, Bt.29281.1.S1_…	6.82362e-09	4.87401e-10	1.78264e-08
GOTERM_CC_ALL	GO:0031090~organelle membrane	74	0.0848	3.30607e-09	Bt.20296.1.S1_at, Bt.1990.1.S1_at, Bt.3525.1.S1_at, Bt.869.1.S1_at, Bt.5049.1.S1_at, Bt.11465.1.S1_at, Bt.19522.1.S1_at, Bt.58.1.S1_at, Bt.77.1.S1_at, Bt.6465.1.S1_at, Bt.10146.1.S1_at, Bt.10146.2.S1_at, Bt.868.1.S1_a_at, Bt.26836.2.A1_at, Bt.7194.1.S1_at, Bt.59.1.S1_at, Bt.3960.2.S1_at, Bt.3960.1.S1_a_at, Bt.404.1.S1_at, Bt.6289.1.S1_at, Bt.10880.1.S1_at, Bt.19709.1.S1_at, Bt.29281.1.S1_at, Bt.2…	1.8514e-06	1.08906e-07	4.8367e-06
Functional Group 5	Median: 1.1136149239587371E-8	Geo: 2.3097918223148924E-8	Bt.20296.1.S1_at, Bt.4748.1.S1_at, Bt.5218.1.S1_at, Bt.3525.1.S1_at, Bt.11339.1.S1_at, Bt.442.1.S1_at, Bt.11188.1.S1_at, Bt.9797.1.S1_at, Bt.10146.1.S1_at, Bt.10146.2.S1_at, Bt.58.1.S1_at, Bt.6465.1.S1_at, Bt.77.1.S1_at, Bt.11014.1.S1_at, Bt.21070.1.S1_at, Bt.26836.2.A1_at, Bt.7194.1.S1_at, Bt.59.1.S1_at, Bt.3960.2.S1_at, Bt.3960.1.S1_a_at, Bt.404.1.S1_at, Bt.4540.1.S1_at, Bt.4476.1.S1_at, Bt.235…
Category	Term	Count	%	PValue	Genes	Bonferroni	Benjamini	FDR
GOTERM_CC_ALL	GO:0005739~mitochondrion	83	0.0951	6.70422e-13	Bt.20296.1.S1_at, Bt.4748.1.S1_at, Bt.5218.1.S1_at, Bt.3525.1.S1_at, Bt.11339.1.S1_at, Bt.442.1.S1_at, Bt.11188.1.S1_at, Bt.9797.1.S1_at, Bt.10146.1.S1_at, Bt.10146.2.S1_at, Bt.58.1.S1_at, Bt.6465.1.S1_at, Bt.77.1.S1_at, Bt.11014.1.S1_at, Bt.21070.1.S1_at, Bt.26836.2.A1_at, Bt.7194.1.S1_at, Bt.59.1.S1_at, Bt.3960.2.S1_at, Bt.3960.1.S1_a_at, Bt.404.1.S1_at, Bt.4540.1.S1_at, Bt.4476.1.S1_at, Bt.235…	3.7546e-10	3.41327e-11	9.80871e-10
GOTERM_CC_ALL	GO:0044429~mitochondrial part	53	0.0607	1.33973e-10	Bt.20296.1.S1_at, Bt.4748.1.S1_at, Bt.5218.1.S1_at, Bt.3525.1.S1_at, Bt.9797.1.S1_at, Bt.77.1.S1_at, Bt.6465.1.S1_at, Bt.58.1.S1_at, Bt.10146.1.S1_at, Bt.10146.2.S1_at, Bt.11014.1.S1_at, Bt.7194.1.S1_at, Bt.26836.2.A1_at, Bt.59.1.S1_at, Bt.3960.2.S1_at, Bt.3960.1.S1_a_at, Bt.404.1.S1_at, Bt.23526.1.S1_at, Bt.10880.1.S1_at, Bt.5400.1.S1_at, Bt.5033.1.S1_at, Bt.4637.1.A1_a_at, Bt.29570.1.S1_at, Bt.…	7.5025e-08	5.00166e-09	1.95999e-07
GOTERM_CC_ALL	GO:0031975~envelope	50	0.0573	1.61929e-09	Bt.20296.1.S1_at, Bt.3525.1.S1_at, Bt.5049.1.S1_at, Bt.77.1.S1_at, Bt.6465.1.S1_at, Bt.58.1.S1_at, Bt.10146.1.S1_at, Bt.10146.2.S1_at, Bt.11014.1.S1_at, Bt.7194.1.S1_at, Bt.26836.2.A1_at, Bt.59.1.S1_at, Bt.3960.2.S1_at, Bt.3960.1.S1_a_at, Bt.404.1.S1_at, Bt.10880.1.S1_at, Bt.19709.1.S1_at, Bt.5033.1.S1_at, Bt.4637.1.A1_a_at, Bt.29570.1.S1_at, Bt.11714.1.S1_at, Bt.4099.1.S1_at, Bt.2711.1.S1_at, Bt…	9.068e-07	5.6675e-08	2.36898e-06
GOTERM_CC_ALL	GO:0031090~organelle membrane	74	0.0848	3.30607e-09	Bt.20296.1.S1_at, Bt.1990.1.S1_at, Bt.3525.1.S1_at, Bt.869.1.S1_at, Bt.5049.1.S1_at, Bt.11465.1.S1_at, Bt.19522.1.S1_at, Bt.58.1.S1_at, Bt.77.1.S1_at, Bt.6465.1.S1_at, Bt.10146.1.S1_at, Bt.10146.2.S1_at, Bt.868.1.S1_a_at, Bt.26836.2.A1_at, Bt.7194.1.S1_at, Bt.59.1.S1_at, Bt.3960.2.S1_at, Bt.3960.1.S1_a_at, Bt.404.1.S1_at, Bt.6289.1.S1_at, Bt.10880.1.S1_at, Bt.19709.1.S1_at, Bt.29281.1.S1_at, Bt.2…	1.8514e-06	1.08906e-07	4.8367e-06
GOTERM_CC_ALL	GO:0031967~organelle envelope	49	0.0561	3.35221e-09	Bt.20296.1.S1_at, Bt.3525.1.S1_at, Bt.5049.1.S1_at, Bt.77.1.S1_at, Bt.6465.1.S1_at, Bt.58.1.S1_at, Bt.10146.1.S1_at, Bt.10146.2.S1_at, Bt.11014.1.S1_at, Bt.7194.1.S1_at, Bt.26836.2.A1_at, Bt.59.1.S1_at, Bt.3960.2.S1_at, Bt.3960.1.S1_a_at, Bt.404.1.S1_at, Bt.10880.1.S1_at, Bt.19709.1.S1_at, Bt.5033.1.S1_at, Bt.4637.1.A1_a_at, Bt.29570.1.S1_at, Bt.11714.1.S1_at, Bt.4099.1.S1_at, Bt.2711.1.S1_at, Bt…	1.87724e-06	1.04291e-07	4.9042e-06
GOTERM_CC_ALL	GO:0005740~mitochondrial envelope	42	0.0481	5.60058e-09	Bt.20296.1.S1_at, Bt.3525.1.S1_at, Bt.20227.1.S1_at, Bt.10146.1.S1_at, Bt.10146.2.S1_at, Bt.58.1.S1_at, Bt.6465.1.S1_at, Bt.77.1.S1_at, Bt.24270.1.S1_at, Bt.11014.1.S1_at, Bt.75.1.S1_at, Bt.4970.1.S1_at, Bt.26836.2.A1_at, Bt.7194.1.S1_at, Bt.10808.1.S1_at, Bt.59.1.S1_at, Bt.1316.1.S1_at, Bt.1316.1.S2_at, Bt.26712.1.S1_at, Bt.20383.1.S1_at, Bt.3960.2.S1_at, Bt.3960.1.S1_a_at, Bt.8047.1.S1_at, Bt.4…	3.13632e-06	1.6507e-07	8.1935e-06
GOTERM_CC_ALL	GO:0031966~mitochondrial membrane	40	0.0458	1.66717e-08	Bt.20296.1.S1_at, Bt.3525.1.S1_at, Bt.20227.1.S1_at, Bt.10146.1.S1_at, Bt.10146.2.S1_at, Bt.58.1.S1_at, Bt.6465.1.S1_at, Bt.77.1.S1_at, Bt.24270.1.S1_at, Bt.4970.1.S1_at, Bt.26836.2.A1_at, Bt.7194.1.S1_at, Bt.10808.1.S1_at, Bt.59.1.S1_at, Bt.1316.1.S1_at, Bt.1316.1.S2_at, Bt.26712.1.S1_at, Bt.20383.1.S1_at, Bt.3960.2.S1_at, Bt.3960.1.S1_a_at, Bt.8047.1.S1_at, Bt.404.1.S1_at, Bt.63.1.S1_at, Bt.61.…	9.33612e-06	4.66808e-07	2.43903e-05
GOTERM_CC_ALL	GO:0019866~organelle inner membrane	36	0.0412	2.59799e-08	Bt.20296.1.S1_at, Bt.3525.1.S1_at, Bt.714.1.S1_at, Bt.20227.1.S1_at, Bt.58.1.S1_at, Bt.6465.1.S1_at, Bt.77.1.S1_at, Bt.24270.1.S1_at, Bt.4970.1.S1_at, Bt.7194.1.S1_at, Bt.10808.1.S1_at, Bt.59.1.S1_at, Bt.1316.1.S1_at, Bt.1316.1.S2_at, Bt.26712.1.S1_at, Bt.20383.1.S1_at, Bt.404.1.S1_at, Bt.63.1.S1_at, Bt.61.1.S1_at, Bt.10880.1.S1_at, Bt.265.1.S1_at, Bt.9826.1.S1_at, Bt.5033.1.S1_at, Bt.4637.1.A1_a…	1.45486e-05	6.61305e-07	3.80079e-05
GOTERM_CC_ALL	GO:0005743~mitochondrial inner membrane	35	0.0401	4.84986e-08	Bt.20296.1.S1_at, Bt.3525.1.S1_at, Bt.20227.1.S1_at, Bt.58.1.S1_at, Bt.6465.1.S1_at, Bt.77.1.S1_at, Bt.24270.1.S1_at, Bt.4970.1.S1_at, Bt.7194.1.S1_at, Bt.10808.1.S1_at, Bt.59.1.S1_at, Bt.1316.1.S1_at, Bt.1316.1.S2_at, Bt.26712.1.S1_at, Bt.20383.1.S1_at, Bt.404.1.S1_at, Bt.63.1.S1_at, Bt.61.1.S1_at, Bt.10880.1.S1_at, Bt.265.1.S1_at, Bt.9826.1.S1_at, Bt.5033.1.S1_at, Bt.4637.1.A1_a_at, Bt.67.1.S1_…	2.71589e-05	1.18084e-06	7.09523e-05
KEGG_PATHWAY	bta00190:Oxidative phosphorylation	27	0.0309	2.77465e-06	Bt.1990.1.S1_at, Bt.5029.1.S1_at, Bt.3998.1.S1_at, Bt.442.1.S1_at, Bt.58.1.S1_at, Bt.77.1.S1_at, Bt.4970.1.S1_at, Bt.75.1.S1_at, Bt.7194.1.S1_at, Bt.59.1.S1_at, Bt.8047.1.S1_at, Bt.404.1.S1_at, Bt.4540.1.S1_at, Bt.63.1.S1_at, Bt.61.1.S1_at, Bt.265.1.S1_at, Bt.9826.1.S1_at, Bt.2541.1.S1_at, Bt.5033.1.S1_at, Bt.4637.1.A1_a_at, Bt.67.1.S1_at, Bt.5510.1.S1_at, Bt.6483.1.A1_at, Bt.24376.1.S1_at, Bt.13…	0.000513179	0.000256623	0.00343325
SP_PIR_KEYWORDS	transit peptide	35	0.0401	7.17643e-05	Bt.4748.1.S1_at, Bt.5218.1.S1_at, Bt.442.1.S1_at, Bt.11188.1.S1_at, Bt.9797.1.S1_at, Bt.58.1.S1_at, Bt.77.1.S1_at, Bt.6873.1.A1_at, Bt.21070.1.S1_at, Bt.4970.1.S1_at, Bt.7194.1.S1_at, Bt.1316.1.S1_at, Bt.1316.1.S2_at, Bt.8047.1.S1_at, Bt.404.1.S1_at, Bt.4540.1.S1_at, Bt.8624.1.S1_at, Bt.4476.1.S1_at, Bt.19676.2.S1_a_at, Bt.10880.1.S1_at, Bt.436.1.S1_at, Bt.8421.1.A1_at, Bt.16082.1.S1_at, Bt.265.1…	0.0513816	0.00875291	0.108876
SP_PIR_KEYWORDS	Mitochondrion	54	0.0619	0.000610724	Bt.20296.1.S1_at, Bt.4748.1.S1_at, Bt.5218.1.S1_at, Bt.442.1.S1_at, Bt.11188.1.S1_at, Bt.9797.1.S1_at, Bt.58.1.S1_at, Bt.77.1.S1_at, Bt.10146.1.S1_at, Bt.10146.2.S1_at, Bt.21070.1.S1_at, Bt.7194.1.S1_at, Bt.59.1.S1_at, Bt.3960.2.S1_at, Bt.3960.1.S1_a_at, Bt.404.1.S1_at, Bt.4540.1.S1_at, Bt.4476.1.S1_at, Bt.19676.2.S1_a_at, Bt.10880.1.S1_at, Bt.5400.1.S1_at, Bt.5033.1.S1_at, Bt.4637.1.A1_a_at, Bt.…	0.361746	0.0545813	0.92302
Functional Group 6	Median: 8.439751220757026E-6	Geo: 1.3506960484761352E-5	Bt.23179.1.S1_at, Bt.23179.1.S2_at, Bt.5150.1.S1_at, Bt.4314.1.S1_at, Bt.23128.2.A1_at, Bt.5517.1.S2_at, Bt.22854.2.S1_at, Bt.4691.1.S1_at, Bt.12309.1.S1_at, Bt.28686.2.S1_at, Bt.2891.1.S1_at, Bt.83.2.A1_at, Bt.4273.1.S1_at, Bt.29939.1.S1_at, Bt.29939.2.S1_at, Bt.3080.1.S1_a_at, Bt.4646.1.S1_at, Bt.4035.1.S1_at, Bt.4360.1.S1_at, Bt.24256.1.S1_at, Bt.5000.1.S1_at, Bt.23103.1.S1_at, Bt.27347.1.A1_a…
Category	Term	Count	%	PValue	Genes	Bonferroni	Benjamini	FDR
GOTERM_CC_ALL	GO:0048770~pigment granule	15	0.0172	4.10659e-06	Bt.23179.1.S1_at, Bt.23179.1.S2_at, Bt.5150.1.S1_at, Bt.4314.1.S1_at, Bt.23128.2.A1_at, Bt.5517.1.S2_at, Bt.22854.2.S1_at, Bt.4691.1.S1_at, Bt.12309.1.S1_at, Bt.28686.2.S1_at, Bt.2891.1.S1_at, Bt.83.2.A1_at, Bt.4273.1.S1_at, Bt.29939.1.S1_at, Bt.29939.2.S1_at, Bt.3080.1.S1_a_at, Bt.4646.1.S1_at, Bt.4035.1.S1_at,	0.00229705	8.51702e-05	0.00600766
GOTERM_CC_ALL	GO:0042470~melanosome	15	0.0172	4.10659e-06	Bt.23179.1.S1_at, Bt.23179.1.S2_at, Bt.5150.1.S1_at, Bt.4314.1.S1_at, Bt.23128.2.A1_at, Bt.5517.1.S2_at, Bt.22854.2.S1_at, Bt.4691.1.S1_at, Bt.12309.1.S1_at, Bt.28686.2.S1_at, Bt.2891.1.S1_at, Bt.83.2.A1_at, Bt.4273.1.S1_at, Bt.29939.1.S1_at, Bt.29939.2.S1_at, Bt.3080.1.S1_a_at, Bt.4646.1.S1_at, Bt.4035.1.S1_at,	0.00229705	8.51702e-05	0.00600766
GOTERM_CC_ALL	GO:0031410~cytoplasmic vesicle	28	0.0321	7.90338e-06	Bt.4360.1.S1_at, Bt.4314.1.S1_at, Bt.24256.1.S1_at, Bt.5000.1.S1_at, Bt.28686.2.S1_at, Bt.2891.1.S1_at, Bt.23103.1.S1_at, Bt.83.2.A1_at, Bt.4273.1.S1_at, Bt.29939.1.S1_at, Bt.29939.2.S1_at, Bt.3080.1.S1_a_at, Bt.27347.1.A1_at, Bt.23179.1.S1_at, Bt.23179.1.S2_at, Bt.13163.1.A1_at, Bt.13163.1.S1_at, Bt.29281.1.S1_at, Bt.9026.1.S1_at, Bt.5150.1.S1_at, Bt.23128.2.A1_at, Bt.5517.1.S2_at, Bt.22854.2.S1…	0.00441613	0.000147519	0.0115618
GOTERM_CC_ALL	GO:0031982~vesicle	28	0.0321	8.97613e-06	Bt.4360.1.S1_at, Bt.4314.1.S1_at, Bt.24256.1.S1_at, Bt.5000.1.S1_at, Bt.28686.2.S1_at, Bt.2891.1.S1_at, Bt.23103.1.S1_at, Bt.83.2.A1_at, Bt.4273.1.S1_at, Bt.29939.1.S1_at, Bt.29939.2.S1_at, Bt.3080.1.S1_a_at, Bt.27347.1.A1_at, Bt.23179.1.S1_at, Bt.23179.1.S2_at, Bt.13163.1.A1_at, Bt.13163.1.S1_at, Bt.29281.1.S1_at, Bt.9026.1.S1_at, Bt.5150.1.S1_at, Bt.23128.2.A1_at, Bt.5517.1.S2_at, Bt.22854.2.S1…	0.00501404	0.000162137	0.013131
GOTERM_CC_ALL	GO:0016023~cytoplasmic membrane-bound vesicle	22	0.0252	6.67606e-05	Bt.23179.1.S1_at, Bt.23179.1.S2_at, Bt.29281.1.S1_at, Bt.5150.1.S1_at, Bt.4314.1.S1_at, Bt.23128.2.A1_at, Bt.5517.1.S2_at, Bt.24256.1.S1_at, Bt.4691.1.S1_at, Bt.5000.1.S1_at, Bt.22854.2.S1_at, Bt.23205.1.S1_s_at, Bt.12309.1.S1_at, Bt.28686.2.S1_at, Bt.2891.1.S1_at, Bt.26992.1.A1_at, Bt.23103.1.S1_at, Bt.83.2.A1_at, Bt.3079.1.S1_at, Bt.4273.1.S1_at, Bt.29939.1.S1_at, Bt.29939.2.S1_at, Bt.3080.1.S1…	0.0366969	0.0011323	0.0976246
GOTERM_CC_ALL	GO:0031988~membrane-bound vesicle	22	0.0252	7.6026e-05	Bt.23179.1.S1_at, Bt.23179.1.S2_at, Bt.29281.1.S1_at, Bt.5150.1.S1_at, Bt.4314.1.S1_at, Bt.23128.2.A1_at, Bt.5517.1.S2_at, Bt.24256.1.S1_at, Bt.4691.1.S1_at, Bt.5000.1.S1_at, Bt.22854.2.S1_at, Bt.23205.1.S1_s_at, Bt.12309.1.S1_at, Bt.28686.2.S1_at, Bt.2891.1.S1_at, Bt.26992.1.A1_at, Bt.23103.1.S1_at, Bt.83.2.A1_at, Bt.3079.1.S1_at, Bt.4273.1.S1_at, Bt.29939.1.S1_at, Bt.29939.2.S1_at, Bt.3080.1.S1…	0.0416826	0.00125146	0.111167
Functional Group 7	Median: 2.2056980923138676E-5	Geo: 2.0072938308264386E-5	Bt.13608.1.A1_at, Bt.23001.1.S1_a_at, Bt.1874.1.S1_at, Bt.6873.1.A1_at, Bt.7648.1.S1_at, Bt.5245.2.A1_at, Bt.5245.2.S1_a_at, Bt.26549.1.A1_at, Bt.7863.1.S1_at, Bt.1226.1.S1_a_at, Bt.2131.1.S1_at, Bt.5334.1.S1_at, Bt.15275.1.S1_at, Bt.23172.2.S1_at, Bt.7781.1.S1_at, Bt.23526.1.S1_at, Bt.23372.1.S1_a_at, Bt.4832.1.S1_at, Bt.13205.2.S1_at, Bt.12911.1.S1_at, Bt.7236.1.S1_at, Bt.4476.1.S1_at, Bt.12365…
Category	Term	Count	%	PValue	Genes	Bonferroni	Benjamini	FDR
GOTERM_CC_ALL	GO:0033279~ribosomal subunit	16	0.0183	1.34532e-07	Bt.13608.1.A1_at, Bt.23001.1.S1_a_at, Bt.1874.1.S1_at, Bt.6873.1.A1_at, Bt.7648.1.S1_at, Bt.5245.2.A1_at, Bt.5245.2.S1_a_at, Bt.26549.1.A1_at, Bt.7863.1.S1_at, Bt.1226.1.S1_a_at, Bt.2131.1.S1_at, Bt.5334.1.S1_at, Bt.15275.1.S1_at, Bt.23172.2.S1_at, Bt.7781.1.S1_at, Bt.23526.1.S1_at, Bt.23372.1.S1_a_at, Bt.4832.1.S1_at, Bt.13205.2.S1_at, Bt.12911.1.S1_at,	7.5335e-05	2.89761e-06	0.000196817
GOTERM_CC_ALL	GO:0015935~small ribosomal subunit	10	0.0115	6.47464e-06	Bt.13608.1.A1_at, Bt.23001.1.S1_a_at, Bt.5334.1.S1_at, Bt.1874.1.S1_at, Bt.15275.1.S1_at, Bt.23172.2.S1_at, Bt.7648.1.S1_at, Bt.4832.1.S1_at, Bt.13205.2.S1_at, Bt.5245.2.A1_at, Bt.5245.2.S1_a_at, Bt.26549.1.A1_at, Bt.7863.1.S1_at,	0.00361925	0.00012502	0.00947182
GOTERM_CC_ALL	GO:0005830~cytosolic ribosome (sensu Eukaryota)	7	0.008	2.2057e-05	Bt.1226.1.S1_a_at, Bt.2131.1.S1_at, Bt.13608.1.A1_at, Bt.23001.1.S1_a_at, Bt.1874.1.S1_at, Bt.15275.1.S1_at, Bt.23172.2.S1_at, Bt.7648.1.S1_at, Bt.26549.1.A1_at, Bt.7863.1.S1_at,	0.0122761	0.000385927	0.032264
GOTERM_CC_ALL	GO:0005843~cytosolic small ribosomal subunit (sensu Eukaryota)	6	0.0069	0.000186908	Bt.13608.1.A1_at, Bt.23001.1.S1_a_at, Bt.1874.1.S1_at, Bt.15275.1.S1_at, Bt.23172.2.S1_at, Bt.7648.1.S1_at, Bt.26549.1.A1_at, Bt.7863.1.S1_at,	0.099386	0.00282515	0.273094
GOTERM_CC_ALL	GO:0044445~cytosolic part	11	0.0126	0.000907484	Bt.1226.1.S1_a_at, Bt.2131.1.S1_at, Bt.13608.1.A1_at, Bt.23001.1.S1_a_at, Bt.7236.1.S1_at, Bt.1874.1.S1_at, Bt.15275.1.S1_at, Bt.23172.2.S1_at, Bt.7648.1.S1_at, Bt.4476.1.S1_at, Bt.12365.1.S1_at, Bt.26549.1.A1_at, Bt.7863.1.S1_at, Bt.2575.1.S1_at,	0.398556	0.012324	1.31945
Functional Group 8	Median: 9.050983380579855E-4	Geo: 6.198170288421224E-4	Bt.23244.1.S1_at, Bt.3573.1.S2_at, Bt.3573.1.S1_at, Bt.27192.1.S1_at, Bt.1148.1.S1_at, Bt.23512.1.S1_at, Bt.7323.1.S1_at, Bt.1646.1.S1_at, Bt.26817.2.S1_at, Bt.7887.1.S1_at, Bt.4682.1.S1_at, Bt.5495.1.S1_at, Bt.3050.1.S1_at, Bt.5389.1.S1_at, Bt.3302.1.S1_at, Bt.23172.2.S1_at, Bt.4426.1.S1_at, Bt.5006.1.S1_at, Bt.20306.1.S1_at, Bt.15851.1.S1_at, Bt.23772.1.S1_at, Bt.15993.1.S1_s_at, Bt.6805.1.A1_a…
Category	Term	Count	%	PValue	Genes	Bonferroni	Benjamini	FDR
GOTERM_MF_ALL	GO:0045182~translation regulator activity	19	0.0218	1.25957e-06	Bt.23244.1.S1_at, Bt.3573.1.S2_at, Bt.3573.1.S1_at, Bt.27192.1.S1_at, Bt.1148.1.S1_at, Bt.23512.1.S1_at, Bt.7323.1.S1_at, Bt.1646.1.S1_at, Bt.26817.2.S1_at, Bt.7887.1.S1_at, Bt.4682.1.S1_at, Bt.5495.1.S1_at, Bt.3050.1.S1_at, Bt.5389.1.S1_at, Bt.3302.1.S1_at, Bt.23172.2.S1_at, Bt.4426.1.S1_at, Bt.5006.1.S1_at, Bt.20306.1.S1_at, Bt.15851.1.S1_at, Bt.23772.1.S1_at,	0.00232749	0.000582381	0.00214586
GOTERM_MF_ALL	GO:0008135~translation factor activity, nucleic acid binding	17	0.0195	1.71324e-05	Bt.3573.1.S2_at, Bt.3573.1.S1_at, Bt.27192.1.S1_at, Bt.23244.1.S1_at, Bt.1148.1.S1_at, Bt.23512.1.S1_at, Bt.7323.1.S1_at, Bt.1646.1.S1_at, Bt.26817.2.S1_at, Bt.7887.1.S1_at, Bt.4682.1.S1_at, Bt.5495.1.S1_at, Bt.3050.1.S1_at, Bt.5389.1.S1_at, Bt.3302.1.S1_at, Bt.4426.1.S1_at, Bt.15851.1.S1_at, Bt.20306.1.S1_at, Bt.23772.1.S1_at,	0.0311982	0.006319	0.0291839
GOTERM_BP_ALL	GO:0022613~ribonucleoprotein complex biogenesis and assembly	17	0.0195	6.24057e-05	Bt.23244.1.S1_at, Bt.15993.1.S1_s_at, Bt.1148.1.S1_at, Bt.23512.1.S1_at, Bt.6805.1.A1_at, Bt.20600.1.A1_at, Bt.26817.2.S1_at, Bt.11606.2.S1_at, Bt.5495.1.S1_at, Bt.3050.1.S1_at, Bt.5389.1.S1_at, Bt.27417.2.S1_at, Bt.4426.1.S1_at, Bt.5006.1.S1_at, Bt.2898.3.S1_at, Bt.23772.1.S1_at, Bt.19676.2.S1_a_at,	0.187645	0.011479	0.113617
GOTERM_MF_ALL	GO:0003743~translation initiation factor activity	13	0.0149	7.52158e-05	Bt.23244.1.S1_at, Bt.1148.1.S1_at, Bt.23512.1.S1_at, Bt.26817.2.S1_at, Bt.1646.1.S1_at, Bt.7887.1.S1_at, Bt.4682.1.S1_at, Bt.5495.1.S1_at, Bt.3050.1.S1_at, Bt.5389.1.S1_at, Bt.3302.1.S1_at, Bt.4426.1.S1_at, Bt.15851.1.S1_at, Bt.23772.1.S1_at,	0.129906	0.0172439	0.128065
GOTERM_BP_ALL	GO:0022618~protein-RNA complex assembly	11	0.0126	0.000137948	Bt.23244.1.S1_at, Bt.3050.1.S1_at, Bt.5389.1.S1_at, Bt.1148.1.S1_at, Bt.23512.1.S1_at, Bt.6805.1.A1_at, Bt.4426.1.S1_at, Bt.5006.1.S1_at, Bt.26817.2.S1_at, Bt.23772.1.S1_at, Bt.5495.1.S1_at,	0.368337	0.023889	0.250988
SP_PIR_KEYWORDS	protein biosynthesis	14	0.016	0.000823276	Bt.3573.1.S2_at, Bt.3573.1.S1_at, Bt.23244.1.S1_at, Bt.17036.1.A1_s_at, Bt.1148.1.S1_at, Bt.7323.1.S1_at, Bt.23512.1.S1_at, Bt.1646.1.S1_at, Bt.1552.1.S1_at, Bt.3050.1.S1_at, Bt.3302.1.S1_at, Bt.4426.1.S1_at, Bt.22532.2.S1_at, Bt.15851.1.S1_at, Bt.23772.1.S1_at,	0.454121	0.0650497	1.24239
GOTERM_BP_ALL	GO:0006413~translational initiation	9	0.0103	0.000905098	Bt.23244.1.S1_at, Bt.3050.1.S1_at, Bt.5389.1.S1_at, Bt.1148.1.S1_at, Bt.23512.1.S1_at, Bt.5006.1.S1_at, Bt.26817.2.S1_at, Bt.23772.1.S1_at, Bt.5495.1.S1_at,	0.950971	0.0803476	1.63594
GOTERM_BP_ALL	GO:0006446~regulation of translational initiation	5	0.0057	0.00331512	Bt.5389.1.S1_at, Bt.23512.1.S1_at, Bt.5006.1.S1_at, Bt.23772.1.S1_at, Bt.5495.1.S1_at,	0.999984	0.202016	5.86953
GOTERM_BP_ALL	GO:0006417~regulation of translation	10	0.0115	0.00632573	Bt.11189.1.S1_at, Bt.5389.1.S1_at, Bt.1148.1.S1_at, Bt.23512.1.S1_at, Bt.5006.1.S1_at, Bt.4775.1.S1_at, Bt.23772.1.S1_at, Bt.1747.1.S1_at, Bt.4641.1.S1_at, Bt.5495.1.S1_at,	1	0.30104	10.9164
GOTERM_BP_ALL	GO:0009889~regulation of biosynthetic process	11	0.0126	0.00636196	Bt.23179.1.S1_at, Bt.23179.1.S2_at, Bt.11189.1.S1_at, Bt.5389.1.S1_at, Bt.1148.1.S1_at, Bt.23512.1.S1_at, Bt.5006.1.S1_at, Bt.4775.1.S1_at, Bt.23772.1.S1_at, Bt.1747.1.S1_at, Bt.4641.1.S1_at, Bt.5495.1.S1_at,	1	0.298277	10.9756
GOTERM_BP_ALL	GO:0031326~regulation of cellular biosynthetic process	10	0.0115	0.00932095	Bt.11189.1.S1_at, Bt.5389.1.S1_at, Bt.1148.1.S1_at, Bt.23512.1.S1_at, Bt.5006.1.S1_at, Bt.4775.1.S1_at, Bt.23772.1.S1_at, Bt.1747.1.S1_at, Bt.4641.1.S1_at, Bt.5495.1.S1_at,	1	0.35949	15.683
SP_PIR_KEYWORDS	initiation factor	9	0.0103	0.0119812	Bt.23244.1.S1_at, Bt.3050.1.S1_at, Bt.3302.1.S1_at, Bt.1148.1.S1_at, Bt.23512.1.S1_at, Bt.4426.1.S1_at, Bt.15851.1.S1_at, Bt.23772.1.S1_at, Bt.7887.1.S1_at, Bt.4682.1.S1_at,	0.999858	0.372669	16.72
GOTERM_BP_ALL	GO:0051246~regulation of protein metabolic process	13	0.0149	0.012845	Bt.20455.1.S1_at, Bt.1148.1.S1_at, Bt.23512.1.S1_at, Bt.20275.1.S1_at, Bt.4775.1.S1_at, Bt.177.1.S1_at, Bt.1747.1.S1_at, Bt.5495.1.S1_at, Bt.11189.1.S1_at, Bt.5389.1.S1_at, Bt.5006.1.S1_at, Bt.23772.1.S1_at, Bt.4641.1.S1_at,	1	0.393829	20.9825
Functional Group 9	Median: 0.001006799665018181	Geo: 9.514000619729695E-4	Bt.4748.1.S1_at, Bt.5218.1.S1_at, Bt.13220.1.S1_at, Bt.9797.1.S1_at, Bt.6465.1.S1_at, Bt.6873.1.A1_at, Bt.24270.1.S1_at, Bt.7648.1.S1_at, Bt.11014.1.S1_at, Bt.75.1.S1_at, Bt.1316.1.S1_at, Bt.1316.1.S2_at, Bt.4273.1.S1_at, Bt.29939.1.S1_at, Bt.29939.2.S1_at, Bt.3080.1.S1_a_at, Bt.23526.1.S1_at, Bt.504.1.S1_at, Bt.10880.1.S1_at, Bt.13205.2.S1_at, Bt.3091.1.S1_at, Bt.16082.1.S1_at, Bt.15267.1.A1_at,…
Category	Term	Count	%	PValue	Genes	Bonferroni	Benjamini	FDR
GOTERM_CC_ALL	GO:0043233~organelle lumen	32	0.0367	0.000677431	Bt.4748.1.S1_at, Bt.5218.1.S1_at, Bt.13220.1.S1_at, Bt.9797.1.S1_at, Bt.6465.1.S1_at, Bt.6873.1.A1_at, Bt.24270.1.S1_at, Bt.7648.1.S1_at, Bt.11014.1.S1_at, Bt.75.1.S1_at, Bt.1316.1.S1_at, Bt.1316.1.S2_at, Bt.4273.1.S1_at, Bt.29939.1.S1_at, Bt.29939.2.S1_at, Bt.3080.1.S1_a_at, Bt.23526.1.S1_at, Bt.504.1.S1_at, Bt.10880.1.S1_at, Bt.13205.2.S1_at, Bt.3091.1.S1_at, Bt.16082.1.S1_at, Bt.15267.1.A1_at,…	0.31579	0.00944239	0.986503
GOTERM_CC_ALL	GO:0031974~membrane-enclosed lumen	32	0.0367	0.000677431	Bt.4748.1.S1_at, Bt.5218.1.S1_at, Bt.13220.1.S1_at, Bt.9797.1.S1_at, Bt.6465.1.S1_at, Bt.6873.1.A1_at, Bt.24270.1.S1_at, Bt.7648.1.S1_at, Bt.11014.1.S1_at, Bt.75.1.S1_at, Bt.1316.1.S1_at, Bt.1316.1.S2_at, Bt.4273.1.S1_at, Bt.29939.1.S1_at, Bt.29939.2.S1_at, Bt.3080.1.S1_a_at, Bt.23526.1.S1_at, Bt.504.1.S1_at, Bt.10880.1.S1_at, Bt.13205.2.S1_at, Bt.3091.1.S1_at, Bt.16082.1.S1_at, Bt.15267.1.A1_at,…	0.31579	0.00944239	0.986503
GOTERM_CC_ALL	GO:0005759~mitochondrial matrix	15	0.0172	0.00133617	Bt.4748.1.S1_at, Bt.5218.1.S1_at, Bt.16082.1.S1_at, Bt.5400.1.S1_at, Bt.9797.1.S1_at, Bt.6465.1.S1_at, Bt.24270.1.S1_at, Bt.6873.1.A1_at, Bt.20141.1.S1_at, Bt.1316.1.S1_at, Bt.1316.1.S2_at, Bt.5108.1.S1_at, Bt.21918.2.S1_at, Bt.23526.1.S1_at, Bt.504.1.S1_at, Bt.13205.2.S1_at,	0.527045	0.0172622	1.93708
GOTERM_CC_ALL	GO:0031980~mitochondrial lumen	15	0.0172	0.00133617	Bt.4748.1.S1_at, Bt.5218.1.S1_at, Bt.16082.1.S1_at, Bt.5400.1.S1_at, Bt.9797.1.S1_at, Bt.6465.1.S1_at, Bt.24270.1.S1_at, Bt.6873.1.A1_at, Bt.20141.1.S1_at, Bt.1316.1.S1_at, Bt.1316.1.S2_at, Bt.5108.1.S1_at, Bt.21918.2.S1_at, Bt.23526.1.S1_at, Bt.504.1.S1_at, Bt.13205.2.S1_at,	0.527045	0.0172622	1.93708
Functional Group 10	Median: 0.001145191572452625	Geo: 0.0023975621456783884	Bt.5029.1.S1_at, Bt.1990.1.S1_at, Bt.3998.1.S1_at, Bt.265.1.S1_at, Bt.442.1.S1_at, Bt.2541.1.S1_at, Bt.9826.1.S1_at, Bt.4637.1.A1_a_at, Bt.77.1.S1_at, Bt.5510.1.S1_at, Bt.75.1.S1_at, Bt.4970.1.S1_at, Bt.7194.1.S1_at, Bt.8047.1.S1_at, Bt.404.1.S1_at, Bt.4540.1.S1_at, Bt.4773.3.A1_at, Bt.2816.1.S2_at, Bt.436.1.S1_at, Bt.8421.1.A1_at, Bt.4748.1.S1_at, Bt.5218.1.S1_at, Bt.5033.1.S1_at, Bt.20141.1.S1_…
Category	Term	Count	%	PValue	Genes	Bonferroni	Benjamini	FDR
GOTERM_MF_ALL	GO:0015078~hydrogen ion transmembrane transporter activity	18	0.0206	0.000144581	Bt.5029.1.S1_at, Bt.1990.1.S1_at, Bt.3998.1.S1_at, Bt.265.1.S1_at, Bt.442.1.S1_at, Bt.2541.1.S1_at, Bt.9826.1.S1_at, Bt.4637.1.A1_a_at, Bt.77.1.S1_at, Bt.5510.1.S1_at, Bt.75.1.S1_at, Bt.4970.1.S1_at, Bt.7194.1.S1_at, Bt.8047.1.S1_at, Bt.404.1.S1_at, Bt.4540.1.S1_at, Bt.4773.3.A1_at, Bt.2816.1.S2_at,	0.234706	0.0263949	0.246033
GOTERM_MF_ALL	GO:0015077~monovalent inorganic cation transmembrane transporter activity	18	0.0206	0.000267588	Bt.5029.1.S1_at, Bt.1990.1.S1_at, Bt.3998.1.S1_at, Bt.265.1.S1_at, Bt.442.1.S1_at, Bt.2541.1.S1_at, Bt.9826.1.S1_at, Bt.4637.1.A1_a_at, Bt.77.1.S1_at, Bt.5510.1.S1_at, Bt.75.1.S1_at, Bt.4970.1.S1_at, Bt.7194.1.S1_at, Bt.8047.1.S1_at, Bt.404.1.S1_at, Bt.4540.1.S1_at, Bt.4773.3.A1_at, Bt.2816.1.S2_at,	0.390493	0.0347466	0.454904
UP_SEQ_FEATURE	transit peptide:Mitochondrion	21	0.0241	0.00114519	Bt.436.1.S1_at, Bt.8421.1.A1_at, Bt.4748.1.S1_at, Bt.265.1.S1_at, Bt.5218.1.S1_at, Bt.442.1.S1_at, Bt.4637.1.A1_a_at, Bt.5033.1.S1_at, Bt.2541.1.S1_at, Bt.9826.1.S1_at, Bt.77.1.S1_at, Bt.20141.1.S1_at, Bt.4970.1.S1_at, Bt.7194.1.S1_at, Bt.13170.1.S1_at, Bt.1316.1.S1_at, Bt.1316.1.S2_at, Bt.13324.4.S1_at, Bt.13324.1.S1_a_at, Bt.404.1.S1_at, Bt.4540.1.S1_at, Bt.8624.1.S1_at, Bt.4476.1.S1_at, Bt.108…	0.981687	0.981687	2.07626
SP_PIR_KEYWORDS	membrane-associated complex	10	0.0115	0.0371316	Bt.265.1.S1_at, Bt.442.1.S1_at, Bt.13170.1.S1_at, Bt.4637.1.A1_a_at, Bt.9826.1.S1_at, Bt.2541.1.S1_at, Bt.77.1.S1_at, Bt.4540.1.S1_at, Bt.75.1.S1_at, Bt.7194.1.S1_at,	1	0.643011	43.6932
SP_PIR_KEYWORDS	oxidative phosphorylation	10	0.0115	0.0481558	Bt.265.1.S1_at, Bt.442.1.S1_at, Bt.4637.1.A1_a_at, Bt.9826.1.S1_at, Bt.2541.1.S1_at, Bt.77.1.S1_at, Bt.404.1.S1_at, Bt.4540.1.S1_at, Bt.75.1.S1_at, Bt.7194.1.S1_at,	1	0.689684	52.7231
Functional Group 11	Median: 0.005029272183165648	Geo: 0.002807857979144192	Bt.1990.1.S1_at, Bt.5029.1.S1_at, Bt.3998.1.S1_at, Bt.442.1.S1_at, Bt.11465.1.S1_at, Bt.9756.1.S1_at, Bt.22763.2.S1_a_at, Bt.22763.1.S1_at, Bt.7194.1.S1_at, Bt.26836.2.A1_at, Bt.7283.1.S1_at, Bt.26712.1.S1_at, Bt.20383.1.S1_at, Bt.404.1.S1_at, Bt.8047.1.S1_at, Bt.4540.1.S1_at, Bt.2816.1.S2_at, Bt.26736.2.S1_at, Bt.26736.1.A1_at, Bt.2541.1.S1_at, Bt.5033.1.S1_at, Bt.5510.1.S1_at, Bt.16068.1.A1_at,…
Category	Term	Count	%	PValue	Genes	Bonferroni	Benjamini	FDR
GOTERM_BP_ALL	GO:0006732~coenzyme metabolic process	26	0.0298	6.9418e-08	Bt.1990.1.S1_at, Bt.5029.1.S1_at, Bt.3998.1.S1_at, Bt.442.1.S1_at, Bt.11465.1.S1_at, Bt.9756.1.S1_at, Bt.22763.2.S1_a_at, Bt.22763.1.S1_at, Bt.7194.1.S1_at, Bt.26836.2.A1_at, Bt.7283.1.S1_at, Bt.26712.1.S1_at, Bt.20383.1.S1_at, Bt.404.1.S1_at, Bt.8047.1.S1_at, Bt.4540.1.S1_at, Bt.2816.1.S2_at, Bt.26736.2.S1_at, Bt.26736.1.A1_at, Bt.2541.1.S1_at, Bt.5033.1.S1_at, Bt.5510.1.S1_at, Bt.16068.1.A1_at,…	0.000231135	1.77815e-05	0.000126452
GOTERM_BP_ALL	GO:0051186~cofactor metabolic process	26	0.0298	2.67777e-06	Bt.1990.1.S1_at, Bt.5029.1.S1_at, Bt.3998.1.S1_at, Bt.442.1.S1_at, Bt.11465.1.S1_at, Bt.9756.1.S1_at, Bt.22763.2.S1_a_at, Bt.22763.1.S1_at, Bt.7194.1.S1_at, Bt.26836.2.A1_at, Bt.7283.1.S1_at, Bt.26712.1.S1_at, Bt.20383.1.S1_at, Bt.404.1.S1_at, Bt.8047.1.S1_at, Bt.4540.1.S1_at, Bt.2816.1.S2_at, Bt.26736.2.S1_at, Bt.26736.1.A1_at, Bt.2541.1.S1_at, Bt.5033.1.S1_at, Bt.5510.1.S1_at, Bt.16068.1.A1_at,…	0.00887734	0.000636724	0.00487771
KEGG_PATHWAY	bta00190:Oxidative phosphorylation	27	0.0309	2.77465e-06	Bt.1990.1.S1_at, Bt.5029.1.S1_at, Bt.3998.1.S1_at, Bt.442.1.S1_at, Bt.58.1.S1_at, Bt.77.1.S1_at, Bt.4970.1.S1_at, Bt.75.1.S1_at, Bt.7194.1.S1_at, Bt.59.1.S1_at, Bt.8047.1.S1_at, Bt.404.1.S1_at, Bt.4540.1.S1_at, Bt.63.1.S1_at, Bt.61.1.S1_at, Bt.265.1.S1_at, Bt.9826.1.S1_at, Bt.2541.1.S1_at, Bt.5033.1.S1_at, Bt.4637.1.A1_a_at, Bt.67.1.S1_at, Bt.5510.1.S1_at, Bt.6483.1.A1_at, Bt.24376.1.S1_at, Bt.13…	0.000513179	0.000256623	0.00343325
GOTERM_BP_ALL	GO:0009108~coenzyme biosynthetic process	17	0.0195	5.28924e-05	Bt.1990.1.S1_at, Bt.5029.1.S1_at, Bt.3998.1.S1_at, Bt.442.1.S1_at, Bt.26736.2.S1_at, Bt.26736.1.A1_at, Bt.9756.1.S1_at, Bt.2541.1.S1_at, Bt.5510.1.S1_at, Bt.16068.1.A1_at, Bt.26836.2.A1_at, Bt.7194.1.S1_at, Bt.24978.1.A1_at, Bt.8047.1.S1_at, Bt.404.1.S1_at, Bt.4540.1.S1_at, Bt.4773.3.A1_at, Bt.2816.1.S2_at,	0.161496	0.0116738	0.0963049
GOTERM_BP_ALL	GO:0006753~nucleoside phosphate metabolic process	12	0.0137	5.37315e-05	Bt.5029.1.S1_at, Bt.1990.1.S1_at, Bt.3998.1.S1_at, Bt.442.1.S1_at, Bt.2541.1.S1_at, Bt.5510.1.S1_at, Bt.404.1.S1_at, Bt.8047.1.S1_at, Bt.4540.1.S1_at, Bt.4773.3.A1_at, Bt.7194.1.S1_at, Bt.2816.1.S2_at,	0.163836	0.0104701	0.097832
GOTERM_BP_ALL	GO:0006754~ATP biosynthetic process	12	0.0137	5.37315e-05	Bt.5029.1.S1_at, Bt.1990.1.S1_at, Bt.3998.1.S1_at, Bt.442.1.S1_at, Bt.2541.1.S1_at, Bt.5510.1.S1_at, Bt.404.1.S1_at, Bt.8047.1.S1_at, Bt.4540.1.S1_at, Bt.4773.3.A1_at, Bt.7194.1.S1_at, Bt.2816.1.S2_at,	0.163836	0.0104701	0.097832
GOTERM_MF_ALL	GO:0046933~hydrogen ion transporting ATP synthase activity, rotational mechanism	11	0.0126	7.14387e-05	Bt.5029.1.S1_at, Bt.3998.1.S1_at, Bt.442.1.S1_at, Bt.2541.1.S1_at, Bt.5510.1.S1_at, Bt.404.1.S1_at, Bt.8047.1.S1_at, Bt.4540.1.S1_at, Bt.4773.3.A1_at, Bt.7194.1.S1_at, Bt.2816.1.S2_at,	0.123805	0.0217869	0.121638
GOTERM_MF_ALL	GO:0022890~inorganic cation transmembrane transporter activity	20	0.0229	0.000129803	Bt.5029.1.S1_at, Bt.1990.1.S1_at, Bt.3998.1.S1_at, Bt.265.1.S1_at, Bt.442.1.S1_at, Bt.12565.1.S1_at, Bt.2541.1.S1_at, Bt.9826.1.S1_at, Bt.4637.1.A1_a_at, Bt.77.1.S1_at, Bt.5510.1.S1_at, Bt.75.1.S1_at, Bt.4970.1.S1_at, Bt.7194.1.S1_at, Bt.8872.1.S2_at, Bt.8047.1.S1_at, Bt.404.1.S1_at, Bt.4540.1.S1_at, Bt.4773.3.A1_at, Bt.2816.1.S2_at,	0.213491	0.0263306	0.220911
GOTERM_BP_ALL	GO:0046034~ATP metabolic process	12	0.0137	0.000138595	Bt.5029.1.S1_at, Bt.1990.1.S1_at, Bt.3998.1.S1_at, Bt.442.1.S1_at, Bt.2541.1.S1_at, Bt.5510.1.S1_at, Bt.404.1.S1_at, Bt.8047.1.S1_at, Bt.4540.1.S1_at, Bt.4773.3.A1_at, Bt.7194.1.S1_at, Bt.2816.1.S2_at,	0.369696	0.0228134	0.252163
GOTERM_MF_ALL	GO:0015078~hydrogen ion transmembrane transporter activity	18	0.0206	0.000144581	Bt.5029.1.S1_at, Bt.1990.1.S1_at, Bt.3998.1.S1_at, Bt.265.1.S1_at, Bt.442.1.S1_at, Bt.2541.1.S1_at, Bt.9826.1.S1_at, Bt.4637.1.A1_a_at, Bt.77.1.S1_at, Bt.5510.1.S1_at, Bt.75.1.S1_at, Bt.4970.1.S1_at, Bt.7194.1.S1_at, Bt.8047.1.S1_at, Bt.404.1.S1_at, Bt.4540.1.S1_at, Bt.4773.3.A1_at, Bt.2816.1.S2_at,	0.234706	0.0263949	0.246033
GOTERM_MF_ALL	GO:0046961~hydrogen ion transporting ATPase activity, rotational mechanism	11	0.0126	0.000146243	Bt.5029.1.S1_at, Bt.3998.1.S1_at, Bt.442.1.S1_at, Bt.2541.1.S1_at, Bt.5510.1.S1_at, Bt.404.1.S1_at, Bt.8047.1.S1_at, Bt.4540.1.S1_at, Bt.4773.3.A1_at, Bt.7194.1.S1_at, Bt.2816.1.S2_at,	0.237055	0.0242972	0.248858
GOTERM_MF_ALL	GO:0019829~cation-transporting ATPase activity	12	0.0137	0.000159784	Bt.5029.1.S1_at, Bt.3998.1.S1_at, Bt.442.1.S1_at, Bt.8872.1.S2_at, Bt.2541.1.S1_at, Bt.5510.1.S1_at, Bt.404.1.S1_at, Bt.8047.1.S1_at, Bt.4540.1.S1_at, Bt.4773.3.A1_at, Bt.7194.1.S1_at, Bt.2816.1.S2_at,	0.255933	0.0243344	0.271871
GOTERM_BP_ALL	GO:0015986~ATP synthesis coupled proton transport	11	0.0126	0.000175886	Bt.5029.1.S1_at, Bt.3998.1.S1_at, Bt.442.1.S1_at, Bt.2541.1.S1_at, Bt.5510.1.S1_at, Bt.404.1.S1_at, Bt.8047.1.S1_at, Bt.4540.1.S1_at, Bt.4773.3.A1_at, Bt.7194.1.S1_at, Bt.2816.1.S2_at,	0.443312	0.0275075	0.319908
GOTERM_BP_ALL	GO:0051188~cofactor biosynthetic process	17	0.0195	0.000182267	Bt.1990.1.S1_at, Bt.5029.1.S1_at, Bt.3998.1.S1_at, Bt.442.1.S1_at, Bt.26736.2.S1_at, Bt.26736.1.A1_at, Bt.9756.1.S1_at, Bt.2541.1.S1_at, Bt.5510.1.S1_at, Bt.16068.1.A1_at, Bt.26836.2.A1_at, Bt.7194.1.S1_at, Bt.24978.1.A1_at, Bt.8047.1.S1_at, Bt.404.1.S1_at, Bt.4540.1.S1_at, Bt.4773.3.A1_at, Bt.2816.1.S2_at,	0.455019	0.0272139	0.331497
GOTERM_MF_ALL	GO:0042625~ATPase activity, coupled to transmembrane movement of ions	15	0.0172	0.000258662	Bt.1990.1.S1_at, Bt.27347.1.A1_at, Bt.5029.1.S1_at, Bt.3998.1.S1_at, Bt.442.1.S1_at, Bt.2541.1.S1_at, Bt.5510.1.S1_at, Bt.7194.1.S1_at, Bt.1059.2.S1_at, Bt.8872.1.S2_at, Bt.8047.1.S1_at, Bt.404.1.S1_at, Bt.4540.1.S1_at, Bt.4773.3.A1_at, Bt.2816.1.S2_at,	0.380341	0.0361449	0.439761
GOTERM_MF_ALL	GO:0015077~monovalent inorganic cation transmembrane transporter activity	18	0.0206	0.000267588	Bt.5029.1.S1_at, Bt.1990.1.S1_at, Bt.3998.1.S1_at, Bt.265.1.S1_at, Bt.442.1.S1_at, Bt.2541.1.S1_at, Bt.9826.1.S1_at, Bt.4637.1.A1_a_at, Bt.77.1.S1_at, Bt.5510.1.S1_at, Bt.75.1.S1_at, Bt.4970.1.S1_at, Bt.7194.1.S1_at, Bt.8047.1.S1_at, Bt.404.1.S1_at, Bt.4540.1.S1_at, Bt.4773.3.A1_at, Bt.2816.1.S2_at,	0.390493	0.0347466	0.454904
GOTERM_BP_ALL	GO:0006164~purine nucleotide biosynthetic process	14	0.016	0.000283611	Bt.1990.1.S1_at, Bt.5029.1.S1_at, Bt.3998.1.S1_at, Bt.442.1.S1_at, Bt.2541.1.S1_at, Bt.5510.1.S1_at, Bt.7194.1.S1_at, Bt.8047.1.S1_at, Bt.404.1.S1_at, Bt.1679.1.S1_at, Bt.4540.1.S1_at, Bt.4773.3.A1_at, Bt.983.1.S1_at, Bt.2816.1.S2_at,	0.611149	0.0385923	0.515367
GOTERM_BP_ALL	GO:0009201~ribonucleoside triphosphate biosynthetic process	12	0.0137	0.000384703	Bt.5029.1.S1_at, Bt.1990.1.S1_at, Bt.3998.1.S1_at, Bt.442.1.S1_at, Bt.2541.1.S1_at, Bt.5510.1.S1_at, Bt.404.1.S1_at, Bt.8047.1.S1_at, Bt.4540.1.S1_at, Bt.4773.3.A1_at, Bt.7194.1.S1_at, Bt.2816.1.S2_at,	0.722326	0.0447297	0.698458
GOTERM_BP_ALL	GO:0009142~nucleoside triphosphate biosynthetic process	12	0.0137	0.000384703	Bt.5029.1.S1_at, Bt.1990.1.S1_at, Bt.3998.1.S1_at, Bt.442.1.S1_at, Bt.2541.1.S1_at, Bt.5510.1.S1_at, Bt.404.1.S1_at, Bt.8047.1.S1_at, Bt.4540.1.S1_at, Bt.4773.3.A1_at, Bt.7194.1.S1_at, Bt.2816.1.S2_at,	0.722326	0.0447297	0.698458
GOTERM_BP_ALL	GO:0009145~purine nucleoside triphosphate biosynthetic process	12	0.0137	0.000384703	Bt.5029.1.S1_at, Bt.1990.1.S1_at, Bt.3998.1.S1_at, Bt.442.1.S1_at, Bt.2541.1.S1_at, Bt.5510.1.S1_at, Bt.404.1.S1_at, Bt.8047.1.S1_at, Bt.4540.1.S1_at, Bt.4773.3.A1_at, Bt.7194.1.S1_at, Bt.2816.1.S2_at,	0.722326	0.0447297	0.698458
GOTERM_BP_ALL	GO:0009206~purine ribonucleoside triphosphate biosynthetic process	12	0.0137	0.000384703	Bt.5029.1.S1_at, Bt.1990.1.S1_at, Bt.3998.1.S1_at, Bt.442.1.S1_at, Bt.2541.1.S1_at, Bt.5510.1.S1_at, Bt.404.1.S1_at, Bt.8047.1.S1_at, Bt.4540.1.S1_at, Bt.4773.3.A1_at, Bt.7194.1.S1_at, Bt.2816.1.S2_at,	0.722326	0.0447297	0.698458
GOTERM_BP_ALL	GO:0006163~purine nucleotide metabolic process	14	0.016	0.000619303	Bt.1990.1.S1_at, Bt.5029.1.S1_at, Bt.3998.1.S1_at, Bt.442.1.S1_at, Bt.2541.1.S1_at, Bt.5510.1.S1_at, Bt.7194.1.S1_at, Bt.8047.1.S1_at, Bt.404.1.S1_at, Bt.1679.1.S1_at, Bt.4540.1.S1_at, Bt.4773.3.A1_at, Bt.983.1.S1_at, Bt.2816.1.S2_at,	0.872918	0.0643799	1.12213
GOTERM_CC_ALL	GO:0045259~proton-transporting ATP synthase complex	8	0.0092	0.000630228	Bt.5029.1.S1_at, Bt.442.1.S1_at, Bt.2541.1.S1_at, Bt.404.1.S1_at, Bt.8047.1.S1_at, Bt.4540.1.S1_at, Bt.7194.1.S1_at, Bt.2816.1.S2_at,	0.29745	0.00924748	0.918058
GOTERM_MF_ALL	GO:0022892~substrate-specific transporter activity	56	0.0641	0.000662321	Bt.20296.1.S1_at, Bt.1990.1.S1_at, Bt.11211.1.S1_at, Bt.442.1.S1_at, Bt.5049.1.S1_at, Bt.77.1.S1_at, Bt.7194.1.S1_at, Bt.8363.1.A1_at, Bt.3960.2.S1_at, Bt.3960.1.S1_a_at, Bt.404.1.S1_at, Bt.4540.1.S1_at, Bt.5369.1.S1_at, Bt.13349.1.S1_at, Bt.13163.1.A1_at, Bt.13163.1.S1_at, Bt.29281.1.S1_at, Bt.9026.1.S1_at, Bt.557.1.S1_at, Bt.23659.1.S1_at, Bt.4637.1.A1_a_at, Bt.5510.1.S1_at, Bt.4099.1.S1_at, Bt…	0.706448	0.0737455	1.1224
GOTERM_BP_ALL	GO:0009199~ribonucleoside triphosphate metabolic process	12	0.0137	0.000783472	Bt.5029.1.S1_at, Bt.1990.1.S1_at, Bt.3998.1.S1_at, Bt.442.1.S1_at, Bt.2541.1.S1_at, Bt.5510.1.S1_at, Bt.404.1.S1_at, Bt.8047.1.S1_at, Bt.4540.1.S1_at, Bt.4773.3.A1_at, Bt.7194.1.S1_at, Bt.2816.1.S2_at,	0.926464	0.0718584	1.41759
GOTERM_BP_ALL	GO:0009144~purine nucleoside triphosphate metabolic process	12	0.0137	0.000783472	Bt.5029.1.S1_at, Bt.1990.1.S1_at, Bt.3998.1.S1_at, Bt.442.1.S1_at, Bt.2541.1.S1_at, Bt.5510.1.S1_at, Bt.404.1.S1_at, Bt.8047.1.S1_at, Bt.4540.1.S1_at, Bt.4773.3.A1_at, Bt.7194.1.S1_at, Bt.2816.1.S2_at,	0.926464	0.0718584	1.41759
GOTERM_BP_ALL	GO:0009205~purine ribonucleoside triphosphate metabolic process	12	0.0137	0.000783472	Bt.5029.1.S1_at, Bt.1990.1.S1_at, Bt.3998.1.S1_at, Bt.442.1.S1_at, Bt.2541.1.S1_at, Bt.5510.1.S1_at, Bt.404.1.S1_at, Bt.8047.1.S1_at, Bt.4540.1.S1_at, Bt.4773.3.A1_at, Bt.7194.1.S1_at, Bt.2816.1.S2_at,	0.926464	0.0718584	1.41759
GOTERM_CC_ALL	GO:0016469~proton-transporting two-sector ATPase complex	12	0.0137	0.00096698	Bt.5029.1.S1_at, Bt.1990.1.S1_at, Bt.3998.1.S1_at, Bt.442.1.S1_at, Bt.2541.1.S1_at, Bt.5510.1.S1_at, Bt.404.1.S1_at, Bt.8047.1.S1_at, Bt.4540.1.S1_at, Bt.4773.3.A1_at, Bt.7194.1.S1_at, Bt.2816.1.S2_at,	0.418283	0.0128165	1.40538
GOTERM_BP_ALL	GO:0009141~nucleoside triphosphate metabolic process	12	0.0137	0.00108535	Bt.5029.1.S1_at, Bt.1990.1.S1_at, Bt.3998.1.S1_at, Bt.442.1.S1_at, Bt.2541.1.S1_at, Bt.5510.1.S1_at, Bt.404.1.S1_at, Bt.8047.1.S1_at, Bt.4540.1.S1_at, Bt.4773.3.A1_at, Bt.7194.1.S1_at, Bt.2816.1.S2_at,	0.973115	0.0885539	1.95871
GOTERM_BP_ALL	GO:0006818~hydrogen transport	12	0.0137	0.0014772	Bt.5029.1.S1_at, Bt.1990.1.S1_at, Bt.3998.1.S1_at, Bt.442.1.S1_at, Bt.2541.1.S1_at, Bt.5510.1.S1_at, Bt.404.1.S1_at, Bt.8047.1.S1_at, Bt.4540.1.S1_at, Bt.4773.3.A1_at, Bt.7194.1.S1_at, Bt.2816.1.S2_at,	0.992721	0.1106	2.65693
GOTERM_BP_ALL	GO:0015992~proton transport	12	0.0137	0.0014772	Bt.5029.1.S1_at, Bt.1990.1.S1_at, Bt.3998.1.S1_at, Bt.442.1.S1_at, Bt.2541.1.S1_at, Bt.5510.1.S1_at, Bt.404.1.S1_at, Bt.8047.1.S1_at, Bt.4540.1.S1_at, Bt.4773.3.A1_at, Bt.7194.1.S1_at, Bt.2816.1.S2_at,	0.992721	0.1106	2.65693
GOTERM_MF_ALL	GO:0008324~cation transmembrane transporter activity	32	0.0367	0.00149272	Bt.20296.1.S1_at, Bt.1990.1.S1_at, Bt.5029.1.S1_at, Bt.3998.1.S1_at, Bt.11211.1.S1_at, Bt.442.1.S1_at, Bt.12565.1.S1_at, Bt.77.1.S1_at, Bt.4970.1.S1_at, Bt.75.1.S1_at, Bt.5107.1.S1_at, Bt.7194.1.S1_at, Bt.8363.1.A1_at, Bt.126.1.S2_at, Bt.404.1.S1_at, Bt.8047.1.S1_at, Bt.4540.1.S1_at, Bt.2816.1.S2_at, Bt.265.1.S1_at, Bt.9026.1.S1_at, Bt.9826.1.S1_at, Bt.2541.1.S1_at, Bt.557.1.S1_at, Bt.23659.1.S1_…	0.936935	0.142327	2.51288
GOTERM_BP_ALL	GO:0009152~purine ribonucleotide biosynthetic process	12	0.0137	0.00171271	Bt.5029.1.S1_at, Bt.1990.1.S1_at, Bt.3998.1.S1_at, Bt.442.1.S1_at, Bt.2541.1.S1_at, Bt.5510.1.S1_at, Bt.404.1.S1_at, Bt.8047.1.S1_at, Bt.4540.1.S1_at, Bt.4773.3.A1_at, Bt.7194.1.S1_at, Bt.2816.1.S2_at,	0.996681	0.121669	3.0743
GOTERM_BP_ALL	GO:0009260~ribonucleotide biosynthetic process	12	0.0137	0.00260886	Bt.5029.1.S1_at, Bt.1990.1.S1_at, Bt.3998.1.S1_at, Bt.442.1.S1_at, Bt.2541.1.S1_at, Bt.5510.1.S1_at, Bt.404.1.S1_at, Bt.8047.1.S1_at, Bt.4540.1.S1_at, Bt.4773.3.A1_at, Bt.7194.1.S1_at, Bt.2816.1.S2_at,	0.999833	0.175772	4.64706
GOTERM_BP_ALL	GO:0009150~purine ribonucleotide metabolic process	12	0.0137	0.00339304	Bt.5029.1.S1_at, Bt.1990.1.S1_at, Bt.3998.1.S1_at, Bt.442.1.S1_at, Bt.2541.1.S1_at, Bt.5510.1.S1_at, Bt.404.1.S1_at, Bt.8047.1.S1_at, Bt.4540.1.S1_at, Bt.4773.3.A1_at, Bt.7194.1.S1_at, Bt.2816.1.S2_at,	0.999988	0.20257	6.0035
GOTERM_BP_ALL	GO:0009259~ribonucleotide metabolic process	12	0.0137	0.00491244	Bt.5029.1.S1_at, Bt.1990.1.S1_at, Bt.3998.1.S1_at, Bt.442.1.S1_at, Bt.2541.1.S1_at, Bt.5510.1.S1_at, Bt.404.1.S1_at, Bt.8047.1.S1_at, Bt.4540.1.S1_at, Bt.4773.3.A1_at, Bt.7194.1.S1_at, Bt.2816.1.S2_at,	1	0.26612	8.57996
GOTERM_MF_ALL	GO:0015399~primary active transmembrane transporter activity	16	0.0183	0.00502927	Bt.1990.1.S1_at, Bt.27347.1.A1_at, Bt.5029.1.S1_at, Bt.3998.1.S1_at, Bt.442.1.S1_at, Bt.2541.1.S1_at, Bt.5510.1.S1_at, Bt.7194.1.S1_at, Bt.1059.2.S1_at, Bt.8872.1.S2_at, Bt.8047.1.S1_at, Bt.404.1.S1_at, Bt.4540.1.S1_at, Bt.4773.3.A1_at, Bt.853.1.S1_at, Bt.2816.1.S2_at,	0.999911	0.345565	8.23124
GOTERM_MF_ALL	GO:0015405~P-P-bond-hydrolysis-driven transmembrane transporter activity	16	0.0183	0.00502927	Bt.1990.1.S1_at, Bt.27347.1.A1_at, Bt.5029.1.S1_at, Bt.3998.1.S1_at, Bt.442.1.S1_at, Bt.2541.1.S1_at, Bt.5510.1.S1_at, Bt.7194.1.S1_at, Bt.1059.2.S1_at, Bt.8872.1.S2_at, Bt.8047.1.S1_at, Bt.404.1.S1_at, Bt.4540.1.S1_at, Bt.4773.3.A1_at, Bt.853.1.S1_at, Bt.2816.1.S2_at,	0.999911	0.345565	8.23124
GOTERM_BP_ALL	GO:0006091~generation of precursor metabolites and energy	38	0.0435	0.00533359	Bt.5029.1.S1_at, Bt.4360.1.S1_at, Bt.3998.1.S1_at, Bt.442.1.S1_at, Bt.58.1.S1_at, Bt.6465.1.S1_at, Bt.77.1.S1_at, Bt.75.1.S1_at, Bt.4970.1.S1_at, Bt.7194.1.S1_at, Bt.5534.1.S1_at, Bt.20931.1.S1_at, Bt.5134.1.S1_at, Bt.4434.1.A1_at, Bt.8047.1.S1_at, Bt.404.1.S1_at, Bt.12126.1.S1_at, Bt.4540.1.S1_at, Bt.61.1.S1_at, Bt.2816.1.S2_at, Bt.265.1.S1_at, Bt.9731.1.S1_at, Bt.9826.1.S1_at, Bt.2541.1.S1_at, …	1	0.280922	9.28221
GOTERM_MF_ALL	GO:0022804~active transmembrane transporter activity	24	0.0275	0.00538348	Bt.5029.1.S1_at, Bt.27347.1.A1_at, Bt.1990.1.S1_at, Bt.3998.1.S1_at, Bt.11211.1.S1_at, Bt.442.1.S1_at, Bt.557.1.S1_at, Bt.23659.1.S1_at, Bt.2541.1.S1_at, Bt.4793.1.S1_at, Bt.4793.1.S2_at, Bt.5510.1.S1_at, Bt.13537.1.A1_at, Bt.7194.1.S1_at, Bt.1059.2.S1_at, Bt.8872.1.S2_at, Bt.21137.2.S1_at, Bt.21137.1.S1_at, Bt.8047.1.S1_at, Bt.404.1.S1_at, Bt.4540.1.S1_at, Bt.759.1.S1_at, Bt.4773.3.A1_at, Bt.853…	0.999954	0.340384	8.78624
GOTERM_MF_ALL	GO:0043492~ATPase activity, coupled to movement of substances	15	0.0172	0.00635502	Bt.1990.1.S1_at, Bt.27347.1.A1_at, Bt.5029.1.S1_at, Bt.3998.1.S1_at, Bt.442.1.S1_at, Bt.2541.1.S1_at, Bt.5510.1.S1_at, Bt.7194.1.S1_at, Bt.1059.2.S1_at, Bt.8872.1.S2_at, Bt.8047.1.S1_at, Bt.404.1.S1_at, Bt.4540.1.S1_at, Bt.4773.3.A1_at, Bt.2816.1.S2_at,	0.999992	0.36468	10.2923
GOTERM_MF_ALL	GO:0042626~ATPase activity, coupled to transmembrane movement of substances	15	0.0172	0.00635502	Bt.1990.1.S1_at, Bt.27347.1.A1_at, Bt.5029.1.S1_at, Bt.3998.1.S1_at, Bt.442.1.S1_at, Bt.2541.1.S1_at, Bt.5510.1.S1_at, Bt.7194.1.S1_at, Bt.1059.2.S1_at, Bt.8872.1.S2_at, Bt.8047.1.S1_at, Bt.404.1.S1_at, Bt.4540.1.S1_at, Bt.4773.3.A1_at, Bt.2816.1.S2_at,	0.999992	0.36468	10.2923
GOTERM_BP_ALL	GO:0009165~nucleotide biosynthetic process	15	0.0172	0.00741633	Bt.1990.1.S1_at, Bt.5029.1.S1_at, Bt.3998.1.S1_at, Bt.442.1.S1_at, Bt.2541.1.S1_at, Bt.5510.1.S1_at, Bt.7194.1.S1_at, Bt.1679.1.S1_at, Bt.8047.1.S1_at, Bt.404.1.S1_at, Bt.4540.1.S1_at, Bt.4773.3.A1_at, Bt.28263.1.S1_at, Bt.983.1.S1_at, Bt.2816.1.S2_at,	1	0.325286	12.6807
SP_PIR_KEYWORDS	hydrogen ion transport	11	0.0126	0.00841413	Bt.5029.1.S1_at, Bt.1990.1.S1_at, Bt.3998.1.S1_at, Bt.442.1.S1_at, Bt.2541.1.S1_at, Bt.404.1.S1_at, Bt.8047.1.S1_at, Bt.4540.1.S1_at, Bt.4773.3.A1_at, Bt.7194.1.S1_at, Bt.2816.1.S2_at,	0.997992	0.339023	12.0375
GOTERM_MF_ALL	GO:0005215~transporter activity	65	0.0745	0.00854865	Bt.20296.1.S1_at, Bt.1990.1.S1_at, Bt.11211.1.S1_at, Bt.442.1.S1_at, Bt.5049.1.S1_at, Bt.77.1.S1_at, Bt.7194.1.S1_at, Bt.8363.1.A1_at, Bt.3960.2.S1_at, Bt.3960.1.S1_a_at, Bt.404.1.S1_at, Bt.4540.1.S1_at, Bt.5369.1.S1_at, Bt.13349.1.S1_at, Bt.13163.1.A1_at, Bt.13163.1.S1_at, Bt.29281.1.S1_at, Bt.9026.1.S1_at, Bt.557.1.S1_at, Bt.23659.1.S1_at, Bt.4637.1.A1_a_at, Bt.5510.1.S1_at, Bt.11714.1.S1_at, B…	1	0.432917	13.6073
GOTERM_MF_ALL	GO:0042623~ATPase activity, coupled	20	0.0229	0.00939704	Bt.5029.1.S1_at, Bt.1990.1.S1_at, Bt.27347.1.A1_at, Bt.3998.1.S1_at, Bt.442.1.S1_at, Bt.2541.1.S1_at, Bt.5510.1.S1_at, Bt.28500.1.S1_at, Bt.21415.1.S1_at, Bt.7194.1.S1_at, Bt.1059.2.S1_at, Bt.8872.1.S2_at, Bt.3049.1.A1_at, Bt.8047.1.S1_at, Bt.404.1.S1_at, Bt.4791.1.S1_at, Bt.4540.1.S1_at, Bt.4773.3.A1_at, Bt.15851.1.S1_at, Bt.21433.2.S1_at, Bt.2816.1.S2_at,	1	0.452449	14.8581
GOTERM_BP_ALL	GO:0006119~oxidative phosphorylation	11	0.0126	0.0101235	Bt.5029.1.S1_at, Bt.3998.1.S1_at, Bt.442.1.S1_at, Bt.2541.1.S1_at, Bt.5510.1.S1_at, Bt.404.1.S1_at, Bt.8047.1.S1_at, Bt.4540.1.S1_at, Bt.4773.3.A1_at, Bt.7194.1.S1_at, Bt.2816.1.S2_at,	1	0.363502	16.9186
GOTERM_MF_ALL	GO:0016820~hydrolase activity, acting on acid anhydrides, catalyzing transmembrane movement of substances	15	0.0172	0.0110956	Bt.1990.1.S1_at, Bt.27347.1.A1_at, Bt.5029.1.S1_at, Bt.3998.1.S1_at, Bt.442.1.S1_at, Bt.2541.1.S1_at, Bt.5510.1.S1_at, Bt.7194.1.S1_at, Bt.1059.2.S1_at, Bt.8872.1.S2_at, Bt.8047.1.S1_at, Bt.404.1.S1_at, Bt.4540.1.S1_at, Bt.4773.3.A1_at, Bt.2816.1.S2_at,	1	0.497445	17.3113
GOTERM_MF_ALL	GO:0015075~ion transmembrane transporter activity	40	0.0458	0.0157789	Bt.20296.1.S1_at, Bt.5029.1.S1_at, Bt.1990.1.S1_at, Bt.3998.1.S1_at, Bt.11211.1.S1_at, Bt.442.1.S1_at, Bt.12565.1.S1_at, Bt.77.1.S1_at, Bt.75.1.S1_at, Bt.4970.1.S1_at, Bt.5107.1.S1_at, Bt.7194.1.S1_at, Bt.8363.1.A1_at, Bt.25669.1.S1_at, Bt.126.1.S2_at, Bt.3960.2.S1_at, Bt.3960.1.S1_a_at, Bt.21137.2.S1_at, Bt.21137.1.S1_at, Bt.404.1.S1_at, Bt.8047.1.S1_at, Bt.759.1.S1_at, Bt.4540.1.S1_at, Bt.5369.…	1	0.568581	23.7355
GOTERM_MF_ALL	GO:0016887~ATPase activity	22	0.0252	0.0190549	Bt.5029.1.S1_at, Bt.1990.1.S1_at, Bt.27347.1.A1_at, Bt.3998.1.S1_at, Bt.442.1.S1_at, Bt.2541.1.S1_at, Bt.5510.1.S1_at, Bt.28500.1.S1_at, Bt.21415.1.S1_at, Bt.7194.1.S1_at, Bt.12743.1.A1_at, Bt.1059.2.S1_at, Bt.8872.1.S2_at, Bt.3049.1.A1_at, Bt.8047.1.S1_at, Bt.404.1.S1_at, Bt.4791.1.S1_at, Bt.4540.1.S1_at, Bt.4773.3.A1_at, Bt.15851.1.S1_at, Bt.1404.2.S1_at, Bt.1404.1.S1_at, Bt.1404.3.A1_at, Bt.21…	1	0.617849	27.9468
GOTERM_CC_ALL	GO:0045263~proton-transporting ATP synthase complex, coupling factor F(o)	5	0.0057	0.0191065	Bt.5029.1.S1_at, Bt.2541.1.S1_at, Bt.404.1.S1_at, Bt.8047.1.S1_at, Bt.2816.1.S2_at,	0.99998	0.153126	24.5898
GOTERM_CC_ALL	GO:0033177~proton-transporting two-sector ATPase complex, proton-transporting domain	5	0.0057	0.0191065	Bt.5029.1.S1_at, Bt.2541.1.S1_at, Bt.404.1.S1_at, Bt.8047.1.S1_at, Bt.2816.1.S2_at,	0.99998	0.153126	24.5898
GOTERM_BP_ALL	GO:0055086~nucleobase, nucleoside and nucleotide metabolic process	18	0.0206	0.0195613	Bt.5029.1.S1_at, Bt.436.1.S1_at, Bt.8421.1.A1_at, Bt.1990.1.S1_at, Bt.3998.1.S1_at, Bt.442.1.S1_at, Bt.2541.1.S1_at, Bt.5510.1.S1_at, Bt.5517.1.S2_at, Bt.7194.1.S1_at, Bt.7283.1.S1_at, Bt.1679.1.S1_at, Bt.8047.1.S1_at, Bt.404.1.S1_at, Bt.4540.1.S1_at, Bt.4773.3.A1_at, Bt.28263.1.S1_at, Bt.983.1.S1_at, Bt.2816.1.S2_at,	1	0.488942	30.2225
GOTERM_BP_ALL	GO:0009117~nucleotide metabolic process	17	0.0195	0.0209573	Bt.1990.1.S1_at, Bt.5029.1.S1_at, Bt.3998.1.S1_at, Bt.442.1.S1_at, Bt.2541.1.S1_at, Bt.5510.1.S1_at, Bt.5517.1.S2_at, Bt.7194.1.S1_at, Bt.7283.1.S1_at, Bt.1679.1.S1_at, Bt.8047.1.S1_at, Bt.404.1.S1_at, Bt.4540.1.S1_at, Bt.4773.3.A1_at, Bt.28263.1.S1_at, Bt.983.1.S1_at, Bt.2816.1.S2_at,	1	0.489165	32.0104
SP_PIR_KEYWORDS	transport	57	0.0653	0.0212137	Bt.20296.1.S1_at, Bt.1990.1.S1_at, Bt.4360.1.S1_at, Bt.11211.1.S1_at, Bt.442.1.S1_at, Bt.11188.1.S1_at, Bt.20496.1.S1_at, Bt.7194.1.S1_at, Bt.7785.1.S1_at, Bt.3960.2.S1_at, Bt.3960.1.S1_a_at, Bt.404.1.S1_at, Bt.4540.1.S1_at, Bt.5369.1.S1_at, Bt.13349.1.S1_at, Bt.10880.1.S1_at, Bt.5197.2.S1_at, Bt.29281.1.S1_at, Bt.24676.2.A1_at, Bt.9026.1.S1_at, Bt.5033.1.S1_at, Bt.557.1.S1_at, Bt.23659.1.S1_at, …	1	0.545243	27.7812
GOTERM_MF_ALL	GO:0022891~substrate-specific transmembrane transporter activity	43	0.0493	0.0212362	Bt.20296.1.S1_at, Bt.5029.1.S1_at, Bt.1990.1.S1_at, Bt.3998.1.S1_at, Bt.11211.1.S1_at, Bt.442.1.S1_at, Bt.12565.1.S1_at, Bt.77.1.S1_at, Bt.75.1.S1_at, Bt.4970.1.S1_at, Bt.5107.1.S1_at, Bt.7194.1.S1_at, Bt.8363.1.A1_at, Bt.25669.1.S1_at, Bt.126.1.S2_at, Bt.3960.2.S1_at, Bt.3960.1.S1_a_at, Bt.21137.2.S1_at, Bt.21137.1.S1_at, Bt.8047.1.S1_at, Bt.404.1.S1_at, Bt.4540.1.S1_at, Bt.759.1.S1_at, Bt.5369.…	1	0.638759	30.6283
SP_PIR_KEYWORDS	ATP synthesis	7	0.008	0.0315052	Bt.1990.1.S1_at, Bt.3998.1.S1_at, Bt.442.1.S1_at, Bt.4540.1.S1_at, Bt.4773.3.A1_at, Bt.7194.1.S1_at, Bt.2816.1.S2_at,	1	0.609824	38.4866
GOTERM_BP_ALL	GO:0051179~localization	112	0.1283	0.0401092	Bt.1990.1.S1_at, Bt.2573.1.S1_at, Bt.442.1.S1_at, Bt.6465.1.S1_at, Bt.7194.1.S1_at, Bt.1794.1.S1_a_at, Bt.6438.1.A1_at, Bt.222.1.S1_at, Bt.3960.2.S1_at, Bt.3960.1.S1_a_at, Bt.404.1.S1_at, Bt.4540.1.S1_at, Bt.5369.1.S1_at, Bt.13349.1.S1_at, Bt.10880.1.S1_at, Bt.5197.2.S1_at, Bt.29281.1.S1_at, Bt.24676.2.A1_at, Bt.5510.1.S1_at, Bt.11714.1.S1_at, Bt.4099.1.S1_at, Bt.23205.1.S1_s_at, Bt.5478.1.S1_at,…	1	0.66104	52.5591
GOTERM_BP_ALL	GO:0006810~transport	106	0.1214	0.0402636	Bt.1990.1.S1_at, Bt.442.1.S1_at, Bt.6465.1.S1_at, Bt.7194.1.S1_at, Bt.1794.1.S1_a_at, Bt.222.1.S1_at, Bt.3960.2.S1_at, Bt.3960.1.S1_a_at, Bt.404.1.S1_at, Bt.4540.1.S1_at, Bt.5369.1.S1_at, Bt.13349.1.S1_at, Bt.10880.1.S1_at, Bt.5197.2.S1_at, Bt.24676.2.A1_at, Bt.29281.1.S1_at, Bt.5510.1.S1_at, Bt.11714.1.S1_at, Bt.4099.1.S1_at, Bt.23205.1.S1_s_at, Bt.5478.1.S1_at, Bt.4834.1.S1_at, Bt.1576.1.S1_at,…	1	0.659579	52.6979
GOTERM_BP_ALL	GO:0006812~cation transport	27	0.0309	0.0454498	Bt.1990.1.S1_at, Bt.5029.1.S1_at, Bt.20296.1.S1_at, Bt.3998.1.S1_at, Bt.11211.1.S1_at, Bt.442.1.S1_at, Bt.12565.1.S1_at, Bt.7194.1.S1_at, Bt.8363.1.A1_at, Bt.126.1.S2_at, Bt.404.1.S1_at, Bt.8047.1.S1_at, Bt.21137.2.S1_at, Bt.21137.1.S1_at, Bt.4540.1.S1_at, Bt.2816.1.S2_at, Bt.27347.1.A1_at, Bt.9026.1.S1_at, Bt.2541.1.S1_at, Bt.4793.1.S1_at, Bt.4793.1.S2_at, Bt.5510.1.S1_at, Bt.1059.2.S1_at, Bt.54…	1	0.685236	57.1437
GOTERM_BP_ALL	GO:0051234~establishment of localization	107	0.1226	0.0495709	Bt.1990.1.S1_at, Bt.442.1.S1_at, Bt.6465.1.S1_at, Bt.7194.1.S1_at, Bt.1794.1.S1_a_at, Bt.222.1.S1_at, Bt.3960.2.S1_at, Bt.3960.1.S1_a_at, Bt.404.1.S1_at, Bt.4540.1.S1_at, Bt.5369.1.S1_at, Bt.13349.1.S1_at, Bt.10880.1.S1_at, Bt.5197.2.S1_at, Bt.24676.2.A1_at, Bt.29281.1.S1_at, Bt.5510.1.S1_at, Bt.11714.1.S1_at, Bt.4099.1.S1_at, Bt.23205.1.S1_s_at, Bt.5478.1.S1_at, Bt.4834.1.S1_at, Bt.1576.1.S1_at,…	1	0.701596	60.3917
SP_PIR_KEYWORDS	ion transport	24	0.0275	0.0545114	Bt.20296.1.S1_at, Bt.5029.1.S1_at, Bt.1990.1.S1_at, Bt.3998.1.S1_at, Bt.11211.1.S1_at, Bt.442.1.S1_at, Bt.9026.1.S1_at, Bt.2541.1.S1_at, Bt.5107.1.S1_at, Bt.4099.1.S1_at, Bt.7194.1.S1_at, Bt.5478.1.S1_at, Bt.126.1.S2_at, Bt.3960.2.S1_at, Bt.3960.1.S1_a_at, Bt.21137.2.S1_at, Bt.21137.1.S1_at, Bt.8047.1.S1_at, Bt.404.1.S1_at, Bt.4540.1.S1_at, Bt.4773.3.A1_at, Bt.4802.1.S1_at, Bt.7780.1.S1_at, Bt.53…	1	0.713055	57.2944
GOTERM_MF_ALL	GO:0017111~nucleoside-triphosphatase activity	26	0.0298	0.0751299	Bt.1990.1.S1_at, Bt.3573.1.S2_at, Bt.3573.1.S1_at, Bt.5029.1.S1_at, Bt.3998.1.S1_at, Bt.442.1.S1_at, Bt.7323.1.S1_at, Bt.7194.1.S1_at, Bt.12743.1.A1_at, Bt.3049.1.A1_at, Bt.404.1.S1_at, Bt.8047.1.S1_at, Bt.4540.1.S1_at, Bt.4791.1.S1_at, Bt.15851.1.S1_at, Bt.21433.2.S1_at, Bt.2816.1.S2_at, Bt.27347.1.A1_at, Bt.24017.1.A1_s_at, Bt.4756.1.S1_at, Bt.2541.1.S1_at, Bt.5510.1.S1_at, Bt.28500.1.S1_at, Bt…	1	0.902749	73.5681
GOTERM_MF_ALL	GO:0022857~transmembrane transporter activity	43	0.0493	0.0762678	Bt.20296.1.S1_at, Bt.5029.1.S1_at, Bt.1990.1.S1_at, Bt.3998.1.S1_at, Bt.11211.1.S1_at, Bt.442.1.S1_at, Bt.12565.1.S1_at, Bt.77.1.S1_at, Bt.75.1.S1_at, Bt.4970.1.S1_at, Bt.5107.1.S1_at, Bt.7194.1.S1_at, Bt.8363.1.A1_at, Bt.25669.1.S1_at, Bt.126.1.S2_at, Bt.3960.2.S1_at, Bt.3960.1.S1_a_at, Bt.21137.2.S1_at, Bt.21137.1.S1_at, Bt.8047.1.S1_at, Bt.404.1.S1_at, Bt.4540.1.S1_at, Bt.759.1.S1_at, Bt.5369.…	1	0.902668	74.1167
GOTERM_BP_ALL	GO:0015672~monovalent inorganic cation transport	18	0.0206	0.0784637	Bt.1990.1.S1_at, Bt.5029.1.S1_at, Bt.3998.1.S1_at, Bt.11211.1.S1_at, Bt.442.1.S1_at, Bt.2541.1.S1_at, Bt.4793.1.S1_at, Bt.4793.1.S2_at, Bt.5510.1.S1_at, Bt.7194.1.S1_at, Bt.8363.1.A1_at, Bt.126.1.S2_at, Bt.8047.1.S1_at, Bt.404.1.S1_at, Bt.21137.2.S1_at, Bt.21137.1.S1_at, Bt.4540.1.S1_at, Bt.4773.3.A1_at, Bt.4627.1.S1_at, Bt.2816.1.S2_at,	1	0.809704	77.4285
GOTERM_CC_ALL	GO:0045261~proton-transporting ATP synthase complex, catalytic core F(1)	3	0.0034	0.0852286	Bt.442.1.S1_at, Bt.4540.1.S1_at, Bt.7194.1.S1_at,	1	0.451753	72.8348
SP_PIR_KEYWORDS	CF(0)	5	0.0057	0.0858987	Bt.5029.1.S1_at, Bt.2541.1.S1_at, Bt.404.1.S1_at, Bt.8047.1.S1_at, Bt.2816.1.S2_at,	1	0.784585	74.4183
GOTERM_MF_ALL	GO:0016462~pyrophosphatase activity	26	0.0298	0.106616	Bt.1990.1.S1_at, Bt.3573.1.S2_at, Bt.3573.1.S1_at, Bt.5029.1.S1_at, Bt.3998.1.S1_at, Bt.442.1.S1_at, Bt.7323.1.S1_at, Bt.7194.1.S1_at, Bt.12743.1.A1_at, Bt.3049.1.A1_at, Bt.404.1.S1_at, Bt.8047.1.S1_at, Bt.4540.1.S1_at, Bt.4791.1.S1_at, Bt.15851.1.S1_at, Bt.21433.2.S1_at, Bt.2816.1.S2_at, Bt.27347.1.A1_at, Bt.24017.1.A1_s_at, Bt.4756.1.S1_at, Bt.2541.1.S1_at, Bt.5510.1.S1_at, Bt.28500.1.S1_at, Bt…	1	0.95133	85.3494
GOTERM_CC_ALL	GO:0033178~proton-transporting two-sector ATPase complex, catalytic domain	3	0.0034	0.108378	Bt.442.1.S1_at, Bt.4540.1.S1_at, Bt.7194.1.S1_at,	1	0.506347	81.3293
GOTERM_MF_ALL	GO:0016818~hydrolase activity, acting on acid anhydrides, in phosphorus-containing anhydrides	26	0.0298	0.11593	Bt.1990.1.S1_at, Bt.3573.1.S2_at, Bt.3573.1.S1_at, Bt.5029.1.S1_at, Bt.3998.1.S1_at, Bt.442.1.S1_at, Bt.7323.1.S1_at, Bt.7194.1.S1_at, Bt.12743.1.A1_at, Bt.3049.1.A1_at, Bt.404.1.S1_at, Bt.8047.1.S1_at, Bt.4540.1.S1_at, Bt.4791.1.S1_at, Bt.15851.1.S1_at, Bt.21433.2.S1_at, Bt.2816.1.S2_at, Bt.27347.1.A1_at, Bt.24017.1.A1_s_at, Bt.4756.1.S1_at, Bt.2541.1.S1_at, Bt.5510.1.S1_at, Bt.28500.1.S1_at, Bt…	1	0.948204	87.745
SP_PIR_KEYWORDS	ATP biosynthesis	5	0.0057	0.12189	Bt.5029.1.S1_at, Bt.442.1.S1_at, Bt.2541.1.S1_at, Bt.4540.1.S1_at, Bt.7194.1.S1_at,	1	0.85769	86.0965
GOTERM_MF_ALL	GO:0016817~hydrolase activity, acting on acid anhydrides	26	0.0298	0.138719	Bt.1990.1.S1_at, Bt.3573.1.S2_at, Bt.3573.1.S1_at, Bt.5029.1.S1_at, Bt.3998.1.S1_at, Bt.442.1.S1_at, Bt.7323.1.S1_at, Bt.7194.1.S1_at, Bt.12743.1.A1_at, Bt.3049.1.A1_at, Bt.404.1.S1_at, Bt.8047.1.S1_at, Bt.4540.1.S1_at, Bt.4791.1.S1_at, Bt.15851.1.S1_at, Bt.21433.2.S1_at, Bt.2816.1.S2_at, Bt.27347.1.A1_at, Bt.24017.1.A1_s_at, Bt.4756.1.S1_at, Bt.2541.1.S1_at, Bt.5510.1.S1_at, Bt.28500.1.S1_at, Bt…	1	0.968361	92.1461
SP_PIR_KEYWORDS	cf(1)	3	0.0034	0.170155	Bt.442.1.S1_at, Bt.4540.1.S1_at, Bt.7194.1.S1_at,	1	0.902075	94.1055
GOTERM_BP_ALL	GO:0006811~ion transport	34	0.0389	0.382077	Bt.20296.1.S1_at, Bt.1990.1.S1_at, Bt.5029.1.S1_at, Bt.3998.1.S1_at, Bt.11211.1.S1_at, Bt.442.1.S1_at, Bt.12565.1.S1_at, Bt.5107.1.S1_at, Bt.7194.1.S1_at, Bt.8363.1.A1_at, Bt.25669.1.S1_at, Bt.126.1.S2_at, Bt.3960.2.S1_at, Bt.3960.1.S1_a_at, Bt.404.1.S1_at, Bt.8047.1.S1_at, Bt.21137.2.S1_at, Bt.21137.1.S1_at, Bt.759.1.S1_at, Bt.4540.1.S1_at, Bt.5369.1.S1_at, Bt.13349.1.S1_at, Bt.2816.1.S2_at, Bt.…	1	0.996463	99.9845
Functional Group 12	Median: 0.004461029966404599	Geo: 0.0036516008369256634	Bt.5449.1.S1_at, Bt.23182.1.S1_at, Bt.714.1.S1_at, Bt.499.1.S1_a_at, Bt.20496.1.S1_at, Bt.621.1.S1_at, Bt.4834.1.S1_at, Bt.10609.2.A1_at, Bt.3562.1.S1_at, Bt.20584.1.S1_at, Bt.7157.1.S1_at, Bt.3786.1.S1_a_at, Bt.4641.1.S1_at, Bt.19709.1.S1_at, Bt.12559.1.S1_at, Bt.869.1.S1_at, Bt.11465.1.S1_at, Bt.29570.1.S1_at, Bt.22763.2.S1_a_at, Bt.22763.1.S1_at, Bt.22854.2.S1_at, Bt.26836.2.A1_at, Bt.6143.1.S…
Category	Term	Count	%	PValue	Genes	Bonferroni	Benjamini	FDR
GOTERM_BP_ALL	GO:0008202~steroid metabolic process	13	0.0149	0.00102889	Bt.5449.1.S1_at, Bt.23182.1.S1_at, Bt.714.1.S1_at, Bt.499.1.S1_a_at, Bt.20496.1.S1_at, Bt.621.1.S1_at, Bt.4834.1.S1_at, Bt.10609.2.A1_at, Bt.3562.1.S1_at, Bt.20584.1.S1_at, Bt.7157.1.S1_at, Bt.3786.1.S1_a_at, Bt.4641.1.S1_at,	0.967547	0.0862605	1.85772
GOTERM_BP_ALL	GO:0008610~lipid biosynthetic process	18	0.0206	0.00300687	Bt.19709.1.S1_at, Bt.12559.1.S1_at, Bt.5449.1.S1_at, Bt.869.1.S1_at, Bt.11465.1.S1_at, Bt.714.1.S1_at, Bt.23182.1.S1_at, Bt.29570.1.S1_at, Bt.499.1.S1_a_at, Bt.22763.2.S1_a_at, Bt.22763.1.S1_at, Bt.22854.2.S1_at, Bt.26836.2.A1_at, Bt.621.1.S1_at, Bt.4834.1.S1_at, Bt.6143.1.S1_at, Bt.10609.2.A1_at, Bt.4798.1.S2_at, Bt.20584.1.S1_at,	0.999956	0.195874	5.33782
GOTERM_BP_ALL	GO:0044255~cellular lipid metabolic process	28	0.0321	0.00591519	Bt.5218.1.S1_at, Bt.869.1.S1_at, Bt.11465.1.S1_at, Bt.714.1.S1_at, Bt.499.1.S1_a_at, Bt.22763.2.S1_a_at, Bt.22763.1.S1_at, Bt.20496.1.S1_at, Bt.26836.2.A1_at, Bt.1792.1.S1_at, Bt.5885.1.S1_at, Bt.7157.1.S1_at, Bt.20584.1.S1_at, Bt.4599.1.S1_at, Bt.19709.1.S1_at, Bt.7236.1.S1_at, Bt.12559.1.S1_at, Bt.5449.1.S1_at, Bt.23182.1.S1_at, Bt.29570.1.S1_at, Bt.22854.2.S1_at, Bt.621.1.S1_at, Bt.4834.1.S1_a…	1	0.297273	10.2436
GOTERM_BP_ALL	GO:0006629~lipid metabolic process	32	0.0367	0.00971584	Bt.5218.1.S1_at, Bt.869.1.S1_at, Bt.11465.1.S1_at, Bt.714.1.S1_at, Bt.499.1.S1_a_at, Bt.2568.1.S1_at, Bt.22763.2.S1_a_at, Bt.22763.1.S1_at, Bt.5711.1.S1_at, Bt.20496.1.S1_at, Bt.26836.2.A1_at, Bt.21875.1.S1_at, Bt.1792.1.S1_at, Bt.5963.1.S1_at, Bt.5885.1.S1_at, Bt.7157.1.S1_at, Bt.20584.1.S1_at, Bt.4599.1.S1_at, Bt.19709.1.S1_at, Bt.7236.1.S1_at, Bt.12559.1.S1_at, Bt.5449.1.S1_at, Bt.23182.1.S1_a…	1	0.367399	16.2931
Functional Group 13	Median: 0.006694557232824879	Geo: 0.004219035716381815	Bt.23179.1.S1_at, Bt.23179.1.S2_at, Bt.499.1.S1_a_at, Bt.4775.1.S1_at, Bt.12761.1.A1_at, Bt.1747.1.S1_at, Bt.6074.1.S1_at, Bt.6438.1.A1_at, Bt.8479.1.A1_at, Bt.26992.1.A1_at, Bt.2353.1.S1_at, Bt.4476.1.S1_at, Bt.24343.1.A1_at, Bt.21433.2.S1_at, Bt.12177.1.S1_at, Bt.983.1.S1_at, Bt.9153.1.S1_at, Bt.13134.1.A1_at, Bt.13134.1.S1_at, Bt.18533.1.S1_at, Bt.2899.1.S1_at, Bt.2899.1.S2_at,
Category	Term	Count	%	PValue	Genes	Bonferroni	Benjamini	FDR
GOTERM_MF_ALL	GO:0042802~identical protein binding	15	0.0172	0.000298125	Bt.23179.1.S1_at, Bt.23179.1.S2_at, Bt.499.1.S1_a_at, Bt.4775.1.S1_at, Bt.12761.1.A1_at, Bt.1747.1.S1_at, Bt.6074.1.S1_at, Bt.6438.1.A1_at, Bt.8479.1.A1_at, Bt.26992.1.A1_at, Bt.2353.1.S1_at, Bt.4476.1.S1_at, Bt.24343.1.A1_at, Bt.21433.2.S1_at, Bt.12177.1.S1_at, Bt.983.1.S1_at,	0.42398	0.0361062	0.506693
GOTERM_MF_ALL	GO:0042803~protein homodimerization activity	9	0.0103	0.00669456	Bt.23179.1.S1_at, Bt.23179.1.S2_at, Bt.8479.1.A1_at, Bt.6438.1.A1_at, Bt.26992.1.A1_at, Bt.4775.1.S1_at, Bt.2353.1.S1_at, Bt.499.1.S1_a_at, Bt.1747.1.S1_at, Bt.983.1.S1_at,	0.999996	0.36887	10.8131
GOTERM_MF_ALL	GO:0046983~protein dimerization activity	12	0.0137	0.0376288	Bt.23179.1.S1_at, Bt.23179.1.S2_at, Bt.8479.1.A1_at, Bt.6438.1.A1_at, Bt.9153.1.S1_at, Bt.13134.1.A1_at, Bt.13134.1.S1_at, Bt.18533.1.S1_at, Bt.26992.1.A1_at, Bt.2899.1.S1_at, Bt.2899.1.S2_at, Bt.4775.1.S1_at, Bt.2353.1.S1_at, Bt.499.1.S1_a_at, Bt.1747.1.S1_at, Bt.983.1.S1_at,	1	0.793368	47.9748
Functional Group 14	Median: 0.013334214713862508	Geo: 0.014865337966635512	Bt.21493.1.S1_at, Bt.5049.1.S1_at, Bt.19522.1.S1_at, Bt.11014.1.S1_at, Bt.9051.1.S1_at, Bt.5000.1.S1_at, Bt.23637.1.S1_s_at, Bt.27280.1.A1_at, Bt.23028.1.S1_at, Bt.2891.1.S1_at, Bt.11189.1.S1_at, Bt.7785.1.S1_at, Bt.23103.1.S1_at, Bt.9637.1.S1_at, Bt.10880.1.S1_at, Bt.13163.1.A1_at, Bt.13163.1.S1_at, Bt.21708.1.S1_at, Bt.29281.1.S1_at, Bt.24676.2.A1_at, Bt.461.1.S1_at, Bt.4691.1.S1_at, Bt.927.1.S…
Category	Term	Count	%	PValue	Genes	Bonferroni	Benjamini	FDR
GOTERM_BP_ALL	GO:0015031~protein transport	32	0.0367	0.00564019	Bt.21493.1.S1_at, Bt.5049.1.S1_at, Bt.19522.1.S1_at, Bt.11014.1.S1_at, Bt.9051.1.S1_at, Bt.5000.1.S1_at, Bt.23637.1.S1_s_at, Bt.27280.1.A1_at, Bt.23028.1.S1_at, Bt.2891.1.S1_at, Bt.11189.1.S1_at, Bt.7785.1.S1_at, Bt.23103.1.S1_at, Bt.9637.1.S1_at, Bt.10880.1.S1_at, Bt.13163.1.A1_at, Bt.13163.1.S1_at, Bt.21708.1.S1_at, Bt.29281.1.S1_at, Bt.24676.2.A1_at, Bt.461.1.S1_at, Bt.4691.1.S1_at, Bt.927.1.S…	1	0.289974	9.79022
GOTERM_BP_ALL	GO:0008104~protein localization	34	0.0389	0.00679362	Bt.21493.1.S1_at, Bt.5049.1.S1_at, Bt.19522.1.S1_at, Bt.11014.1.S1_at, Bt.9051.1.S1_at, Bt.5000.1.S1_at, Bt.23637.1.S1_s_at, Bt.27280.1.A1_at, Bt.4797.1.S1_at, Bt.23028.1.S1_at, Bt.2891.1.S1_at, Bt.11189.1.S1_at, Bt.7785.1.S1_at, Bt.23103.1.S1_at, Bt.9637.1.S1_at, Bt.10880.1.S1_at, Bt.13163.1.A1_at, Bt.13163.1.S1_at, Bt.21708.1.S1_at, Bt.29281.1.S1_at, Bt.24676.2.A1_at, Bt.461.1.S1_at, Bt.4691.1.…	1	0.306586	11.6775
GOTERM_BP_ALL	GO:0033036~macromolecule localization	34	0.0389	0.00986465	Bt.21493.1.S1_at, Bt.5049.1.S1_at, Bt.19522.1.S1_at, Bt.11014.1.S1_at, Bt.9051.1.S1_at, Bt.5000.1.S1_at, Bt.23637.1.S1_s_at, Bt.27280.1.A1_at, Bt.4797.1.S1_at, Bt.23028.1.S1_at, Bt.2891.1.S1_at, Bt.11189.1.S1_at, Bt.7785.1.S1_at, Bt.23103.1.S1_at, Bt.9637.1.S1_at, Bt.10880.1.S1_at, Bt.13163.1.A1_at, Bt.13163.1.S1_at, Bt.21708.1.S1_at, Bt.29281.1.S1_at, Bt.24676.2.A1_at, Bt.461.1.S1_at, Bt.4691.1.…	1	0.363789	16.522
GOTERM_BP_ALL	GO:0045184~establishment of protein localization	32	0.0367	0.0117041	Bt.21493.1.S1_at, Bt.5049.1.S1_at, Bt.19522.1.S1_at, Bt.11014.1.S1_at, Bt.9051.1.S1_at, Bt.5000.1.S1_at, Bt.23637.1.S1_s_at, Bt.27280.1.A1_at, Bt.23028.1.S1_at, Bt.2891.1.S1_at, Bt.11189.1.S1_at, Bt.7785.1.S1_at, Bt.23103.1.S1_at, Bt.9637.1.S1_at, Bt.10880.1.S1_at, Bt.13163.1.A1_at, Bt.13163.1.S1_at, Bt.21708.1.S1_at, Bt.29281.1.S1_at, Bt.24676.2.A1_at, Bt.461.1.S1_at, Bt.4691.1.S1_at, Bt.927.1.S…	1	0.387409	19.3023
GOTERM_BP_ALL	GO:0046907~intracellular transport	28	0.0321	0.0149643	Bt.21493.1.S1_at, Bt.5049.1.S1_at, Bt.11014.1.S1_at, Bt.9051.1.S1_at, Bt.5000.1.S1_at, Bt.23637.1.S1_s_at, Bt.27280.1.A1_at, Bt.2891.1.S1_at, Bt.11189.1.S1_at, Bt.23103.1.S1_at, Bt.222.1.S1_at, Bt.7157.1.S1_at, Bt.10880.1.S1_at, Bt.13163.1.A1_at, Bt.13163.1.S1_at, Bt.15534.1.S1_a_at, Bt.24676.2.A1_at, Bt.461.1.S1_at, Bt.29281.1.S1_at, Bt.11714.1.S1_at, Bt.927.1.S1_at, Bt.5308.1.S1_at, Bt.4834.1.S…	1	0.431146	24.0162
GOTERM_BP_ALL	GO:0006886~intracellular protein transport	19	0.0218	0.0205332	Bt.21493.1.S1_at, Bt.13163.1.A1_at, Bt.13163.1.S1_at, Bt.5049.1.S1_at, Bt.29281.1.S1_at, Bt.24676.2.A1_at, Bt.11014.1.S1_at, Bt.9051.1.S1_at, Bt.23637.1.S1_s_at, Bt.27280.1.A1_at, Bt.5000.1.S1_at, Bt.5308.1.S1_at, Bt.2891.1.S1_at, Bt.11189.1.S1_at, Bt.4834.1.S1_at, Bt.23103.1.S1_at, Bt.13218.2.S1_at, Bt.3079.1.S1_at, Bt.853.1.S1_at, Bt.4035.1.S1_at, Bt.10880.1.S1_at,	1	0.488675	31.4719
GOTERM_BP_ALL	GO:0051649~establishment of cellular localization	31	0.0355	0.0357111	Bt.5141.1.S1_at, Bt.5141.1.S2_at, Bt.21493.1.S1_at, Bt.5049.1.S1_at, Bt.11014.1.S1_at, Bt.9051.1.S1_at, Bt.5000.1.S1_at, Bt.23637.1.S1_s_at, Bt.27280.1.A1_at, Bt.2891.1.S1_at, Bt.11189.1.S1_at, Bt.23103.1.S1_at, Bt.222.1.S1_at, Bt.7157.1.S1_at, Bt.10880.1.S1_at, Bt.13163.1.A1_at, Bt.13163.1.S1_at, Bt.15534.1.S1_a_at, Bt.29281.1.S1_at, Bt.24676.2.A1_at, Bt.461.1.S1_at, Bt.11714.1.S1_at, Bt.23205.1…	1	0.635457	48.4394
GOTERM_BP_ALL	GO:0051641~cellular localization	31	0.0355	0.0491209	Bt.5141.1.S1_at, Bt.5141.1.S2_at, Bt.21493.1.S1_at, Bt.5049.1.S1_at, Bt.11014.1.S1_at, Bt.9051.1.S1_at, Bt.5000.1.S1_at, Bt.23637.1.S1_s_at, Bt.27280.1.A1_at, Bt.2891.1.S1_at, Bt.11189.1.S1_at, Bt.23103.1.S1_at, Bt.222.1.S1_at, Bt.7157.1.S1_at, Bt.10880.1.S1_at, Bt.13163.1.A1_at, Bt.13163.1.S1_at, Bt.15534.1.S1_a_at, Bt.29281.1.S1_at, Bt.24676.2.A1_at, Bt.461.1.S1_at, Bt.11714.1.S1_at, Bt.23205.1…	1	0.703412	60.0487
Functional Group 15	Median: 0.02693709158884118	Geo: 0.01807869059033104	Bt.869.1.S1_at, Bt.11465.1.S1_at, Bt.714.1.S1_at, Bt.5000.1.S1_at, Bt.5434.1.S1_at, Bt.14103.1.A1_at, Bt.23387.1.A1_at, Bt.26712.1.S1_at, Bt.20383.1.S1_at, Bt.23103.1.S1_at, Bt.5134.1.S1_at, Bt.4434.1.A1_at, Bt.5397.1.S1_at, Bt.4273.1.S1_at, Bt.29939.1.S1_at, Bt.29939.2.S1_at, Bt.3080.1.S1_a_at, Bt.6289.1.S1_at, Bt.7157.1.S1_at, Bt.19709.1.S1_at, Bt.16079.1.S1_at, Bt.5449.1.S1_at, Bt.4986.1.S1_at…
Category	Term	Count	%	PValue	Genes	Bonferroni	Benjamini	FDR
GOTERM_CC_ALL	GO:0005783~endoplasmic reticulum	34	0.0389	0.00323216	Bt.869.1.S1_at, Bt.11465.1.S1_at, Bt.714.1.S1_at, Bt.5000.1.S1_at, Bt.5434.1.S1_at, Bt.14103.1.A1_at, Bt.23387.1.A1_at, Bt.26712.1.S1_at, Bt.20383.1.S1_at, Bt.23103.1.S1_at, Bt.5134.1.S1_at, Bt.4434.1.A1_at, Bt.5397.1.S1_at, Bt.4273.1.S1_at, Bt.29939.1.S1_at, Bt.29939.2.S1_at, Bt.3080.1.S1_a_at, Bt.6289.1.S1_at, Bt.7157.1.S1_at, Bt.19709.1.S1_at, Bt.16079.1.S1_at, Bt.5449.1.S1_at, Bt.4986.1.S1_at…	0.836826	0.0394868	4.62582
GOTERM_CC_ALL	GO:0044432~endoplasmic reticulum part	20	0.0229	0.0161095	Bt.19709.1.S1_at, Bt.16079.1.S1_at, Bt.5449.1.S1_at, Bt.869.1.S1_at, Bt.11465.1.S1_at, Bt.4986.1.S1_at, Bt.24676.2.A1_at, Bt.9026.1.S1_at, Bt.714.1.S1_at, Bt.23128.2.A1_at, Bt.5434.1.S1_at, Bt.5134.1.S1_at, Bt.4434.1.A1_at, Bt.13218.2.S1_at, Bt.4273.1.S1_at, Bt.29939.1.S1_at, Bt.29939.2.S1_at, Bt.3080.1.S1_a_at, Bt.4798.1.S2_at, Bt.23589.3.A1_a_at, Bt.7343.1.A1_at, Bt.1214.1.S1_at, Bt.6289.1.S1_a…	0.999888	0.136438	21.148
GOTERM_CC_ALL	GO:0042175~nuclear envelope-endoplasmic reticulum network	17	0.0195	0.0269371	Bt.19709.1.S1_at, Bt.16079.1.S1_at, Bt.869.1.S1_at, Bt.11465.1.S1_at, Bt.5449.1.S1_at, Bt.4986.1.S1_at, Bt.24676.2.A1_at, Bt.9026.1.S1_at, Bt.714.1.S1_at, Bt.5434.1.S1_at, Bt.5134.1.S1_at, Bt.4434.1.A1_at, Bt.13218.2.S1_at, Bt.23589.3.A1_a_at, Bt.7343.1.A1_at, Bt.1214.1.S1_at, Bt.4798.1.S2_at, Bt.6289.1.S1_at, Bt.7288.1.S1_at, Bt.13553.2.S1_a_at, Bt.13553.1.S1_at,	1	0.204062	32.9337
GOTERM_CC_ALL	GO:0005789~endoplasmic reticulum membrane	17	0.0195	0.0269371	Bt.19709.1.S1_at, Bt.16079.1.S1_at, Bt.869.1.S1_at, Bt.11465.1.S1_at, Bt.5449.1.S1_at, Bt.4986.1.S1_at, Bt.24676.2.A1_at, Bt.9026.1.S1_at, Bt.714.1.S1_at, Bt.5434.1.S1_at, Bt.5134.1.S1_at, Bt.4434.1.A1_at, Bt.13218.2.S1_at, Bt.23589.3.A1_a_at, Bt.7343.1.A1_at, Bt.1214.1.S1_at, Bt.4798.1.S2_at, Bt.6289.1.S1_at, Bt.7288.1.S1_at, Bt.13553.2.S1_a_at, Bt.13553.1.S1_at,	1	0.204062	32.9337
GOTERM_CC_ALL	GO:0012505~endomembrane system	31	0.0355	0.0274785	Bt.21493.1.S1_at, Bt.5049.1.S1_at, Bt.869.1.S1_at, Bt.11465.1.S1_at, Bt.714.1.S1_at, Bt.24256.1.S1_at, Bt.5000.1.S1_at, Bt.5434.1.S1_at, Bt.23103.1.S1_at, Bt.5134.1.S1_at, Bt.4434.1.A1_at, Bt.7157.1.S1_at, Bt.6289.1.S1_at, Bt.19709.1.S1_at, Bt.16079.1.S1_at, Bt.5449.1.S1_at, Bt.4986.1.S1_at, Bt.24676.2.A1_at, Bt.29281.1.S1_at, Bt.9026.1.S1_at, Bt.5150.1.S1_at, Bt.23205.1.S1_s_at, Bt.927.1.S1_at, …	1	0.20239	33.4775
SP_PIR_KEYWORDS	endoplasmic reticulum	21	0.0241	0.0336304	Bt.19709.1.S1_at, Bt.5449.1.S1_at, Bt.4986.1.S1_at, Bt.24676.2.A1_at, Bt.9026.1.S1_at, Bt.714.1.S1_at, Bt.5000.1.S1_at, Bt.5434.1.S1_at, Bt.621.1.S1_at, Bt.14103.1.A1_at, Bt.23387.1.A1_at, Bt.26712.1.S1_at, Bt.20383.1.S1_at, Bt.23103.1.S1_at, Bt.5397.1.S1_at, Bt.5134.1.S1_at, Bt.4434.1.A1_at, Bt.13218.2.S1_at, Bt.24660.1.S1_at, Bt.3080.1.S1_a_at, Bt.4798.1.S2_at, Bt.23589.3.A1_a_at, Bt.7343.1.A1_…	1	0.619801	40.5039
Functional Group 16	Median: 0.008410922691191237	Geo: 0.018366545263187126	Bt.222.1.S1_at, Bt.12663.1.S1_at, Bt.9182.1.S1_at, Bt.8924.1.S1_at, Bt.927.1.S1_at, Bt.23608.1.S1_s_at, Bt.28009.1.A1_at,
Category	Term	Count	%	PValue	Genes	Bonferroni	Benjamini	FDR
GOTERM_CC_ALL	GO:0044449~contractile fiber part	6	0.0069	0.00566125	Bt.222.1.S1_at, Bt.12663.1.S1_at, Bt.9182.1.S1_at, Bt.8924.1.S1_at, Bt.927.1.S1_at, Bt.23608.1.S1_s_at, Bt.28009.1.A1_at,	0.958385	0.0654076	7.97022
GOTERM_CC_ALL	GO:0030017~sarcomere	6	0.0069	0.00566125	Bt.222.1.S1_at, Bt.12663.1.S1_at, Bt.9182.1.S1_at, Bt.8924.1.S1_at, Bt.927.1.S1_at, Bt.23608.1.S1_s_at, Bt.28009.1.A1_at,	0.958385	0.0654076	7.97022
GOTERM_CC_ALL	GO:0030016~myofibril	6	0.0069	0.00738309	Bt.222.1.S1_at, Bt.12663.1.S1_at, Bt.9182.1.S1_at, Bt.8924.1.S1_at, Bt.927.1.S1_at, Bt.23608.1.S1_s_at, Bt.28009.1.A1_at,	0.984234	0.0796464	10.2743
GOTERM_CC_ALL	GO:0043292~contractile fiber	6	0.0069	0.00943876	Bt.222.1.S1_at, Bt.12663.1.S1_at, Bt.9182.1.S1_at, Bt.8924.1.S1_at, Bt.927.1.S1_at, Bt.23608.1.S1_s_at, Bt.28009.1.A1_at,	0.995062	0.0936668	12.9548
GOTERM_CC_ALL	GO:0030018~Z disc	3	0.0034	0.108378	Bt.222.1.S1_at, Bt.12663.1.S1_at, Bt.23608.1.S1_s_at, Bt.28009.1.A1_at,	1	0.506347	81.3293
GOTERM_CC_ALL	GO:0031674~I band	3	0.0034	0.15858	Bt.222.1.S1_at, Bt.12663.1.S1_at, Bt.23608.1.S1_s_at, Bt.28009.1.A1_at,	1	0.623443	92.0025
Functional Group 17	Median: 0.045367892623435595	Geo: 0.018566851180014277	Bt.3137.1.S1_at, Bt.15668.1.S1_at, Bt.21766.2.S1_at, Bt.20931.1.S1_at, Bt.28037.1.S1_at, Bt.4791.1.S1_at, Bt.12896.1.S1_at, Bt.9603.1.A1_at, Bt.9603.2.S1_at, Bt.21433.2.S1_at, Bt.800.1.S1_at, Bt.29462.1.S1_at, Bt.10855.1.S1_at, Bt.4138.1.S1_a_at, Bt.2.1.S1_at, Bt.11171.1.S1_at, Bt.236.1.S1_at, Bt.21503.1.S1_at, Bt.8482.1.A1_at, Bt.4834.1.S1_at, Bt.18230.1.S1_a_at, Bt.2940.2.S1_at, Bt.20877.1.S1_a…
Category	Term	Count	%	PValue	Genes	Bonferroni	Benjamini	FDR
GOTERM_BP_ALL	GO:0007049~cell cycle	28	0.0321	0.000660958	Bt.3137.1.S1_at, Bt.15668.1.S1_at, Bt.21766.2.S1_at, Bt.20931.1.S1_at, Bt.28037.1.S1_at, Bt.4791.1.S1_at, Bt.12896.1.S1_at, Bt.9603.1.A1_at, Bt.9603.2.S1_at, Bt.21433.2.S1_at, Bt.800.1.S1_at, Bt.29462.1.S1_at, Bt.10855.1.S1_at, Bt.4138.1.S1_a_at, Bt.2.1.S1_at, Bt.11171.1.S1_at, Bt.236.1.S1_at, Bt.21503.1.S1_at, Bt.8482.1.A1_at, Bt.4834.1.S1_at, Bt.18230.1.S1_a_at, Bt.2940.2.S1_at, Bt.20877.1.S1_a…	0.889387	0.0664901	1.19718
GOTERM_BP_ALL	GO:0051301~cell division	14	0.016	0.000949075	Bt.19650.1.A1_at, Bt.29462.1.S1_at, Bt.2.1.S1_at, Bt.177.1.S1_at, Bt.15668.1.S1_at, Bt.21503.1.S1_at, Bt.20931.1.S1_at, Bt.20877.1.S1_at, Bt.28037.1.S1_at, Bt.2353.1.S1_at, Bt.20128.1.A1_at, Bt.9603.1.A1_at, Bt.9603.2.S1_at, Bt.21444.1.S1_at, Bt.24529.2.A1_at,	0.957656	0.0819076	1.71478
GOTERM_BP_ALL	GO:0000278~mitotic cell cycle	11	0.0126	0.0169625	Bt.15668.1.S1_at, Bt.29462.1.S1_at, Bt.20877.1.S1_at, Bt.28037.1.S1_at, Bt.20128.1.A1_at, Bt.2353.1.S1_at, Bt.3137.1.S1_at, Bt.2.1.S1_at, Bt.21444.1.S1_at, Bt.4641.1.S1_at, Bt.24529.2.A1_at,	1	0.461645	26.7755
GOTERM_BP_ALL	GO:0007067~mitosis	9	0.0103	0.0434044	Bt.15668.1.S1_at, Bt.29462.1.S1_at, Bt.20877.1.S1_at, Bt.28037.1.S1_at, Bt.20128.1.A1_at, Bt.2353.1.S1_at, Bt.2.1.S1_at, Bt.21444.1.S1_at, Bt.24529.2.A1_at,	1	0.679115	55.4397
GOTERM_BP_ALL	GO:0000087~M phase of mitotic cell cycle	9	0.0103	0.0473314	Bt.15668.1.S1_at, Bt.29462.1.S1_at, Bt.20877.1.S1_at, Bt.28037.1.S1_at, Bt.20128.1.A1_at, Bt.2353.1.S1_at, Bt.2.1.S1_at, Bt.21444.1.S1_at, Bt.24529.2.A1_at,	1	0.697611	58.6567
GOTERM_BP_ALL	GO:0022402~cell cycle process	17	0.0195	0.051854	Bt.29462.1.S1_at, Bt.4138.1.S1_a_at, Bt.3137.1.S1_at, Bt.2.1.S1_at, Bt.11171.1.S1_at, Bt.15668.1.S1_at, Bt.236.1.S1_at, Bt.21766.2.S1_at, Bt.4834.1.S1_at, Bt.20877.1.S1_at, Bt.28037.1.S1_at, Bt.20128.1.A1_at, Bt.2353.1.S1_at, Bt.9603.1.A1_at, Bt.9603.2.S1_at, Bt.21444.1.S1_at, Bt.4641.1.S1_at, Bt.24529.2.A1_at,	1	0.708096	62.0895
GOTERM_BP_ALL	GO:0000279~M phase	9	0.0103	0.093037	Bt.15668.1.S1_at, Bt.29462.1.S1_at, Bt.20877.1.S1_at, Bt.28037.1.S1_at, Bt.20128.1.A1_at, Bt.2353.1.S1_at, Bt.2.1.S1_at, Bt.21444.1.S1_at, Bt.24529.2.A1_at,	1	0.847363	83.1169
GOTERM_BP_ALL	GO:0022403~cell cycle phase	9	0.0103	0.133912	Bt.15668.1.S1_at, Bt.29462.1.S1_at, Bt.20877.1.S1_at, Bt.28037.1.S1_at, Bt.20128.1.A1_at, Bt.2353.1.S1_at, Bt.2.1.S1_at, Bt.21444.1.S1_at, Bt.24529.2.A1_at,	1	0.915228	92.7116
Functional Group 18	Median: 0.015029993391446637	Geo: 0.019936178892574215	Bt.5218.1.S1_at, Bt.9657.1.S1_at, Bt.17036.1.A1_s_at, Bt.9756.1.S1_at, Bt.1316.1.S1_at, Bt.1316.1.S2_at, Bt.1792.1.S1_at, Bt.8624.1.S1_at, Bt.5885.1.S1_at, Bt.7157.1.S1_at, Bt.3277.1.S1_at, Bt.4599.1.S1_at, Bt.436.1.S1_at, Bt.8421.1.A1_at, Bt.2723.1.A1_at, Bt.29570.1.S1_at, Bt.20141.1.S1_at, Bt.12885.1.S1_at, Bt.16068.1.A1_at, Bt.22854.2.S1_at, Bt.20193.1.S1_at, Bt.9153.1.S1_at, Bt.13134.1.A1_at,…
Category	Term	Count	%	PValue	Genes	Bonferroni	Benjamini	FDR
GOTERM_BP_ALL	GO:0006082~organic acid metabolic process	28	0.0321	0.00867718	Bt.5218.1.S1_at, Bt.9657.1.S1_at, Bt.17036.1.A1_s_at, Bt.9756.1.S1_at, Bt.1316.1.S1_at, Bt.1316.1.S2_at, Bt.1792.1.S1_at, Bt.8624.1.S1_at, Bt.5885.1.S1_at, Bt.7157.1.S1_at, Bt.3277.1.S1_at, Bt.4599.1.S1_at, Bt.436.1.S1_at, Bt.8421.1.A1_at, Bt.2723.1.A1_at, Bt.29570.1.S1_at, Bt.20141.1.S1_at, Bt.12885.1.S1_at, Bt.16068.1.A1_at, Bt.22854.2.S1_at, Bt.20193.1.S1_at, Bt.9153.1.S1_at, Bt.13134.1.A1_at,…	1	0.355779	14.6793
GOTERM_BP_ALL	GO:0019752~carboxylic acid metabolic process	28	0.0321	0.00867718	Bt.5218.1.S1_at, Bt.9657.1.S1_at, Bt.17036.1.A1_s_at, Bt.9756.1.S1_at, Bt.1316.1.S1_at, Bt.1316.1.S2_at, Bt.1792.1.S1_at, Bt.8624.1.S1_at, Bt.5885.1.S1_at, Bt.7157.1.S1_at, Bt.3277.1.S1_at, Bt.4599.1.S1_at, Bt.436.1.S1_at, Bt.8421.1.A1_at, Bt.2723.1.A1_at, Bt.29570.1.S1_at, Bt.20141.1.S1_at, Bt.12885.1.S1_at, Bt.16068.1.A1_at, Bt.22854.2.S1_at, Bt.20193.1.S1_at, Bt.9153.1.S1_at, Bt.13134.1.A1_at,…	1	0.355779	14.6793
GOTERM_BP_ALL	GO:0006807~nitrogen compound metabolic process	23	0.0263	0.0120792	Bt.23179.1.S1_at, Bt.23179.1.S2_at, Bt.436.1.S1_at, Bt.8421.1.A1_at, Bt.17036.1.A1_s_at, Bt.9657.1.S1_at, Bt.5131.1.S1_at, Bt.2723.1.A1_at, Bt.20141.1.S1_at, Bt.16068.1.A1_at, Bt.12885.1.S1_at, Bt.20193.1.S1_at, Bt.1552.1.S1_at, Bt.8479.1.A1_at, Bt.27064.1.A1_at, Bt.9153.1.S1_at, Bt.13134.1.A1_at, Bt.13134.1.S1_at, Bt.1316.1.S1_at, Bt.1316.1.S2_at, Bt.4834.1.S1_at, Bt.8624.1.S1_at, Bt.22532.2.S1_…	1	0.389525	19.8583
GOTERM_BP_ALL	GO:0006519~amino acid and derivative metabolic process	20	0.0229	0.01503	Bt.436.1.S1_at, Bt.8421.1.A1_at, Bt.9657.1.S1_at, Bt.17036.1.A1_s_at, Bt.2723.1.A1_at, Bt.20141.1.S1_at, Bt.16068.1.A1_at, Bt.12885.1.S1_at, Bt.20193.1.S1_at, Bt.1552.1.S1_at, Bt.27064.1.A1_at, Bt.9153.1.S1_at, Bt.13134.1.A1_at, Bt.13134.1.S1_at, Bt.1316.1.S1_at, Bt.1316.1.S2_at, Bt.4834.1.S1_at, Bt.8624.1.S1_at, Bt.22532.2.S1_at, Bt.21918.2.S1_at, Bt.22574.1.S1_at, Bt.3080.1.S1_a_at, Bt.3277.1.S…	1	0.42898	24.1084
GOTERM_BP_ALL	GO:0009308~amine metabolic process	21	0.0241	0.0197371	Bt.436.1.S1_at, Bt.8421.1.A1_at, Bt.17036.1.A1_s_at, Bt.9657.1.S1_at, Bt.5131.1.S1_at, Bt.2723.1.A1_at, Bt.20141.1.S1_at, Bt.16068.1.A1_at, Bt.12885.1.S1_at, Bt.20193.1.S1_at, Bt.1552.1.S1_at, Bt.27064.1.A1_at, Bt.9153.1.S1_at, Bt.13134.1.A1_at, Bt.13134.1.S1_at, Bt.1316.1.S1_at, Bt.1316.1.S2_at, Bt.4834.1.S1_at, Bt.8624.1.S1_at, Bt.22532.2.S1_at, Bt.21918.2.S1_at, Bt.22574.1.S1_at, Bt.3080.1.S1_…	1	0.481723	30.4501
GOTERM_BP_ALL	GO:0006520~amino acid metabolic process	17	0.0195	0.0209573	Bt.436.1.S1_at, Bt.8421.1.A1_at, Bt.9657.1.S1_at, Bt.17036.1.A1_s_at, Bt.2723.1.A1_at, Bt.20141.1.S1_at, Bt.12885.1.S1_at, Bt.16068.1.A1_at, Bt.20193.1.S1_at, Bt.1552.1.S1_at, Bt.27064.1.A1_at, Bt.9153.1.S1_at, Bt.13134.1.A1_at, Bt.13134.1.S1_at, Bt.1316.1.S1_at, Bt.1316.1.S2_at, Bt.4834.1.S1_at, Bt.8624.1.S1_at, Bt.21918.2.S1_at, Bt.22532.2.S1_at, Bt.3277.1.S1_at,	1	0.489165	32.0104
GOTERM_BP_ALL	GO:0032787~monocarboxylic acid metabolic process	10	0.0115	0.221371	Bt.5218.1.S1_at, Bt.13324.4.S1_at, Bt.13324.1.S1_a_at, Bt.1792.1.S1_at, Bt.6143.1.S1_at, Bt.29570.1.S1_at, Bt.5885.1.S1_at, Bt.4798.1.S2_at, Bt.22854.2.S1_at, Bt.7157.1.S1_at, Bt.4599.1.S1_at,	1	0.973711	98.9517
Functional Group 19	Median: 0.02468470807514351	Geo: 0.020104836305518216	Bt.2891.1.S1_at, Bt.7225.1.S1_at, Bt.4035.1.S1_at, Bt.23254.1.S1_at, Bt.23179.1.S1_at, Bt.23179.1.S2_at,
Category	Term	Count	%	PValue	Genes	Bonferroni	Benjamini	FDR
SMART	SM00101:14_3_3	4	0.0046	0.00790594	Bt.2891.1.S1_at, Bt.7225.1.S1_at, Bt.4035.1.S1_at, Bt.23254.1.S1_at,	0.980492	0.980492	10.7896
INTERPRO	IPR000308:14-3-3 protein	4	0.0046	0.0203635	Bt.2891.1.S1_at, Bt.7225.1.S1_at, Bt.4035.1.S1_at, Bt.23254.1.S1_at,	1	0.999999	31.2899
GOTERM_MF_ALL	GO:0019904~protein domain specific binding	5	0.0057	0.0290059	Bt.23179.1.S1_at, Bt.23179.1.S2_at, Bt.2891.1.S1_at, Bt.7225.1.S1_at, Bt.4035.1.S1_at, Bt.23254.1.S1_at,	1	0.743689	39.4362
PIR_SUPERFAMILY	PIRSF000868:14-3-3 protein	4	0.0046	0.0349872	Bt.2891.1.S1_at, Bt.7225.1.S1_at, Bt.4035.1.S1_at, Bt.23254.1.S1_at,	1	1	44.4712
Functional Group 20	Median: 0.02444549103517861	Geo: 0.0202102074082646	Bt.2573.1.S1_at, Bt.5141.1.S1_at, Bt.5141.1.S2_at, Bt.13220.1.S1_at, Bt.4314.1.S1_at, Bt.58.1.S1_at, Bt.18325.1.A1_at, Bt.18325.2.A1_a_at, Bt.7648.1.S1_at, Bt.3137.1.S1_at, Bt.177.1.S1_at, Bt.1794.1.S1_a_at, Bt.3050.1.S1_at, Bt.21766.2.S1_at, Bt.5334.1.S1_at, Bt.6438.1.A1_at, Bt.2632.1.S1_at, Bt.222.1.S1_at, Bt.12663.1.S1_at, Bt.13744.1.A1_at, Bt.4816.1.S1_at, Bt.7236.1.S1_at, Bt.5449.1.S1_at, Bt…
Category	Term	Count	%	PValue	Genes	Bonferroni	Benjamini	FDR
GOTERM_BP_ALL	GO:0048731~system development	34	0.0389	0.00351415	Bt.2573.1.S1_at, Bt.5141.1.S1_at, Bt.5141.1.S2_at, Bt.13220.1.S1_at, Bt.4314.1.S1_at, Bt.58.1.S1_at, Bt.18325.1.A1_at, Bt.18325.2.A1_a_at, Bt.7648.1.S1_at, Bt.3137.1.S1_at, Bt.177.1.S1_at, Bt.1794.1.S1_a_at, Bt.3050.1.S1_at, Bt.21766.2.S1_at, Bt.5334.1.S1_at, Bt.6438.1.A1_at, Bt.2632.1.S1_at, Bt.222.1.S1_at, Bt.12663.1.S1_at, Bt.13744.1.A1_at, Bt.4816.1.S1_at, Bt.7236.1.S1_at, Bt.5449.1.S1_at, Bt…	0.999992	0.205353	6.21136
GOTERM_BP_ALL	GO:0048856~anatomical structure development	40	0.0458	0.00449425	Bt.2573.1.S1_at, Bt.5141.1.S1_at, Bt.5141.1.S2_at, Bt.13220.1.S1_at, Bt.4314.1.S1_at, Bt.1854.1.S1_at, Bt.58.1.S1_at, Bt.18325.1.A1_at, Bt.18325.2.A1_a_at, Bt.7648.1.S1_at, Bt.3137.1.S1_at, Bt.177.1.S1_at, Bt.1794.1.S1_a_at, Bt.3050.1.S1_at, Bt.21766.2.S1_at, Bt.5334.1.S1_at, Bt.6438.1.A1_at, Bt.2632.1.S1_at, Bt.222.1.S1_at, Bt.12663.1.S1_at, Bt.13744.1.A1_at, Bt.4816.1.S1_at, Bt.7236.1.S1_at, Bt…	1	0.250578	7.87756
GOTERM_BP_ALL	GO:0048519~negative regulation of biological process	30	0.0344	0.00594495	Bt.2573.1.S1_at, Bt.20455.1.S1_at, Bt.5141.1.S1_at, Bt.5141.1.S2_at, Bt.13220.1.S1_at, Bt.4314.1.S1_at, Bt.499.1.S1_a_at, Bt.177.1.S1_at, Bt.1794.1.S1_a_at, Bt.6438.1.A1_at, Bt.11189.1.S1_at, Bt.21766.2.S1_at, Bt.4619.1.S1_at, Bt.222.1.S1_at, Bt.5006.1.S1_at, Bt.742.1.S2_at, Bt.4816.1.S1_at, Bt.7236.1.S1_at, Bt.10855.1.S1_at, Bt.16068.1.A1_at, Bt.2.1.S1_at, Bt.11171.1.S1_at, Bt.1747.1.S1_at, Bt.9…	1	0.294146	10.2925
GOTERM_BP_ALL	GO:0048468~cell development	33	0.0378	0.00637311	Bt.11710.1.S1_at, Bt.21493.1.S1_at, Bt.5141.1.S1_at, Bt.5141.1.S2_at, Bt.499.1.S1_a_at, Bt.5434.1.S1_at, Bt.177.1.S1_at, Bt.15668.1.S1_at, Bt.3050.1.S1_at, Bt.6438.1.A1_at, Bt.222.1.S1_at, Bt.3960.2.S1_at, Bt.3960.1.S1_a_at, Bt.12663.1.S1_at, Bt.504.1.S1_at, Bt.4816.1.S1_at, Bt.7236.1.S1_at, Bt.16079.1.S1_at, Bt.4150.1.S1_at, Bt.26339.1.A1_at, Bt.4138.1.S1_a_at, Bt.4775.1.S1_at, Bt.5517.1.S2_at, …	1	0.294623	10.9938
GOTERM_BP_ALL	GO:0048513~organ development	28	0.0321	0.00779742	Bt.5141.1.S1_at, Bt.5141.1.S2_at, Bt.4314.1.S1_at, Bt.13220.1.S1_at, Bt.58.1.S1_at, Bt.18325.1.A1_at, Bt.18325.2.A1_a_at, Bt.7648.1.S1_at, Bt.177.1.S1_at, Bt.1794.1.S1_a_at, Bt.3050.1.S1_at, Bt.5334.1.S1_at, Bt.6438.1.A1_at, Bt.21766.2.S1_at, Bt.2632.1.S1_at, Bt.222.1.S1_at, Bt.13744.1.A1_at, Bt.12663.1.S1_at, Bt.4816.1.S1_at, Bt.7236.1.S1_at, Bt.5449.1.S1_at, Bt.234.1.S1_at, Bt.4138.1.S1_a_at, B…	1	0.334555	13.2894
GOTERM_BP_ALL	GO:0048523~negative regulation of cellular process	28	0.0321	0.00822763	Bt.2573.1.S1_at, Bt.20455.1.S1_at, Bt.5141.1.S1_at, Bt.5141.1.S2_at, Bt.13220.1.S1_at, Bt.499.1.S1_a_at, Bt.177.1.S1_at, Bt.1794.1.S1_a_at, Bt.6438.1.A1_at, Bt.11189.1.S1_at, Bt.21766.2.S1_at, Bt.4619.1.S1_at, Bt.222.1.S1_at, Bt.5006.1.S1_at, Bt.742.1.S2_at, Bt.4816.1.S1_at, Bt.7236.1.S1_at, Bt.10855.1.S1_at, Bt.2.1.S1_at, Bt.16068.1.A1_at, Bt.11171.1.S1_at, Bt.1747.1.S1_at, Bt.9153.1.S1_at, Bt.1…	1	0.345086	13.9717
GOTERM_BP_ALL	GO:0007275~multicellular organismal development	45	0.0515	0.0113871	Bt.2573.1.S1_at, Bt.12429.1.S1_at, Bt.5141.1.S1_at, Bt.5141.1.S2_at, Bt.13220.1.S1_at, Bt.4314.1.S1_at, Bt.58.1.S1_at, Bt.18325.1.A1_at, Bt.18325.2.A1_a_at, Bt.7648.1.S1_at, Bt.3137.1.S1_at, Bt.4797.1.S1_at, Bt.177.1.S1_at, Bt.1794.1.S1_a_at, Bt.3050.1.S1_at, Bt.21766.2.S1_at, Bt.5334.1.S1_at, Bt.6438.1.A1_at, Bt.2632.1.S1_at, Bt.222.1.S1_at, Bt.9972.1.S1_at, Bt.12663.1.S1_at, Bt.13744.1.A1_at, B…	1	0.382911	18.8294
GOTERM_BP_ALL	GO:0006916~anti-apoptosis	8	0.0092	0.0135807	Bt.222.1.S1_at, Bt.2353.1.S1_at, Bt.499.1.S1_a_at, Bt.16068.1.A1_at, Bt.2.1.S1_at, Bt.177.1.S1_at, Bt.1747.1.S1_at, Bt.4641.1.S1_at,	1	0.403949	22.0484
GOTERM_BP_ALL	GO:0016265~death	26	0.0298	0.0170065	Bt.11710.1.S1_at, Bt.5141.1.S1_at, Bt.5141.1.S2_at, Bt.21493.1.S1_at, Bt.499.1.S1_a_at, Bt.5434.1.S1_at, Bt.177.1.S1_at, Bt.15668.1.S1_at, Bt.6438.1.A1_at, Bt.222.1.S1_at, Bt.3960.2.S1_at, Bt.3960.1.S1_a_at, Bt.504.1.S1_at, Bt.4816.1.S1_at, Bt.7236.1.S1_at, Bt.16079.1.S1_at, Bt.4150.1.S1_at, Bt.26339.1.A1_at, Bt.4775.1.S1_at, Bt.2.1.S1_at, Bt.16068.1.A1_at, Bt.1747.1.S1_at, Bt.12504.1.S1_at, Bt.4…	1	0.455369	26.8352
GOTERM_BP_ALL	GO:0008219~cell death	26	0.0298	0.0170065	Bt.11710.1.S1_at, Bt.5141.1.S1_at, Bt.5141.1.S2_at, Bt.21493.1.S1_at, Bt.499.1.S1_a_at, Bt.5434.1.S1_at, Bt.177.1.S1_at, Bt.15668.1.S1_at, Bt.6438.1.A1_at, Bt.222.1.S1_at, Bt.3960.2.S1_at, Bt.3960.1.S1_a_at, Bt.504.1.S1_at, Bt.4816.1.S1_at, Bt.7236.1.S1_at, Bt.16079.1.S1_at, Bt.4150.1.S1_at, Bt.26339.1.A1_at, Bt.4775.1.S1_at, Bt.2.1.S1_at, Bt.16068.1.A1_at, Bt.1747.1.S1_at, Bt.12504.1.S1_at, Bt.4…	1	0.455369	26.8352
GOTERM_BP_ALL	GO:0012501~programmed cell death	24	0.0275	0.0244455	Bt.4816.1.S1_at, Bt.11710.1.S1_at, Bt.7236.1.S1_at, Bt.21493.1.S1_at, Bt.5141.1.S1_at, Bt.5141.1.S2_at, Bt.16079.1.S1_at, Bt.4150.1.S1_at, Bt.26339.1.A1_at, Bt.4775.1.S1_at, Bt.499.1.S1_a_at, Bt.16068.1.A1_at, Bt.2.1.S1_at, Bt.5434.1.S1_at, Bt.177.1.S1_at, Bt.1747.1.S1_at, Bt.15668.1.S1_at, Bt.6438.1.A1_at, Bt.4834.1.S1_at, Bt.8724.1.S1_at, Bt.222.1.S1_at, Bt.3960.2.S1_at, Bt.3960.1.S1_a_at, Bt.2…	1	0.533782	36.2902
GOTERM_BP_ALL	GO:0048869~cellular developmental process	41	0.047	0.0253171	Bt.11710.1.S1_at, Bt.12429.1.S1_at, Bt.21493.1.S1_at, Bt.5141.1.S1_at, Bt.5141.1.S2_at, Bt.18325.1.A1_at, Bt.18325.2.A1_a_at, Bt.7648.1.S1_at, Bt.499.1.S1_a_at, Bt.3137.1.S1_at, Bt.5434.1.S1_at, Bt.177.1.S1_at, Bt.15668.1.S1_at, Bt.3050.1.S1_at, Bt.21766.2.S1_at, Bt.6438.1.A1_at, Bt.222.1.S1_at, Bt.3960.2.S1_at, Bt.3960.1.S1_a_at, Bt.12663.1.S1_at, Bt.28119.1.S1_at, Bt.504.1.S1_at, Bt.4816.1.S1_a…	1	0.543154	37.3191
GOTERM_BP_ALL	GO:0030154~cell differentiation	41	0.047	0.0253171	Bt.11710.1.S1_at, Bt.12429.1.S1_at, Bt.21493.1.S1_at, Bt.5141.1.S1_at, Bt.5141.1.S2_at, Bt.18325.1.A1_at, Bt.18325.2.A1_a_at, Bt.7648.1.S1_at, Bt.499.1.S1_a_at, Bt.3137.1.S1_at, Bt.5434.1.S1_at, Bt.177.1.S1_at, Bt.15668.1.S1_at, Bt.3050.1.S1_at, Bt.21766.2.S1_at, Bt.6438.1.A1_at, Bt.222.1.S1_at, Bt.3960.2.S1_at, Bt.3960.1.S1_a_at, Bt.12663.1.S1_at, Bt.28119.1.S1_at, Bt.504.1.S1_at, Bt.4816.1.S1_a…	1	0.543154	37.3191
GOTERM_BP_ALL	GO:0032502~developmental process	61	0.0699	0.0255671	Bt.2573.1.S1_at, Bt.12429.1.S1_at, Bt.13220.1.S1_at, Bt.4314.1.S1_at, Bt.58.1.S1_at, Bt.1794.1.S1_a_at, Bt.3050.1.S1_at, Bt.6438.1.A1_at, Bt.21766.2.S1_at, Bt.222.1.S1_at, Bt.3960.2.S1_at, Bt.3960.1.S1_a_at, Bt.7236.1.S1_at, Bt.4150.1.S1_at, Bt.234.1.S1_at, Bt.26339.1.A1_at, Bt.12631.3.S1_at, Bt.4138.1.S1_a_at, Bt.2.1.S1_at, Bt.1747.1.S1_at, Bt.4834.1.S1_at, Bt.8724.1.S1_at, Bt.8131.1.S1_at, Bt.2…	1	0.537011	37.6114
GOTERM_BP_ALL	GO:0006915~apoptosis	23	0.0263	0.0385247	Bt.4816.1.S1_at, Bt.11710.1.S1_at, Bt.7236.1.S1_at, Bt.21493.1.S1_at, Bt.5141.1.S1_at, Bt.5141.1.S2_at, Bt.16079.1.S1_at, Bt.4150.1.S1_at, Bt.26339.1.A1_at, Bt.4775.1.S1_at, Bt.499.1.S1_a_at, Bt.16068.1.A1_at, Bt.2.1.S1_at, Bt.5434.1.S1_at, Bt.177.1.S1_at, Bt.1747.1.S1_at, Bt.15668.1.S1_at, Bt.6438.1.A1_at, Bt.8724.1.S1_at, Bt.222.1.S1_at, Bt.3960.2.S1_at, Bt.3960.1.S1_a_at, Bt.2353.1.S1_at, Bt.5…	1	0.651818	51.1121
GOTERM_BP_ALL	GO:0043066~negative regulation of apoptosis	10	0.0115	0.0386227	Bt.4816.1.S1_at, Bt.7236.1.S1_at, Bt.222.1.S1_at, Bt.2353.1.S1_at, Bt.499.1.S1_a_at, Bt.16068.1.A1_at, Bt.2.1.S1_at, Bt.177.1.S1_at, Bt.1747.1.S1_at, Bt.4641.1.S1_at,	1	0.649819	51.2028
GOTERM_BP_ALL	GO:0043069~negative regulation of programmed cell death	10	0.0115	0.0419268	Bt.4816.1.S1_at, Bt.7236.1.S1_at, Bt.222.1.S1_at, Bt.2353.1.S1_at, Bt.499.1.S1_a_at, Bt.16068.1.A1_at, Bt.2.1.S1_at, Bt.177.1.S1_at, Bt.1747.1.S1_at, Bt.4641.1.S1_at,	1	0.669001	54.169
GOTERM_BP_ALL	GO:0043067~regulation of programmed cell death	16	0.0183	0.0723245	Bt.4816.1.S1_at, Bt.7236.1.S1_at, Bt.5141.1.S1_at, Bt.5141.1.S2_at, Bt.499.1.S1_a_at, Bt.4775.1.S1_at, Bt.16068.1.A1_at, Bt.2.1.S1_at, Bt.177.1.S1_at, Bt.1747.1.S1_at, Bt.6438.1.A1_at, Bt.4834.1.S1_at, Bt.8724.1.S1_at, Bt.222.1.S1_at, Bt.2353.1.S1_at, Bt.504.1.S1_at, Bt.4641.1.S1_at,	1	0.79243	74.5265
GOTERM_BP_ALL	GO:0032501~multicellular organismal process	57	0.0653	0.0731758	Bt.2573.1.S1_at, Bt.12429.1.S1_at, Bt.13220.1.S1_at, Bt.4314.1.S1_at, Bt.58.1.S1_at, Bt.4557.1.S1_at, Bt.1794.1.S1_a_at, Bt.3050.1.S1_at, Bt.6438.1.A1_at, Bt.21766.2.S1_at, Bt.222.1.S1_at, Bt.7236.1.S1_at, Bt.234.1.S1_at, Bt.26339.1.A1_at, Bt.12631.3.S1_at, Bt.4138.1.S1_a_at, Bt.23205.1.S1_s_at, Bt.1747.1.S1_at, Bt.5478.1.S1_at, Bt.4834.1.S1_at, Bt.8131.1.S1_at, Bt.24887.1.S1_at, Bt.983.1.S1_at, …	1	0.794348	74.949
GOTERM_BP_ALL	GO:0009653~anatomical structure morphogenesis	21	0.0241	0.10153	Bt.2573.1.S1_at, Bt.4816.1.S1_at, Bt.5141.1.S1_at, Bt.5141.1.S2_at, Bt.13220.1.S1_at, Bt.4314.1.S1_at, Bt.234.1.S1_at, Bt.1854.1.S1_at, Bt.4775.1.S1_at, Bt.4138.1.S1_a_at, Bt.5517.1.S2_at, Bt.16068.1.A1_at, Bt.177.1.S1_at, Bt.1747.1.S1_at, Bt.9153.1.S1_at, Bt.13134.1.A1_at, Bt.13134.1.S1_at, Bt.6438.1.A1_at, Bt.3583.1.S1_at, Bt.4834.1.S1_at, Bt.18808.1.S1_at, Bt.8131.1.S1_at, Bt.4641.1.S1_at, Bt.…	1	0.865057	85.776
GOTERM_BP_ALL	GO:0042981~regulation of apoptosis	15	0.0172	0.113289	Bt.4816.1.S1_at, Bt.7236.1.S1_at, Bt.5141.1.S1_at, Bt.5141.1.S2_at, Bt.499.1.S1_a_at, Bt.4775.1.S1_at, Bt.16068.1.A1_at, Bt.2.1.S1_at, Bt.177.1.S1_at, Bt.1747.1.S1_at, Bt.6438.1.A1_at, Bt.8724.1.S1_at, Bt.222.1.S1_at, Bt.2353.1.S1_at, Bt.504.1.S1_at, Bt.4641.1.S1_at,	1	0.885163	88.8107
Functional Group 21	Median: 0.03690438336962277	Geo: 0.026118554873827627	Bt.17036.1.A1_s_at, Bt.9023.1.S1_at, Bt.24270.1.S1_at, Bt.1.1.S1_at, Bt.7194.1.S1_at, Bt.12743.1.A1_at, Bt.12365.1.S1_at, Bt.4322.1.A1_at, Bt.4273.1.S1_at, Bt.29939.1.S1_at, Bt.29939.2.S1_at, Bt.15851.1.S1_at, Bt.28515.1.A1_at, Bt.29857.1.A1_at, Bt.29857.1.S1_at, Bt.8706.1.S1_at, Bt.5154.1.S1_at, Bt.5154.1.S1_s_at, Bt.23179.1.S1_at, Bt.23179.1.S2_at, Bt.27347.1.A1_at, Bt.24017.1.A1_s_at, Bt.4756.…
Category	Term	Count	%	PValue	Genes	Bonferroni	Benjamini	FDR
SP_PIR_KEYWORDS	atp-binding	39	0.0447	0.00292101	Bt.17036.1.A1_s_at, Bt.9023.1.S1_at, Bt.24270.1.S1_at, Bt.1.1.S1_at, Bt.7194.1.S1_at, Bt.12743.1.A1_at, Bt.12365.1.S1_at, Bt.4322.1.A1_at, Bt.4273.1.S1_at, Bt.29939.1.S1_at, Bt.29939.2.S1_at, Bt.15851.1.S1_at, Bt.28515.1.A1_at, Bt.29857.1.A1_at, Bt.29857.1.S1_at, Bt.8706.1.S1_at, Bt.5154.1.S1_at, Bt.5154.1.S1_s_at, Bt.23179.1.S1_at, Bt.23179.1.S2_at, Bt.27347.1.A1_at, Bt.24017.1.A1_s_at, Bt.4756.…	0.883526	0.193466	4.34318
SP_PIR_KEYWORDS	nucleotide-binding	50	0.0573	0.0076825	Bt.27901.1.S1_at, Bt.6819.1.S1_at, Bt.7323.1.S1_at, Bt.1.1.S1_at, Bt.7194.1.S1_at, Bt.12743.1.A1_at, Bt.4322.1.A1_at, Bt.4273.1.S1_at, Bt.29939.1.S1_at, Bt.29939.2.S1_at, Bt.15851.1.S1_at, Bt.2898.3.S1_at, Bt.8706.1.S1_at, Bt.28515.1.A1_at, Bt.29857.1.A1_at, Bt.29857.1.S1_at, Bt.23179.1.S1_at, Bt.23179.1.S2_at, Bt.24017.1.A1_s_at, Bt.4756.1.S1_at, Bt.5154.1.S1_at, Bt.5154.1.S1_s_at, Bt.12559.1.S1…	0.996547	0.332949	11.0471
GOTERM_MF_ALL	GO:0000166~nucleotide binding	101	0.1157	0.0122816	Bt.6819.1.S1_at, Bt.12198.1.S1_at, Bt.23170.1.S1_at, Bt.7194.1.S1_at, Bt.22359.3.S1_at, Bt.3050.1.S1_at, Bt.4791.1.S1_at, Bt.7641.2.S1_a_at, Bt.7641.1.S1_at, Bt.15851.1.S1_at, Bt.8706.1.S1_at, Bt.28515.1.A1_at, Bt.29857.1.A1_at, Bt.29857.1.S1_at, Bt.15996.1.S2_at, Bt.23179.1.S1_at, Bt.23179.1.S2_at, Bt.24017.1.A1_s_at, Bt.4756.1.S1_at, Bt.14218.1.S1_at, Bt.5154.1.S1_at, Bt.5154.1.S1_s_at, Bt.1255…	1	0.48952	18.9848
GOTERM_MF_ALL	GO:0032553~ribonucleotide binding	81	0.0928	0.0369044	Bt.27901.1.S1_at, Bt.6819.1.S1_at, Bt.19522.1.S1_at, Bt.7323.1.S1_at, Bt.1.1.S1_at, Bt.7194.1.S1_at, Bt.12743.1.A1_at, Bt.22359.3.S1_at, Bt.3050.1.S1_at, Bt.4322.1.A1_at, Bt.13859.1.S1_at, Bt.4791.1.S1_at, Bt.4273.1.S1_at, Bt.29939.1.S1_at, Bt.29939.2.S1_at, Bt.7641.2.S1_a_at, Bt.7641.1.S1_at, Bt.28064.2.S1_at, Bt.9929.1.A1_at, Bt.15851.1.S1_at, Bt.28515.1.A1_at, Bt.29857.1.A1_at, Bt.29857.1.S1_a…	1	0.794234	47.3036
GOTERM_MF_ALL	GO:0032555~purine ribonucleotide binding	81	0.0928	0.0369044	Bt.27901.1.S1_at, Bt.6819.1.S1_at, Bt.19522.1.S1_at, Bt.7323.1.S1_at, Bt.1.1.S1_at, Bt.7194.1.S1_at, Bt.12743.1.A1_at, Bt.22359.3.S1_at, Bt.3050.1.S1_at, Bt.4322.1.A1_at, Bt.13859.1.S1_at, Bt.4791.1.S1_at, Bt.4273.1.S1_at, Bt.29939.1.S1_at, Bt.29939.2.S1_at, Bt.7641.2.S1_a_at, Bt.7641.1.S1_at, Bt.28064.2.S1_at, Bt.9929.1.A1_at, Bt.15851.1.S1_at, Bt.28515.1.A1_at, Bt.29857.1.A1_at, Bt.29857.1.S1_a…	1	0.794234	47.3036
GOTERM_MF_ALL	GO:0017076~purine nucleotide binding	84	0.0962	0.0441095	Bt.27901.1.S1_at, Bt.6819.1.S1_at, Bt.19522.1.S1_at, Bt.7323.1.S1_at, Bt.1.1.S1_at, Bt.7194.1.S1_at, Bt.12743.1.A1_at, Bt.22359.3.S1_at, Bt.5534.1.S1_at, Bt.3050.1.S1_at, Bt.4322.1.A1_at, Bt.13859.1.S1_at, Bt.4791.1.S1_at, Bt.4273.1.S1_at, Bt.29939.1.S1_at, Bt.29939.2.S1_at, Bt.7641.2.S1_a_at, Bt.7641.1.S1_at, Bt.28064.2.S1_at, Bt.9929.1.A1_at, Bt.15851.1.S1_at, Bt.28515.1.A1_at, Bt.29857.1.A1_at…	1	0.811591	53.6319
GOTERM_MF_ALL	GO:0030554~adenyl nucleotide binding	68	0.0779	0.0622449	Bt.19522.1.S1_at, Bt.1.1.S1_at, Bt.7194.1.S1_at, Bt.12743.1.A1_at, Bt.22359.3.S1_at, Bt.5534.1.S1_at, Bt.3050.1.S1_at, Bt.4322.1.A1_at, Bt.13859.1.S1_at, Bt.4791.1.S1_at, Bt.4273.1.S1_at, Bt.29939.1.S1_at, Bt.29939.2.S1_at, Bt.7641.2.S1_a_at, Bt.7641.1.S1_at, Bt.15851.1.S1_at, Bt.28515.1.A1_at, Bt.29857.1.A1_at, Bt.29857.1.S1_at, Bt.8706.1.S1_at, Bt.15996.1.S2_at, Bt.23179.1.S1_at, Bt.23179.1.S2_…	1	0.871249	66.5422
GOTERM_MF_ALL	GO:0032559~adenyl ribonucleotide binding	65	0.0745	0.0623169	Bt.19522.1.S1_at, Bt.1.1.S1_at, Bt.7194.1.S1_at, Bt.12743.1.A1_at, Bt.22359.3.S1_at, Bt.3050.1.S1_at, Bt.4322.1.A1_at, Bt.13859.1.S1_at, Bt.4791.1.S1_at, Bt.4273.1.S1_at, Bt.29939.1.S1_at, Bt.29939.2.S1_at, Bt.7641.2.S1_a_at, Bt.7641.1.S1_at, Bt.15851.1.S1_at, Bt.28515.1.A1_at, Bt.29857.1.A1_at, Bt.29857.1.S1_at, Bt.8706.1.S1_at, Bt.15996.1.S2_at, Bt.23179.1.S1_at, Bt.23179.1.S2_at, Bt.14218.1.S1…	1	0.867018	66.586
GOTERM_MF_ALL	GO:0005524~ATP binding	63	0.0722	0.0880749	Bt.19522.1.S1_at, Bt.1.1.S1_at, Bt.7194.1.S1_at, Bt.12743.1.A1_at, Bt.22359.3.S1_at, Bt.3050.1.S1_at, Bt.4322.1.A1_at, Bt.13859.1.S1_at, Bt.4791.1.S1_at, Bt.4273.1.S1_at, Bt.29939.1.S1_at, Bt.29939.2.S1_at, Bt.7641.2.S1_a_at, Bt.7641.1.S1_at, Bt.15851.1.S1_at, Bt.28515.1.A1_at, Bt.29857.1.A1_at, Bt.29857.1.S1_at, Bt.8706.1.S1_at, Bt.23179.1.S1_at, Bt.23179.1.S2_at, Bt.14218.1.S1_at, Bt.24017.1.A1…	1	0.927494	79.2108
Functional Group 22	Median: 0.0432317966343172	Geo: 0.029910147743506695	Bt.15267.1.A1_at, Bt.1973.1.S1_at, Bt.24459.2.S1_at, Bt.6805.1.A1_at, Bt.5754.3.S1_at, Bt.21871.1.S1_a_at, Bt.23170.1.S1_at, Bt.23827.1.A1_at, Bt.5360.1.S1_a_at, Bt.4949.1.S1_at, Bt.9750.1.S1_a_at, Bt.5332.1.S1_at, Bt.5458.1.S1_at, Bt.2507.1.S1_at, Bt.5085.1.S1_at, Bt.20128.1.A1_at, Bt.24628.1.S1_at, Bt.23098.2.S1_at, Bt.4054.1.S1_at, Bt.11606.2.S1_at, Bt.27417.2.S1_at, Bt.19676.2.S1_a_at,
Category	Term	Count	%	PValue	Genes	Bonferroni	Benjamini	FDR
GOTERM_BP_ALL	GO:0016071~mRNA metabolic process	16	0.0183	0.00322567	Bt.15267.1.A1_at, Bt.1973.1.S1_at, Bt.24459.2.S1_at, Bt.6805.1.A1_at, Bt.5754.3.S1_at, Bt.21871.1.S1_a_at, Bt.23170.1.S1_at, Bt.23827.1.A1_at, Bt.5360.1.S1_a_at, Bt.4949.1.S1_at, Bt.9750.1.S1_a_at, Bt.5332.1.S1_at, Bt.5458.1.S1_at, Bt.2507.1.S1_at, Bt.5085.1.S1_at, Bt.20128.1.A1_at, Bt.24628.1.S1_at,	0.999979	0.200799	5.71554
GOTERM_BP_ALL	GO:0008380~RNA splicing	12	0.0137	0.0128417	Bt.4949.1.S1_at, Bt.15267.1.A1_at, Bt.9750.1.S1_a_at, Bt.5332.1.S1_at, Bt.1973.1.S1_at, Bt.5458.1.S1_at, Bt.6805.1.A1_at, Bt.5754.3.S1_at, Bt.2507.1.S1_at, Bt.23170.1.S1_at, Bt.20128.1.A1_at, Bt.23098.2.S1_at,	1	0.397309	20.9776
GOTERM_BP_ALL	GO:0006397~mRNA processing	13	0.0149	0.0196226	Bt.15267.1.A1_at, Bt.1973.1.S1_at, Bt.6805.1.A1_at, Bt.5754.3.S1_at, Bt.23170.1.S1_at, Bt.23827.1.A1_at, Bt.5360.1.S1_a_at, Bt.4949.1.S1_at, Bt.9750.1.S1_a_at, Bt.5332.1.S1_at, Bt.5458.1.S1_at, Bt.2507.1.S1_at, Bt.5085.1.S1_at, Bt.20128.1.A1_at,	1	0.486545	30.302
SP_PIR_KEYWORDS	spliceosome	7	0.008	0.0383078	Bt.4949.1.S1_at, Bt.9750.1.S1_a_at, Bt.1973.1.S1_at, Bt.4054.1.S1_at, Bt.5458.1.S1_at, Bt.5754.3.S1_at, Bt.23170.1.S1_at,	1	0.62842	44.7282
SP_PIR_KEYWORDS	mrna processing	10	0.0115	0.0481558	Bt.4949.1.S1_at, Bt.9750.1.S1_a_at, Bt.5332.1.S1_at, Bt.1973.1.S1_at, Bt.4054.1.S1_at, Bt.5458.1.S1_at, Bt.5754.3.S1_at, Bt.23170.1.S1_at, Bt.5085.1.S1_at, Bt.23827.1.A1_at, Bt.5360.1.S1_a_at,	1	0.689684	52.7231
GOTERM_CC_ALL	GO:0005681~spliceosome	8	0.0092	0.0709127	Bt.4949.1.S1_at, Bt.15267.1.A1_at, Bt.9750.1.S1_a_at, Bt.1973.1.S1_at, Bt.5458.1.S1_at, Bt.5754.3.S1_at, Bt.23170.1.S1_at, Bt.20128.1.A1_at,	1	0.39861	65.9063
SP_PIR_KEYWORDS	mrna splicing	8	0.0092	0.0767752	Bt.4949.1.S1_at, Bt.9750.1.S1_a_at, Bt.5332.1.S1_at, Bt.1973.1.S1_at, Bt.4054.1.S1_at, Bt.5458.1.S1_at, Bt.5754.3.S1_at, Bt.23170.1.S1_at,	1	0.804253	70.256
GOTERM_BP_ALL	GO:0006396~RNA processing	18	0.0206	0.0784637	Bt.15267.1.A1_at, Bt.4054.1.S1_at, Bt.1973.1.S1_at, Bt.6805.1.A1_at, Bt.5754.3.S1_at, Bt.23170.1.S1_at, Bt.23098.2.S1_at, Bt.23827.1.A1_at, Bt.5360.1.S1_a_at, Bt.11606.2.S1_at, Bt.4949.1.S1_at, Bt.9750.1.S1_a_at, Bt.5332.1.S1_at, Bt.27417.2.S1_at, Bt.5458.1.S1_at, Bt.2507.1.S1_at, Bt.5085.1.S1_at, Bt.20128.1.A1_at, Bt.19676.2.S1_a_at,	1	0.809704	77.4285
Functional Group 23	Median: 0.03660993932277565	Geo: 0.031848464372163474	Bt.5154.1.S1_at, Bt.5154.1.S1_s_at, Bt.222.1.S1_at, Bt.504.1.S1_at, Bt.12309.1.S1_at, Bt.5154.1.S1_at, Bt.5154.1.S1_s_at, Bt.23179.1.S1_at, Bt.23179.1.S2_at, Bt.14103.1.A1_at, Bt.23387.1.A1_at, Bt.4273.1.S1_at, Bt.29939.1.S1_at, Bt.29939.2.S1_at, Bt.83.2.A1_at, Bt.24270.1.S1_at, Bt.15789.1.S1_at, Bt.20176.1.S1_at, Bt.3080.1.S1_a_at, Bt.12365.1.S1_at, Bt.5024.1.S1_at, Bt.28288.1.S1_at, Bt.4680.1.S…
Category	Term	Count	%	PValue	Genes	Bonferroni	Benjamini	FDR
SP_PIR_KEYWORDS	molecular chaperone	5	0.0057	0.00361735	Bt.5154.1.S1_at, Bt.5154.1.S1_s_at, Bt.222.1.S1_at, Bt.504.1.S1_at, Bt.12309.1.S1_at, Bt.5154.1.S1_at, Bt.5154.1.S1_s_at,	0.930301	0.215056	5.3522
GOTERM_BP_ALL	GO:0006986~response to unfolded protein	7	0.008	0.00874465	Bt.23179.1.S1_at, Bt.23179.1.S2_at, Bt.5154.1.S1_at, Bt.5154.1.S1_s_at, Bt.14103.1.A1_at, Bt.23387.1.A1_at, Bt.4273.1.S1_at, Bt.29939.1.S1_at, Bt.29939.2.S1_at, Bt.504.1.S1_at, Bt.12309.1.S1_at, Bt.5154.1.S1_at, Bt.5154.1.S1_s_at,	1	0.349565	14.785
GOTERM_BP_ALL	GO:0051789~response to protein stimulus	7	0.008	0.00874465	Bt.23179.1.S1_at, Bt.23179.1.S2_at, Bt.5154.1.S1_at, Bt.5154.1.S1_s_at, Bt.14103.1.A1_at, Bt.23387.1.A1_at, Bt.4273.1.S1_at, Bt.29939.1.S1_at, Bt.29939.2.S1_at, Bt.504.1.S1_at, Bt.12309.1.S1_at, Bt.5154.1.S1_at, Bt.5154.1.S1_s_at,	1	0.349565	14.785
SP_PIR_KEYWORDS	chaperone	12	0.0137	0.00981569	Bt.23179.1.S1_at, Bt.23179.1.S2_at, Bt.5154.1.S1_at, Bt.5154.1.S1_s_at, Bt.14103.1.A1_at, Bt.23387.1.A1_at, Bt.83.2.A1_at, Bt.24270.1.S1_at, Bt.15789.1.S1_at, Bt.20176.1.S1_at, Bt.3080.1.S1_a_at, Bt.504.1.S1_at, Bt.12309.1.S1_at, Bt.5154.1.S1_at, Bt.5154.1.S1_s_at, Bt.12365.1.S1_at,	0.99929	0.364368	13.9059
GOTERM_MF_ALL	GO:0051082~unfolded protein binding	10	0.0115	0.0171994	Bt.23179.1.S1_at, Bt.23179.1.S2_at, Bt.5024.1.S1_at, Bt.83.2.A1_at, Bt.24270.1.S1_at, Bt.15789.1.S1_at, Bt.20176.1.S1_at, Bt.28288.1.S1_at, Bt.4680.1.S1_at, Bt.504.1.S1_at, Bt.12365.1.S1_at,	1	0.589979	25.5892
GOTERM_BP_ALL	GO:0009607~response to biotic stimulus	14	0.016	0.0219164	Bt.23179.1.S1_at, Bt.23179.1.S2_at, Bt.5154.1.S1_at, Bt.5154.1.S1_s_at, Bt.571.1.S1_at, Bt.24256.1.S1_at, Bt.24181.1.S1_at, Bt.12309.1.S1_at, Bt.23608.1.S1_s_at, Bt.28009.1.A1_at, Bt.14103.1.A1_at, Bt.23387.1.A1_at, Bt.4273.1.S1_at, Bt.29939.1.S1_at, Bt.29939.2.S1_at, Bt.28699.1.S1_at, Bt.4802.1.S1_at, Bt.7780.1.S1_at, Bt.2763.1.S1_at, Bt.5154.1.S1_at, Bt.5154.1.S1_s_at, Bt.504.1.S1_at,	1	0.501506	33.2135
SP_PIR_KEYWORDS	stress response	6	0.0069	0.0297603	Bt.23179.1.S1_at, Bt.23179.1.S2_at, Bt.5154.1.S1_at, Bt.5154.1.S1_s_at, Bt.4273.1.S1_at, Bt.29939.1.S1_at, Bt.29939.2.S1_at, Bt.504.1.S1_at, Bt.12309.1.S1_at, Bt.5154.1.S1_at, Bt.5154.1.S1_s_at,	1	0.603567	36.7828
GOTERM_BP_ALL	GO:0006457~protein folding	16	0.0183	0.0434595	Bt.23179.1.S1_at, Bt.23179.1.S2_at, Bt.5024.1.S1_at, Bt.5154.1.S1_at, Bt.5154.1.S1_s_at, Bt.24270.1.S1_at, Bt.4680.1.S1_at, Bt.4797.1.S1_at, Bt.12309.1.S1_at, Bt.12365.1.S1_at, Bt.83.2.A1_at, Bt.15789.1.S1_at, Bt.4273.1.S1_at, Bt.29939.1.S1_at, Bt.29939.2.S1_at, Bt.20176.1.S1_at, Bt.3080.1.S1_a_at, Bt.28288.1.S1_at, Bt.5154.1.S1_at, Bt.5154.1.S1_s_at, Bt.504.1.S1_at,	1	0.676792	55.4864
INTERPRO	IPR001023:Heat shock protein Hsp70	4	0.0046	0.0482453	Bt.5154.1.S1_at, Bt.5154.1.S1_s_at, Bt.4273.1.S1_at, Bt.29939.1.S1_at, Bt.29939.2.S1_at, Bt.12309.1.S1_at, Bt.5154.1.S1_at, Bt.5154.1.S1_s_at,	1	1	59.4225
INTERPRO	IPR013126:Heat shock protein 70	4	0.0046	0.0482453	Bt.5154.1.S1_at, Bt.5154.1.S1_s_at, Bt.4273.1.S1_at, Bt.29939.1.S1_at, Bt.29939.2.S1_at, Bt.12309.1.S1_at, Bt.5154.1.S1_at, Bt.5154.1.S1_s_at,	1	1	59.4225
GOTERM_BP_ALL	GO:0042221~response to chemical stimulus	16	0.0183	0.0484384	Bt.4748.1.S1_at, Bt.23179.1.S1_at, Bt.23179.1.S2_at, Bt.5154.1.S1_at, Bt.5154.1.S1_s_at, Bt.571.1.S1_at, Bt.58.1.S1_at, Bt.23354.1.S1_at, Bt.16068.1.A1_at, Bt.12309.1.S1_at, Bt.21745.1.S1_at, Bt.14103.1.A1_at, Bt.23387.1.A1_at, Bt.13324.4.S1_at, Bt.13324.1.S1_a_at, Bt.4273.1.S1_at, Bt.29939.1.S1_at, Bt.29939.2.S1_at, Bt.63.1.S1_at, Bt.5154.1.S1_at, Bt.5154.1.S1_s_at, Bt.504.1.S1_at, Bt.983.1.S1_a…	1	0.703502	59.5231
SP_PIR_KEYWORDS	ATP	8	0.0092	0.0767752	Bt.946.1.S1_at, Bt.17036.1.A1_s_at, Bt.5154.1.S1_at, Bt.5154.1.S1_s_at, Bt.4773.3.A1_at, Bt.1.1.S1_at, Bt.4476.1.S1_at, Bt.12309.1.S1_at, Bt.5154.1.S1_at, Bt.5154.1.S1_s_at,	1	0.804253	70.256
PIR_SUPERFAMILY	PIRSF002581:chaperone HSP70	3	0.0034	0.136141	Bt.5154.1.S1_at, Bt.5154.1.S1_s_at, Bt.12309.1.S1_at, Bt.5154.1.S1_at, Bt.5154.1.S1_s_at,	1	1	91.084
KEGG_PATHWAY	bta04612:Antigen processing and presentation	5	0.0057	0.708156	Bt.5269.1.S1_at, Bt.5269.2.S1_at, Bt.5154.1.S1_at, Bt.5154.1.S1_s_at, Bt.12309.1.S1_at, Bt.5154.1.S1_at, Bt.5154.1.S1_s_at, Bt.28686.2.S1_at,	1	0.994361	100
Functional Group 24	Median: 0.08102111000306111	Geo: 0.032266983214927235	Bt.26712.1.S1_at, Bt.20383.1.S1_at, Bt.23354.1.S1_at, Bt.5134.1.S1_at, Bt.4434.1.A1_at, Bt.5397.1.S1_at, Bt.24660.1.S1_at, Bt.3080.1.S1_a_at, Bt.621.1.S1_at, Bt.5308.1.S1_at, Bt.13553.2.S1_a_at, Bt.13553.1.S1_at, Bt.23179.1.S1_at, Bt.23179.1.S2_at, Bt.5517.1.S2_at, Bt.20230.1.S1_at, Bt.222.1.S1_at,
Category	Term	Count	%	PValue	Genes	Bonferroni	Benjamini	FDR
GOTERM_CC_ALL	GO:0005792~microsome	9	0.0103	0.00572619	Bt.26712.1.S1_at, Bt.20383.1.S1_at, Bt.23354.1.S1_at, Bt.5134.1.S1_at, Bt.4434.1.A1_at, Bt.5397.1.S1_at, Bt.24660.1.S1_at, Bt.3080.1.S1_a_at, Bt.621.1.S1_at, Bt.5308.1.S1_at, Bt.13553.2.S1_a_at, Bt.13553.1.S1_at,	0.95988	0.0648025	8.05811
GOTERM_CC_ALL	GO:0042598~vesicular fraction	9	0.0103	0.00572619	Bt.26712.1.S1_at, Bt.20383.1.S1_at, Bt.23354.1.S1_at, Bt.5134.1.S1_at, Bt.4434.1.A1_at, Bt.5397.1.S1_at, Bt.24660.1.S1_at, Bt.3080.1.S1_a_at, Bt.621.1.S1_at, Bt.5308.1.S1_at, Bt.13553.2.S1_a_at, Bt.13553.1.S1_at,	0.95988	0.0648025	8.05811
SP_PIR_KEYWORDS	microsome	6	0.0069	0.0810211	Bt.26712.1.S1_at, Bt.20383.1.S1_at, Bt.5134.1.S1_at, Bt.4434.1.A1_at, Bt.5397.1.S1_at, Bt.24660.1.S1_at, Bt.621.1.S1_at, Bt.13553.2.S1_a_at, Bt.13553.1.S1_at,	1	0.796553	72.2661
GOTERM_CC_ALL	GO:0000267~cell fraction	13	0.0149	0.0961334	Bt.23179.1.S1_at, Bt.23179.1.S2_at, Bt.23354.1.S1_at, Bt.5517.1.S2_at, Bt.621.1.S1_at, Bt.5308.1.S1_at, Bt.26712.1.S1_at, Bt.20383.1.S1_at, Bt.20230.1.S1_at, Bt.222.1.S1_at, Bt.5397.1.S1_at, Bt.5134.1.S1_at, Bt.4434.1.A1_at, Bt.24660.1.S1_at, Bt.3080.1.S1_a_at, Bt.13553.2.S1_a_at, Bt.13553.1.S1_at,	1	0.478261	77.2062
GOTERM_CC_ALL	GO:0005624~membrane fraction	11	0.0126	0.136958	Bt.26712.1.S1_at, Bt.20383.1.S1_at, Bt.20230.1.S1_at, Bt.23354.1.S1_at, Bt.5134.1.S1_at, Bt.4434.1.A1_at, Bt.5397.1.S1_at, Bt.24660.1.S1_at, Bt.5517.1.S2_at, Bt.3080.1.S1_a_at, Bt.621.1.S1_at, Bt.5308.1.S1_at, Bt.13553.2.S1_a_at, Bt.13553.1.S1_at,	1	0.580314	88.4079
Functional Group 25	Median: 0.028386987573761967	Geo: 0.03330090650886439	Bt.651.1.S1_at, Bt.5197.2.S1_at, Bt.4054.1.S1_at, Bt.5458.1.S1_at, Bt.23273.1.S1_at, Bt.20578.1.S1_s_at, Bt.2926.1.S1_at, Bt.12198.1.S1_at, Bt.23170.1.S1_at, Bt.5085.1.S1_at, Bt.8015.1.S1_a_at, Bt.7887.1.S1_at, Bt.4682.1.S1_at, Bt.6380.1.S1_at, Bt.2507.1.S1_at,
Category	Term	Count	%	PValue	Genes	Bonferroni	Benjamini	FDR
INTERPRO	IPR012677:Nucleotide-binding, alpha-beta plait	12	0.0137	0.00926851	Bt.651.1.S1_at, Bt.5197.2.S1_at, Bt.4054.1.S1_at, Bt.5458.1.S1_at, Bt.23273.1.S1_at, Bt.20578.1.S1_s_at, Bt.2926.1.S1_at, Bt.12198.1.S1_at, Bt.23170.1.S1_at, Bt.5085.1.S1_at, Bt.8015.1.S1_a_at, Bt.7887.1.S1_at, Bt.4682.1.S1_at,	1	1	15.6209
INTERPRO	IPR000504:RNA recognition motif, RNP-1	11	0.0126	0.028387	Bt.651.1.S1_at, Bt.5197.2.S1_at, Bt.4054.1.S1_at, Bt.5458.1.S1_at, Bt.23273.1.S1_at, Bt.20578.1.S1_s_at, Bt.2926.1.S1_at, Bt.12198.1.S1_at, Bt.23170.1.S1_at, Bt.5085.1.S1_at, Bt.7887.1.S1_at, Bt.4682.1.S1_at,	1	1	40.8613
SMART	SM00360:RRM	13	0.0149	0.140359	Bt.651.1.S1_at, Bt.5197.2.S1_at, Bt.4054.1.S1_at, Bt.12198.1.S1_at, Bt.2926.1.S1_at, Bt.23170.1.S1_at, Bt.6380.1.S1_at, Bt.7887.1.S1_at, Bt.4682.1.S1_at, Bt.23273.1.S1_at, Bt.5458.1.S1_at, Bt.20578.1.S1_s_at, Bt.2507.1.S1_at, Bt.5085.1.S1_at,	1	0.999996	88.6444
Functional Group 26	Median: 0.04655265782932649	Geo: 0.0447983165304076	Bt.5449.1.S1_at, Bt.26712.1.S1_at, Bt.20383.1.S1_at, Bt.714.1.S1_at, Bt.3960.2.S1_at, Bt.3960.1.S1_a_at, Bt.10146.1.S1_at, Bt.10146.2.S1_at, Bt.29570.1.S1_at, Bt.4099.1.S1_at,
Category	Term	Count	%	PValue	Genes	Bonferroni	Benjamini	FDR
GOTERM_CC_ALL	GO:0031968~organelle outer membrane	7	0.008	0.0154229	Bt.5449.1.S1_at, Bt.26712.1.S1_at, Bt.20383.1.S1_at, Bt.714.1.S1_at, Bt.3960.2.S1_at, Bt.3960.1.S1_a_at, Bt.10146.1.S1_at, Bt.10146.2.S1_at, Bt.29570.1.S1_at, Bt.4099.1.S1_at,	0.999834	0.132977	20.3391
GOTERM_CC_ALL	GO:0019867~outer membrane	7	0.008	0.0465527	Bt.5449.1.S1_at, Bt.26712.1.S1_at, Bt.20383.1.S1_at, Bt.714.1.S1_at, Bt.3960.2.S1_at, Bt.3960.1.S1_a_at, Bt.10146.1.S1_at, Bt.10146.2.S1_at, Bt.29570.1.S1_at, Bt.4099.1.S1_at,	1	0.306286	50.213
GOTERM_CC_ALL	GO:0005741~mitochondrial outer membrane	5	0.0057	0.12522	Bt.26712.1.S1_at, Bt.20383.1.S1_at, Bt.3960.2.S1_at, Bt.3960.1.S1_a_at, Bt.10146.1.S1_at, Bt.10146.2.S1_at, Bt.29570.1.S1_at, Bt.4099.1.S1_at,	1	0.55317	85.8749
Functional Group 27	Median: 0.04931624772995663	Geo: 0.053229130457695686	Bt.5449.1.S1_at, Bt.4834.1.S1_at, Bt.18808.1.S1_at, Bt.4138.1.S1_a_at, Bt.5141.1.S1_at, Bt.5141.1.S2_at, Bt.13220.1.S1_at, Bt.16068.1.A1_at, Bt.6438.1.A1_at,
Category	Term	Count	%	PValue	Genes	Bonferroni	Benjamini	FDR
GOTERM_BP_ALL	GO:0030323~respiratory tube development	4	0.0046	0.0269083	Bt.5449.1.S1_at, Bt.4834.1.S1_at, Bt.18808.1.S1_at, Bt.4138.1.S1_a_at,	1	0.542984	39.1572
GOTERM_BP_ALL	GO:0030324~lung development	4	0.0046	0.0269083	Bt.5449.1.S1_at, Bt.4834.1.S1_at, Bt.18808.1.S1_at, Bt.4138.1.S1_a_at,	1	0.542984	39.1572
GOTERM_BP_ALL	GO:0035295~tube development	7	0.008	0.0717242	Bt.5141.1.S1_at, Bt.5141.1.S2_at, Bt.5449.1.S1_at, Bt.4834.1.S1_at, Bt.13220.1.S1_at, Bt.18808.1.S1_at, Bt.4138.1.S1_a_at, Bt.16068.1.A1_at,	1	0.791665	74.2246
GOTERM_BP_ALL	GO:0007423~sensory organ development	4	0.0046	0.154582	Bt.6438.1.A1_at, Bt.4834.1.S1_at, Bt.18808.1.S1_at, Bt.4138.1.S1_a_at,	1	0.934634	95.3061
Functional Group 28	Median: 0.04467975280696074	Geo: 0.05605268171237521	Bt.59.1.S1_at, Bt.13324.4.S1_at, Bt.13324.1.S1_a_at, Bt.58.1.S1_at, Bt.67.1.S1_at, Bt.63.1.S1_at, Bt.4704.1.S1_at, Bt.6483.1.A1_at, Bt.24376.1.S1_at, Bt.61.1.S1_at, Bt.23357.1.S1_at, Bt.4262.1.S1_a_at, Bt.5534.1.S1_at, Bt.9731.1.S1_at, Bt.6465.1.S1_at, Bt.4970.1.S1_at, Bt.8479.1.A1_at, Bt.3080.1.S1_a_at, Bt.436.1.S1_at, Bt.8421.1.A1_at, Bt.3005.1.S1_at, Bt.27130.1.S1_at, Bt.22854.2.S1_at, Bt.5231…
Category	Term	Count	%	PValue	Genes	Bonferroni	Benjamini	FDR
GOTERM_MF_ALL	GO:0016651~oxidoreductase activity, acting on NADH or NADPH	11	0.0126	0.0112152	Bt.59.1.S1_at, Bt.13324.4.S1_at, Bt.13324.1.S1_a_at, Bt.58.1.S1_at, Bt.67.1.S1_at, Bt.63.1.S1_at, Bt.4704.1.S1_at, Bt.6483.1.A1_at, Bt.24376.1.S1_at, Bt.61.1.S1_at, Bt.23357.1.S1_at, Bt.4262.1.S1_a_at, Bt.5534.1.S1_at,	1	0.489862	17.4816
GOTERM_MF_ALL	GO:0009055~electron carrier activity	14	0.016	0.0404422	Bt.9731.1.S1_at, Bt.67.1.S1_at, Bt.6465.1.S1_at, Bt.58.1.S1_at, Bt.6483.1.A1_at, Bt.24376.1.S1_at, Bt.4970.1.S1_at, Bt.5534.1.S1_at, Bt.59.1.S1_at, Bt.8479.1.A1_at, Bt.63.1.S1_at, Bt.3080.1.S1_a_at, Bt.4704.1.S1_at, Bt.61.1.S1_at, Bt.4262.1.S1_a_at,	1	0.809915	50.5061
GOTERM_MF_ALL	GO:0050136~NADH dehydrogenase (quinone) activity	8	0.0092	0.0446798	Bt.59.1.S1_at, Bt.58.1.S1_at, Bt.67.1.S1_at, Bt.63.1.S1_at, Bt.4704.1.S1_at, Bt.6483.1.A1_at, Bt.24376.1.S1_at, Bt.61.1.S1_at, Bt.4262.1.S1_a_at,	1	0.797191	54.1008
GOTERM_MF_ALL	GO:0008137~NADH dehydrogenase (ubiquinone) activity	8	0.0092	0.0446798	Bt.59.1.S1_at, Bt.58.1.S1_at, Bt.67.1.S1_at, Bt.63.1.S1_at, Bt.4704.1.S1_at, Bt.6483.1.A1_at, Bt.24376.1.S1_at, Bt.61.1.S1_at, Bt.4262.1.S1_a_at,	1	0.797191	54.1008
GOTERM_MF_ALL	GO:0003954~NADH dehydrogenase activity	8	0.0092	0.0446798	Bt.59.1.S1_at, Bt.58.1.S1_at, Bt.67.1.S1_at, Bt.63.1.S1_at, Bt.4704.1.S1_at, Bt.6483.1.A1_at, Bt.24376.1.S1_at, Bt.61.1.S1_at, Bt.4262.1.S1_a_at,	1	0.797191	54.1008
GOTERM_MF_ALL	GO:0016655~oxidoreductase activity, acting on NADH or NADPH, quinone or similar compound as acceptor	8	0.0092	0.0487889	Bt.59.1.S1_at, Bt.58.1.S1_at, Bt.67.1.S1_at, Bt.63.1.S1_at, Bt.4704.1.S1_at, Bt.6483.1.A1_at, Bt.24376.1.S1_at, Bt.61.1.S1_at, Bt.4262.1.S1_a_at,	1	0.808415	57.3508
SP_PIR_KEYWORDS	NAD	15	0.0172	0.149916	Bt.436.1.S1_at, Bt.8421.1.A1_at, Bt.3005.1.S1_at, Bt.27130.1.S1_at, Bt.67.1.S1_at, Bt.58.1.S1_at, Bt.6483.1.A1_at, Bt.24376.1.S1_at, Bt.22854.2.S1_at, Bt.23357.1.S1_at, Bt.59.1.S1_at, Bt.5231.1.S1_at, Bt.13324.4.S1_at, Bt.13324.1.S1_a_at, Bt.63.1.S1_at, Bt.4704.1.S1_at, Bt.61.1.S1_at, Bt.4262.1.S1_a_at,	1	0.881373	91.5025
SP_PIR_KEYWORDS	ubiquinone	8	0.0092	0.329327	Bt.59.1.S1_at, Bt.58.1.S1_at, Bt.67.1.S1_at, Bt.63.1.S1_at, Bt.4704.1.S1_at, Bt.6483.1.A1_at, Bt.24376.1.S1_at, Bt.61.1.S1_at, Bt.4262.1.S1_a_at,	1	0.977922	99.7674
Functional Group 29	Median: 0.057228490951171065	Geo: 0.06983091431474917	Bt.4689.1.S2_at, Bt.6473.1.S1_at, Bt.641.1.S1_at, Bt.13886.2.S1_at, Bt.21721.1.A1_at, Bt.29830.1.A1_at, Bt.4966.1.S1_at, Bt.16132.2.S1_a_at, Bt.886.1.S1_at, Bt.21986.1.A1_at, Bt.7644.1.S1_at, Bt.24017.1.A1_s_at, Bt.4756.1.S1_at, Bt.5079.1.S1_at, Bt.5131.1.S1_at, Bt.24459.2.S1_at, Bt.3005.1.S1_at, Bt.7283.1.S1_at, Bt.5033.1.S1_at, Bt.20141.1.S1_at, Bt.5517.1.S2_at, Bt.23357.1.S1_at, Bt.13170.1.S1_…
Category	Term	Count	%	PValue	Genes	Bonferroni	Benjamini	FDR
GOTERM_BP_ALL	GO:0006511~ubiquitin-dependent protein catabolic process	11	0.0126	0.0101235	Bt.4689.1.S2_at, Bt.6473.1.S1_at, Bt.641.1.S1_at, Bt.13886.2.S1_at, Bt.21721.1.A1_at, Bt.29830.1.A1_at, Bt.4966.1.S1_at, Bt.16132.2.S1_a_at, Bt.886.1.S1_at, Bt.21986.1.A1_at, Bt.7644.1.S1_at,	1	0.363502	16.9186
GOTERM_BP_ALL	GO:0019941~modification-dependent protein catabolic process	11	0.0126	0.0112852	Bt.4689.1.S2_at, Bt.6473.1.S1_at, Bt.641.1.S1_at, Bt.13886.2.S1_at, Bt.21721.1.A1_at, Bt.29830.1.A1_at, Bt.4966.1.S1_at, Bt.16132.2.S1_a_at, Bt.886.1.S1_at, Bt.21986.1.A1_at, Bt.7644.1.S1_at,	1	0.387877	18.6769
GOTERM_BP_ALL	GO:0043632~modification-dependent macromolecule catabolic process	11	0.0126	0.0112852	Bt.4689.1.S2_at, Bt.6473.1.S1_at, Bt.641.1.S1_at, Bt.13886.2.S1_at, Bt.21721.1.A1_at, Bt.29830.1.A1_at, Bt.4966.1.S1_at, Bt.16132.2.S1_a_at, Bt.886.1.S1_at, Bt.21986.1.A1_at, Bt.7644.1.S1_at,	1	0.387877	18.6769
GOTERM_BP_ALL	GO:0051603~proteolysis involved in cellular protein catabolic process	11	0.0126	0.0112852	Bt.4689.1.S2_at, Bt.6473.1.S1_at, Bt.641.1.S1_at, Bt.13886.2.S1_at, Bt.21721.1.A1_at, Bt.29830.1.A1_at, Bt.4966.1.S1_at, Bt.16132.2.S1_a_at, Bt.886.1.S1_at, Bt.21986.1.A1_at, Bt.7644.1.S1_at,	1	0.387877	18.6769
GOTERM_BP_ALL	GO:0044257~cellular protein catabolic process	11	0.0126	0.0125451	Bt.4689.1.S2_at, Bt.6473.1.S1_at, Bt.641.1.S1_at, Bt.13886.2.S1_at, Bt.21721.1.A1_at, Bt.29830.1.A1_at, Bt.4966.1.S1_at, Bt.16132.2.S1_a_at, Bt.886.1.S1_at, Bt.21986.1.A1_at, Bt.7644.1.S1_at,	1	0.393754	20.544
GOTERM_BP_ALL	GO:0030163~protein catabolic process	13	0.0149	0.0180907	Bt.24017.1.A1_s_at, Bt.4756.1.S1_at, Bt.641.1.S1_at, Bt.13886.2.S1_at, Bt.4966.1.S1_at, Bt.16132.2.S1_a_at, Bt.21986.1.A1_at, Bt.886.1.S1_at, Bt.4689.1.S2_at, Bt.6473.1.S1_at, Bt.21721.1.A1_at, Bt.29830.1.A1_at, Bt.5079.1.S1_at, Bt.7644.1.S1_at,	1	0.472671	28.2912
GOTERM_BP_ALL	GO:0043285~biopolymer catabolic process	15	0.0172	0.0193478	Bt.24017.1.A1_s_at, Bt.4756.1.S1_at, Bt.641.1.S1_at, Bt.5131.1.S1_at, Bt.13886.2.S1_at, Bt.24459.2.S1_at, Bt.4966.1.S1_at, Bt.16132.2.S1_a_at, Bt.886.1.S1_at, Bt.21986.1.A1_at, Bt.4689.1.S2_at, Bt.6473.1.S1_at, Bt.21721.1.A1_at, Bt.29830.1.A1_at, Bt.5079.1.S1_at, Bt.7644.1.S1_at,	1	0.492219	29.9453
GOTERM_BP_ALL	GO:0044265~cellular macromolecule catabolic process	15	0.0172	0.0238618	Bt.641.1.S1_at, Bt.5131.1.S1_at, Bt.13886.2.S1_at, Bt.24459.2.S1_at, Bt.3005.1.S1_at, Bt.4966.1.S1_at, Bt.16132.2.S1_a_at, Bt.886.1.S1_at, Bt.21986.1.A1_at, Bt.7283.1.S1_at, Bt.4689.1.S2_at, Bt.6473.1.S1_at, Bt.21721.1.A1_at, Bt.29830.1.A1_at, Bt.7644.1.S1_at,	1	0.528397	35.5922
GOTERM_MF_ALL	GO:0004298~threonine endopeptidase activity	5	0.0057	0.034492	Bt.6473.1.S1_at, Bt.641.1.S1_at, Bt.4966.1.S1_at, Bt.886.1.S1_at, Bt.7644.1.S1_at,	1	0.786925	45.0091
GOTERM_CC_ALL	GO:0005839~proteasome core complex (sensu Eukaryota)	5	0.0057	0.0510559	Bt.6473.1.S1_at, Bt.641.1.S1_at, Bt.4966.1.S1_at, Bt.886.1.S1_at, Bt.7644.1.S1_at,	1	0.327384	53.5446
GOTERM_BP_ALL	GO:0044248~cellular catabolic process	23	0.0263	0.0561704	Bt.641.1.S1_at, Bt.5131.1.S1_at, Bt.13886.2.S1_at, Bt.24459.2.S1_at, Bt.3005.1.S1_at, Bt.5033.1.S1_at, Bt.20141.1.S1_at, Bt.5517.1.S2_at, Bt.4966.1.S1_at, Bt.16132.2.S1_a_at, Bt.23357.1.S1_at, Bt.886.1.S1_at, Bt.21986.1.A1_at, Bt.7283.1.S1_at, Bt.4689.1.S2_at, Bt.6473.1.S1_at, Bt.13170.1.S1_at, Bt.13324.4.S1_at, Bt.13324.1.S1_a_at, Bt.21721.1.A1_at, Bt.29830.1.A1_at, Bt.8624.1.S1_at, Bt.2711.1.S1…	1	0.734895	65.1131
GOTERM_BP_ALL	GO:0009057~macromolecule catabolic process	17	0.0195	0.0572285	Bt.24017.1.A1_s_at, Bt.4756.1.S1_at, Bt.641.1.S1_at, Bt.5131.1.S1_at, Bt.13886.2.S1_at, Bt.24459.2.S1_at, Bt.3005.1.S1_at, Bt.4966.1.S1_at, Bt.16132.2.S1_a_at, Bt.886.1.S1_at, Bt.21986.1.A1_at, Bt.7283.1.S1_at, Bt.4689.1.S2_at, Bt.6473.1.S1_at, Bt.21721.1.A1_at, Bt.29830.1.A1_at, Bt.5079.1.S1_at, Bt.7644.1.S1_at,	1	0.739231	65.8187
GOTERM_CC_ALL	GO:0000502~proteasome complex (sensu Eukaryota)	5	0.0057	0.0895087	Bt.6473.1.S1_at, Bt.641.1.S1_at, Bt.4966.1.S1_at, Bt.886.1.S1_at, Bt.7644.1.S1_at,	1	0.464813	74.6361
KEGG_PATHWAY	bta03050:Proteasome	5	0.0057	0.125321	Bt.24017.1.A1_s_at, Bt.4756.1.S1_at, Bt.6473.1.S1_at, Bt.4966.1.S1_at, Bt.886.1.S1_at, Bt.7644.1.S1_at,	1	0.992946	80.9257
GOTERM_BP_ALL	GO:0009056~catabolic process	26	0.0298	0.142852	Bt.24459.2.S1_at, Bt.13886.2.S1_at, Bt.3005.1.S1_at, Bt.16132.2.S1_a_at, Bt.21875.1.S1_at, Bt.7283.1.S1_at, Bt.8624.1.S1_at, Bt.7644.1.S1_at, Bt.24017.1.A1_s_at, Bt.4756.1.S1_at, Bt.641.1.S1_at, Bt.5131.1.S1_at, Bt.5033.1.S1_at, Bt.20141.1.S1_at, Bt.4966.1.S1_at, Bt.5517.1.S2_at, Bt.23357.1.S1_at, Bt.21986.1.A1_at, Bt.886.1.S1_at, Bt.4689.1.S2_at, Bt.13170.1.S1_at, Bt.6473.1.S1_at, Bt.13324.4.S1_…	1	0.923196	93.9668
GOTERM_MF_ALL	GO:0016790~thiolester hydrolase activity	6	0.0069	0.144379	Bt.4689.1.S2_at, Bt.13886.2.S1_at, Bt.21721.1.A1_at, Bt.29830.1.A1_at, Bt.22854.2.S1_at, Bt.21986.1.A1_at,	1	0.965065	92.9806
GOTERM_MF_ALL	GO:0004221~ubiquitin thiolesterase activity	5	0.0057	0.154188	Bt.4689.1.S2_at, Bt.13886.2.S1_at, Bt.21721.1.A1_at, Bt.29830.1.A1_at, Bt.21986.1.A1_at,	1	0.970413	94.2324
GOTERM_MF_ALL	GO:0004843~ubiquitin-specific protease activity	5	0.0057	0.154188	Bt.4689.1.S2_at, Bt.13886.2.S1_at, Bt.21721.1.A1_at, Bt.29830.1.A1_at, Bt.21986.1.A1_at,	1	0.970413	94.2324
GOTERM_MF_ALL	GO:0019783~small conjugating protein-specific protease activity	5	0.0057	0.154188	Bt.4689.1.S2_at, Bt.13886.2.S1_at, Bt.21721.1.A1_at, Bt.29830.1.A1_at, Bt.21986.1.A1_at,	1	0.970413	94.2324
GOTERM_MF_ALL	GO:0008234~cysteine-type peptidase activity	7	0.008	0.455424	Bt.4689.1.S2_at, Bt.13886.2.S1_at, Bt.21721.1.A1_at, Bt.29830.1.A1_at, Bt.1404.2.S1_at, Bt.1404.1.S1_at, Bt.1404.3.A1_at, Bt.28686.2.S1_at, Bt.21986.1.A1_at,	1	0.999915	99.9968
GOTERM_MF_ALL	GO:0008233~peptidase activity	26	0.0298	0.866546	Bt.4896.2.S1_at, Bt.2110.1.S1_at, Bt.13886.2.S1_at, Bt.9797.1.S1_at, Bt.3852.1.S1_at, Bt.28686.2.S1_at, Bt.5397.1.S1_at, Bt.21675.1.S1_at, Bt.2898.3.S1_at, Bt.7644.1.S1_at, Bt.641.1.S1_at, Bt.4966.1.S1_at, Bt.621.1.S1_at, Bt.21986.1.A1_at, Bt.886.1.S1_at, Bt.4689.1.S2_at, Bt.6473.1.S1_at, Bt.26992.1.A1_at, Bt.21721.1.A1_at, Bt.6143.1.S1_at, Bt.29830.1.A1_at, Bt.13387.1.S1_at, Bt.4802.1.S1_at, Bt.…	1	1	100
GOTERM_BP_ALL	GO:0006508~proteolysis	27	0.0309	0.902918	Bt.4896.2.S1_at, Bt.2110.1.S1_at, Bt.13886.2.S1_at, Bt.9797.1.S1_at, Bt.3852.1.S1_at, Bt.16132.2.S1_a_at, Bt.28686.2.S1_at, Bt.5397.1.S1_at, Bt.21675.1.S1_at, Bt.2898.3.S1_at, Bt.7644.1.S1_at, Bt.641.1.S1_at, Bt.4775.1.S1_at, Bt.4966.1.S1_at, Bt.621.1.S1_at, Bt.21986.1.A1_at, Bt.886.1.S1_at, Bt.4689.1.S2_at, Bt.6473.1.S1_at, Bt.26992.1.A1_at, Bt.22840.1.S1_a_at, Bt.21721.1.A1_at, Bt.6143.1.S1_at,…	1	1	100
GOTERM_MF_ALL	GO:0004175~endopeptidase activity	13	0.0149	0.992683	Bt.641.1.S1_at, Bt.9797.1.S1_at, Bt.4966.1.S1_at, Bt.3852.1.S1_at, Bt.621.1.S1_at, Bt.886.1.S1_at, Bt.28686.2.S1_at, Bt.6473.1.S1_at, Bt.26992.1.A1_at, Bt.4802.1.S1_at, Bt.7780.1.S1_at, Bt.13387.1.S1_at, Bt.1404.2.S1_at, Bt.1404.1.S1_at, Bt.1404.3.A1_at, Bt.7644.1.S1_at,	1	1	100
Functional Group 30	Median: 0.0744748777289585	Geo: 0.07081289084928367	Bt.5609.3.A1_a_at, Bt.5609.1.A1_a_at, Bt.4116.1.S1_at, Bt.5037.1.S2_at, Bt.21537.1.A1_at, Bt.5150.1.S1_at, Bt.4314.1.S1_at, Bt.5970.1.S1_a_at, Bt.18325.1.A1_at, Bt.18325.2.A1_a_at, Bt.4775.1.S1_at, Bt.12896.1.S1_at, Bt.212.1.S1_at, Bt.247.1.S1_at, Bt.247.1.S2_at, Bt.4107.1.S1_at, Bt.9637.1.S1_at, Bt.3215.1.S1_at,
Category	Term	Count	%	PValue	Genes	Bonferroni	Benjamini	FDR
SP_PIR_KEYWORDS	calcium binding	12	0.0137	0.00482091	Bt.5609.3.A1_a_at, Bt.5609.1.A1_a_at, Bt.4116.1.S1_at, Bt.5037.1.S2_at, Bt.21537.1.A1_at, Bt.5150.1.S1_at, Bt.4314.1.S1_at, Bt.5970.1.S1_a_at, Bt.18325.1.A1_at, Bt.18325.2.A1_a_at, Bt.4775.1.S1_at, Bt.12896.1.S1_at, Bt.212.1.S1_at, Bt.247.1.S1_at, Bt.247.1.S2_at, Bt.4107.1.S1_at,	0.971331	0.239079	7.07281
SP_PIR_KEYWORDS	endonexin fold	4	0.0046	0.0106326	Bt.4116.1.S1_at, Bt.5150.1.S1_at, Bt.4314.1.S1_at, Bt.247.1.S1_at, Bt.247.1.S2_at,	0.999613	0.370083	14.9778
UP_SEQ_FEATURE	repeat:Annexin 1	4	0.0046	0.0394402	Bt.4116.1.S1_at, Bt.5150.1.S1_at, Bt.4314.1.S1_at, Bt.247.1.S1_at, Bt.247.1.S2_at,	1	1	52.1358
UP_SEQ_FEATURE	repeat:Annexin 4	4	0.0046	0.0394402	Bt.4116.1.S1_at, Bt.5150.1.S1_at, Bt.4314.1.S1_at, Bt.247.1.S1_at, Bt.247.1.S2_at,	1	1	52.1358
UP_SEQ_FEATURE	repeat:Annexin 2	4	0.0046	0.0394402	Bt.4116.1.S1_at, Bt.5150.1.S1_at, Bt.4314.1.S1_at, Bt.247.1.S1_at, Bt.247.1.S2_at,	1	1	52.1358
UP_SEQ_FEATURE	repeat:Annexin 3	4	0.0046	0.0394402	Bt.4116.1.S1_at, Bt.5150.1.S1_at, Bt.4314.1.S1_at, Bt.247.1.S1_at, Bt.247.1.S2_at,	1	1	52.1358
SP_PIR_KEYWORDS	calcium/phospholipid-binding	4	0.0046	0.0642713	Bt.4116.1.S1_at, Bt.5150.1.S1_at, Bt.4314.1.S1_at, Bt.247.1.S1_at, Bt.247.1.S2_at,	1	0.762135	63.5177
SP_PIR_KEYWORDS	phospholipid binding	4	0.0046	0.0846784	Bt.4116.1.S1_at, Bt.5150.1.S1_at, Bt.4314.1.S1_at, Bt.247.1.S1_at, Bt.247.1.S2_at,	1	0.79529	73.895
SP_PIR_KEYWORDS	annexin	4	0.0046	0.0846784	Bt.4116.1.S1_at, Bt.5150.1.S1_at, Bt.4314.1.S1_at, Bt.247.1.S1_at, Bt.247.1.S2_at,	1	0.79529	73.895
GOTERM_MF_ALL	GO:0005544~calcium-dependent phospholipid binding	4	0.0046	0.115722	Bt.4116.1.S1_at, Bt.5150.1.S1_at, Bt.4314.1.S1_at, Bt.247.1.S1_at, Bt.247.1.S2_at,	1	0.949898	87.6959
SMART	SM00335:ANX	4	0.0046	0.161727	Bt.4116.1.S1_at, Bt.5150.1.S1_at, Bt.4314.1.S1_at, Bt.247.1.S1_at, Bt.247.1.S2_at,	1	0.99994	92.0938
INTERPRO	IPR001464:Annexin	4	0.0046	0.315713	Bt.4116.1.S1_at, Bt.5150.1.S1_at, Bt.4314.1.S1_at, Bt.247.1.S1_at, Bt.247.1.S2_at,	1	1	99.9012
PIR_SUPERFAMILY	PIRSF002359:annexin I	3	0.0034	0.345076	Bt.4116.1.S1_at, Bt.4314.1.S1_at, Bt.247.1.S1_at, Bt.247.1.S2_at,	1	1	99.908
GOTERM_MF_ALL	GO:0005543~phospholipid binding	6	0.0069	0.684032	Bt.4116.1.S1_at, Bt.5150.1.S1_at, Bt.4314.1.S1_at, Bt.9637.1.S1_at, Bt.3215.1.S1_at, Bt.247.1.S1_at, Bt.247.1.S2_at,	1	1	100
Functional Group 31	Median: 0.04428779690087341	Geo: 0.07306059806492561	Bt.13170.1.S1_at, Bt.13324.4.S1_at, Bt.13324.1.S1_a_at, Bt.5033.1.S1_at, Bt.22763.2.S1_a_at, Bt.22763.1.S1_at, Bt.23357.1.S1_at, Bt.2711.1.S1_at, Bt.58.1.S1_at, Bt.7283.1.S1_at, Bt.21503.1.S1_at, Bt.5141.1.S1_at, Bt.5141.1.S2_at, Bt.5131.1.S1_at, Bt.20931.1.S1_at, Bt.3005.1.S1_at, Bt.12126.1.S1_at, Bt.13053.1.A1_at,
Category	Term	Count	%	PValue	Genes	Bonferroni	Benjamini	FDR
GOTERM_BP_ALL	GO:0006084~acetyl-CoA metabolic process	6	0.0069	0.00981977	Bt.13170.1.S1_at, Bt.13324.4.S1_at, Bt.13324.1.S1_a_at, Bt.5033.1.S1_at, Bt.22763.2.S1_a_at, Bt.22763.1.S1_at, Bt.23357.1.S1_at, Bt.2711.1.S1_at,	1	0.366445	16.453
GOTERM_BP_ALL	GO:0045333~cellular respiration	6	0.0069	0.0121764	Bt.13170.1.S1_at, Bt.13324.4.S1_at, Bt.13324.1.S1_a_at, Bt.5033.1.S1_at, Bt.58.1.S1_at, Bt.23357.1.S1_at, Bt.2711.1.S1_at,	1	0.388304	20.0018
GOTERM_BP_ALL	GO:0006099~tricarboxylic acid cycle	5	0.0057	0.0373942	Bt.13170.1.S1_at, Bt.13324.4.S1_at, Bt.13324.1.S1_a_at, Bt.5033.1.S1_at, Bt.23357.1.S1_at, Bt.2711.1.S1_at,	1	0.643633	50.0543
GOTERM_BP_ALL	GO:0046356~acetyl-CoA catabolic process	5	0.0057	0.0373942	Bt.13170.1.S1_at, Bt.13324.4.S1_at, Bt.13324.1.S1_a_at, Bt.5033.1.S1_at, Bt.23357.1.S1_at, Bt.2711.1.S1_at,	1	0.643633	50.0543
GOTERM_BP_ALL	GO:0009060~aerobic respiration	5	0.0057	0.0373942	Bt.13170.1.S1_at, Bt.13324.4.S1_at, Bt.13324.1.S1_a_at, Bt.5033.1.S1_at, Bt.23357.1.S1_at, Bt.2711.1.S1_at,	1	0.643633	50.0543
GOTERM_BP_ALL	GO:0009109~coenzyme catabolic process	5	0.0057	0.0442878	Bt.13170.1.S1_at, Bt.13324.4.S1_at, Bt.13324.1.S1_a_at, Bt.5033.1.S1_at, Bt.23357.1.S1_at, Bt.2711.1.S1_at,	1	0.681061	56.1833
GOTERM_BP_ALL	GO:0051187~cofactor catabolic process	5	0.0057	0.0784046	Bt.13170.1.S1_at, Bt.13324.4.S1_at, Bt.13324.1.S1_a_at, Bt.5033.1.S1_at, Bt.23357.1.S1_at, Bt.2711.1.S1_at,	1	0.811384	77.4022
SP_PIR_KEYWORDS	Tricarboxylic acid cycle	4	0.0046	0.132265	Bt.13170.1.S1_at, Bt.13324.4.S1_at, Bt.13324.1.S1_a_at, Bt.5033.1.S1_at, Bt.23357.1.S1_at,	1	0.870566	88.3917
GOTERM_BP_ALL	GO:0044262~cellular carbohydrate metabolic process	12	0.0137	0.255576	Bt.7283.1.S1_at, Bt.21503.1.S1_at, Bt.13170.1.S1_at, Bt.5141.1.S1_at, Bt.5141.1.S2_at, Bt.5131.1.S1_at, Bt.13324.4.S1_at, Bt.13324.1.S1_a_at, Bt.20931.1.S1_at, Bt.5033.1.S1_at, Bt.3005.1.S1_at, Bt.12126.1.S1_at, Bt.23357.1.S1_at, Bt.2711.1.S1_at,	1	0.981597	99.5375
KEGG_PATHWAY	bta00020:Citrate cycle (TCA cycle)	3	0.0034	0.508134	Bt.13170.1.S1_at, Bt.13324.4.S1_at, Bt.13324.1.S1_a_at, Bt.5033.1.S1_at,	1	0.998071	99.9846
GOTERM_BP_ALL	GO:0005975~carbohydrate metabolic process	13	0.0149	0.849012	Bt.5141.1.S1_at, Bt.5141.1.S2_at, Bt.5131.1.S1_at, Bt.3005.1.S1_at, Bt.5033.1.S1_at, Bt.23357.1.S1_at, Bt.7283.1.S1_at, Bt.21503.1.S1_at, Bt.13170.1.S1_at, Bt.13324.4.S1_at, Bt.13324.1.S1_a_at, Bt.20931.1.S1_at, Bt.13053.1.A1_at, Bt.12126.1.S1_at, Bt.2711.1.S1_at,	1	1	100
Functional Group 32	Median: 0.1846385645887072	Geo: 0.07649444760977234	Bt.2573.1.S1_at, Bt.13163.1.A1_at, Bt.13163.1.S1_at, Bt.21493.1.S1_at, Bt.5049.1.S1_at, Bt.29281.1.S1_at, Bt.58.1.S1_at, Bt.499.1.S1_a_at, Bt.5000.1.S1_at, Bt.23637.1.S1_s_at, Bt.27280.1.A1_at, Bt.4797.1.S1_at, Bt.23103.1.S1_at, Bt.3079.1.S1_at, Bt.28699.1.S1_at, Bt.13483.1.A1_at, Bt.983.1.S1_at, Bt.853.1.S1_at, Bt.5308.1.S1_at, Bt.3562.1.S1_at, Bt.23205.1.S1_s_at,
Category	Term	Count	%	PValue	Genes	Bonferroni	Benjamini	FDR
GOTERM_BP_ALL	GO:0006461~protein complex assembly	15	0.0172	0.000276035	Bt.2573.1.S1_at, Bt.13163.1.A1_at, Bt.13163.1.S1_at, Bt.21493.1.S1_at, Bt.5049.1.S1_at, Bt.29281.1.S1_at, Bt.58.1.S1_at, Bt.499.1.S1_a_at, Bt.5000.1.S1_at, Bt.23637.1.S1_s_at, Bt.27280.1.A1_at, Bt.4797.1.S1_at, Bt.23103.1.S1_at, Bt.3079.1.S1_at, Bt.28699.1.S1_at, Bt.13483.1.A1_at, Bt.983.1.S1_at,	0.601211	0.0391822	0.501631
GOTERM_MF_ALL	GO:0008565~protein transporter activity	10	0.0115	0.00433228	Bt.21493.1.S1_at, Bt.13163.1.A1_at, Bt.13163.1.S1_at, Bt.5049.1.S1_at, Bt.29281.1.S1_at, Bt.23103.1.S1_at, Bt.3079.1.S1_at, Bt.853.1.S1_at, Bt.23637.1.S1_s_at, Bt.27280.1.A1_at, Bt.5000.1.S1_at, Bt.5308.1.S1_at,	0.999675	0.317834	7.12986
GOTERM_CC_ALL	GO:0005905~coated pit	5	0.0057	0.00823205	Bt.13163.1.A1_at, Bt.13163.1.S1_at, Bt.29281.1.S1_at, Bt.3079.1.S1_at, Bt.3562.1.S1_at, Bt.5000.1.S1_at,	0.990236	0.0867679	11.3905
GOTERM_CC_ALL	GO:0030131~clathrin adaptor complex	5	0.0057	0.0148376	Bt.13163.1.A1_at, Bt.13163.1.S1_at, Bt.29281.1.S1_at, Bt.23103.1.S1_at, Bt.3079.1.S1_at, Bt.23637.1.S1_s_at, Bt.27280.1.A1_at,	0.999769	0.130226	19.6434
GOTERM_CC_ALL	GO:0030119~AP-type membrane coat adaptor complex	5	0.0057	0.0148376	Bt.13163.1.A1_at, Bt.13163.1.S1_at, Bt.29281.1.S1_at, Bt.23103.1.S1_at, Bt.3079.1.S1_at, Bt.23637.1.S1_s_at, Bt.27280.1.A1_at,	0.999769	0.130226	19.6434
GOTERM_CC_ALL	GO:0030118~clathrin coat	5	0.0057	0.0596189	Bt.13163.1.A1_at, Bt.13163.1.S1_at, Bt.29281.1.S1_at, Bt.23103.1.S1_at, Bt.3079.1.S1_at, Bt.23637.1.S1_s_at, Bt.27280.1.A1_at,	1	0.360491	59.3142
INTERPRO	IPR008968:Clathrin adaptor, mu subunit, C-terminal	3	0.0034	0.0620119	Bt.29281.1.S1_at, Bt.23103.1.S1_at, Bt.3079.1.S1_at,	1	1	68.8925
GOTERM_CC_ALL	GO:0030117~membrane coat	6	0.0069	0.157243	Bt.13163.1.A1_at, Bt.13163.1.S1_at, Bt.29281.1.S1_at, Bt.23103.1.S1_at, Bt.3079.1.S1_at, Bt.23637.1.S1_s_at, Bt.27280.1.A1_at, Bt.5000.1.S1_at,	1	0.62378	91.8145
GOTERM_CC_ALL	GO:0048475~coated membrane	6	0.0069	0.157243	Bt.13163.1.A1_at, Bt.13163.1.S1_at, Bt.29281.1.S1_at, Bt.23103.1.S1_at, Bt.3079.1.S1_at, Bt.23637.1.S1_s_at, Bt.27280.1.A1_at, Bt.5000.1.S1_at,	1	0.62378	91.8145
GOTERM_CC_ALL	GO:0030125~clathrin vesicle coat	3	0.0034	0.212034	Bt.29281.1.S1_at, Bt.23103.1.S1_at, Bt.3079.1.S1_at,	1	0.716047	96.9385
GOTERM_CC_ALL	GO:0030665~clathrin coated vesicle membrane	3	0.0034	0.212034	Bt.29281.1.S1_at, Bt.23103.1.S1_at, Bt.3079.1.S1_at,	1	0.716047	96.9385
GOTERM_CC_ALL	GO:0030120~vesicle coat	4	0.0046	0.227189	Bt.29281.1.S1_at, Bt.23103.1.S1_at, Bt.3079.1.S1_at, Bt.5000.1.S1_at,	1	0.740453	97.6957
GOTERM_CC_ALL	GO:0030662~coated vesicle membrane	4	0.0046	0.266774	Bt.29281.1.S1_at, Bt.23103.1.S1_at, Bt.3079.1.S1_at, Bt.5000.1.S1_at,	1	0.791013	98.9323
GOTERM_CC_ALL	GO:0044433~cytoplasmic vesicle part	5	0.0057	0.357799	Bt.29281.1.S1_at, Bt.23103.1.S1_at, Bt.3079.1.S1_at, Bt.5000.1.S1_at, Bt.23205.1.S1_s_at,	1	0.875571	99.8464
GOTERM_CC_ALL	GO:0012506~vesicle membrane	5	0.0057	0.391315	Bt.29281.1.S1_at, Bt.23103.1.S1_at, Bt.3079.1.S1_at, Bt.5000.1.S1_at, Bt.23205.1.S1_s_at,	1	0.899504	99.9299
GOTERM_CC_ALL	GO:0030135~coated vesicle	5	0.0057	0.441034	Bt.29281.1.S1_at, Bt.23103.1.S1_at, Bt.3079.1.S1_at, Bt.5000.1.S1_at, Bt.23205.1.S1_s_at,	1	0.923068	99.9798
GOTERM_CC_ALL	GO:0030136~clathrin-coated vesicle	4	0.0046	0.446948	Bt.29281.1.S1_at, Bt.23103.1.S1_at, Bt.3079.1.S1_at, Bt.23205.1.S1_s_at,	1	0.925079	99.9828
GOTERM_CC_ALL	GO:0030659~cytoplasmic vesicle membrane	4	0.0046	0.539743	Bt.29281.1.S1_at, Bt.23103.1.S1_at, Bt.3079.1.S1_at, Bt.5000.1.S1_at,	1	0.960948	99.9988
Functional Group 33	Median: 0.09948940955212232	Geo: 0.08481529157241627	Bt.3050.1.S1_at, Bt.6438.1.A1_at, Bt.4834.1.S1_at, Bt.18808.1.S1_at, Bt.4775.1.S1_at, Bt.8131.1.S1_at, Bt.5517.1.S2_at, Bt.1747.1.S1_at, Bt.983.1.S1_at, Bt.2573.1.S1_at, Bt.58.1.S1_at, Bt.2899.1.S1_at, Bt.2899.1.S2_at, Bt.3137.1.S1_at, Bt.4138.1.S1_a_at, Bt.1854.1.S1_at, Bt.3583.1.S1_at, Bt.177.1.S1_at, Bt.21745.1.S1_at,
Category	Term	Count	%	PValue	Genes	Bonferroni	Benjamini	FDR
GOTERM_BP_ALL	GO:0022008~neurogenesis	9	0.0103	0.01956	Bt.3050.1.S1_at, Bt.6438.1.A1_at, Bt.4834.1.S1_at, Bt.18808.1.S1_at, Bt.4775.1.S1_at, Bt.8131.1.S1_at, Bt.5517.1.S2_at, Bt.1747.1.S1_at, Bt.983.1.S1_at,	1	0.492443	30.2208
GOTERM_BP_ALL	GO:0007399~nervous system development	13	0.0149	0.0196226	Bt.2573.1.S1_at, Bt.58.1.S1_at, Bt.2899.1.S1_at, Bt.2899.1.S2_at, Bt.4775.1.S1_at, Bt.5517.1.S2_at, Bt.3137.1.S1_at, Bt.1747.1.S1_at, Bt.6438.1.A1_at, Bt.3050.1.S1_at, Bt.4834.1.S1_at, Bt.18808.1.S1_at, Bt.8131.1.S1_at, Bt.983.1.S1_at,	1	0.486545	30.302
GOTERM_BP_ALL	GO:0000904~cellular morphogenesis during differentiation	6	0.0069	0.0253569	Bt.6438.1.A1_at, Bt.4775.1.S1_at, Bt.4138.1.S1_a_at, Bt.8131.1.S1_at, Bt.5517.1.S2_at, Bt.983.1.S1_at,	1	0.537227	37.3658
GOTERM_BP_ALL	GO:0030182~neuron differentiation	7	0.008	0.0264722	Bt.6438.1.A1_at, Bt.18808.1.S1_at, Bt.4775.1.S1_at, Bt.8131.1.S1_at, Bt.5517.1.S2_at, Bt.1747.1.S1_at, Bt.983.1.S1_at,	1	0.543281	38.6586
GOTERM_BP_ALL	GO:0048812~neurite morphogenesis	5	0.0057	0.0600556	Bt.6438.1.A1_at, Bt.4775.1.S1_at, Bt.8131.1.S1_at, Bt.5517.1.S2_at, Bt.983.1.S1_at,	1	0.751802	67.6384
GOTERM_BP_ALL	GO:0048667~neuron morphogenesis during differentiation	5	0.0057	0.0600556	Bt.6438.1.A1_at, Bt.4775.1.S1_at, Bt.8131.1.S1_at, Bt.5517.1.S2_at, Bt.983.1.S1_at,	1	0.751802	67.6384
GOTERM_BP_ALL	GO:0048699~generation of neurons	7	0.008	0.0717242	Bt.6438.1.A1_at, Bt.18808.1.S1_at, Bt.4775.1.S1_at, Bt.8131.1.S1_at, Bt.5517.1.S2_at, Bt.1747.1.S1_at, Bt.983.1.S1_at,	1	0.791665	74.2246
GOTERM_BP_ALL	GO:0031175~neurite development	5	0.0057	0.0885089	Bt.6438.1.A1_at, Bt.4775.1.S1_at, Bt.8131.1.S1_at, Bt.5517.1.S2_at, Bt.983.1.S1_at,	1	0.835475	81.5137
GOTERM_BP_ALL	GO:0048666~neuron development	5	0.0057	0.11047	Bt.6438.1.A1_at, Bt.4775.1.S1_at, Bt.8131.1.S1_at, Bt.5517.1.S2_at, Bt.983.1.S1_at,	1	0.879796	88.1447
GOTERM_BP_ALL	GO:0048858~cell projection morphogenesis	6	0.0069	0.136967	Bt.6438.1.A1_at, Bt.1854.1.S1_at, Bt.4775.1.S1_at, Bt.8131.1.S1_at, Bt.5517.1.S2_at, Bt.983.1.S1_at,	1	0.916036	93.166
GOTERM_BP_ALL	GO:0032990~cell part morphogenesis	6	0.0069	0.136967	Bt.6438.1.A1_at, Bt.1854.1.S1_at, Bt.4775.1.S1_at, Bt.8131.1.S1_at, Bt.5517.1.S2_at, Bt.983.1.S1_at,	1	0.916036	93.166
GOTERM_BP_ALL	GO:0030030~cell projection organization and biogenesis	6	0.0069	0.136967	Bt.6438.1.A1_at, Bt.1854.1.S1_at, Bt.4775.1.S1_at, Bt.8131.1.S1_at, Bt.5517.1.S2_at, Bt.983.1.S1_at,	1	0.916036	93.166
GOTERM_BP_ALL	GO:0007409~axonogenesis	4	0.0046	0.138038	Bt.6438.1.A1_at, Bt.4775.1.S1_at, Bt.8131.1.S1_at, Bt.5517.1.S2_at,	1	0.916732	93.3188
GOTERM_BP_ALL	GO:0032989~cellular structure morphogenesis	10	0.0115	0.187656	Bt.6438.1.A1_at, Bt.3583.1.S1_at, Bt.4834.1.S1_at, Bt.1854.1.S1_at, Bt.4775.1.S1_at, Bt.4138.1.S1_a_at, Bt.8131.1.S1_at, Bt.5517.1.S2_at, Bt.177.1.S1_at, Bt.983.1.S1_at,	1	0.9588	97.7311
GOTERM_BP_ALL	GO:0000902~cell morphogenesis	10	0.0115	0.187656	Bt.6438.1.A1_at, Bt.3583.1.S1_at, Bt.4834.1.S1_at, Bt.1854.1.S1_at, Bt.4775.1.S1_at, Bt.4138.1.S1_a_at, Bt.8131.1.S1_at, Bt.5517.1.S2_at, Bt.177.1.S1_at, Bt.983.1.S1_at,	1	0.9588	97.7311
GOTERM_BP_ALL	GO:0007610~behavior	4	0.0046	0.881038	Bt.21745.1.S1_at, Bt.4775.1.S1_at, Bt.5517.1.S2_at, Bt.983.1.S1_at,	1	1	100
Functional Group 34	Median: 0.18111197063306006	Geo: 0.0874779505172728	Bt.4697.1.S1_at, Bt.21493.1.S1_at, Bt.13163.1.A1_at, Bt.13163.1.S1_at, Bt.5049.1.S1_at, Bt.20230.1.S1_at, Bt.5000.1.S1_at, Bt.5308.1.S1_at,
Category	Term	Count	%	PValue	Genes	Bonferroni	Benjamini	FDR
INTERPRO	IPR011989:Armadillo-like helical	7	0.008	0.0171003	Bt.4697.1.S1_at, Bt.21493.1.S1_at, Bt.13163.1.A1_at, Bt.13163.1.S1_at, Bt.5049.1.S1_at, Bt.20230.1.S1_at, Bt.5000.1.S1_at, Bt.5308.1.S1_at,	1	1	26.9931
SMART	SM00185:ARM	3	0.0034	0.181112	Bt.4697.1.S1_at, Bt.20230.1.S1_at, Bt.5308.1.S1_at,	1	0.99995	94.3531
INTERPRO	IPR000225:Armadillo	3	0.0034	0.216145	Bt.4697.1.S1_at, Bt.20230.1.S1_at, Bt.5308.1.S1_at,	1	1	98.8229
Functional Group 35	Median: 0.10508045444544747	Geo: 0.10820373680601186	Bt.2573.1.S1_at, Bt.5141.1.S1_at, Bt.5141.1.S2_at, Bt.21493.1.S1_at, Bt.5449.1.S1_at, Bt.13220.1.S1_at, Bt.234.1.S1_at, Bt.58.1.S1_at, Bt.12631.3.S1_at, Bt.4138.1.S1_a_at, Bt.5534.1.S1_at, Bt.236.1.S1_at, Bt.6438.1.A1_at, Bt.18230.1.S1_a_at, Bt.4834.1.S1_at, Bt.18808.1.S1_at, Bt.4641.1.S1_at, Bt.983.1.S1_at, Bt.4816.1.S1_at, Bt.4314.1.S1_at, Bt.1854.1.S1_at, Bt.4775.1.S1_at, Bt.5517.1.S2_at, Bt.1…
Category	Term	Count	%	PValue	Genes	Bonferroni	Benjamini	FDR
GOTERM_BP_ALL	GO:0008283~cell proliferation	17	0.0195	0.0130827	Bt.2573.1.S1_at, Bt.5141.1.S1_at, Bt.5141.1.S2_at, Bt.21493.1.S1_at, Bt.5449.1.S1_at, Bt.13220.1.S1_at, Bt.234.1.S1_at, Bt.58.1.S1_at, Bt.12631.3.S1_at, Bt.4138.1.S1_a_at, Bt.5534.1.S1_at, Bt.236.1.S1_at, Bt.6438.1.A1_at, Bt.18230.1.S1_a_at, Bt.4834.1.S1_at, Bt.18808.1.S1_at, Bt.4641.1.S1_at, Bt.983.1.S1_at,	1	0.395925	21.3284
GOTERM_BP_ALL	GO:0008284~positive regulation of cell proliferation	7	0.008	0.0855735	Bt.6438.1.A1_at, Bt.5141.1.S1_at, Bt.5141.1.S2_at, Bt.4834.1.S1_at, Bt.234.1.S1_at, Bt.58.1.S1_at, Bt.18808.1.S1_at, Bt.4641.1.S1_at,	1	0.828419	80.3986
GOTERM_BP_ALL	GO:0009653~anatomical structure morphogenesis	21	0.0241	0.10153	Bt.2573.1.S1_at, Bt.4816.1.S1_at, Bt.5141.1.S1_at, Bt.5141.1.S2_at, Bt.13220.1.S1_at, Bt.4314.1.S1_at, Bt.234.1.S1_at, Bt.1854.1.S1_at, Bt.4775.1.S1_at, Bt.4138.1.S1_a_at, Bt.5517.1.S2_at, Bt.16068.1.A1_at, Bt.177.1.S1_at, Bt.1747.1.S1_at, Bt.9153.1.S1_at, Bt.13134.1.A1_at, Bt.13134.1.S1_at, Bt.6438.1.A1_at, Bt.3583.1.S1_at, Bt.4834.1.S1_at, Bt.18808.1.S1_at, Bt.8131.1.S1_at, Bt.4641.1.S1_at, Bt.…	1	0.865057	85.776
GOTERM_BP_ALL	GO:0042127~regulation of cell proliferation	10	0.0115	0.108631	Bt.2573.1.S1_at, Bt.6438.1.A1_at, Bt.5141.1.S1_at, Bt.5141.1.S2_at, Bt.5449.1.S1_at, Bt.4834.1.S1_at, Bt.13220.1.S1_at, Bt.234.1.S1_at, Bt.58.1.S1_at, Bt.18808.1.S1_at, Bt.4641.1.S1_at,	1	0.87804	87.6902
GOTERM_BP_ALL	GO:0048518~positive regulation of biological process	19	0.0218	0.330064	Bt.23179.1.S1_at, Bt.23179.1.S2_at, Bt.5141.1.S1_at, Bt.5141.1.S2_at, Bt.13220.1.S1_at, Bt.234.1.S1_at, Bt.58.1.S1_at, Bt.29570.1.S1_at, Bt.4775.1.S1_at, Bt.1747.1.S1_at, Bt.1794.1.S1_a_at, Bt.9153.1.S1_at, Bt.13134.1.A1_at, Bt.13134.1.S1_at, Bt.5478.1.S1_at, Bt.6438.1.A1_at, Bt.4834.1.S1_at, Bt.8724.1.S1_at, Bt.22840.1.S1_a_at, Bt.18808.1.S1_at, Bt.2353.1.S1_at, Bt.4641.1.S1_at, Bt.983.1.S1_at,	1	0.992584	99.9322
GOTERM_BP_ALL	GO:0048522~positive regulation of cellular process	15	0.0172	0.393794	Bt.5141.1.S1_at, Bt.5141.1.S2_at, Bt.13220.1.S1_at, Bt.234.1.S1_at, Bt.58.1.S1_at, Bt.4775.1.S1_at, Bt.1747.1.S1_at, Bt.1794.1.S1_a_at, Bt.9153.1.S1_at, Bt.13134.1.A1_at, Bt.13134.1.S1_at, Bt.6438.1.A1_at, Bt.4834.1.S1_at, Bt.8724.1.S1_at, Bt.18808.1.S1_at, Bt.2353.1.S1_at, Bt.4641.1.S1_at, Bt.983.1.S1_at,	1	0.997056	99.989
Functional Group 36	Median: 0.151338953281675	Geo: 0.1094919383301863	Bt.5449.1.S1_at, Bt.4834.1.S1_at, Bt.714.1.S1_at, Bt.23182.1.S1_at, Bt.10609.2.A1_at, Bt.499.1.S1_a_at, Bt.20584.1.S1_at, Bt.621.1.S1_at, Bt.3562.1.S1_at, Bt.3786.1.S1_a_at, Bt.19709.1.S1_at, Bt.12559.1.S1_at, Bt.4798.1.S2_at, Bt.22854.2.S1_at, Bt.11465.1.S1_at, Bt.7283.1.S1_at, Bt.5141.1.S1_at, Bt.5141.1.S2_at, Bt.3005.1.S1_at, Bt.983.1.S1_at,
Category	Term	Count	%	PValue	Genes	Bonferroni	Benjamini	FDR
GOTERM_BP_ALL	GO:0006694~steroid biosynthetic process	8	0.0092	0.0117545	Bt.5449.1.S1_at, Bt.4834.1.S1_at, Bt.714.1.S1_at, Bt.23182.1.S1_at, Bt.10609.2.A1_at, Bt.499.1.S1_a_at, Bt.20584.1.S1_at, Bt.621.1.S1_at,	1	0.384983	19.3772
GOTERM_BP_ALL	GO:0016125~sterol metabolic process	6	0.0069	0.0296775	Bt.5449.1.S1_at, Bt.714.1.S1_at, Bt.23182.1.S1_at, Bt.3562.1.S1_at, Bt.3786.1.S1_a_at, Bt.621.1.S1_at,	1	0.57576	42.2351
GOTERM_BP_ALL	GO:0016126~sterol biosynthetic process	4	0.0046	0.0665753	Bt.5449.1.S1_at, Bt.714.1.S1_at, Bt.23182.1.S1_at, Bt.621.1.S1_at,	1	0.774569	71.4921
SP_PIR_KEYWORDS	lipid synthesis	7	0.008	0.0743614	Bt.19709.1.S1_at, Bt.12559.1.S1_at, Bt.5449.1.S1_at, Bt.23182.1.S1_at, Bt.4798.1.S2_at, Bt.22854.2.S1_at, Bt.621.1.S1_at,	1	0.802635	69.0535
SP_PIR_KEYWORDS	cholesterol biosynthesis	3	0.0034	0.13055	Bt.5449.1.S1_at, Bt.23182.1.S1_at, Bt.621.1.S1_at,	1	0.872092	88.0383
KEGG_PATHWAY	bta00100:Biosynthesis of steroids	4	0.0046	0.151339	Bt.5449.1.S1_at, Bt.11465.1.S1_at, Bt.23182.1.S1_at, Bt.621.1.S1_at,	1	0.993652	86.8729
SP_PIR_KEYWORDS	sterol biosynthesis	3	0.0034	0.170155	Bt.5449.1.S1_at, Bt.23182.1.S1_at, Bt.621.1.S1_at,	1	0.902075	94.1055
GOTERM_BP_ALL	GO:0008203~cholesterol metabolic process	4	0.0046	0.189334	Bt.5449.1.S1_at, Bt.23182.1.S1_at, Bt.3562.1.S1_at, Bt.621.1.S1_at,	1	0.958895	97.8149
GOTERM_BP_ALL	GO:0006695~cholesterol biosynthetic process	3	0.0034	0.197541	Bt.5449.1.S1_at, Bt.23182.1.S1_at, Bt.621.1.S1_at,	1	0.963158	98.1846
SP_PIR_KEYWORDS	steroid biosynthesis	3	0.0034	0.253409	Bt.5449.1.S1_at, Bt.23182.1.S1_at, Bt.621.1.S1_at,	1	0.951456	98.8156
GOTERM_BP_ALL	GO:0006066~alcohol metabolic process	10	0.0115	0.492753	Bt.7283.1.S1_at, Bt.5141.1.S1_at, Bt.5141.1.S2_at, Bt.5449.1.S1_at, Bt.714.1.S1_at, Bt.23182.1.S1_at, Bt.3005.1.S1_at, Bt.3562.1.S1_at, Bt.3786.1.S1_a_at, Bt.621.1.S1_at, Bt.983.1.S1_at,	1	0.999318	99.9996
Functional Group 37	Median: 0.11247769923227915	Geo: 0.1121199182725845	Bt.6074.1.S1_at, Bt.5141.1.S1_at, Bt.5141.1.S2_at, Bt.20230.1.S1_at, Bt.13744.1.A1_at, Bt.28231.1.S1_at, Bt.24343.1.A1_at, Bt.4768.1.S2_at, Bt.12177.1.S1_at, Bt.714.1.S1_at, Bt.6440.1.S1_at, Bt.5107.1.S1_at, Bt.23205.1.S1_s_at, Bt.4107.1.S1_at, Bt.3210.1.S1_at, Bt.11241.1.S1_at, Bt.13021.1.S1_at, Bt.7236.1.S1_at, Bt.3583.1.S1_at, Bt.800.1.S1_at, Bt.177.1.S1_at, Bt.16441.1.A1_at, Bt.8924.1.S1_at, …
Category	Term	Count	%	PValue	Genes	Bonferroni	Benjamini	FDR
GOTERM_CC_ALL	GO:0043296~apical junction complex	8	0.0092	0.00936519	Bt.6074.1.S1_at, Bt.5141.1.S1_at, Bt.5141.1.S2_at, Bt.20230.1.S1_at, Bt.13744.1.A1_at, Bt.28231.1.S1_at, Bt.24343.1.A1_at, Bt.4768.1.S2_at, Bt.12177.1.S1_at,	0.994852	0.0963662	12.8602
GOTERM_CC_ALL	GO:0016327~apicolateral plasma membrane	8	0.0092	0.00936519	Bt.6074.1.S1_at, Bt.5141.1.S1_at, Bt.5141.1.S2_at, Bt.20230.1.S1_at, Bt.13744.1.A1_at, Bt.28231.1.S1_at, Bt.24343.1.A1_at, Bt.4768.1.S2_at, Bt.12177.1.S1_at,	0.994852	0.0963662	12.8602
SP_PIR_KEYWORDS	tight junction	5	0.0057	0.0239787	Bt.6074.1.S1_at, Bt.13744.1.A1_at, Bt.24343.1.A1_at, Bt.4768.1.S2_at, Bt.12177.1.S1_at,	1	0.572363	30.8166
GOTERM_BP_ALL	GO:0016338~calcium-independent cell-cell adhesion	3	0.0034	0.0410103	Bt.6074.1.S1_at, Bt.24343.1.A1_at, Bt.12177.1.S1_at,	1	0.663583	53.3638
GOTERM_CC_ALL	GO:0005923~tight junction	6	0.0069	0.053422	Bt.6074.1.S1_at, Bt.13744.1.A1_at, Bt.28231.1.S1_at, Bt.24343.1.A1_at, Bt.4768.1.S2_at, Bt.12177.1.S1_at,	1	0.332717	55.2107
GOTERM_CC_ALL	GO:0030054~cell junction	14	0.016	0.0650142	Bt.5141.1.S1_at, Bt.5141.1.S2_at, Bt.714.1.S1_at, Bt.6440.1.S1_at, Bt.28231.1.S1_at, Bt.4768.1.S2_at, Bt.5107.1.S1_at, Bt.23205.1.S1_s_at, Bt.4107.1.S1_at, Bt.3210.1.S1_at, Bt.6074.1.S1_at, Bt.20230.1.S1_at, Bt.13744.1.A1_at, Bt.24343.1.A1_at, Bt.12177.1.S1_at,	1	0.379062	62.5989
GOTERM_CC_ALL	GO:0005911~intercellular junction	8	0.0092	0.0771293	Bt.6074.1.S1_at, Bt.5141.1.S1_at, Bt.5141.1.S2_at, Bt.20230.1.S1_at, Bt.13744.1.A1_at, Bt.28231.1.S1_at, Bt.24343.1.A1_at, Bt.4768.1.S2_at, Bt.12177.1.S1_at,	1	0.421987	69.0957
SP_PIR_KEYWORDS	cell junction	11	0.0126	0.147826	Bt.6074.1.S1_at, Bt.714.1.S1_at, Bt.20230.1.S1_at, Bt.13744.1.A1_at, Bt.24343.1.A1_at, Bt.5107.1.S1_at, Bt.4768.1.S2_at, Bt.23205.1.S1_s_at, Bt.12177.1.S1_at, Bt.4107.1.S1_at, Bt.11241.1.S1_at, Bt.13021.1.S1_at,	1	0.882075	91.1797
INTERPRO	IPR006187:Claudin	3	0.0034	0.258865	Bt.6074.1.S1_at, Bt.24343.1.A1_at, Bt.12177.1.S1_at,	1	1	99.5765
INTERPRO	IPR004031:PMP-22/EMP/MP20/Claudin	3	0.0034	0.34401	Bt.6074.1.S1_at, Bt.24343.1.A1_at, Bt.12177.1.S1_at,	1	1	99.9543
KEGG_PATHWAY	bta04670:Leukocyte transendothelial migration	8	0.0092	0.554557	Bt.3210.1.S1_at, Bt.6074.1.S1_at, Bt.7236.1.S1_at, Bt.3583.1.S1_at, Bt.800.1.S1_at, Bt.24343.1.A1_at, Bt.4768.1.S2_at, Bt.12177.1.S1_at,	1	0.995219	99.9955
GOTERM_BP_ALL	GO:0016337~cell-cell adhesion	7	0.008	0.602181	Bt.6074.1.S1_at, Bt.24343.1.A1_at, Bt.177.1.S1_at, Bt.12177.1.S1_at, Bt.16441.1.A1_at, Bt.4107.1.S1_at, Bt.11241.1.S1_at, Bt.13021.1.S1_at,	1	0.999877	100
KEGG_PATHWAY	bta04530:Tight junction	7	0.008	0.656182	Bt.3210.1.S1_at, Bt.6074.1.S1_at, Bt.8924.1.S1_at, Bt.1.1.S1_at, Bt.24343.1.A1_at, Bt.4768.1.S2_at, Bt.12177.1.S1_at,	1	0.991912	99.9998
KEGG_PATHWAY	bta04514:Cell adhesion molecules (CAMs)	8	0.0092	0.744329	Bt.6074.1.S1_at, Bt.4943.3.S1_a_at, Bt.8131.1.S1_at, Bt.24343.1.A1_at, Bt.11462.1.S1_at, Bt.4768.1.S2_at, Bt.12177.1.S1_at, Bt.11241.1.S1_at, Bt.13021.1.S1_at,	1	0.995852	100
Functional Group 38	Median: 0.09302128766063122	Geo: 0.11558102211877394	Bt.1990.1.S1_at, Bt.5131.1.S1_at, Bt.22840.1.S1_a_at, Bt.4322.1.A1_at, Bt.1576.1.S1_at, Bt.28064.2.S1_at, Bt.9929.1.A1_at, Bt.868.1.S1_a_at, Bt.7157.1.S1_at, Bt.28686.2.S1_at,
Category	Term	Count	%	PValue	Genes	Bonferroni	Benjamini	FDR
GOTERM_CC_ALL	GO:0000323~lytic vacuole	9	0.0103	0.0930213	Bt.1990.1.S1_at, Bt.5131.1.S1_at, Bt.22840.1.S1_a_at, Bt.4322.1.A1_at, Bt.1576.1.S1_at, Bt.28064.2.S1_at, Bt.9929.1.A1_at, Bt.868.1.S1_a_at, Bt.7157.1.S1_at, Bt.28686.2.S1_at,	1	0.470473	76.0307
GOTERM_CC_ALL	GO:0005764~lysosome	9	0.0103	0.0930213	Bt.1990.1.S1_at, Bt.5131.1.S1_at, Bt.22840.1.S1_a_at, Bt.4322.1.A1_at, Bt.1576.1.S1_at, Bt.28064.2.S1_at, Bt.9929.1.A1_at, Bt.868.1.S1_a_at, Bt.7157.1.S1_at, Bt.28686.2.S1_at,	1	0.470473	76.0307
GOTERM_CC_ALL	GO:0005773~vacuole	9	0.0103	0.178441	Bt.1990.1.S1_at, Bt.5131.1.S1_at, Bt.22840.1.S1_a_at, Bt.4322.1.A1_at, Bt.1576.1.S1_at, Bt.28064.2.S1_at, Bt.9929.1.A1_at, Bt.868.1.S1_a_at, Bt.7157.1.S1_at, Bt.28686.2.S1_at,	1	0.660101	94.3612
Functional Group 39	Median: 0.2716063854112808	Geo: 0.11654401609440881	Bt.5141.1.S1_at, Bt.5141.1.S2_at, Bt.714.1.S1_at, Bt.1854.1.S1_at, Bt.20275.1.S1_at, Bt.4775.1.S1_at, Bt.23205.1.S1_s_at, Bt.177.1.S1_at, Bt.6333.1.S1_at, Bt.3583.1.S1_at, Bt.8191.1.S1_at, Bt.28699.1.S1_at, Bt.8131.1.S1_at, Bt.28119.1.S1_at, Bt.12663.1.S1_at,
Category	Term	Count	%	PValue	Genes	Bonferroni	Benjamini	FDR
GOTERM_CC_ALL	GO:0042995~cell projection	13	0.0149	0.0124732	Bt.5141.1.S1_at, Bt.5141.1.S2_at, Bt.714.1.S1_at, Bt.1854.1.S1_at, Bt.20275.1.S1_at, Bt.4775.1.S1_at, Bt.23205.1.S1_s_at, Bt.177.1.S1_at, Bt.6333.1.S1_at, Bt.3583.1.S1_at, Bt.8191.1.S1_at, Bt.28699.1.S1_at, Bt.8131.1.S1_at, Bt.28119.1.S1_at,	0.999114	0.11997	16.7755
GOTERM_CC_ALL	GO:0031252~leading edge	4	0.0046	0.0616355	Bt.6333.1.S1_at, Bt.28699.1.S1_at, Bt.4775.1.S1_at, Bt.177.1.S1_at,	1	0.366652	60.5721
GOTERM_BP_ALL	GO:0030036~actin cytoskeleton organization and biogenesis	6	0.0069	0.271606	Bt.6333.1.S1_at, Bt.3583.1.S1_at, Bt.12663.1.S1_at, Bt.20275.1.S1_at, Bt.28699.1.S1_at, Bt.177.1.S1_at,	1	0.985071	99.6889
GOTERM_BP_ALL	GO:0030029~actin filament-based process	6	0.0069	0.271606	Bt.6333.1.S1_at, Bt.3583.1.S1_at, Bt.12663.1.S1_at, Bt.20275.1.S1_at, Bt.28699.1.S1_at, Bt.177.1.S1_at,	1	0.985071	99.6889
GOTERM_BP_ALL	GO:0008154~actin polymerization and/or depolymerization	3	0.0034	0.379106	Bt.20275.1.S1_at, Bt.28699.1.S1_at, Bt.177.1.S1_at,	1	0.996332	99.983
Functional Group 40	Median: 0.11649713849587767	Geo: 0.12096809304705422	Bt.436.1.S1_at, Bt.8421.1.A1_at, Bt.9657.1.S1_at, Bt.17036.1.A1_s_at, Bt.2723.1.A1_at, Bt.20141.1.S1_at, Bt.12885.1.S1_at, Bt.16068.1.A1_at, Bt.20193.1.S1_at, Bt.1552.1.S1_at, Bt.27064.1.A1_at, Bt.9153.1.S1_at, Bt.13134.1.A1_at, Bt.13134.1.S1_at, Bt.1316.1.S1_at, Bt.1316.1.S2_at, Bt.4834.1.S1_at, Bt.8624.1.S1_at, Bt.21918.2.S1_at, Bt.22532.2.S1_at, Bt.3277.1.S1_at, Bt.23098.2.S1_at,
Category	Term	Count	%	PValue	Genes	Bonferroni	Benjamini	FDR
GOTERM_BP_ALL	GO:0006520~amino acid metabolic process	17	0.0195	0.0209573	Bt.436.1.S1_at, Bt.8421.1.A1_at, Bt.9657.1.S1_at, Bt.17036.1.A1_s_at, Bt.2723.1.A1_at, Bt.20141.1.S1_at, Bt.12885.1.S1_at, Bt.16068.1.A1_at, Bt.20193.1.S1_at, Bt.1552.1.S1_at, Bt.27064.1.A1_at, Bt.9153.1.S1_at, Bt.13134.1.A1_at, Bt.13134.1.S1_at, Bt.1316.1.S1_at, Bt.1316.1.S2_at, Bt.4834.1.S1_at, Bt.8624.1.S1_at, Bt.21918.2.S1_at, Bt.22532.2.S1_at, Bt.3277.1.S1_at,	1	0.489165	32.0104
GOTERM_MF_ALL	GO:0016876~ligase activity, forming aminoacyl-tRNA and related compounds	6	0.0069	0.10692	Bt.1552.1.S1_at, Bt.27064.1.A1_at, Bt.17036.1.A1_s_at, Bt.22532.2.S1_at, Bt.21918.2.S1_at, Bt.20193.1.S1_at,	1	0.945278	85.4341
GOTERM_MF_ALL	GO:0016875~ligase activity, forming carbon-oxygen bonds	6	0.0069	0.10692	Bt.1552.1.S1_at, Bt.27064.1.A1_at, Bt.17036.1.A1_s_at, Bt.22532.2.S1_at, Bt.21918.2.S1_at, Bt.20193.1.S1_at,	1	0.945278	85.4341
GOTERM_MF_ALL	GO:0004812~aminoacyl-tRNA ligase activity	6	0.0069	0.10692	Bt.1552.1.S1_at, Bt.27064.1.A1_at, Bt.17036.1.A1_s_at, Bt.22532.2.S1_at, Bt.21918.2.S1_at, Bt.20193.1.S1_at,	1	0.945278	85.4341
GOTERM_BP_ALL	GO:0043039~tRNA aminoacylation	6	0.0069	0.116497	Bt.1552.1.S1_at, Bt.27064.1.A1_at, Bt.17036.1.A1_s_at, Bt.22532.2.S1_at, Bt.21918.2.S1_at, Bt.20193.1.S1_at,	1	0.889821	89.5257
GOTERM_BP_ALL	GO:0043038~amino acid activation	6	0.0069	0.116497	Bt.1552.1.S1_at, Bt.27064.1.A1_at, Bt.17036.1.A1_s_at, Bt.22532.2.S1_at, Bt.21918.2.S1_at, Bt.20193.1.S1_at,	1	0.889821	89.5257
GOTERM_BP_ALL	GO:0006418~tRNA aminoacylation for protein translation	6	0.0069	0.116497	Bt.1552.1.S1_at, Bt.27064.1.A1_at, Bt.17036.1.A1_s_at, Bt.22532.2.S1_at, Bt.21918.2.S1_at, Bt.20193.1.S1_at,	1	0.889821	89.5257
INTERPRO	IPR006195:Aminoacyl-tRNA synthetase, class II	3	0.0034	0.13377	Bt.1552.1.S1_at, Bt.22532.2.S1_at, Bt.20193.1.S1_at,	1	1	92.7156
KEGG_PATHWAY	bta00970:Aminoacyl-tRNA biosynthesis	4	0.0046	0.176233	Bt.1552.1.S1_at, Bt.17036.1.A1_s_at, Bt.21918.2.S1_at, Bt.20193.1.S1_at,	1	0.972306	90.918
GOTERM_BP_ALL	GO:0006399~tRNA metabolic process	7	0.008	0.287599	Bt.1552.1.S1_at, Bt.27064.1.A1_at, Bt.17036.1.A1_s_at, Bt.22532.2.S1_at, Bt.21918.2.S1_at, Bt.23098.2.S1_at, Bt.20193.1.S1_at,	1	0.987648	99.7924
SP_PIR_KEYWORDS	aminoacyl-tRNA synthetase	3	0.0034	0.295592	Bt.1552.1.S1_at, Bt.17036.1.A1_s_at, Bt.22532.2.S1_at,	1	0.966248	99.5101
Functional Group 41	Median: 0.14738982545587775	Geo: 0.12507743766302254	Bt.250.1.S1_at, Bt.18230.1.S1_a_at, Bt.26992.1.A1_at, Bt.12631.3.S1_at, Bt.1747.1.S1_at, Bt.13220.1.S1_at, Bt.177.1.S1_at,
Category	Term	Count	%	PValue	Genes	Bonferroni	Benjamini	FDR
GOTERM_BP_ALL	GO:0001701~in utero embryonic development	5	0.0057	0.0518434	Bt.250.1.S1_at, Bt.18230.1.S1_a_at, Bt.26992.1.A1_at, Bt.12631.3.S1_at, Bt.1747.1.S1_at,	1	0.71304	62.0818
GOTERM_BP_ALL	GO:0009792~embryonic development ending in birth or egg hatching	5	0.0057	0.14739	Bt.250.1.S1_at, Bt.18230.1.S1_a_at, Bt.26992.1.A1_at, Bt.12631.3.S1_at, Bt.1747.1.S1_at,	1	0.92688	94.5229
GOTERM_BP_ALL	GO:0043009~chordate embryonic development	5	0.0057	0.14739	Bt.250.1.S1_at, Bt.18230.1.S1_a_at, Bt.26992.1.A1_at, Bt.12631.3.S1_at, Bt.1747.1.S1_at,	1	0.92688	94.5229
GOTERM_BP_ALL	GO:0009790~embryonic development	7	0.008	0.217314	Bt.250.1.S1_at, Bt.18230.1.S1_a_at, Bt.26992.1.A1_at, Bt.13220.1.S1_at, Bt.12631.3.S1_at, Bt.177.1.S1_at, Bt.1747.1.S1_at,	1	0.973387	98.8476
Functional Group 42	Median: 0.11820761112779422	Geo: 0.13097071017151451	Bt.461.1.S1_at, Bt.24676.2.A1_at, Bt.23103.1.S1_at, Bt.9182.1.S1_at, Bt.5000.1.S1_at, Bt.927.1.S1_at, Bt.5308.1.S1_at, Bt.11189.1.S1_at, Bt.5141.1.S1_at, Bt.5141.1.S2_at, Bt.4834.1.S1_at, Bt.9051.1.S1_at, Bt.23205.1.S1_s_at, Bt.16079.1.S1_at, Bt.13163.1.A1_at, Bt.13163.1.S1_at, Bt.29281.1.S1_at, Bt.23637.1.S1_s_at, Bt.27280.1.A1_at, Bt.1794.1.S1_a_at, Bt.29698.1.A1_at, Bt.3079.1.S1_at, Bt.3562.1.…
Category	Term	Count	%	PValue	Genes	Bonferroni	Benjamini	FDR
GOTERM_BP_ALL	GO:0048193~Golgi vesicle transport	7	0.008	0.0200211	Bt.461.1.S1_at, Bt.24676.2.A1_at, Bt.23103.1.S1_at, Bt.9182.1.S1_at, Bt.5000.1.S1_at, Bt.927.1.S1_at, Bt.5308.1.S1_at,	1	0.483284	30.8163
GOTERM_BP_ALL	GO:0045045~secretory pathway	12	0.0137	0.0258876	Bt.11189.1.S1_at, Bt.5141.1.S1_at, Bt.5141.1.S2_at, Bt.4834.1.S1_at, Bt.461.1.S1_at, Bt.24676.2.A1_at, Bt.23103.1.S1_at, Bt.9182.1.S1_at, Bt.9051.1.S1_at, Bt.5000.1.S1_at, Bt.927.1.S1_at, Bt.23205.1.S1_s_at, Bt.5308.1.S1_at,	1	0.538341	37.9841
SP_PIR_KEYWORDS	er-golgi transport	7	0.008	0.0383078	Bt.461.1.S1_at, Bt.24676.2.A1_at, Bt.23103.1.S1_at, Bt.9182.1.S1_at, Bt.5000.1.S1_at, Bt.927.1.S1_at, Bt.5308.1.S1_at,	1	0.62842	44.7282
GOTERM_BP_ALL	GO:0016192~vesicle-mediated transport	17	0.0195	0.0629756	Bt.5141.1.S1_at, Bt.5141.1.S2_at, Bt.16079.1.S1_at, Bt.13163.1.A1_at, Bt.13163.1.S1_at, Bt.29281.1.S1_at, Bt.24676.2.A1_at, Bt.461.1.S1_at, Bt.23637.1.S1_s_at, Bt.27280.1.A1_at, Bt.5000.1.S1_at, Bt.927.1.S1_at, Bt.5308.1.S1_at, Bt.1794.1.S1_a_at, Bt.29698.1.A1_at, Bt.4834.1.S1_at, Bt.23103.1.S1_at, Bt.9182.1.S1_at, Bt.3079.1.S1_at, Bt.3562.1.S1_at,	1	0.757246	69.4216
GOTERM_BP_ALL	GO:0032940~secretion by cell	12	0.0137	0.0764171	Bt.11189.1.S1_at, Bt.5141.1.S1_at, Bt.5141.1.S2_at, Bt.4834.1.S1_at, Bt.461.1.S1_at, Bt.24676.2.A1_at, Bt.23103.1.S1_at, Bt.9182.1.S1_at, Bt.9051.1.S1_at, Bt.5000.1.S1_at, Bt.927.1.S1_at, Bt.23205.1.S1_s_at, Bt.5308.1.S1_at,	1	0.804864	76.4977
SP_PIR_KEYWORDS	golgi apparatus	15	0.0172	0.0948269	Bt.5141.1.S1_at, Bt.5141.1.S2_at, Bt.29281.1.S1_at, Bt.24676.2.A1_at, Bt.4831.1.S1_at, Bt.461.1.S1_at, Bt.1854.1.S1_at, Bt.2582.1.S1_at, Bt.28224.1.A1_at, Bt.5000.1.S1_at, Bt.927.1.S1_at, Bt.5308.1.S1_at, Bt.26992.1.A1_at, Bt.23103.1.S1_at, Bt.9182.1.S1_at, Bt.1576.1.S1_at, Bt.1946.1.S1_at,	1	0.810669	77.9593
GOTERM_BP_ALL	GO:0006888~ER to Golgi vesicle-mediated transport	5	0.0057	0.0992055	Bt.461.1.S1_at, Bt.24676.2.A1_at, Bt.9182.1.S1_at, Bt.927.1.S1_at, Bt.5308.1.S1_at,	1	0.86304	85.0905
SP_PIR_KEYWORDS	protein transport	14	0.016	0.107602	Bt.24676.2.A1_at, Bt.461.1.S1_at, Bt.29281.1.S1_at, Bt.5000.1.S1_at, Bt.927.1.S1_at, Bt.5308.1.S1_at, Bt.13592.1.A1_at, Bt.7785.1.S1_at, Bt.23103.1.S1_at, Bt.13218.2.S1_at, Bt.9637.1.S1_at, Bt.9182.1.S1_at, Bt.1576.1.S1_at, Bt.10880.1.S1_at,	1	0.831414	82.2366
GOTERM_CC_ALL	GO:0005794~Golgi apparatus	20	0.0229	0.111698	Bt.13163.1.A1_at, Bt.13163.1.S1_at, Bt.5141.1.S1_at, Bt.5141.1.S2_at, Bt.16079.1.S1_at, Bt.29281.1.S1_at, Bt.24676.2.A1_at, Bt.461.1.S1_at, Bt.19522.1.S1_at, Bt.1854.1.S1_at, Bt.24256.1.S1_at, Bt.2582.1.S1_at, Bt.28224.1.A1_at, Bt.23637.1.S1_s_at, Bt.27280.1.A1_at, Bt.5000.1.S1_at, Bt.5107.1.S1_at, Bt.927.1.S1_at, Bt.5308.1.S1_at, Bt.26992.1.A1_at, Bt.23103.1.S1_at, Bt.9182.1.S1_at, Bt.1576.1.S1_…	1	0.513716	82.3212
SMART	SM00177:ARF	3	0.0034	0.124717	Bt.461.1.S1_at, Bt.9182.1.S1_at, Bt.927.1.S1_at,	1	0.999998	85.2817
GOTERM_BP_ALL	GO:0046903~secretion	12	0.0137	0.179408	Bt.11189.1.S1_at, Bt.5141.1.S1_at, Bt.5141.1.S2_at, Bt.4834.1.S1_at, Bt.461.1.S1_at, Bt.24676.2.A1_at, Bt.23103.1.S1_at, Bt.9182.1.S1_at, Bt.9051.1.S1_at, Bt.5000.1.S1_at, Bt.927.1.S1_at, Bt.23205.1.S1_s_at, Bt.5308.1.S1_at,	1	0.953229	97.2726
INTERPRO	IPR006689:ARF/SAR superfamily	4	0.0046	0.192582	Bt.461.1.S1_at, Bt.24676.2.A1_at, Bt.9182.1.S1_at, Bt.927.1.S1_at,	1	1	97.9796
PIR_SUPERFAMILY	PIRSF001711:ADP-ribosylation factor	4	0.0046	0.210608	Bt.461.1.S1_at, Bt.24676.2.A1_at, Bt.9182.1.S1_at, Bt.927.1.S1_at,	1	1	97.9887
INTERPRO	IPR006688:ADP-ribosylation factor	3	0.0034	0.216145	Bt.461.1.S1_at, Bt.9182.1.S1_at, Bt.927.1.S1_at,	1	1	98.8229
SP_PIR_KEYWORDS	myristate	6	0.0069	0.348743	Bt.9643.1.S1_at, Bt.13592.1.A1_at, Bt.461.1.S1_at, Bt.9182.1.S1_at, Bt.927.1.S1_at, Bt.212.1.S1_at,	1	0.979584	99.8511
SP_PIR_KEYWORDS	GTP-binding	11	0.0126	0.514762	Bt.3573.1.S2_at, Bt.3573.1.S1_at, Bt.27901.1.S1_at, Bt.461.1.S1_at, Bt.24676.2.A1_at, Bt.7323.1.S1_at, Bt.9182.1.S1_at, Bt.20141.1.S1_at, Bt.2898.3.S1_at, Bt.14150.1.S1_at, Bt.20852.1.A1_at, Bt.927.1.S1_at,	1	0.996059	99.9983
INTERPRO	IPR005225:Small GTP-binding protein domain	6	0.0069	0.516931	Bt.27901.1.S1_at, Bt.461.1.S1_at, Bt.24676.2.A1_at, Bt.7323.1.S1_at, Bt.9182.1.S1_at, Bt.927.1.S1_at,	1	1	99.9998
INTERPRO	IPR001806:Ras GTPase	5	0.0057	0.653771	Bt.27901.1.S1_at, Bt.461.1.S1_at, Bt.24676.2.A1_at, Bt.9182.1.S1_at, Bt.927.1.S1_at,	1	1	100
Functional Group 43	Median: 0.1421700307624143	Geo: 0.13886880906382928	Bt.265.1.S1_at, Bt.442.1.S1_at, Bt.13170.1.S1_at, Bt.4637.1.A1_a_at, Bt.9826.1.S1_at, Bt.2541.1.S1_at, Bt.77.1.S1_at, Bt.4540.1.S1_at, Bt.75.1.S1_at, Bt.7194.1.S1_at, Bt.404.1.S1_at, Bt.4970.1.S1_at, Bt.5134.1.S1_at, Bt.4434.1.A1_at, Bt.1280.2.S1_a_at, Bt.11714.1.S1_at, Bt.10880.1.S1_at,
Category	Term	Count	%	PValue	Genes	Bonferroni	Benjamini	FDR
SP_PIR_KEYWORDS	membrane-associated complex	10	0.0115	0.0371316	Bt.265.1.S1_at, Bt.442.1.S1_at, Bt.13170.1.S1_at, Bt.4637.1.A1_a_at, Bt.9826.1.S1_at, Bt.2541.1.S1_at, Bt.77.1.S1_at, Bt.4540.1.S1_at, Bt.75.1.S1_at, Bt.7194.1.S1_at,	1	0.643011	43.6932
SP_PIR_KEYWORDS	oxidative phosphorylation	10	0.0115	0.0481558	Bt.265.1.S1_at, Bt.442.1.S1_at, Bt.4637.1.A1_a_at, Bt.9826.1.S1_at, Bt.2541.1.S1_at, Bt.77.1.S1_at, Bt.404.1.S1_at, Bt.4540.1.S1_at, Bt.75.1.S1_at, Bt.7194.1.S1_at,	1	0.689684	52.7231
SP_PIR_KEYWORDS	mitochondrial inner membrane	5	0.0057	0.141934	Bt.13170.1.S1_at, Bt.4637.1.A1_a_at, Bt.9826.1.S1_at, Bt.77.1.S1_at, Bt.75.1.S1_at,	1	0.880306	90.2072
GOTERM_MF_ALL	GO:0015002~heme-copper terminal oxidase activity	5	0.0057	0.14217	Bt.4637.1.A1_a_at, Bt.9826.1.S1_at, Bt.77.1.S1_at, Bt.75.1.S1_at, Bt.4970.1.S1_at,	1	0.964478	92.6654
GOTERM_MF_ALL	GO:0004129~cytochrome-c oxidase activity	5	0.0057	0.14217	Bt.4637.1.A1_a_at, Bt.9826.1.S1_at, Bt.77.1.S1_at, Bt.75.1.S1_at, Bt.4970.1.S1_at,	1	0.964478	92.6654
GOTERM_MF_ALL	GO:0016676~oxidoreductase activity, acting on heme group of donors, oxygen as acceptor	5	0.0057	0.14217	Bt.4637.1.A1_a_at, Bt.9826.1.S1_at, Bt.77.1.S1_at, Bt.75.1.S1_at, Bt.4970.1.S1_at,	1	0.964478	92.6654
GOTERM_MF_ALL	GO:0016675~oxidoreductase activity, acting on heme group of donors	5	0.0057	0.14217	Bt.4637.1.A1_a_at, Bt.9826.1.S1_at, Bt.77.1.S1_at, Bt.75.1.S1_at, Bt.4970.1.S1_at,	1	0.964478	92.6654
SP_PIR_KEYWORDS	electron transfer	6	0.0069	0.160289	Bt.265.1.S1_at, Bt.4637.1.A1_a_at, Bt.9826.1.S1_at, Bt.5134.1.S1_at, Bt.4434.1.A1_at, Bt.77.1.S1_at, Bt.75.1.S1_at,	1	0.890719	92.9472
SP_PIR_KEYWORDS	inner membrane	8	0.0092	0.258052	Bt.265.1.S1_at, Bt.4637.1.A1_a_at, Bt.9826.1.S1_at, Bt.77.1.S1_at, Bt.1280.2.S1_a_at, Bt.11714.1.S1_at, Bt.4970.1.S1_at, Bt.10880.1.S1_at,	1	0.950471	98.9226
SP_PIR_KEYWORDS	respiratory chain	5	0.0057	0.62191	Bt.265.1.S1_at, Bt.4637.1.A1_a_at, Bt.9826.1.S1_at, Bt.77.1.S1_at, Bt.75.1.S1_at,	1	0.998404	100
Functional Group 44	Median: 0.2426622042147084	Geo: 0.1429670450904359	Bt.5609.3.A1_a_at, Bt.5609.1.A1_a_at, Bt.4116.1.S1_at, Bt.5037.1.S2_at, Bt.21537.1.A1_at, Bt.5150.1.S1_at, Bt.4314.1.S1_at, Bt.5970.1.S1_a_at, Bt.18325.1.A1_at, Bt.18325.2.A1_a_at, Bt.4775.1.S1_at, Bt.12896.1.S1_at, Bt.212.1.S1_at, Bt.247.1.S1_at, Bt.247.1.S2_at, Bt.4107.1.S1_at, Bt.21035.2.S1_at, Bt.21035.1.S1_at, Bt.21342.1.S1_at, Bt.9643.1.S1_at, Bt.5173.1.A1_at, Bt.28500.1.S1_at, Bt.21415.1.S…
Category	Term	Count	%	PValue	Genes	Bonferroni	Benjamini	FDR
SP_PIR_KEYWORDS	calcium binding	12	0.0137	0.00482091	Bt.5609.3.A1_a_at, Bt.5609.1.A1_a_at, Bt.4116.1.S1_at, Bt.5037.1.S2_at, Bt.21537.1.A1_at, Bt.5150.1.S1_at, Bt.4314.1.S1_at, Bt.5970.1.S1_a_at, Bt.18325.1.A1_at, Bt.18325.2.A1_a_at, Bt.4775.1.S1_at, Bt.12896.1.S1_at, Bt.212.1.S1_at, Bt.247.1.S1_at, Bt.247.1.S2_at, Bt.4107.1.S1_at,	0.971331	0.239079	7.07281
INTERPRO	IPR001751:S100/CaBP-9k-type, calcium binding	6	0.0069	0.0183631	Bt.5609.3.A1_a_at, Bt.5609.1.A1_a_at, Bt.5037.1.S2_at, Bt.21537.1.A1_at, Bt.5970.1.S1_a_at, Bt.4775.1.S1_at, Bt.21035.2.S1_at, Bt.21035.1.S1_at, Bt.21342.1.S1_at, Bt.212.1.S1_at,	1	1	28.6852
INTERPRO	IPR013787:S100/CaBP-9k-type, calcium binding, subdomain	5	0.0057	0.0457289	Bt.5609.3.A1_a_at, Bt.5609.1.A1_a_at, Bt.5037.1.S2_at, Bt.21537.1.A1_at, Bt.5970.1.S1_a_at, Bt.4775.1.S1_at, Bt.21035.2.S1_at, Bt.21035.1.S1_at, Bt.21342.1.S1_at,	1	1	57.4203
SP_PIR_KEYWORDS	EF hand	6	0.0069	0.0810211	Bt.5609.3.A1_a_at, Bt.5609.1.A1_a_at, Bt.5037.1.S2_at, Bt.21537.1.A1_at, Bt.5970.1.S1_a_at, Bt.4775.1.S1_at, Bt.12896.1.S1_at, Bt.212.1.S1_at,	1	0.796553	72.2661
SMART	SM00054:EFh	10	0.0115	0.143574	Bt.9643.1.S1_at, Bt.5609.3.A1_a_at, Bt.5609.1.A1_a_at, Bt.5037.1.S2_at, Bt.21537.1.A1_at, Bt.5173.1.A1_at, Bt.5970.1.S1_a_at, Bt.28500.1.S1_at, Bt.21415.1.S1_at, Bt.4775.1.S1_at, Bt.12896.1.S1_at, Bt.21035.2.S1_at, Bt.21035.1.S1_at, Bt.21342.1.S1_at, Bt.212.1.S1_at,	1	0.999983	89.2403
INTERPRO	IPR011992:EF-Hand type	11	0.0126	0.194261	Bt.9643.1.S1_at, Bt.5609.3.A1_a_at, Bt.5609.1.A1_a_at, Bt.5037.1.S2_at, Bt.21537.1.A1_at, Bt.5173.1.A1_at, Bt.5970.1.S1_a_at, Bt.28500.1.S1_at, Bt.21415.1.S1_at, Bt.4775.1.S1_at, Bt.12896.1.S1_at, Bt.21035.2.S1_at, Bt.21035.1.S1_at, Bt.21342.1.S1_at, Bt.212.1.S1_at, Bt.4641.1.S1_at,	1	1	98.0549
PIR_SUPERFAMILY	PIRSF002353:S-100 protein	4	0.0046	0.210608	Bt.5609.3.A1_a_at, Bt.5609.1.A1_a_at, Bt.5037.1.S2_at, Bt.21537.1.A1_at, Bt.5970.1.S1_a_at, Bt.4775.1.S1_at,	1	1	97.9887
UP_SEQ_FEATURE	domain:EF-hand 2	6	0.0069	0.274716	Bt.5609.3.A1_a_at, Bt.5609.1.A1_a_at, Bt.5970.1.S1_a_at, Bt.28500.1.S1_at, Bt.21415.1.S1_at, Bt.4775.1.S1_at, Bt.12896.1.S1_at, Bt.212.1.S1_at,	1	1	99.7209
UP_SEQ_FEATURE	domain:EF-hand 1	6	0.0069	0.274716	Bt.5609.3.A1_a_at, Bt.5609.1.A1_a_at, Bt.5970.1.S1_a_at, Bt.28500.1.S1_at, Bt.21415.1.S1_at, Bt.4775.1.S1_at, Bt.12896.1.S1_at, Bt.212.1.S1_at,	1	1	99.7209
UP_SEQ_FEATURE	calcium-binding region:1; low affinity	3	0.0034	0.333763	Bt.5609.3.A1_a_at, Bt.5609.1.A1_a_at, Bt.5970.1.S1_a_at, Bt.4775.1.S1_at,	1	1	99.941
UP_SEQ_FEATURE	calcium-binding region:2; high affinity	3	0.0034	0.378876	Bt.5609.3.A1_a_at, Bt.5609.1.A1_a_at, Bt.5970.1.S1_a_at, Bt.4775.1.S1_at,	1	1	99.9837
INTERPRO	IPR002048:Calcium-binding EF-hand	10	0.0115	0.39214	Bt.9643.1.S1_at, Bt.5609.3.A1_a_at, Bt.5609.1.A1_a_at, Bt.5037.1.S2_at, Bt.21537.1.A1_at, Bt.5173.1.A1_at, Bt.5970.1.S1_a_at, Bt.28500.1.S1_at, Bt.21415.1.S1_at, Bt.4775.1.S1_at, Bt.12896.1.S1_at, Bt.21035.2.S1_at, Bt.21035.1.S1_at, Bt.21342.1.S1_at, Bt.212.1.S1_at,	1	1	99.9886
SP_PIR_KEYWORDS	calcium	22	0.0252	0.410187	Bt.5609.3.A1_a_at, Bt.5609.1.A1_a_at, Bt.4116.1.S1_at, Bt.9026.1.S1_at, Bt.5150.1.S1_at, Bt.4314.1.S1_at, Bt.4775.1.S1_at, Bt.2582.1.S1_at, Bt.28224.1.A1_at, Bt.12761.1.A1_at, Bt.2498.2.A1_a_at, Bt.23205.1.S1_s_at, Bt.4107.1.S1_at, Bt.11241.1.S1_at, Bt.13021.1.S1_at, Bt.9643.1.S1_at, Bt.5478.1.S1_at, Bt.5173.1.A1_at, Bt.5970.1.S1_a_at, Bt.12896.1.S1_at, Bt.23589.3.A1_a_at, Bt.7343.1.A1_at, Bt.121…	1	0.98784	99.9669
GOTERM_MF_ALL	GO:0005509~calcium ion binding	32	0.0367	0.503939	Bt.5609.3.A1_a_at, Bt.5609.1.A1_a_at, Bt.4116.1.S1_at, Bt.4314.1.S1_at, Bt.18325.1.A1_at, Bt.18325.2.A1_a_at, Bt.2582.1.S1_at, Bt.28224.1.A1_at, Bt.12761.1.A1_at, Bt.11241.1.S1_at, Bt.13021.1.S1_at, Bt.9643.1.S1_at, Bt.5173.1.A1_at, Bt.12896.1.S1_at, Bt.19517.1.S1_at, Bt.21035.2.S1_at, Bt.21035.1.S1_at, Bt.21342.1.S1_at, Bt.16441.1.A1_at, Bt.9026.1.S1_at, Bt.5150.1.S1_at, Bt.28500.1.S1_at, Bt.214…	1	0.999963	99.9993
Functional Group 45	Median: 0.15390518096455613	Geo: 0.1432874621237262	Bt.800.1.S1_at, Bt.1.1.S1_at, Bt.28515.1.A1_at, Bt.29857.1.A1_at, Bt.29857.1.S1_at, Bt.2.1.S1_at, Bt.4532.2.S1_at, Bt.21444.1.S1_at, Bt.4790.1.S1_at, Bt.8482.1.A1_at, Bt.19650.1.A1_at, Bt.9023.1.S1_at, Bt.4322.1.A1_at, Bt.8706.1.S1_at, Bt.272.1.S1_at, Bt.5029.1.S1_at, Bt.3998.1.S1_at, Bt.442.1.S1_at, Bt.7194.1.S1_at, Bt.12365.1.S1_at, Bt.22359.3.S1_at, Bt.13859.1.S1_at, Bt.8047.1.S1_at, Bt.404.1.…
Category	Term	Count	%	PValue	Genes	Bonferroni	Benjamini	FDR
PIR_SUPERFAMILY	PIRSF000564:kinase-related transforming protein	6	0.0069	0.0148752	Bt.800.1.S1_at, Bt.1.1.S1_at, Bt.28515.1.A1_at, Bt.29857.1.A1_at, Bt.29857.1.S1_at, Bt.2.1.S1_at, Bt.4532.2.S1_at, Bt.21444.1.S1_at,	1	1	21.9291
SP_PIR_KEYWORDS	Serine/threonine-protein kinase	12	0.0137	0.0270547	Bt.4790.1.S1_at, Bt.8482.1.A1_at, Bt.19650.1.A1_at, Bt.9023.1.S1_at, Bt.4322.1.A1_at, Bt.1.1.S1_at, Bt.28515.1.A1_at, Bt.29857.1.A1_at, Bt.29857.1.S1_at, Bt.8706.1.S1_at, Bt.2.1.S1_at, Bt.4532.2.S1_at, Bt.21444.1.S1_at, Bt.272.1.S1_at,	1	0.600014	34.0533
INTERPRO	IPR008271:Serine/threonine protein kinase, active site	12	0.0137	0.0426468	Bt.4790.1.S1_at, Bt.8482.1.A1_at, Bt.19650.1.A1_at, Bt.9023.1.S1_at, Bt.4322.1.A1_at, Bt.1.1.S1_at, Bt.28515.1.A1_at, Bt.29857.1.A1_at, Bt.29857.1.S1_at, Bt.8706.1.S1_at, Bt.2.1.S1_at, Bt.4532.2.S1_at, Bt.21444.1.S1_at, Bt.272.1.S1_at,	1	1	54.8407
GOTERM_BP_ALL	GO:0016310~phosphorylation	38	0.0435	0.0493595	Bt.5029.1.S1_at, Bt.3998.1.S1_at, Bt.442.1.S1_at, Bt.9023.1.S1_at, Bt.1.1.S1_at, Bt.7194.1.S1_at, Bt.12365.1.S1_at, Bt.22359.3.S1_at, Bt.4322.1.A1_at, Bt.13859.1.S1_at, Bt.8047.1.S1_at, Bt.404.1.S1_at, Bt.4540.1.S1_at, Bt.28515.1.A1_at, Bt.29857.1.A1_at, Bt.29857.1.S1_at, Bt.8706.1.S1_at, Bt.24899.1.A1_at, Bt.2816.1.S2_at, Bt.14218.1.S1_at, Bt.7236.1.S1_at, Bt.19650.1.A1_at, Bt.4790.1.S1_at, Bt.8…	1	0.702601	60.231
GOTERM_BP_ALL	GO:0006793~phosphorus metabolic process	44	0.0504	0.0624426	Bt.5029.1.S1_at, Bt.3998.1.S1_at, Bt.442.1.S1_at, Bt.9023.1.S1_at, Bt.4153.2.S1_a_at, Bt.1.1.S1_at, Bt.7194.1.S1_at, Bt.22359.3.S1_at, Bt.12365.1.S1_at, Bt.4322.1.A1_at, Bt.13859.1.S1_at, Bt.8047.1.S1_at, Bt.404.1.S1_at, Bt.4540.1.S1_at, Bt.28515.1.A1_at, Bt.29857.1.A1_at, Bt.29857.1.S1_at, Bt.8706.1.S1_at, Bt.24899.1.A1_at, Bt.5590.1.S1_at, Bt.10880.1.S1_at, Bt.2816.1.S2_at, Bt.14218.1.S1_at, Bt…	1	0.758749	69.1032
GOTERM_BP_ALL	GO:0006796~phosphate metabolic process	44	0.0504	0.0624426	Bt.5029.1.S1_at, Bt.3998.1.S1_at, Bt.442.1.S1_at, Bt.9023.1.S1_at, Bt.4153.2.S1_a_at, Bt.1.1.S1_at, Bt.7194.1.S1_at, Bt.22359.3.S1_at, Bt.12365.1.S1_at, Bt.4322.1.A1_at, Bt.13859.1.S1_at, Bt.8047.1.S1_at, Bt.404.1.S1_at, Bt.4540.1.S1_at, Bt.28515.1.A1_at, Bt.29857.1.A1_at, Bt.29857.1.S1_at, Bt.8706.1.S1_at, Bt.24899.1.A1_at, Bt.5590.1.S1_at, Bt.10880.1.S1_at, Bt.2816.1.S2_at, Bt.14218.1.S1_at, Bt…	1	0.758749	69.1032
GOTERM_MF_ALL	GO:0016740~transferase activity	75	0.0859	0.068545	Bt.869.1.S1_at, Bt.11188.1.S1_at, Bt.2404.1.S1_at, Bt.20263.1.S1_at, Bt.1.1.S1_at, Bt.7594.1.S1_at, Bt.26836.2.A1_at, Bt.22359.3.S1_at, Bt.7151.1.S1_at, Bt.9168.1.A1_at, Bt.4322.1.A1_at, Bt.4104.1.S1_at, Bt.13859.1.S1_at, Bt.7641.2.S1_a_at, Bt.7641.1.S1_at, Bt.28515.1.A1_at, Bt.29857.1.A1_at, Bt.29857.1.S1_at, Bt.4476.1.S1_at, Bt.8706.1.S1_at, Bt.6289.1.S1_at, Bt.19676.2.S1_a_at, Bt.3277.1.S1_at,…	1	0.883923	70.1722
UP_SEQ_FEATURE	nucleotide phosphate-binding region:ATP	11	0.0126	0.114273	Bt.27347.1.A1_at, Bt.946.1.S1_at, Bt.8482.1.A1_at, Bt.1.1.S1_at, Bt.28515.1.A1_at, Bt.29857.1.A1_at, Bt.29857.1.S1_at, Bt.8706.1.S1_at, Bt.2.1.S1_at, Bt.4532.2.S1_at, Bt.7194.1.S1_at, Bt.21444.1.S1_at, Bt.272.1.S1_at,	1	1	89.1601
UP_SEQ_FEATURE	domain:Protein kinase	8	0.0092	0.122218	Bt.8482.1.A1_at, Bt.1.1.S1_at, Bt.28515.1.A1_at, Bt.29857.1.A1_at, Bt.29857.1.S1_at, Bt.8706.1.S1_at, Bt.2.1.S1_at, Bt.4532.2.S1_at, Bt.21444.1.S1_at, Bt.272.1.S1_at,	1	1	90.8088
UP_SEQ_FEATURE	binding site:ATP	8	0.0092	0.122218	Bt.8482.1.A1_at, Bt.1.1.S1_at, Bt.28515.1.A1_at, Bt.29857.1.A1_at, Bt.29857.1.S1_at, Bt.8706.1.S1_at, Bt.2.1.S1_at, Bt.4532.2.S1_at, Bt.21444.1.S1_at, Bt.272.1.S1_at,	1	1	90.8088
INTERPRO	IPR002290:Serine/threonine protein kinase	8	0.0092	0.128607	Bt.8482.1.A1_at, Bt.800.1.S1_at, Bt.4322.1.A1_at, Bt.1.1.S1_at, Bt.8706.1.S1_at, Bt.2.1.S1_at, Bt.21444.1.S1_at, Bt.272.1.S1_at,	1	1	91.8816
GOTERM_MF_ALL	GO:0004674~protein serine/threonine kinase activity	18	0.0206	0.150975	Bt.14218.1.S1_at, Bt.19650.1.A1_at, Bt.4790.1.S1_at, Bt.800.1.S1_at, Bt.9023.1.S1_at, Bt.1.1.S1_at, Bt.17934.1.A1_at, Bt.4532.2.S1_at, Bt.2.1.S1_at, Bt.22359.3.S1_at, Bt.8482.1.A1_at, Bt.4322.1.A1_at, Bt.13859.1.S1_at, Bt.28515.1.A1_at, Bt.29857.1.A1_at, Bt.29857.1.S1_at, Bt.8706.1.S1_at, Bt.24899.1.A1_at, Bt.21444.1.S1_at, Bt.272.1.S1_at,	1	0.969201	93.8477
UP_SEQ_FEATURE	active site:Proton acceptor	12	0.0137	0.156835	Bt.5218.1.S1_at, Bt.5231.1.S1_at, Bt.8482.1.A1_at, Bt.1302.1.S1_at, Bt.1.1.S1_at, Bt.28515.1.A1_at, Bt.29857.1.A1_at, Bt.29857.1.S1_at, Bt.8706.1.S1_at, Bt.2.1.S1_at, Bt.4532.2.S1_at, Bt.4599.1.S1_at, Bt.21444.1.S1_at, Bt.272.1.S1_at,	1	1	95.6004
GOTERM_BP_ALL	GO:0043687~post-translational protein modification	50	0.0573	0.192796	Bt.10146.1.S1_at, Bt.10146.2.S1_at, Bt.1.1.S1_at, Bt.20602.1.S1_at, Bt.16132.2.S1_a_at, Bt.22359.3.S1_at, Bt.910.1.S1_at, Bt.4322.1.A1_at, Bt.5397.1.S1_at, Bt.13859.1.S1_at, Bt.8706.1.S1_at, Bt.28515.1.A1_at, Bt.29857.1.A1_at, Bt.29857.1.S1_at, Bt.10880.1.S1_at, Bt.5590.1.S1_at, Bt.7236.1.S1_at, Bt.14218.1.S1_at, Bt.19650.1.A1_at, Bt.29696.1.A1_at, Bt.29696.1.S1_at, Bt.21540.1.S1_at, Bt.26339.1.A…	1	0.960333	97.9788
GOTERM_BP_ALL	GO:0006464~protein modification process	57	0.0653	0.227968	Bt.869.1.S1_at, Bt.10146.1.S1_at, Bt.10146.2.S1_at, Bt.1.1.S1_at, Bt.20602.1.S1_at, Bt.16132.2.S1_a_at, Bt.22359.3.S1_at, Bt.910.1.S1_at, Bt.4322.1.A1_at, Bt.5397.1.S1_at, Bt.13859.1.S1_at, Bt.3080.1.S1_a_at, Bt.28515.1.A1_at, Bt.29857.1.A1_at, Bt.29857.1.S1_at, Bt.8706.1.S1_at, Bt.10880.1.S1_at, Bt.5590.1.S1_at, Bt.14218.1.S1_at, Bt.7236.1.S1_at, Bt.19650.1.A1_at, Bt.29696.1.A1_at, Bt.29696.1.S1…	1	0.97522	99.1022
GOTERM_MF_ALL	GO:0016772~transferase activity, transferring phosphorus-containing groups	40	0.0458	0.234557	Bt.12273.1.S1_at, Bt.8496.1.S1_at, Bt.9023.1.S1_at, Bt.2404.1.S1_at, Bt.10831.1.S1_at, Bt.1.1.S1_at, Bt.5711.1.S1_at, Bt.12365.1.S1_at, Bt.22359.3.S1_at, Bt.4322.1.A1_at, Bt.13859.1.S1_at, Bt.7641.2.S1_a_at, Bt.7641.1.S1_at, Bt.28515.1.A1_at, Bt.29857.1.A1_at, Bt.29857.1.S1_at, Bt.8706.1.S1_at, Bt.24899.1.A1_at, Bt.3277.1.S1_at, Bt.14218.1.S1_at, Bt.26736.2.S1_at, Bt.26736.1.A1_at, Bt.19650.1.A1_…	1	0.993565	98.9474
GOTERM_BP_ALL	GO:0043412~biopolymer modification	59	0.0676	0.252906	Bt.869.1.S1_at, Bt.10146.1.S1_at, Bt.10146.2.S1_at, Bt.1.1.S1_at, Bt.20602.1.S1_at, Bt.16132.2.S1_a_at, Bt.22359.3.S1_at, Bt.910.1.S1_at, Bt.4322.1.A1_at, Bt.5397.1.S1_at, Bt.13859.1.S1_at, Bt.3080.1.S1_a_at, Bt.28515.1.A1_at, Bt.29857.1.A1_at, Bt.29857.1.S1_at, Bt.8706.1.S1_at, Bt.19676.2.S1_a_at, Bt.10880.1.S1_at, Bt.5590.1.S1_at, Bt.14218.1.S1_at, Bt.7236.1.S1_at, Bt.19650.1.A1_at, Bt.29696.1.…	1	0.980992	99.5064
INTERPRO	IPR000719:Protein kinase, core	14	0.016	0.262417	Bt.19650.1.A1_at, Bt.4790.1.S1_at, Bt.800.1.S1_at, Bt.9023.1.S1_at, Bt.29696.1.A1_at, Bt.29696.1.S1_at, Bt.21540.1.S1_at, Bt.1.1.S1_at, Bt.4532.2.S1_at, Bt.2.1.S1_at, Bt.8482.1.A1_at, Bt.4322.1.A1_at, Bt.8706.1.S1_at, Bt.28515.1.A1_at, Bt.29857.1.A1_at, Bt.29857.1.S1_at, Bt.21444.1.S1_at, Bt.272.1.S1_at,	1	1	99.612
GOTERM_MF_ALL	GO:0016301~kinase activity	34	0.0389	0.267867	Bt.9023.1.S1_at, Bt.2404.1.S1_at, Bt.10831.1.S1_at, Bt.1.1.S1_at, Bt.12365.1.S1_at, Bt.22359.3.S1_at, Bt.4322.1.A1_at, Bt.13859.1.S1_at, Bt.7641.2.S1_a_at, Bt.7641.1.S1_at, Bt.28515.1.A1_at, Bt.29857.1.A1_at, Bt.29857.1.S1_at, Bt.8706.1.S1_at, Bt.24899.1.A1_at, Bt.3277.1.S1_at, Bt.14218.1.S1_at, Bt.4790.1.S1_at, Bt.19650.1.A1_at, Bt.26736.2.S1_at, Bt.26736.1.A1_at, Bt.800.1.S1_at, Bt.9155.2.A1_at…	1	0.9965	99.5068
SP_PIR_KEYWORDS	kinase	19	0.0218	0.35549	Bt.19650.1.A1_at, Bt.4790.1.S1_at, Bt.800.1.S1_at, Bt.9023.1.S1_at, Bt.10831.1.S1_at, Bt.1.1.S1_at, Bt.4532.2.S1_at, Bt.2.1.S1_at, Bt.946.1.S1_at, Bt.8482.1.A1_at, Bt.2981.1.S1_at, Bt.4322.1.A1_at, Bt.9599.1.A1_at, Bt.28515.1.A1_at, Bt.29857.1.A1_at, Bt.29857.1.S1_at, Bt.8706.1.S1_at, Bt.21444.1.S1_at, Bt.29954.1.S1_at, Bt.272.1.S1_at, Bt.11739.2.A1_a_at, Bt.11739.1.S1_a_at,	1	0.9805	99.8729
GOTERM_BP_ALL	GO:0006468~protein amino acid phosphorylation	26	0.0298	0.363675	Bt.9023.1.S1_at, Bt.1.1.S1_at, Bt.12365.1.S1_at, Bt.22359.3.S1_at, Bt.4322.1.A1_at, Bt.13859.1.S1_at, Bt.8706.1.S1_at, Bt.28515.1.A1_at, Bt.29857.1.A1_at, Bt.29857.1.S1_at, Bt.24899.1.A1_at, Bt.7236.1.S1_at, Bt.14218.1.S1_at, Bt.4790.1.S1_at, Bt.19650.1.A1_at, Bt.800.1.S1_at, Bt.9155.2.A1_at, Bt.29696.1.A1_at, Bt.29696.1.S1_at, Bt.21540.1.S1_at, Bt.17934.1.A1_at, Bt.2.1.S1_at, Bt.4532.2.S1_at, Bt…	1	0.995285	99.9735
GOTERM_MF_ALL	GO:0004672~protein kinase activity	22	0.0252	0.479479	Bt.14218.1.S1_at, Bt.19650.1.A1_at, Bt.4790.1.S1_at, Bt.800.1.S1_at, Bt.9155.2.A1_at, Bt.9023.1.S1_at, Bt.29696.1.A1_at, Bt.29696.1.S1_at, Bt.21540.1.S1_at, Bt.17934.1.A1_at, Bt.1.1.S1_at, Bt.4532.2.S1_at, Bt.2.1.S1_at, Bt.12365.1.S1_at, Bt.22359.3.S1_at, Bt.27430.2.S1_at, Bt.8482.1.A1_at, Bt.4322.1.A1_at, Bt.13859.1.S1_at, Bt.28515.1.A1_at, Bt.29857.1.A1_at, Bt.29857.1.S1_at, Bt.8706.1.S1_at, Bt…	1	0.99995	99.9985
GOTERM_MF_ALL	GO:0016773~phosphotransferase activity, alcohol group as acceptor	25	0.0286	0.502182	Bt.9023.1.S1_at, Bt.1.1.S1_at, Bt.22359.3.S1_at, Bt.12365.1.S1_at, Bt.4322.1.A1_at, Bt.13859.1.S1_at, Bt.7641.2.S1_a_at, Bt.7641.1.S1_at, Bt.8706.1.S1_at, Bt.28515.1.A1_at, Bt.29857.1.A1_at, Bt.29857.1.S1_at, Bt.24899.1.A1_at, Bt.14218.1.S1_at, Bt.4790.1.S1_at, Bt.19650.1.A1_at, Bt.26736.2.S1_at, Bt.26736.1.A1_at, Bt.800.1.S1_at, Bt.9155.2.A1_at, Bt.29696.1.A1_at, Bt.29696.1.S1_at, Bt.21540.1.S1_…	1	0.999967	99.9993
SMART	SM00220:S_TKc	11	0.0126	0.835605	Bt.4790.1.S1_at, Bt.8482.1.A1_at, Bt.800.1.S1_at, Bt.653.1.S1_at, Bt.4322.1.A1_at, Bt.13859.1.S1_at, Bt.1.1.S1_at, Bt.8706.1.S1_at, Bt.2.1.S1_at, Bt.21444.1.S1_at, Bt.272.1.S1_at,	1	1	100
Functional Group 46	Median: 0.09799521887868343	Geo: 0.15248780487136251	Bt.3050.1.S1_at, Bt.5141.1.S1_at, Bt.5141.1.S2_at, Bt.21223.2.S1_at, Bt.499.1.S1_a_at, Bt.4641.1.S1_at, Bt.224.1.S1_at, Bt.2573.1.S1_at, Bt.5024.1.S1_at, Bt.22840.1.S1_a_at, Bt.4797.1.S1_at, Bt.15436.2.S1_a_at, Bt.15436.1.S1_s_at, Bt.2712.1.S1_at, Bt.9889.1.S1_at, Bt.28119.1.S1_at, Bt.29698.1.A1_at, Bt.7236.1.S1_at, Bt.4557.1.S1_at, Bt.272.1.S1_at,
Category	Term	Count	%	PValue	Genes	Bonferroni	Benjamini	FDR
GOTERM_BP_ALL	GO:0032504~multicellular organism reproduction	5	0.0057	0.0689141	Bt.3050.1.S1_at, Bt.5141.1.S1_at, Bt.5141.1.S2_at, Bt.21223.2.S1_at, Bt.499.1.S1_a_at, Bt.4641.1.S1_at,	1	0.784335	72.7656
GOTERM_BP_ALL	GO:0048609~reproductive process in a multicellular organism	5	0.0057	0.0689141	Bt.3050.1.S1_at, Bt.5141.1.S1_at, Bt.5141.1.S2_at, Bt.21223.2.S1_at, Bt.499.1.S1_a_at, Bt.4641.1.S1_at,	1	0.784335	72.7656
GOTERM_BP_ALL	GO:0007595~lactation	3	0.0034	0.0785949	Bt.21223.2.S1_at, Bt.499.1.S1_a_at, Bt.4641.1.S1_at,	1	0.804503	77.487
GOTERM_BP_ALL	GO:0022414~reproductive process	10	0.0115	0.0910445	Bt.224.1.S1_at, Bt.2573.1.S1_at, Bt.5024.1.S1_at, Bt.3050.1.S1_at, Bt.5141.1.S1_at, Bt.5141.1.S2_at, Bt.22840.1.S1_a_at, Bt.21223.2.S1_at, Bt.499.1.S1_a_at, Bt.4797.1.S1_at, Bt.4641.1.S1_at,	1	0.842469	82.4283
GOTERM_BP_ALL	GO:0000003~reproduction	14	0.016	0.104946	Bt.5024.1.S1_at, Bt.2573.1.S1_at, Bt.224.1.S1_at, Bt.5141.1.S1_at, Bt.5141.1.S2_at, Bt.15436.2.S1_a_at, Bt.15436.1.S1_s_at, Bt.2712.1.S1_at, Bt.499.1.S1_a_at, Bt.4797.1.S1_at, Bt.3050.1.S1_at, Bt.22840.1.S1_a_at, Bt.21223.2.S1_at, Bt.9889.1.S1_at, Bt.28119.1.S1_at, Bt.4641.1.S1_at,	1	0.871409	86.7295
GOTERM_BP_ALL	GO:0007548~sex differentiation	4	0.0046	0.282638	Bt.3050.1.S1_at, Bt.5141.1.S1_at, Bt.5141.1.S2_at, Bt.4797.1.S1_at, Bt.4641.1.S1_at,	1	0.986935	99.7644
GOTERM_BP_ALL	GO:0003006~reproductive developmental process	4	0.0046	0.301881	Bt.3050.1.S1_at, Bt.5141.1.S1_at, Bt.5141.1.S2_at, Bt.4797.1.S1_at, Bt.4641.1.S1_at,	1	0.989616	99.8564
KEGG_PATHWAY	bta04630:Jak-STAT signaling pathway	7	0.008	0.960695	Bt.29698.1.A1_at, Bt.7236.1.S1_at, Bt.21223.2.S1_at, Bt.4557.1.S1_at, Bt.499.1.S1_a_at, Bt.4641.1.S1_at, Bt.272.1.S1_at,	1	0.999885	100
Functional Group 47	Median: 0.21742780279804416	Geo: 0.16911127307532997	Bt.11189.1.S1_at, Bt.9153.1.S1_at, Bt.13134.1.A1_at, Bt.13134.1.S1_at, Bt.5389.1.S1_at, Bt.4619.1.S1_at, Bt.4834.1.S1_at, Bt.18808.1.S1_at, Bt.5006.1.S1_at, Bt.16068.1.A1_at, Bt.742.1.S2_at, Bt.20455.1.S1_at,
Category	Term	Count	%	PValue	Genes	Bonferroni	Benjamini	FDR
GOTERM_BP_ALL	GO:0031324~negative regulation of cellular metabolic process	9	0.0103	0.0604724	Bt.11189.1.S1_at, Bt.9153.1.S1_at, Bt.13134.1.A1_at, Bt.13134.1.S1_at, Bt.5389.1.S1_at, Bt.4619.1.S1_at, Bt.4834.1.S1_at, Bt.18808.1.S1_at, Bt.5006.1.S1_at, Bt.16068.1.A1_at, Bt.742.1.S2_at,	1	0.749625	67.8988
GOTERM_BP_ALL	GO:0009892~negative regulation of metabolic process	10	0.0115	0.0752621	Bt.11189.1.S1_at, Bt.9153.1.S1_at, Bt.13134.1.A1_at, Bt.13134.1.S1_at, Bt.5389.1.S1_at, Bt.20455.1.S1_at, Bt.4619.1.S1_at, Bt.4834.1.S1_at, Bt.18808.1.S1_at, Bt.5006.1.S1_at, Bt.16068.1.A1_at, Bt.742.1.S2_at,	1	0.801776	75.9566
GOTERM_BP_ALL	GO:0016481~negative regulation of transcription	5	0.0057	0.217428	Bt.4619.1.S1_at, Bt.4834.1.S1_at, Bt.18808.1.S1_at, Bt.16068.1.A1_at, Bt.742.1.S2_at,	1	0.972581	98.8507
GOTERM_BP_ALL	GO:0045934~negative regulation of nucleobase, nucleoside, nucleotide and nucleic acid metabolic process	5	0.0057	0.326177	Bt.4619.1.S1_at, Bt.4834.1.S1_at, Bt.18808.1.S1_at, Bt.16068.1.A1_at, Bt.742.1.S2_at,	1	0.992728	99.9247
GOTERM_BP_ALL	GO:0045892~negative regulation of transcription, DNA-dependent	3	0.0034	0.42851	Bt.4834.1.S1_at, Bt.18808.1.S1_at, Bt.742.1.S2_at,	1	0.998343	99.9963
Functional Group 48	Median: 0.14733113872213446	Geo: 0.17438631654422682	Bt.9731.1.S1_at, Bt.1302.1.S1_at, Bt.23128.2.A1_at, Bt.3080.1.S1_a_at, Bt.16068.1.A1_at, Bt.5534.1.S1_at, Bt.2573.1.S1_at, Bt.12144.2.S1_a_at, Bt.3525.1.S1_at, Bt.9023.1.S1_at, Bt.4314.1.S1_at, Bt.20275.1.S1_at, Bt.4557.1.S1_at, Bt.177.1.S1_at, Bt.6438.1.A1_at, Bt.3050.1.S1_at, Bt.19517.1.S1_at, Bt.7157.1.S1_at, Bt.23268.1.S1_at, Bt.4775.1.S1_at, Bt.2498.2.A1_a_at, Bt.7908.1.S1_at, Bt.4834.1.S1_a…
Category	Term	Count	%	PValue	Genes	Bonferroni	Benjamini	FDR
GOTERM_BP_ALL	GO:0045454~cell redox homeostasis	6	0.0069	0.0976152	Bt.9731.1.S1_at, Bt.1302.1.S1_at, Bt.23128.2.A1_at, Bt.3080.1.S1_a_at, Bt.16068.1.A1_at, Bt.5534.1.S1_at,	1	0.859947	84.6037
GOTERM_BP_ALL	GO:0065008~regulation of biological quality	26	0.0298	0.104375	Bt.2573.1.S1_at, Bt.12144.2.S1_a_at, Bt.3525.1.S1_at, Bt.9023.1.S1_at, Bt.4314.1.S1_at, Bt.20275.1.S1_at, Bt.4557.1.S1_at, Bt.177.1.S1_at, Bt.5534.1.S1_at, Bt.6438.1.A1_at, Bt.3050.1.S1_at, Bt.3080.1.S1_a_at, Bt.19517.1.S1_at, Bt.7157.1.S1_at, Bt.23268.1.S1_at, Bt.1302.1.S1_at, Bt.9731.1.S1_at, Bt.23128.2.A1_at, Bt.4775.1.S1_at, Bt.16068.1.A1_at, Bt.2498.2.A1_a_at, Bt.7908.1.S1_at, Bt.4834.1.S1_a…	1	0.871357	86.5745
GOTERM_BP_ALL	GO:0042592~homeostatic process	15	0.0172	0.190287	Bt.23268.1.S1_at, Bt.3525.1.S1_at, Bt.1302.1.S1_at, Bt.9023.1.S1_at, Bt.9731.1.S1_at, Bt.23128.2.A1_at, Bt.4775.1.S1_at, Bt.16068.1.A1_at, Bt.5534.1.S1_at, Bt.7908.1.S1_at, Bt.4802.1.S1_at, Bt.7780.1.S1_at, Bt.3080.1.S1_a_at, Bt.7157.1.S1_at, Bt.19517.1.S1_at, Bt.4641.1.S1_at,	1	0.95903	97.8613
GOTERM_BP_ALL	GO:0019725~cellular homeostasis	9	0.0103	0.477008	Bt.9731.1.S1_at, Bt.1302.1.S1_at, Bt.23128.2.A1_at, Bt.4775.1.S1_at, Bt.4802.1.S1_at, Bt.7780.1.S1_at, Bt.3080.1.S1_a_at, Bt.16068.1.A1_at, Bt.19517.1.S1_at, Bt.5534.1.S1_at,	1	0.999095	99.9993
Functional Group 49	Median: 0.160635990707364	Geo: 0.1752152052779141	Bt.800.1.S1_at, Bt.1.1.S1_at, Bt.28515.1.A1_at, Bt.29857.1.A1_at, Bt.29857.1.S1_at, Bt.2.1.S1_at, Bt.4532.2.S1_at, Bt.21444.1.S1_at, Bt.14644.1.A1_at, Bt.8191.1.S1_at, Bt.7236.1.S1_at, Bt.946.1.S1_at, Bt.9153.1.S1_at, Bt.13134.1.A1_at, Bt.13134.1.S1_at, Bt.13220.1.S1_at, Bt.6440.1.S1_at, Bt.212.1.S1_at,
Category	Term	Count	%	PValue	Genes	Bonferroni	Benjamini	FDR
PIR_SUPERFAMILY	PIRSF000564:kinase-related transforming protein	6	0.0069	0.0148752	Bt.800.1.S1_at, Bt.1.1.S1_at, Bt.28515.1.A1_at, Bt.29857.1.A1_at, Bt.29857.1.S1_at, Bt.2.1.S1_at, Bt.4532.2.S1_at, Bt.21444.1.S1_at,	1	1	21.9291
SP_PIR_KEYWORDS	Wnt signaling pathway	4	0.0046	0.132265	Bt.1.1.S1_at, Bt.28515.1.A1_at, Bt.29857.1.A1_at, Bt.29857.1.S1_at, Bt.4532.2.S1_at, Bt.14644.1.A1_at,	1	0.870566	88.3917
GOTERM_BP_ALL	GO:0016055~Wnt receptor signaling pathway	5	0.0057	0.160636	Bt.8191.1.S1_at, Bt.1.1.S1_at, Bt.28515.1.A1_at, Bt.29857.1.A1_at, Bt.29857.1.S1_at, Bt.4532.2.S1_at, Bt.14644.1.A1_at,	1	0.940215	95.8821
SP_PIR_KEYWORDS	phosphotransferase	5	0.0057	0.578999	Bt.7236.1.S1_at, Bt.946.1.S1_at, Bt.1.1.S1_at, Bt.28515.1.A1_at, Bt.29857.1.A1_at, Bt.29857.1.S1_at, Bt.4532.2.S1_at,	1	0.997226	99.9998
KEGG_PATHWAY	bta04310:Wnt signaling pathway	7	0.008	0.902461	Bt.9153.1.S1_at, Bt.13134.1.A1_at, Bt.13134.1.S1_at, Bt.13220.1.S1_at, Bt.6440.1.S1_at, Bt.1.1.S1_at, Bt.4532.2.S1_at, Bt.14644.1.A1_at, Bt.212.1.S1_at,	1	0.999323	100
Functional Group 50	Median: 0.32832816837165435	Geo: 0.17747320974570102	Bt.29462.1.S1_at, Bt.4138.1.S1_a_at, Bt.3137.1.S1_at, Bt.2.1.S1_at, Bt.11171.1.S1_at, Bt.15668.1.S1_at, Bt.236.1.S1_at, Bt.21766.2.S1_at, Bt.4834.1.S1_at, Bt.20877.1.S1_at, Bt.28037.1.S1_at, Bt.20128.1.A1_at, Bt.2353.1.S1_at, Bt.9603.1.A1_at, Bt.9603.2.S1_at, Bt.21444.1.S1_at, Bt.4641.1.S1_at, Bt.24529.2.A1_at,
Category	Term	Count	%	PValue	Genes	Bonferroni	Benjamini	FDR
GOTERM_BP_ALL	GO:0022402~cell cycle process	17	0.0195	0.051854	Bt.29462.1.S1_at, Bt.4138.1.S1_a_at, Bt.3137.1.S1_at, Bt.2.1.S1_at, Bt.11171.1.S1_at, Bt.15668.1.S1_at, Bt.236.1.S1_at, Bt.21766.2.S1_at, Bt.4834.1.S1_at, Bt.20877.1.S1_at, Bt.28037.1.S1_at, Bt.20128.1.A1_at, Bt.2353.1.S1_at, Bt.9603.1.A1_at, Bt.9603.2.S1_at, Bt.21444.1.S1_at, Bt.4641.1.S1_at, Bt.24529.2.A1_at,	1	0.708096	62.0895
GOTERM_BP_ALL	GO:0051726~regulation of cell cycle	9	0.0103	0.328328	Bt.21766.2.S1_at, Bt.236.1.S1_at, Bt.4834.1.S1_at, Bt.4138.1.S1_a_at, Bt.2353.1.S1_at, Bt.2.1.S1_at, Bt.11171.1.S1_at, Bt.9603.1.A1_at, Bt.9603.2.S1_at, Bt.4641.1.S1_at,	1	0.992616	99.929
GOTERM_BP_ALL	GO:0000074~regulation of progression through cell cycle	9	0.0103	0.328328	Bt.21766.2.S1_at, Bt.236.1.S1_at, Bt.4834.1.S1_at, Bt.4138.1.S1_a_at, Bt.2353.1.S1_at, Bt.2.1.S1_at, Bt.11171.1.S1_at, Bt.9603.1.A1_at, Bt.9603.2.S1_at, Bt.4641.1.S1_at,	1	0.992616	99.929
Functional Group 51	Median: 0.1843322251469808	Geo: 0.18918143850765778	Bt.3050.1.S1_at, Bt.6438.1.A1_at, Bt.4834.1.S1_at, Bt.18808.1.S1_at, Bt.4775.1.S1_at, Bt.8131.1.S1_at, Bt.5517.1.S2_at, Bt.1747.1.S1_at, Bt.983.1.S1_at, Bt.58.1.S1_at, Bt.2573.1.S1_at, Bt.21745.1.S1_at, Bt.23205.1.S1_s_at, Bt.26992.1.A1_at, Bt.12144.2.S1_a_at, Bt.8624.1.S1_at, Bt.8924.1.S1_at, Bt.16068.1.A1_at,
Category	Term	Count	%	PValue	Genes	Bonferroni	Benjamini	FDR
GOTERM_BP_ALL	GO:0022008~neurogenesis	9	0.0103	0.01956	Bt.3050.1.S1_at, Bt.6438.1.A1_at, Bt.4834.1.S1_at, Bt.18808.1.S1_at, Bt.4775.1.S1_at, Bt.8131.1.S1_at, Bt.5517.1.S2_at, Bt.1747.1.S1_at, Bt.983.1.S1_at,	1	0.492443	30.2208
GOTERM_BP_ALL	GO:0007417~central nervous system development	6	0.0069	0.051407	Bt.3050.1.S1_at, Bt.4834.1.S1_at, Bt.58.1.S1_at, Bt.18808.1.S1_at, Bt.4775.1.S1_at, Bt.983.1.S1_at,	1	0.712462	61.7627
GOTERM_BP_ALL	GO:0042063~gliogenesis	3	0.0034	0.100153	Bt.3050.1.S1_at, Bt.4834.1.S1_at, Bt.4775.1.S1_at,	1	0.862675	85.3736
GOTERM_BP_ALL	GO:0010001~glial cell differentiation	3	0.0034	0.100153	Bt.3050.1.S1_at, Bt.4834.1.S1_at, Bt.4775.1.S1_at,	1	0.862675	85.3736
GOTERM_BP_ALL	GO:0019226~transmission of nerve impulse	7	0.008	0.108895	Bt.2573.1.S1_at, Bt.3050.1.S1_at, Bt.21745.1.S1_at, Bt.4834.1.S1_at, Bt.4775.1.S1_at, Bt.23205.1.S1_s_at, Bt.983.1.S1_at,	1	0.877292	87.7564
GOTERM_BP_ALL	GO:0007267~cell-cell signaling	8	0.0092	0.184332	Bt.2573.1.S1_at, Bt.3050.1.S1_at, Bt.21745.1.S1_at, Bt.26992.1.A1_at, Bt.4834.1.S1_at, Bt.4775.1.S1_at, Bt.23205.1.S1_s_at, Bt.983.1.S1_at,	1	0.956766	97.5559
GOTERM_BP_ALL	GO:0007268~synaptic transmission	5	0.0057	0.26305	Bt.21745.1.S1_at, Bt.4834.1.S1_at, Bt.4775.1.S1_at, Bt.23205.1.S1_s_at, Bt.983.1.S1_at,	1	0.983403	99.6152
GOTERM_BP_ALL	GO:0001505~regulation of neurotransmitter levels	3	0.0034	0.475764	Bt.21745.1.S1_at, Bt.23205.1.S1_s_at, Bt.983.1.S1_at,	1	0.999093	99.9992
GOTERM_BP_ALL	GO:0003008~system process	12	0.0137	0.587128	Bt.2573.1.S1_at, Bt.3050.1.S1_at, Bt.21745.1.S1_at, Bt.6438.1.A1_at, Bt.12144.2.S1_a_at, Bt.4834.1.S1_at, Bt.8624.1.S1_at, Bt.4775.1.S1_at, Bt.8924.1.S1_at, Bt.16068.1.A1_at, Bt.23205.1.S1_s_at, Bt.983.1.S1_at,	1	0.999832	100
GOTERM_BP_ALL	GO:0050877~neurological system process	7	0.008	0.847581	Bt.2573.1.S1_at, Bt.3050.1.S1_at, Bt.21745.1.S1_at, Bt.4834.1.S1_at, Bt.4775.1.S1_at, Bt.23205.1.S1_s_at, Bt.983.1.S1_at,	1	1	100
GOTERM_BP_ALL	GO:0007610~behavior	4	0.0046	0.881038	Bt.21745.1.S1_at, Bt.4775.1.S1_at, Bt.5517.1.S2_at, Bt.983.1.S1_at,	1	1	100
Functional Group 52	Median: 0.21520351652629455	Geo: 0.18952758959416088	Bt.4816.1.S1_at, Bt.6438.1.A1_at, Bt.5141.1.S1_at, Bt.5141.1.S2_at, Bt.5449.1.S1_at, Bt.4834.1.S1_at, Bt.234.1.S1_at, Bt.4314.1.S1_at, Bt.4138.1.S1_a_at, Bt.177.1.S1_at, Bt.2573.1.S1_at, Bt.58.1.S1_at, Bt.18808.1.S1_at, Bt.4641.1.S1_at, Bt.1747.1.S1_at, Bt.236.1.S1_at, Bt.2632.1.S1_at, Bt.982.1.S1_at, Bt.982.1.S1_a_at, Bt.2498.2.A1_a_at, Bt.1794.1.S1_a_at, Bt.10236.1.S1_at, Bt.26992.1.A1_at,
Category	Term	Count	%	PValue	Genes	Bonferroni	Benjamini	FDR
GOTERM_BP_ALL	GO:0001568~blood vessel development	9	0.0103	0.0329348	Bt.4816.1.S1_at, Bt.6438.1.A1_at, Bt.5141.1.S1_at, Bt.5141.1.S2_at, Bt.5449.1.S1_at, Bt.4834.1.S1_at, Bt.234.1.S1_at, Bt.4314.1.S1_at, Bt.4138.1.S1_a_at, Bt.177.1.S1_at,	1	0.611352	45.6672
GOTERM_BP_ALL	GO:0001944~vasculature development	9	0.0103	0.0329348	Bt.4816.1.S1_at, Bt.6438.1.A1_at, Bt.5141.1.S1_at, Bt.5141.1.S2_at, Bt.5449.1.S1_at, Bt.4834.1.S1_at, Bt.234.1.S1_at, Bt.4314.1.S1_at, Bt.4138.1.S1_a_at, Bt.177.1.S1_at,	1	0.611352	45.6672
GOTERM_BP_ALL	GO:0048514~blood vessel morphogenesis	8	0.0092	0.0484752	Bt.4816.1.S1_at, Bt.6438.1.A1_at, Bt.5141.1.S1_at, Bt.5141.1.S2_at, Bt.4834.1.S1_at, Bt.234.1.S1_at, Bt.4314.1.S1_at, Bt.4138.1.S1_a_at, Bt.177.1.S1_at,	1	0.701141	59.5517
GOTERM_BP_ALL	GO:0048646~anatomical structure formation	7	0.008	0.0784763	Bt.2573.1.S1_at, Bt.4816.1.S1_at, Bt.5141.1.S1_at, Bt.5141.1.S2_at, Bt.4834.1.S1_at, Bt.234.1.S1_at, Bt.4314.1.S1_at, Bt.4138.1.S1_a_at,	1	0.805915	77.4342
GOTERM_BP_ALL	GO:0008284~positive regulation of cell proliferation	7	0.008	0.0855735	Bt.6438.1.A1_at, Bt.5141.1.S1_at, Bt.5141.1.S2_at, Bt.4834.1.S1_at, Bt.234.1.S1_at, Bt.58.1.S1_at, Bt.18808.1.S1_at, Bt.4641.1.S1_at,	1	0.828419	80.3986
GOTERM_BP_ALL	GO:0009887~organ morphogenesis	10	0.0115	0.0855824	Bt.4816.1.S1_at, Bt.6438.1.A1_at, Bt.5141.1.S1_at, Bt.5141.1.S2_at, Bt.4834.1.S1_at, Bt.234.1.S1_at, Bt.4314.1.S1_at, Bt.18808.1.S1_at, Bt.4138.1.S1_a_at, Bt.177.1.S1_at, Bt.1747.1.S1_at,	1	0.826663	80.4021
GOTERM_BP_ALL	GO:0001525~angiogenesis	6	0.0069	0.116497	Bt.4816.1.S1_at, Bt.5141.1.S1_at, Bt.5141.1.S2_at, Bt.4834.1.S1_at, Bt.234.1.S1_at, Bt.4314.1.S1_at, Bt.4138.1.S1_a_at,	1	0.889821	89.5257
GOTERM_BP_ALL	GO:0007423~sensory organ development	4	0.0046	0.154582	Bt.6438.1.A1_at, Bt.4834.1.S1_at, Bt.18808.1.S1_at, Bt.4138.1.S1_a_at,	1	0.934634	95.3061
GOTERM_BP_ALL	GO:0030198~extracellular matrix organization and biogenesis	3	0.0034	0.275825	Bt.6438.1.A1_at, Bt.5141.1.S1_at, Bt.5141.1.S2_at, Bt.4314.1.S1_at,	1	0.985703	99.7202
GOTERM_BP_ALL	GO:0001654~eye development	3	0.0034	0.275825	Bt.6438.1.A1_at, Bt.4834.1.S1_at, Bt.4138.1.S1_a_at,	1	0.985703	99.7202
GOTERM_BP_ALL	GO:0043062~extracellular structure organization and biogenesis	3	0.0034	0.327999	Bt.6438.1.A1_at, Bt.5141.1.S1_at, Bt.5141.1.S2_at, Bt.4314.1.S1_at,	1	0.992706	99.9283
SP_PIR_KEYWORDS	mitogen	4	0.0046	0.369732	Bt.6438.1.A1_at, Bt.236.1.S1_at, Bt.4834.1.S1_at, Bt.4138.1.S1_a_at,	1	0.983223	99.9094
GOTERM_CC_ALL	GO:0005615~extracellular space	8	0.0092	0.770274	Bt.4816.1.S1_at, Bt.4834.1.S1_at, Bt.2632.1.S1_at, Bt.234.1.S1_at, Bt.4138.1.S1_a_at, Bt.982.1.S1_at, Bt.982.1.S1_a_at, Bt.2498.2.A1_a_at, Bt.1794.1.S1_a_at,	1	0.99672	100
GOTERM_MF_ALL	GO:0008083~growth factor activity	6	0.0069	0.80481	Bt.6438.1.A1_at, Bt.236.1.S1_at, Bt.10236.1.S1_at, Bt.4834.1.S1_at, Bt.234.1.S1_at, Bt.4138.1.S1_a_at,	1	1	100
SP_PIR_KEYWORDS	growth factor	5	0.0057	0.895226	Bt.6438.1.A1_at, Bt.236.1.S1_at, Bt.10236.1.S1_at, Bt.4834.1.S1_at, Bt.4138.1.S1_a_at,	1	0.999994	100
GOTERM_CC_ALL	GO:0044421~extracellular region part	10	0.0115	0.994706	Bt.4816.1.S1_at, Bt.26992.1.A1_at, Bt.4834.1.S1_at, Bt.2632.1.S1_at, Bt.234.1.S1_at, Bt.4314.1.S1_at, Bt.4138.1.S1_a_at, Bt.982.1.S1_at, Bt.982.1.S1_a_at, Bt.2498.2.A1_a_at, Bt.1794.1.S1_a_at,	1	1	100
Functional Group 53	Median: 0.2943931376214139	Geo: 0.20113766295361002	Bt.23179.1.S1_at, Bt.23179.1.S2_at, Bt.5154.1.S1_at, Bt.5154.1.S1_s_at, Bt.571.1.S1_at, Bt.24256.1.S1_at, Bt.24181.1.S1_at, Bt.12309.1.S1_at, Bt.23608.1.S1_s_at, Bt.28009.1.A1_at, Bt.14103.1.A1_at, Bt.23387.1.A1_at, Bt.4273.1.S1_at, Bt.29939.1.S1_at, Bt.29939.2.S1_at, Bt.28699.1.S1_at, Bt.4802.1.S1_at, Bt.7780.1.S1_at, Bt.2763.1.S1_at, Bt.5154.1.S1_at, Bt.5154.1.S1_s_at, Bt.504.1.S1_at, Bt.4797.1…
Category	Term	Count	%	PValue	Genes	Bonferroni	Benjamini	FDR
GOTERM_BP_ALL	GO:0009607~response to biotic stimulus	14	0.016	0.0219164	Bt.23179.1.S1_at, Bt.23179.1.S2_at, Bt.5154.1.S1_at, Bt.5154.1.S1_s_at, Bt.571.1.S1_at, Bt.24256.1.S1_at, Bt.24181.1.S1_at, Bt.12309.1.S1_at, Bt.23608.1.S1_s_at, Bt.28009.1.A1_at, Bt.14103.1.A1_at, Bt.23387.1.A1_at, Bt.4273.1.S1_at, Bt.29939.1.S1_at, Bt.29939.2.S1_at, Bt.28699.1.S1_at, Bt.4802.1.S1_at, Bt.7780.1.S1_at, Bt.2763.1.S1_at, Bt.5154.1.S1_at, Bt.5154.1.S1_s_at, Bt.504.1.S1_at,	1	0.501506	33.2135
GOTERM_BP_ALL	GO:0051704~multi-organism process	9	0.0103	0.247073	Bt.571.1.S1_at, Bt.28699.1.S1_at, Bt.4802.1.S1_at, Bt.7780.1.S1_at, Bt.24256.1.S1_at, Bt.24181.1.S1_at, Bt.2763.1.S1_at, Bt.4797.1.S1_at, Bt.23608.1.S1_s_at, Bt.28009.1.A1_at, Bt.4641.1.S1_at,	1	0.981139	99.4312
GOTERM_BP_ALL	GO:0009617~response to bacterium	5	0.0057	0.294393	Bt.571.1.S1_at, Bt.28699.1.S1_at, Bt.4802.1.S1_at, Bt.7780.1.S1_at, Bt.24181.1.S1_at, Bt.2763.1.S1_at,	1	0.988898	99.8256
GOTERM_BP_ALL	GO:0051707~response to other organism	7	0.008	0.299784	Bt.571.1.S1_at, Bt.28699.1.S1_at, Bt.4802.1.S1_at, Bt.7780.1.S1_at, Bt.24256.1.S1_at, Bt.24181.1.S1_at, Bt.2763.1.S1_at, Bt.23608.1.S1_s_at, Bt.28009.1.A1_at,	1	0.989398	99.8484
GOTERM_BP_ALL	GO:0042742~defense response to bacterium	3	0.0034	0.688866	Bt.571.1.S1_at, Bt.4802.1.S1_at, Bt.7780.1.S1_at, Bt.24181.1.S1_at,	1	0.999976	100
Functional Group 54	Median: 0.1421700307624143	Geo: 0.2077248336799785	Bt.5449.1.S1_at, Bt.22854.2.S1_at, Bt.14010.1.S1_at, Bt.13170.1.S1_at, Bt.5033.1.S1_at, Bt.13324.4.S1_at, Bt.13324.1.S1_a_at, Bt.20141.1.S1_at, Bt.621.1.S1_at,
Category	Term	Count	%	PValue	Genes	Bonferroni	Benjamini	FDR
GOTERM_MF_ALL	GO:0016628~oxidoreductase activity, acting on the CH-CH group of donors, NAD or NADP as acceptor	3	0.0034	0.107618	Bt.5449.1.S1_at, Bt.22854.2.S1_at, Bt.14010.1.S1_at,	1	0.944174	85.6268
GOTERM_MF_ALL	GO:0016627~oxidoreductase activity, acting on the CH-CH group of donors	5	0.0057	0.14217	Bt.13170.1.S1_at, Bt.5449.1.S1_at, Bt.5033.1.S1_at, Bt.22854.2.S1_at, Bt.14010.1.S1_at,	1	0.964478	92.6654
SP_PIR_KEYWORDS	nadp	6	0.0069	0.585833	Bt.5449.1.S1_at, Bt.13324.4.S1_at, Bt.13324.1.S1_a_at, Bt.20141.1.S1_at, Bt.22854.2.S1_at, Bt.621.1.S1_at, Bt.14010.1.S1_at,	1	0.997378	99.9998
Functional Group 55	Median: 0.12396467579498698	Geo: 0.2092695550358286	Bt.3573.1.S2_at, Bt.3573.1.S1_at, Bt.27901.1.S1_at, Bt.21708.1.S1_at, Bt.6819.1.S1_at, Bt.15534.1.S1_a_at, Bt.461.1.S1_at, Bt.24676.2.A1_at, Bt.19522.1.S1_at, Bt.7323.1.S1_at, Bt.20141.1.S1_at, Bt.4691.1.S1_at, Bt.4797.1.S1_at, Bt.927.1.S1_at, Bt.3050.1.S1_at, Bt.4917.1.S1_at, Bt.9182.1.S1_at, Bt.28064.2.S1_at, Bt.9929.1.A1_at, Bt.2898.3.S1_at, Bt.14150.1.S1_at, Bt.20852.1.A1_at, Bt.2711.1.S1_at,…
Category	Term	Count	%	PValue	Genes	Bonferroni	Benjamini	FDR
GOTERM_MF_ALL	GO:0005525~GTP binding	21	0.0241	0.0789315	Bt.3573.1.S2_at, Bt.3573.1.S1_at, Bt.27901.1.S1_at, Bt.21708.1.S1_at, Bt.6819.1.S1_at, Bt.15534.1.S1_a_at, Bt.461.1.S1_at, Bt.24676.2.A1_at, Bt.19522.1.S1_at, Bt.7323.1.S1_at, Bt.20141.1.S1_at, Bt.4691.1.S1_at, Bt.4797.1.S1_at, Bt.927.1.S1_at, Bt.3050.1.S1_at, Bt.4917.1.S1_at, Bt.9182.1.S1_at, Bt.28064.2.S1_at, Bt.9929.1.A1_at, Bt.2898.3.S1_at, Bt.14150.1.S1_at, Bt.20852.1.A1_at, Bt.2711.1.S1_at,	1	0.907143	75.3593
GOTERM_MF_ALL	GO:0032561~guanyl ribonucleotide binding	21	0.0241	0.0998349	Bt.3573.1.S2_at, Bt.3573.1.S1_at, Bt.27901.1.S1_at, Bt.21708.1.S1_at, Bt.6819.1.S1_at, Bt.15534.1.S1_a_at, Bt.461.1.S1_at, Bt.24676.2.A1_at, Bt.19522.1.S1_at, Bt.7323.1.S1_at, Bt.20141.1.S1_at, Bt.4691.1.S1_at, Bt.4797.1.S1_at, Bt.927.1.S1_at, Bt.3050.1.S1_at, Bt.4917.1.S1_at, Bt.9182.1.S1_at, Bt.28064.2.S1_at, Bt.9929.1.A1_at, Bt.2898.3.S1_at, Bt.14150.1.S1_at, Bt.20852.1.A1_at, Bt.2711.1.S1_at,	1	0.945204	83.3351
GOTERM_MF_ALL	GO:0019001~guanyl nucleotide binding	21	0.0241	0.123965	Bt.3573.1.S2_at, Bt.3573.1.S1_at, Bt.27901.1.S1_at, Bt.21708.1.S1_at, Bt.6819.1.S1_at, Bt.15534.1.S1_a_at, Bt.461.1.S1_at, Bt.24676.2.A1_at, Bt.19522.1.S1_at, Bt.7323.1.S1_at, Bt.20141.1.S1_at, Bt.4691.1.S1_at, Bt.4797.1.S1_at, Bt.927.1.S1_at, Bt.3050.1.S1_at, Bt.4917.1.S1_at, Bt.9182.1.S1_at, Bt.28064.2.S1_at, Bt.9929.1.A1_at, Bt.2898.3.S1_at, Bt.14150.1.S1_at, Bt.20852.1.A1_at, Bt.2711.1.S1_at,	1	0.956676	89.5104
SP_PIR_KEYWORDS	GTP-binding	11	0.0126	0.514762	Bt.3573.1.S2_at, Bt.3573.1.S1_at, Bt.27901.1.S1_at, Bt.461.1.S1_at, Bt.24676.2.A1_at, Bt.7323.1.S1_at, Bt.9182.1.S1_at, Bt.20141.1.S1_at, Bt.2898.3.S1_at, Bt.14150.1.S1_at, Bt.20852.1.A1_at, Bt.927.1.S1_at,	1	0.996059	99.9983
GOTERM_BP_ALL	GO:0007264~small GTPase mediated signal transduction	13	0.0149	0.798165	Bt.27901.1.S1_at, Bt.21708.1.S1_at, Bt.24676.2.A1_at, Bt.461.1.S1_at, Bt.19522.1.S1_at, Bt.21170.1.A1_at, Bt.4691.1.S1_at, Bt.927.1.S1_at, Bt.177.1.S1_at, Bt.4917.1.S1_at, Bt.9182.1.S1_at, Bt.28064.2.S1_at, Bt.9929.1.A1_at, Bt.4549.1.S1_at,	1	0.999998	100
Functional Group 56	Median: 0.34215659267840276	Geo: 0.21023083447520408	Bt.2573.1.S1_at, Bt.4748.1.S1_at, Bt.24627.2.A1_a_at, Bt.11211.1.S1_at, Bt.5141.1.S1_at, Bt.5141.1.S2_at, Bt.4314.1.S1_at, Bt.4557.1.S1_at, Bt.20602.1.S1_at, Bt.1794.1.S1_a_at, Bt.15668.1.S1_at, Bt.21745.1.S1_at, Bt.14103.1.A1_at, Bt.23387.1.A1_at, Bt.9972.1.S1_at, Bt.3049.1.A1_at, Bt.63.1.S1_at, Bt.4273.1.S1_at, Bt.29939.1.S1_at, Bt.29939.2.S1_at, Bt.5154.1.S1_at, Bt.5154.1.S1_s_at, Bt.504.1.S1_…
Category	Term	Count	%	PValue	Genes	Bonferroni	Benjamini	FDR
GOTERM_BP_ALL	GO:0006950~response to stress	37	0.0424	0.0060829	Bt.2573.1.S1_at, Bt.4748.1.S1_at, Bt.24627.2.A1_a_at, Bt.11211.1.S1_at, Bt.5141.1.S1_at, Bt.5141.1.S2_at, Bt.4314.1.S1_at, Bt.4557.1.S1_at, Bt.20602.1.S1_at, Bt.1794.1.S1_a_at, Bt.15668.1.S1_at, Bt.21745.1.S1_at, Bt.14103.1.A1_at, Bt.23387.1.A1_at, Bt.9972.1.S1_at, Bt.3049.1.A1_at, Bt.63.1.S1_at, Bt.4273.1.S1_at, Bt.29939.1.S1_at, Bt.29939.2.S1_at, Bt.5154.1.S1_at, Bt.5154.1.S1_s_at, Bt.504.1.S1_…	1	0.29553	10.519
GOTERM_BP_ALL	GO:0009611~response to wounding	13	0.0149	0.277583	Bt.2573.1.S1_at, Bt.5141.1.S1_at, Bt.5141.1.S2_at, Bt.4314.1.S1_at, Bt.4557.1.S1_at, Bt.4775.1.S1_at, Bt.2498.2.A1_a_at, Bt.1794.1.S1_a_at, Bt.9972.1.S1_at, Bt.22840.1.S1_a_at, Bt.6143.1.S1_at, Bt.278.1.S1_at, Bt.247.1.S1_at, Bt.247.1.S2_at, Bt.4641.1.S1_at,	1	0.985918	99.7323
GOTERM_BP_ALL	GO:0042060~wound healing	6	0.0069	0.285131	Bt.2573.1.S1_at, Bt.5141.1.S1_at, Bt.5141.1.S2_at, Bt.4314.1.S1_at, Bt.4557.1.S1_at, Bt.2498.2.A1_a_at, Bt.247.1.S1_at, Bt.247.1.S2_at,	1	0.9873	99.7789
GOTERM_BP_ALL	GO:0007599~hemostasis	5	0.0057	0.342157	Bt.2573.1.S1_at, Bt.4314.1.S1_at, Bt.4557.1.S1_at, Bt.2498.2.A1_a_at, Bt.247.1.S1_at, Bt.247.1.S2_at,	1	0.993608	99.9514
GOTERM_BP_ALL	GO:0007596~blood coagulation	5	0.0057	0.342157	Bt.2573.1.S1_at, Bt.4314.1.S1_at, Bt.4557.1.S1_at, Bt.2498.2.A1_a_at, Bt.247.1.S1_at, Bt.247.1.S2_at,	1	0.993608	99.9514
GOTERM_BP_ALL	GO:0050817~coagulation	5	0.0057	0.358157	Bt.2573.1.S1_at, Bt.4314.1.S1_at, Bt.4557.1.S1_at, Bt.2498.2.A1_a_at, Bt.247.1.S1_at, Bt.247.1.S2_at,	1	0.99497	99.9689
GOTERM_BP_ALL	GO:0050878~regulation of body fluid levels	5	0.0057	0.390111	Bt.2573.1.S1_at, Bt.4314.1.S1_at, Bt.4557.1.S1_at, Bt.2498.2.A1_a_at, Bt.247.1.S1_at, Bt.247.1.S2_at,	1	0.996904	99.9878
GOTERM_BP_ALL	GO:0009605~response to external stimulus	14	0.016	0.484521	Bt.2573.1.S1_at, Bt.5141.1.S1_at, Bt.5141.1.S2_at, Bt.4314.1.S1_at, Bt.4557.1.S1_at, Bt.4775.1.S1_at, Bt.2498.2.A1_a_at, Bt.1794.1.S1_a_at, Bt.22840.1.S1_a_at, Bt.9972.1.S1_at, Bt.6143.1.S1_at, Bt.278.1.S1_at, Bt.2763.1.S1_at, Bt.247.1.S1_at, Bt.247.1.S2_at, Bt.4641.1.S1_at,	1	0.999208	99.9994
Functional Group 57	Median: 0.20833416310296224	Geo: 0.21642845134215183	Bt.234.1.S1_at, Bt.4775.1.S1_at, Bt.4557.1.S1_at, Bt.1747.1.S1_at, Bt.4641.1.S1_at,
Category	Term	Count	%	PValue	Genes	Bonferroni	Benjamini	FDR
GOTERM_BP_ALL	GO:0042107~cytokine metabolic process	5	0.0057	0.122275	Bt.234.1.S1_at, Bt.4775.1.S1_at, Bt.4557.1.S1_at, Bt.1747.1.S1_at, Bt.4641.1.S1_at,	1	0.897085	90.7057
GOTERM_BP_ALL	GO:0042089~cytokine biosynthetic process	5	0.0057	0.122275	Bt.234.1.S1_at, Bt.4775.1.S1_at, Bt.4557.1.S1_at, Bt.1747.1.S1_at, Bt.4641.1.S1_at,	1	0.897085	90.7057
GOTERM_BP_ALL	GO:0001816~cytokine production	5	0.0057	0.294393	Bt.234.1.S1_at, Bt.4775.1.S1_at, Bt.4557.1.S1_at, Bt.1747.1.S1_at, Bt.4641.1.S1_at,	1	0.988898	99.8256
GOTERM_BP_ALL	GO:0042035~regulation of cytokine biosynthetic process	3	0.0034	0.498486	Bt.4775.1.S1_at, Bt.1747.1.S1_at, Bt.4641.1.S1_at,	1	0.999367	99.9997
Functional Group 58	Median: 0.258865072766057	Geo: 0.21695644424487048	Bt.9750.1.S1_a_at, Bt.1973.1.S1_at, Bt.24628.1.S1_at,
Category	Term	Count	%	PValue	Genes	Bonferroni	Benjamini	FDR
SMART	SM00651:Sm	3	0.0034	0.152395	Bt.9750.1.S1_a_at, Bt.1973.1.S1_at, Bt.24628.1.S1_at,	1	0.999965	90.729
INTERPRO	IPR006649:Like-Sm ribonucleoprotein, eukaryotic and archaea-type, core	3	0.0034	0.258865	Bt.9750.1.S1_a_at, Bt.1973.1.S1_at, Bt.24628.1.S1_at,	1	1	99.5765
INTERPRO	IPR001163:Like-Sm ribonucleoprotein, core	3	0.0034	0.258865	Bt.9750.1.S1_a_at, Bt.1973.1.S1_at, Bt.24628.1.S1_at,	1	1	99.5765
Functional Group 59	Median: 0.30199691644776905	Geo: 0.22615106927222256	Bt.11189.1.S1_at, Bt.9153.1.S1_at, Bt.13134.1.A1_at, Bt.13134.1.S1_at, Bt.5389.1.S1_at, Bt.4619.1.S1_at, Bt.4834.1.S1_at, Bt.18808.1.S1_at, Bt.5006.1.S1_at, Bt.16068.1.A1_at, Bt.742.1.S2_at, Bt.20455.1.S1_at,
Category	Term	Count	%	PValue	Genes	Bonferroni	Benjamini	FDR
GOTERM_BP_ALL	GO:0031324~negative regulation of cellular metabolic process	9	0.0103	0.0604724	Bt.11189.1.S1_at, Bt.9153.1.S1_at, Bt.13134.1.A1_at, Bt.13134.1.S1_at, Bt.5389.1.S1_at, Bt.4619.1.S1_at, Bt.4834.1.S1_at, Bt.18808.1.S1_at, Bt.5006.1.S1_at, Bt.16068.1.A1_at, Bt.742.1.S2_at,	1	0.749625	67.8988
GOTERM_BP_ALL	GO:0017148~negative regulation of translation	3	0.0034	0.249598	Bt.11189.1.S1_at, Bt.5389.1.S1_at, Bt.5006.1.S1_at,	1	0.981082	99.465
GOTERM_BP_ALL	GO:0031327~negative regulation of cellular biosynthetic process	3	0.0034	0.301997	Bt.11189.1.S1_at, Bt.5389.1.S1_at, Bt.5006.1.S1_at,	1	0.989457	99.8569
GOTERM_BP_ALL	GO:0051248~negative regulation of protein metabolic process	4	0.0046	0.321184	Bt.11189.1.S1_at, Bt.5389.1.S1_at, Bt.20455.1.S1_at, Bt.5006.1.S1_at,	1	0.992312	99.9139
GOTERM_BP_ALL	GO:0009890~negative regulation of biosynthetic process	3	0.0034	0.404053	Bt.11189.1.S1_at, Bt.5389.1.S1_at, Bt.5006.1.S1_at,	1	0.997483	99.992
Functional Group 60	Median: 0.4565055218912747	Geo: 0.23321876081410264	Bt.6438.1.A1_at, Bt.4775.1.S1_at, Bt.4138.1.S1_a_at, Bt.8131.1.S1_at, Bt.5517.1.S2_at, Bt.983.1.S1_at, Bt.2573.1.S1_at, Bt.4816.1.S1_at, Bt.5141.1.S1_at, Bt.5141.1.S2_at, Bt.4834.1.S1_at, Bt.234.1.S1_at, Bt.4314.1.S1_at, Bt.13220.1.S1_at,
Category	Term	Count	%	PValue	Genes	Bonferroni	Benjamini	FDR
GOTERM_BP_ALL	GO:0000904~cellular morphogenesis during differentiation	6	0.0069	0.0253569	Bt.6438.1.A1_at, Bt.4775.1.S1_at, Bt.4138.1.S1_a_at, Bt.8131.1.S1_at, Bt.5517.1.S2_at, Bt.983.1.S1_at,	1	0.537227	37.3658
GOTERM_BP_ALL	GO:0048646~anatomical structure formation	7	0.008	0.0784763	Bt.2573.1.S1_at, Bt.4816.1.S1_at, Bt.5141.1.S1_at, Bt.5141.1.S2_at, Bt.4834.1.S1_at, Bt.234.1.S1_at, Bt.4314.1.S1_at, Bt.4138.1.S1_a_at,	1	0.805915	77.4342
GOTERM_BP_ALL	GO:0008285~negative regulation of cell proliferation	5	0.0057	0.26305	Bt.2573.1.S1_at, Bt.6438.1.A1_at, Bt.5141.1.S1_at, Bt.5141.1.S2_at, Bt.4834.1.S1_at, Bt.13220.1.S1_at,	1	0.983403	99.6152
GOTERM_BP_ALL	GO:0006928~cell motility	5	0.0057	0.649961	Bt.2573.1.S1_at, Bt.6438.1.A1_at, Bt.5141.1.S1_at, Bt.5141.1.S2_at, Bt.4138.1.S1_a_at, Bt.8131.1.S1_at,	1	0.99995	100
GOTERM_BP_ALL	GO:0051674~localization of cell	5	0.0057	0.649961	Bt.2573.1.S1_at, Bt.6438.1.A1_at, Bt.5141.1.S1_at, Bt.5141.1.S2_at, Bt.4138.1.S1_a_at, Bt.8131.1.S1_at,	1	0.99995	100
GOTERM_BP_ALL	GO:0016477~cell migration	4	0.0046	0.727668	Bt.6438.1.A1_at, Bt.5141.1.S1_at, Bt.5141.1.S2_at, Bt.4138.1.S1_a_at, Bt.8131.1.S1_at,	1	0.999989	100
Functional Group 61	Median: 0.237711706796061	Geo: 0.23741432347259744	Bt.21503.1.S1_at, Bt.5131.1.S1_at, Bt.20931.1.S1_at, Bt.12126.1.S1_at,
Category	Term	Count	%	PValue	Genes	Bonferroni	Benjamini	FDR
GOTERM_BP_ALL	GO:0005976~polysaccharide metabolic process	4	0.0046	0.225825	Bt.21503.1.S1_at, Bt.5131.1.S1_at, Bt.20931.1.S1_at, Bt.12126.1.S1_at,	1	0.974622	99.0557
GOTERM_BP_ALL	GO:0044264~cellular polysaccharide metabolic process	4	0.0046	0.225825	Bt.21503.1.S1_at, Bt.5131.1.S1_at, Bt.20931.1.S1_at, Bt.12126.1.S1_at,	1	0.974622	99.0557
GOTERM_BP_ALL	GO:0006073~glucan metabolic process	3	0.0034	0.249598	Bt.21503.1.S1_at, Bt.20931.1.S1_at, Bt.12126.1.S1_at,	1	0.981082	99.465
GOTERM_BP_ALL	GO:0005977~glycogen metabolic process	3	0.0034	0.249598	Bt.21503.1.S1_at, Bt.20931.1.S1_at, Bt.12126.1.S1_at,	1	0.981082	99.465
Functional Group 62	Median: 0.24891930712303006	Geo: 0.26448157748724593	Bt.19709.1.S1_at, Bt.21493.1.S1_at, Bt.5449.1.S1_at, Bt.5049.1.S1_at, Bt.714.1.S1_at, Bt.5150.1.S1_at, Bt.7157.1.S1_at,
Category	Term	Count	%	PValue	Genes	Bonferroni	Benjamini	FDR
GOTERM_CC_ALL	GO:0031965~nuclear membrane	5	0.0057	0.242038	Bt.19709.1.S1_at, Bt.21493.1.S1_at, Bt.5449.1.S1_at, Bt.5049.1.S1_at, Bt.714.1.S1_at,	1	0.762344	98.2651
GOTERM_CC_ALL	GO:0005635~nuclear envelope	7	0.008	0.248919	Bt.19709.1.S1_at, Bt.21493.1.S1_at, Bt.5449.1.S1_at, Bt.5049.1.S1_at, Bt.5150.1.S1_at, Bt.714.1.S1_at, Bt.7157.1.S1_at,	1	0.770213	98.4818
GOTERM_CC_ALL	GO:0044453~nuclear membrane part	4	0.0046	0.307074	Bt.21493.1.S1_at, Bt.5449.1.S1_at, Bt.5049.1.S1_at, Bt.714.1.S1_at,	1	0.832424	99.533
Functional Group 63	Median: 0.21614470910004846	Geo: 0.2694531291008411	Bt.1059.2.S1_at, Bt.27347.1.A1_at, Bt.8872.1.S2_at, Bt.1990.1.S1_at,
Category	Term	Count	%	PValue	Genes	Bonferroni	Benjamini	FDR
INTERPRO	IPR001757:ATPase, P-type, K/Mg/Cd/Cu/Zn/Na/Ca/Na/H-transporter	3	0.0034	0.17417	Bt.1059.2.S1_at, Bt.27347.1.A1_at, Bt.8872.1.S2_at,	1	1	96.9518
INTERPRO	IPR005834:Haloacid dehalogenase-like hydrolase	3	0.0034	0.216145	Bt.1059.2.S1_at, Bt.27347.1.A1_at, Bt.8872.1.S2_at,	1	1	98.8229
GOTERM_MF_ALL	GO:0015662~ATPase activity, coupled to transmembrane movement of ions, phosphorylative mechanism	4	0.0046	0.519675	Bt.1059.2.S1_at, Bt.27347.1.A1_at, Bt.1990.1.S1_at, Bt.8872.1.S2_at,	1	0.999975	99.9996
Functional Group 64	Median: 0.2950986723031453	Geo: 0.27159783097425555	Bt.250.1.S1_at, Bt.8496.1.S1_at, Bt.12559.1.S1_at, Bt.29879.1.S1_at, Bt.721.1.A1_at, Bt.29879.1.A1_at, Bt.29570.1.S1_at, Bt.22763.2.S1_a_at, Bt.22763.1.S1_at, Bt.7594.1.S1_at, Bt.6289.1.S1_at, Bt.22854.2.S1_at, Bt.4599.1.S1_at,
Category	Term	Count	%	PValue	Genes	Bonferroni	Benjamini	FDR
GOTERM_MF_ALL	GO:0016746~transferase activity, transferring acyl groups	10	0.0115	0.104899	Bt.250.1.S1_at, Bt.8496.1.S1_at, Bt.12559.1.S1_at, Bt.29879.1.S1_at, Bt.721.1.A1_at, Bt.29879.1.A1_at, Bt.29570.1.S1_at, Bt.22763.2.S1_a_at, Bt.22763.1.S1_at, Bt.7594.1.S1_at, Bt.6289.1.S1_at, Bt.22854.2.S1_at, Bt.4599.1.S1_at,	1	0.95095	84.8622
GOTERM_MF_ALL	GO:0008415~acyltransferase activity	8	0.0092	0.215381	Bt.250.1.S1_at, Bt.8496.1.S1_at, Bt.29879.1.S1_at, Bt.721.1.A1_at, Bt.29879.1.A1_at, Bt.29570.1.S1_at, Bt.7594.1.S1_at, Bt.6289.1.S1_at, Bt.22854.2.S1_at, Bt.4599.1.S1_at,	1	0.990668	98.3955
GOTERM_MF_ALL	GO:0016747~transferase activity, transferring groups other than amino-acyl groups	8	0.0092	0.224752	Bt.250.1.S1_at, Bt.8496.1.S1_at, Bt.29879.1.S1_at, Bt.721.1.A1_at, Bt.29879.1.A1_at, Bt.29570.1.S1_at, Bt.7594.1.S1_at, Bt.6289.1.S1_at, Bt.22854.2.S1_at, Bt.4599.1.S1_at,	1	0.992212	98.6925
GOTERM_MF_ALL	GO:0016407~acetyltransferase activity	3	0.0034	0.365446	Bt.29879.1.S1_at, Bt.721.1.A1_at, Bt.29879.1.A1_at, Bt.7594.1.S1_at, Bt.22854.2.S1_at,	1	0.999454	99.9569
GOTERM_MF_ALL	GO:0016410~N-acyltransferase activity	3	0.0034	0.388653	Bt.250.1.S1_at, Bt.29879.1.S1_at, Bt.721.1.A1_at, Bt.29879.1.A1_at, Bt.7594.1.S1_at,	1	0.999609	99.9771
SP_PIR_KEYWORDS	acyltransferase	5	0.0057	0.556535	Bt.250.1.S1_at, Bt.29570.1.S1_at, Bt.7594.1.S1_at, Bt.6289.1.S1_at, Bt.4599.1.S1_at,	1	0.997611	99.9996
Functional Group 65	Median: 0.29409046188497195	Geo: 0.2748973160722274	Bt.1316.1.S1_at, Bt.1316.1.S2_at, Bt.5400.1.S1_at, Bt.13053.1.A1_at, Bt.6289.1.S1_at,
Category	Term	Count	%	PValue	Genes	Bonferroni	Benjamini	FDR
GOTERM_MF_ALL	GO:0016769~transferase activity, transferring nitrogenous groups	4	0.0046	0.209354	Bt.1316.1.S1_at, Bt.1316.1.S2_at, Bt.5400.1.S1_at, Bt.13053.1.A1_at, Bt.6289.1.S1_at,	1	0.990178	98.1721
GOTERM_MF_ALL	GO:0008483~transaminase activity	3	0.0034	0.29409	Bt.1316.1.S1_at, Bt.1316.1.S2_at, Bt.5400.1.S1_at, Bt.13053.1.A1_at,	1	0.997708	99.735
SP_PIR_KEYWORDS	aminotransferase	3	0.0034	0.337404	Bt.1316.1.S1_at, Bt.1316.1.S2_at, Bt.5400.1.S1_at, Bt.13053.1.A1_at,	1	0.978276	99.8065
Functional Group 66	Median: 0.6208743550942197	Geo: 0.28374819213503644	Bt.15993.1.S1_s_at, Bt.27417.2.S1_at, Bt.4426.1.S1_at, Bt.20600.1.A1_at, Bt.2898.3.S1_at, Bt.19676.2.S1_a_at, Bt.11606.2.S1_at,
Category	Term	Count	%	PValue	Genes	Bonferroni	Benjamini	FDR
GOTERM_BP_ALL	GO:0042254~ribosome biogenesis and assembly	7	0.008	0.0592641	Bt.15993.1.S1_s_at, Bt.27417.2.S1_at, Bt.4426.1.S1_at, Bt.20600.1.A1_at, Bt.2898.3.S1_at, Bt.19676.2.S1_a_at, Bt.11606.2.S1_at,	1	0.749411	67.1384
GOTERM_BP_ALL	GO:0006364~rRNA processing	3	0.0034	0.620874	Bt.27417.2.S1_at, Bt.19676.2.S1_a_at, Bt.11606.2.S1_at,	1	0.999912	100
GOTERM_BP_ALL	GO:0016072~rRNA metabolic process	3	0.0034	0.620874	Bt.27417.2.S1_at, Bt.19676.2.S1_a_at, Bt.11606.2.S1_at,	1	0.999912	100
Functional Group 67	Median: 0.29492581621655956	Geo: 0.28524364689276105	Bt.6438.1.A1_at, Bt.5141.1.S1_at, Bt.5141.1.S2_at, Bt.4834.1.S1_at, Bt.234.1.S1_at, Bt.58.1.S1_at, Bt.18808.1.S1_at, Bt.4641.1.S1_at, Bt.4138.1.S1_a_at, Bt.29570.1.S1_at, Bt.3583.1.S1_at, Bt.177.1.S1_at, Bt.12631.3.S1_at,
Category	Term	Count	%	PValue	Genes	Bonferroni	Benjamini	FDR
GOTERM_BP_ALL	GO:0008284~positive regulation of cell proliferation	7	0.008	0.0855735	Bt.6438.1.A1_at, Bt.5141.1.S1_at, Bt.5141.1.S2_at, Bt.4834.1.S1_at, Bt.234.1.S1_at, Bt.58.1.S1_at, Bt.18808.1.S1_at, Bt.4641.1.S1_at,	1	0.828419	80.3986
GOTERM_BP_ALL	GO:0007423~sensory organ development	4	0.0046	0.154582	Bt.6438.1.A1_at, Bt.4834.1.S1_at, Bt.18808.1.S1_at, Bt.4138.1.S1_a_at,	1	0.934634	95.3061
GOTERM_BP_ALL	GO:0045927~positive regulation of growth	3	0.0034	0.17204	Bt.6438.1.A1_at, Bt.29570.1.S1_at, Bt.4641.1.S1_at,	1	0.949897	96.7903
GOTERM_BP_ALL	GO:0045165~cell fate commitment	3	0.0034	0.249598	Bt.6438.1.A1_at, Bt.4834.1.S1_at, Bt.18808.1.S1_at,	1	0.981082	99.465
GOTERM_BP_ALL	GO:0050793~regulation of developmental process	6	0.0069	0.340253	Bt.6438.1.A1_at, Bt.3583.1.S1_at, Bt.4834.1.S1_at, Bt.18808.1.S1_at, Bt.177.1.S1_at, Bt.4641.1.S1_at,	1	0.99362	99.9487
GOTERM_BP_ALL	GO:0045595~regulation of cell differentiation	4	0.0046	0.378951	Bt.6438.1.A1_at, Bt.4834.1.S1_at, Bt.18808.1.S1_at, Bt.4641.1.S1_at,	1	0.996393	99.983
GOTERM_BP_ALL	GO:0040008~regulation of growth	4	0.0046	0.739152	Bt.6438.1.A1_at, Bt.4834.1.S1_at, Bt.29570.1.S1_at, Bt.4641.1.S1_at,	1	0.999991	100
GOTERM_BP_ALL	GO:0040007~growth	5	0.0057	0.809543	Bt.6438.1.A1_at, Bt.4834.1.S1_at, Bt.29570.1.S1_at, Bt.12631.3.S1_at, Bt.4641.1.S1_at,	1	0.999999	100
Functional Group 68	Median: 0.2886530559409334	Geo: 0.2862547440544373	Bt.224.1.S1_at, Bt.2573.1.S1_at, Bt.5141.1.S1_at, Bt.5141.1.S2_at, Bt.22840.1.S1_a_at, Bt.15436.2.S1_a_at, Bt.15436.1.S1_s_at, Bt.2712.1.S1_at, Bt.9889.1.S1_at, Bt.28119.1.S1_at,
Category	Term	Count	%	PValue	Genes	Bonferroni	Benjamini	FDR
GOTERM_BP_ALL	GO:0009566~fertilization	4	0.0046	0.24455	Bt.224.1.S1_at, Bt.2573.1.S1_at, Bt.5141.1.S1_at, Bt.5141.1.S2_at, Bt.22840.1.S1_a_at,	1	0.980559	99.3955
GOTERM_BP_ALL	GO:0007338~single fertilization	4	0.0046	0.24455	Bt.224.1.S1_at, Bt.2573.1.S1_at, Bt.5141.1.S1_at, Bt.5141.1.S2_at, Bt.22840.1.S1_a_at,	1	0.980559	99.3955
GOTERM_BP_ALL	GO:0019953~sexual reproduction	8	0.0092	0.332756	Bt.224.1.S1_at, Bt.2573.1.S1_at, Bt.15436.2.S1_a_at, Bt.15436.1.S1_s_at, Bt.5141.1.S1_at, Bt.5141.1.S2_at, Bt.22840.1.S1_a_at, Bt.2712.1.S1_at, Bt.9889.1.S1_at, Bt.28119.1.S1_at,	1	0.992811	99.937
SP_PIR_KEYWORDS	fertilization	3	0.0034	0.337404	Bt.224.1.S1_at, Bt.2573.1.S1_at, Bt.22840.1.S1_a_at,	1	0.978276	99.8065
Functional Group 69	Median: 0.2767085743506302	Geo: 0.3006606603550493	Bt.946.1.S1_at, Bt.461.1.S1_at, Bt.4773.3.A1_at, Bt.20852.1.A1_at, Bt.927.1.S1_at, Bt.7194.1.S1_at, Bt.212.1.S1_at,
Category	Term	Count	%	PValue	Genes	Bonferroni	Benjamini	FDR
SP_PIR_KEYWORDS	P-loop	6	0.0069	0.23927	Bt.946.1.S1_at, Bt.461.1.S1_at, Bt.4773.3.A1_at, Bt.20852.1.A1_at, Bt.927.1.S1_at, Bt.7194.1.S1_at,	1	0.945694	98.4253
SP_PIR_KEYWORDS	myristylation	4	0.0046	0.276709	Bt.461.1.S1_at, Bt.20852.1.A1_at, Bt.927.1.S1_at, Bt.212.1.S1_at,	1	0.959947	99.268
SP_PIR_KEYWORDS	nucleotide binding	5	0.0057	0.410506	Bt.461.1.S1_at, Bt.4773.3.A1_at, Bt.20852.1.A1_at, Bt.927.1.S1_at, Bt.7194.1.S1_at,	1	0.987279	99.9672
Functional Group 70	Median: 0.25267805753242756	Geo: 0.31799508457084075	Bt.2573.1.S1_at, Bt.5141.1.S1_at, Bt.5141.1.S2_at, Bt.2626.1.S1_at, Bt.234.1.S1_at, Bt.12761.1.A1_at, Bt.177.1.S1_at, Bt.4107.1.S1_at, Bt.11241.1.S1_at, Bt.13021.1.S1_at, Bt.3210.1.S1_at, Bt.6074.1.S1_at, Bt.26992.1.A1_at, Bt.2632.1.S1_at, Bt.20230.1.S1_at, Bt.9972.1.S1_at, Bt.18808.1.S1_at, Bt.13744.1.A1_at, Bt.8131.1.S1_at, Bt.24343.1.A1_at, Bt.12177.1.S1_at, Bt.16441.1.A1_at, Bt.4641.1.S1_at,
Category	Term	Count	%	PValue	Genes	Bonferroni	Benjamini	FDR
GOTERM_BP_ALL	GO:0007155~cell adhesion	21	0.0241	0.252678	Bt.2573.1.S1_at, Bt.5141.1.S1_at, Bt.5141.1.S2_at, Bt.2626.1.S1_at, Bt.234.1.S1_at, Bt.12761.1.A1_at, Bt.177.1.S1_at, Bt.4107.1.S1_at, Bt.11241.1.S1_at, Bt.13021.1.S1_at, Bt.3210.1.S1_at, Bt.6074.1.S1_at, Bt.26992.1.A1_at, Bt.2632.1.S1_at, Bt.20230.1.S1_at, Bt.9972.1.S1_at, Bt.18808.1.S1_at, Bt.13744.1.A1_at, Bt.8131.1.S1_at, Bt.24343.1.A1_at, Bt.12177.1.S1_at, Bt.16441.1.A1_at, Bt.4641.1.S1_at,	1	0.98122	99.5036
GOTERM_BP_ALL	GO:0022610~biological adhesion	21	0.0241	0.252678	Bt.2573.1.S1_at, Bt.5141.1.S1_at, Bt.5141.1.S2_at, Bt.2626.1.S1_at, Bt.234.1.S1_at, Bt.12761.1.A1_at, Bt.177.1.S1_at, Bt.4107.1.S1_at, Bt.11241.1.S1_at, Bt.13021.1.S1_at, Bt.3210.1.S1_at, Bt.6074.1.S1_at, Bt.26992.1.A1_at, Bt.2632.1.S1_at, Bt.20230.1.S1_at, Bt.9972.1.S1_at, Bt.18808.1.S1_at, Bt.13744.1.A1_at, Bt.8131.1.S1_at, Bt.24343.1.A1_at, Bt.12177.1.S1_at, Bt.16441.1.A1_at, Bt.4641.1.S1_at,	1	0.98122	99.5036
SP_PIR_KEYWORDS	cell adhesion	10	0.0115	0.503647	Bt.2573.1.S1_at, Bt.2626.1.S1_at, Bt.2632.1.S1_at, Bt.9972.1.S1_at, Bt.20230.1.S1_at, Bt.13744.1.A1_at, Bt.8131.1.S1_at, Bt.12761.1.A1_at, Bt.4107.1.S1_at, Bt.11241.1.S1_at, Bt.13021.1.S1_at,	1	0.99557	99.9976
Functional Group 71	Median: 0.45242807519921735	Geo: 0.33507092900575797	Bt.6438.1.A1_at, Bt.5141.1.S1_at, Bt.5141.1.S2_at, Bt.2632.1.S1_at, Bt.18325.1.A1_at, Bt.18325.2.A1_a_at, Bt.1794.1.S1_a_at, Bt.18808.1.S1_at, Bt.4138.1.S1_a_at, Bt.24887.1.S1_at,
Category	Term	Count	%	PValue	Genes	Bonferroni	Benjamini	FDR
GOTERM_BP_ALL	GO:0048771~tissue remodeling	5	0.0057	0.134592	Bt.6438.1.A1_at, Bt.5141.1.S1_at, Bt.5141.1.S2_at, Bt.2632.1.S1_at, Bt.18325.1.A1_at, Bt.18325.2.A1_a_at, Bt.1794.1.S1_a_at,	1	0.915292	92.8152
GOTERM_BP_ALL	GO:0009888~tissue development	7	0.008	0.217314	Bt.6438.1.A1_at, Bt.2632.1.S1_at, Bt.18808.1.S1_at, Bt.18325.1.A1_at, Bt.18325.2.A1_a_at, Bt.4138.1.S1_a_at, Bt.24887.1.S1_at, Bt.1794.1.S1_a_at,	1	0.973387	98.8476
GOTERM_BP_ALL	GO:0001503~ossification	3	0.0034	0.452428	Bt.2632.1.S1_at, Bt.18325.1.A1_at, Bt.18325.2.A1_a_at, Bt.1794.1.S1_a_at,	1	0.998805	99.9983
GOTERM_BP_ALL	GO:0031214~biomineral formation	3	0.0034	0.452428	Bt.2632.1.S1_at, Bt.18325.1.A1_at, Bt.18325.2.A1_a_at, Bt.1794.1.S1_a_at,	1	0.998805	99.9983
GOTERM_BP_ALL	GO:0001501~skeletal development	4	0.0046	0.454085	Bt.6438.1.A1_at, Bt.2632.1.S1_at, Bt.18325.1.A1_at, Bt.18325.2.A1_a_at, Bt.1794.1.S1_a_at,	1	0.99868	99.9984
GOTERM_BP_ALL	GO:0046849~bone remodeling	3	0.0034	0.520567	Bt.2632.1.S1_at, Bt.18325.1.A1_at, Bt.18325.2.A1_a_at, Bt.1794.1.S1_a_at,	1	0.999501	99.9998
Functional Group 72	Median: 0.42151997115187423	Geo: 0.3406013464749482	Bt.7236.1.S1_at, Bt.10831.1.S1_at, Bt.177.1.S1_at, Bt.4641.1.S1_at, Bt.11739.2.A1_a_at, Bt.11739.1.S1_a_at,
Category	Term	Count	%	PValue	Genes	Bonferroni	Benjamini	FDR
SMART	SM00252:SH2	5	0.0057	0.20359	Bt.7236.1.S1_at, Bt.10831.1.S1_at, Bt.177.1.S1_at, Bt.4641.1.S1_at, Bt.11739.2.A1_a_at, Bt.11739.1.S1_a_at,	1	0.999918	96.2162
INTERPRO	IPR000980:SH2 motif	5	0.0057	0.42152	Bt.7236.1.S1_at, Bt.10831.1.S1_at, Bt.177.1.S1_at, Bt.4641.1.S1_at, Bt.11739.2.A1_a_at, Bt.11739.1.S1_a_at,	1	1	99.9954
SP_PIR_KEYWORDS	sh2 domain	4	0.0046	0.46043	Bt.7236.1.S1_at, Bt.177.1.S1_at, Bt.4641.1.S1_at, Bt.11739.2.A1_a_at, Bt.11739.1.S1_a_at,	1	0.993149	99.9914
Functional Group 73	Median: 0.5213338341409085	Geo: 0.34633682677539734	Bt.20294.1.S1_at, Bt.2353.1.S1_at, Bt.1576.1.S1_at, Bt.3137.1.S1_at, Bt.28064.2.S1_at, Bt.9929.1.A1_at, Bt.20455.1.S1_at, Bt.2612.1.S1_at, Bt.15534.1.S1_a_at, Bt.2.1.S1_at, Bt.28119.1.S1_at, Bt.24529.2.A1_at, Bt.3583.1.S1_at, Bt.1404.2.S1_at, Bt.1404.1.S1_at, Bt.1404.3.A1_at, Bt.28500.1.S1_at, Bt.21415.1.S1_at, Bt.8924.1.S1_at, Bt.23608.1.S1_s_at, Bt.28009.1.A1_at, Bt.12663.1.S1_at, Bt.20275.1.S1…
Category	Term	Count	%	PValue	Genes	Bonferroni	Benjamini	FDR
GOTERM_MF_ALL	GO:0015631~tubulin binding	5	0.0057	0.0471472	Bt.20294.1.S1_at, Bt.2353.1.S1_at, Bt.1576.1.S1_at, Bt.3137.1.S1_at, Bt.28064.2.S1_at, Bt.9929.1.A1_at,	1	0.808821	56.0792
GOTERM_CC_ALL	GO:0005874~microtubule	9	0.0103	0.160852	Bt.20455.1.S1_at, Bt.2612.1.S1_at, Bt.15534.1.S1_a_at, Bt.2353.1.S1_at, Bt.1576.1.S1_at, Bt.3137.1.S1_at, Bt.2.1.S1_at, Bt.28119.1.S1_at, Bt.24529.2.A1_at,	1	0.625462	92.3127
GOTERM_BP_ALL	GO:0000226~microtubule cytoskeleton organization and biogenesis	4	0.0046	0.207397	Bt.20455.1.S1_at, Bt.20294.1.S1_at, Bt.1576.1.S1_at, Bt.3137.1.S1_at,	1	0.96891	98.5506
GOTERM_CC_ALL	GO:0015630~microtubule cytoskeleton	12	0.0137	0.388799	Bt.3583.1.S1_at, Bt.20455.1.S1_at, Bt.2612.1.S1_at, Bt.15534.1.S1_a_at, Bt.2353.1.S1_at, Bt.1576.1.S1_at, Bt.3137.1.S1_at, Bt.28064.2.S1_at, Bt.9929.1.A1_at, Bt.2.1.S1_at, Bt.28119.1.S1_at, Bt.1404.2.S1_at, Bt.1404.1.S1_at, Bt.1404.3.A1_at, Bt.24529.2.A1_at,	1	0.899494	99.9255
GOTERM_CC_ALL	GO:0044430~cytoskeletal part	16	0.0183	0.653869	Bt.20455.1.S1_at, Bt.15534.1.S1_a_at, Bt.28500.1.S1_at, Bt.21415.1.S1_at, Bt.8924.1.S1_at, Bt.3137.1.S1_at, Bt.2.1.S1_at, Bt.23608.1.S1_s_at, Bt.28009.1.A1_at, Bt.3583.1.S1_at, Bt.2612.1.S1_at, Bt.12663.1.S1_at, Bt.2353.1.S1_at, Bt.28064.2.S1_at, Bt.9929.1.A1_at, Bt.1576.1.S1_at, Bt.28119.1.S1_at, Bt.1404.2.S1_at, Bt.1404.1.S1_at, Bt.1404.3.A1_at, Bt.24529.2.A1_at,	1	0.985646	100
GOTERM_BP_ALL	GO:0007017~microtubule-based process	6	0.0069	0.732423	Bt.20455.1.S1_at, Bt.20294.1.S1_at, Bt.15534.1.S1_a_at, Bt.1576.1.S1_at, Bt.3137.1.S1_at, Bt.1404.2.S1_at, Bt.1404.1.S1_at, Bt.1404.3.A1_at,	1	0.99999	100
GOTERM_CC_ALL	GO:0005856~cytoskeleton	23	0.0263	0.788493	Bt.20455.1.S1_at, Bt.15534.1.S1_a_at, Bt.20275.1.S1_at, Bt.28500.1.S1_at, Bt.21415.1.S1_at, Bt.8924.1.S1_at, Bt.3137.1.S1_at, Bt.2.1.S1_at, Bt.23608.1.S1_s_at, Bt.28009.1.A1_at, Bt.4107.1.S1_at, Bt.26810.1.S1_at, Bt.3210.1.S1_at, Bt.8479.1.A1_at, Bt.3583.1.S1_at, Bt.2612.1.S1_at, Bt.20230.1.S1_at, Bt.12663.1.S1_at, Bt.28699.1.S1_at, Bt.2353.1.S1_at, Bt.1576.1.S1_at, Bt.28064.2.S1_at, Bt.9929.1.A1…	1	0.997521	100
SP_PIR_KEYWORDS	microtubule	3	0.0034	0.896454	Bt.20455.1.S1_at, Bt.1576.1.S1_at, Bt.3137.1.S1_at,	1	0.999994	100
Functional Group 74	Median: 0.4356119785369231	Geo: 0.3513744868507048	Bt.2573.1.S1_at, Bt.29698.1.A1_at, Bt.13163.1.A1_at, Bt.13163.1.S1_at, Bt.3562.1.S1_at, Bt.5308.1.S1_at, Bt.10880.1.S1_at, Bt.1794.1.S1_a_at,
Category	Term	Count	%	PValue	Genes	Bonferroni	Benjamini	FDR
GOTERM_BP_ALL	GO:0016044~membrane organization and biogenesis	7	0.008	0.228618	Bt.2573.1.S1_at, Bt.29698.1.A1_at, Bt.13163.1.A1_at, Bt.13163.1.S1_at, Bt.3562.1.S1_at, Bt.5308.1.S1_at, Bt.10880.1.S1_at, Bt.1794.1.S1_a_at,	1	0.975125	99.1159
GOTERM_BP_ALL	GO:0010324~membrane invagination	4	0.0046	0.435612	Bt.29698.1.A1_at, Bt.13163.1.A1_at, Bt.13163.1.S1_at, Bt.3562.1.S1_at, Bt.1794.1.S1_a_at,	1	0.998531	99.997
GOTERM_BP_ALL	GO:0006897~endocytosis	4	0.0046	0.435612	Bt.29698.1.A1_at, Bt.13163.1.A1_at, Bt.13163.1.S1_at, Bt.3562.1.S1_at, Bt.1794.1.S1_a_at,	1	0.998531	99.997
Functional Group 75	Median: 0.5531864087964884	Geo: 0.3752219648848834	Bt.714.1.S1_at, Bt.23128.2.A1_at, Bt.3080.1.S1_a_at, Bt.3786.1.S1_a_at, Bt.20584.1.S1_at, Bt.5024.1.S1_at, Bt.16108.1.A1_at, Bt.4797.1.S1_at,
Category	Term	Count	%	PValue	Genes	Bonferroni	Benjamini	FDR
GOTERM_MF_ALL	GO:0016860~intramolecular oxidoreductase activity	5	0.0057	0.108564	Bt.714.1.S1_at, Bt.23128.2.A1_at, Bt.3080.1.S1_a_at, Bt.3786.1.S1_a_at, Bt.20584.1.S1_at,	1	0.941266	85.8843
GOTERM_MF_ALL	GO:0016853~isomerase activity	8	0.0092	0.553186	Bt.5024.1.S1_at, Bt.714.1.S1_at, Bt.23128.2.A1_at, Bt.3080.1.S1_a_at, Bt.16108.1.A1_at, Bt.3786.1.S1_a_at, Bt.20584.1.S1_at, Bt.4797.1.S1_at,	1	0.999988	99.9999
SP_PIR_KEYWORDS	isomerase	4	0.0046	0.879646	Bt.5024.1.S1_at, Bt.23128.2.A1_at, Bt.3080.1.S1_a_at, Bt.3786.1.S1_a_at,	1	0.999989	100
Functional Group 76	Median: 0.34874326821361934	Geo: 0.3825815607210578	Bt.461.1.S1_at, Bt.20852.1.A1_at, Bt.927.1.S1_at, Bt.212.1.S1_at, Bt.9643.1.S1_at, Bt.13592.1.A1_at, Bt.9182.1.S1_at,
Category	Term	Count	%	PValue	Genes	Bonferroni	Benjamini	FDR
SP_PIR_KEYWORDS	myristylation	4	0.0046	0.276709	Bt.461.1.S1_at, Bt.20852.1.A1_at, Bt.927.1.S1_at, Bt.212.1.S1_at,	1	0.959947	99.268
SP_PIR_KEYWORDS	myristate	6	0.0069	0.348743	Bt.9643.1.S1_at, Bt.13592.1.A1_at, Bt.461.1.S1_at, Bt.9182.1.S1_at, Bt.927.1.S1_at, Bt.212.1.S1_at,	1	0.979584	99.8511
UP_SEQ_FEATURE	lipid moiety-binding region:N-myristoyl glycine	4	0.0046	0.580288	Bt.13592.1.A1_at, Bt.461.1.S1_at, Bt.927.1.S1_at, Bt.212.1.S1_at,	1	1	100
Functional Group 77	Median: 0.4648254547338395	Geo: 0.3927634436337533	Bt.265.1.S1_at, Bt.4637.1.A1_a_at, Bt.9826.1.S1_at, Bt.77.1.S1_at, Bt.1280.2.S1_a_at, Bt.11714.1.S1_at, Bt.4970.1.S1_at, Bt.10880.1.S1_at,
Category	Term	Count	%	PValue	Genes	Bonferroni	Benjamini	FDR
SP_PIR_KEYWORDS	inner membrane	8	0.0092	0.258052	Bt.265.1.S1_at, Bt.4637.1.A1_a_at, Bt.9826.1.S1_at, Bt.77.1.S1_at, Bt.1280.2.S1_a_at, Bt.11714.1.S1_at, Bt.4970.1.S1_at, Bt.10880.1.S1_at,	1	0.950471	98.9226
UP_SEQ_FEATURE	topological domain:Mitochondrial matrix	3	0.0034	0.464825	Bt.4637.1.A1_a_at, Bt.77.1.S1_at, Bt.10880.1.S1_at,	1	1	99.9989
UP_SEQ_FEATURE	topological domain:Mitochondrial intermembrane	3	0.0034	0.505122	Bt.4637.1.A1_a_at, Bt.77.1.S1_at, Bt.10880.1.S1_at,	1	1	99.9997
Functional Group 78	Median: 0.3697322678421143	Geo: 0.40780917379234793	Bt.11211.1.S1_at, Bt.557.1.S1_at, Bt.23659.1.S1_at, Bt.4793.1.S1_at, Bt.4793.1.S2_at, Bt.21137.2.S1_at, Bt.21137.1.S1_at, Bt.13537.1.A1_at, Bt.4627.1.S1_at, Bt.4646.1.S1_at, Bt.759.1.S1_at,
Category	Term	Count	%	PValue	Genes	Bonferroni	Benjamini	FDR
GOTERM_MF_ALL	GO:0015293~symporter activity	7	0.008	0.188755	Bt.11211.1.S1_at, Bt.557.1.S1_at, Bt.23659.1.S1_at, Bt.4793.1.S1_at, Bt.4793.1.S2_at, Bt.21137.2.S1_at, Bt.21137.1.S1_at, Bt.13537.1.A1_at, Bt.4627.1.S1_at, Bt.4646.1.S1_at,	1	0.985101	97.167
GOTERM_MF_ALL	GO:0015294~solute:cation symporter activity	4	0.0046	0.331851	Bt.11211.1.S1_at, Bt.557.1.S1_at, Bt.23659.1.S1_at, Bt.4793.1.S1_at, Bt.4793.1.S2_at, Bt.4627.1.S1_at,	1	0.998866	99.8961
GOTERM_MF_ALL	GO:0015291~secondary active transmembrane transporter activity	8	0.0092	0.366712	Bt.11211.1.S1_at, Bt.557.1.S1_at, Bt.23659.1.S1_at, Bt.4793.1.S1_at, Bt.4793.1.S2_at, Bt.21137.2.S1_at, Bt.21137.1.S1_at, Bt.759.1.S1_at, Bt.13537.1.A1_at, Bt.4627.1.S1_at, Bt.4646.1.S1_at,	1	0.999435	99.9583
SP_PIR_KEYWORDS	Symport	4	0.0046	0.369732	Bt.557.1.S1_at, Bt.23659.1.S1_at, Bt.21137.2.S1_at, Bt.21137.1.S1_at, Bt.13537.1.A1_at, Bt.4627.1.S1_at,	1	0.983223	99.9094
GOTERM_MF_ALL	GO:0015370~solute:sodium symporter activity	3	0.0034	0.557541	Bt.11211.1.S1_at, Bt.557.1.S1_at, Bt.23659.1.S1_at, Bt.4627.1.S1_at,	1	0.999988	99.9999
SP_PIR_KEYWORDS	sodium transport	3	0.0034	0.563105	Bt.11211.1.S1_at, Bt.21137.2.S1_at, Bt.21137.1.S1_at, Bt.4627.1.S1_at,	1	0.997285	99.9997
GOTERM_BP_ALL	GO:0006814~sodium ion transport	4	0.0046	0.703521	Bt.11211.1.S1_at, Bt.4793.1.S1_at, Bt.4793.1.S2_at, Bt.21137.2.S1_at, Bt.21137.1.S1_at, Bt.4627.1.S1_at,	1	0.999982	100
Functional Group 79	Median: 0.7730509437461335	Geo: 0.4227117515369714	Bt.5141.1.S1_at, Bt.5141.1.S2_at, Bt.869.1.S1_at, Bt.10078.2.S1_at, Bt.9136.1.S1_at, Bt.5711.1.S1_at, Bt.5434.1.S1_at, Bt.2582.1.S1_at, Bt.28224.1.A1_at, Bt.17280.1.S1_at,
Category	Term	Count	%	PValue	Genes	Bonferroni	Benjamini	FDR
KEGG_PATHWAY	bta00510:N-Glycan biosynthesis	6	0.0069	0.103916	Bt.5141.1.S1_at, Bt.5141.1.S2_at, Bt.869.1.S1_at, Bt.10078.2.S1_at, Bt.9136.1.S1_at, Bt.5711.1.S1_at, Bt.5434.1.S1_at,	1	0.993746	74.2739
GOTERM_MF_ALL	GO:0016758~transferase activity, transferring hexosyl groups	5	0.0057	0.773051	Bt.5141.1.S1_at, Bt.5141.1.S2_at, Bt.869.1.S1_at, Bt.2582.1.S1_at, Bt.28224.1.A1_at, Bt.5434.1.S1_at, Bt.17280.1.S1_at,	1	1	100
KEGG_PATHWAY	bta01030:Glycan structures - biosynthesis 1	6	0.0069	0.940252	Bt.5141.1.S1_at, Bt.5141.1.S2_at, Bt.10078.2.S1_at, Bt.9136.1.S1_at, Bt.5711.1.S1_at, Bt.2582.1.S1_at, Bt.28224.1.A1_at, Bt.5434.1.S1_at,	1	0.999745	100
Functional Group 80	Median: 0.45877645773717746	Geo: 0.4274304880473967	Bt.5141.1.S1_at, Bt.5141.1.S2_at, Bt.22840.1.S1_a_at, Bt.4775.1.S1_at, Bt.278.1.S1_at, Bt.1794.1.S1_a_at, Bt.2573.1.S1_at, Bt.4314.1.S1_at, Bt.4557.1.S1_at, Bt.2498.2.A1_a_at, Bt.9972.1.S1_at, Bt.6143.1.S1_at, Bt.247.1.S1_at, Bt.247.1.S2_at, Bt.4641.1.S1_at, Bt.2763.1.S1_at, Bt.571.1.S1_at, Bt.4802.1.S1_at, Bt.7780.1.S1_at, Bt.24181.1.S1_at,
Category	Term	Count	%	PValue	Genes	Bonferroni	Benjamini	FDR
GOTERM_BP_ALL	GO:0002526~acute inflammatory response	5	0.0057	0.26305	Bt.5141.1.S1_at, Bt.5141.1.S2_at, Bt.22840.1.S1_a_at, Bt.4775.1.S1_at, Bt.278.1.S1_at, Bt.1794.1.S1_a_at,	1	0.983403	99.6152
GOTERM_BP_ALL	GO:0009611~response to wounding	13	0.0149	0.277583	Bt.2573.1.S1_at, Bt.5141.1.S1_at, Bt.5141.1.S2_at, Bt.4314.1.S1_at, Bt.4557.1.S1_at, Bt.4775.1.S1_at, Bt.2498.2.A1_a_at, Bt.1794.1.S1_a_at, Bt.9972.1.S1_at, Bt.22840.1.S1_a_at, Bt.6143.1.S1_at, Bt.278.1.S1_at, Bt.247.1.S1_at, Bt.247.1.S2_at, Bt.4641.1.S1_at,	1	0.985918	99.7323
GOTERM_BP_ALL	GO:0006954~inflammatory response	8	0.0092	0.458776	Bt.5141.1.S1_at, Bt.5141.1.S2_at, Bt.22840.1.S1_a_at, Bt.9972.1.S1_at, Bt.6143.1.S1_at, Bt.4775.1.S1_at, Bt.278.1.S1_at, Bt.4641.1.S1_at, Bt.1794.1.S1_a_at,	1	0.998773	99.9986
GOTERM_BP_ALL	GO:0009605~response to external stimulus	14	0.016	0.484521	Bt.2573.1.S1_at, Bt.5141.1.S1_at, Bt.5141.1.S2_at, Bt.4314.1.S1_at, Bt.4557.1.S1_at, Bt.4775.1.S1_at, Bt.2498.2.A1_a_at, Bt.1794.1.S1_a_at, Bt.22840.1.S1_a_at, Bt.9972.1.S1_at, Bt.6143.1.S1_at, Bt.278.1.S1_at, Bt.2763.1.S1_at, Bt.247.1.S1_at, Bt.247.1.S2_at, Bt.4641.1.S1_at,	1	0.999208	99.9994
GOTERM_BP_ALL	GO:0006952~defense response	11	0.0126	0.878989	Bt.5141.1.S1_at, Bt.5141.1.S2_at, Bt.571.1.S1_at, Bt.22840.1.S1_a_at, Bt.9972.1.S1_at, Bt.6143.1.S1_at, Bt.4775.1.S1_at, Bt.4802.1.S1_at, Bt.7780.1.S1_at, Bt.278.1.S1_at, Bt.24181.1.S1_at, Bt.4641.1.S1_at, Bt.1794.1.S1_a_at,	1	1	100
Functional Group 81	Median: 0.4604409024637485	Geo: 0.4449550361639867	Bt.9153.1.S1_at, Bt.13134.1.A1_at, Bt.13134.1.S1_at, Bt.3091.1.S1_at, Bt.5657.1.A1_at, Bt.15267.1.A1_at, Bt.24579.1.S1_at, Bt.13220.1.S1_at, Bt.5150.1.S1_at, Bt.27417.2.S1_at, Bt.2899.1.S1_at, Bt.2899.1.S2_at, Bt.7648.1.S1_at, Bt.10880.1.S1_at,
Category	Term	Count	%	PValue	Genes	Bonferroni	Benjamini	FDR
GOTERM_CC_ALL	GO:0031981~nuclear lumen	11	0.0126	0.294565	Bt.9153.1.S1_at, Bt.13134.1.A1_at, Bt.13134.1.S1_at, Bt.3091.1.S1_at, Bt.5657.1.A1_at, Bt.15267.1.A1_at, Bt.24579.1.S1_at, Bt.13220.1.S1_at, Bt.5150.1.S1_at, Bt.27417.2.S1_at, Bt.2899.1.S1_at, Bt.2899.1.S2_at, Bt.7648.1.S1_at, Bt.10880.1.S1_at,	1	0.819874	99.3933
GOTERM_CC_ALL	GO:0005654~nucleoplasm	8	0.0092	0.401006	Bt.9153.1.S1_at, Bt.13134.1.A1_at, Bt.13134.1.S1_at, Bt.5657.1.A1_at, Bt.15267.1.A1_at, Bt.24579.1.S1_at, Bt.13220.1.S1_at, Bt.5150.1.S1_at, Bt.2899.1.S1_at, Bt.2899.1.S2_at, Bt.10880.1.S1_at,	1	0.904867	99.9446
GOTERM_CC_ALL	GO:0044451~nucleoplasm part	7	0.008	0.519876	Bt.9153.1.S1_at, Bt.13134.1.A1_at, Bt.13134.1.S1_at, Bt.5657.1.A1_at, Bt.15267.1.A1_at, Bt.24579.1.S1_at, Bt.13220.1.S1_at, Bt.2899.1.S1_at, Bt.2899.1.S2_at, Bt.10880.1.S1_at,	1	0.95552	99.9978
GOTERM_CC_ALL	GO:0005667~transcription factor complex	4	0.0046	0.638311	Bt.9153.1.S1_at, Bt.13134.1.A1_at, Bt.13134.1.S1_at, Bt.5657.1.A1_at, Bt.13220.1.S1_at, Bt.2899.1.S1_at, Bt.2899.1.S2_at,	1	0.983866	100
Functional Group 82	Median: 0.5419891339925231	Geo: 0.4454089034905836	Bt.2573.1.S1_at, Bt.7236.1.S1_at, Bt.234.1.S1_at, Bt.4775.1.S1_at, Bt.499.1.S1_a_at, Bt.2498.2.A1_a_at, Bt.4641.1.S1_at, Bt.983.1.S1_at,
Category	Term	Count	%	PValue	Genes	Bonferroni	Benjamini	FDR
GOTERM_BP_ALL	GO:0001775~cell activation	8	0.0092	0.156787	Bt.2573.1.S1_at, Bt.7236.1.S1_at, Bt.234.1.S1_at, Bt.4775.1.S1_at, Bt.499.1.S1_a_at, Bt.2498.2.A1_a_at, Bt.4641.1.S1_at, Bt.983.1.S1_at,	1	0.9365	95.5241
GOTERM_BP_ALL	GO:0046649~lymphocyte activation	5	0.0057	0.453146	Bt.7236.1.S1_at, Bt.234.1.S1_at, Bt.499.1.S1_a_at, Bt.4641.1.S1_at, Bt.983.1.S1_at,	1	0.998741	99.9983
GOTERM_BP_ALL	GO:0032943~mononuclear cell proliferation	3	0.0034	0.541989	Bt.234.1.S1_at, Bt.4641.1.S1_at, Bt.983.1.S1_at,	1	0.999656	99.9999
GOTERM_BP_ALL	GO:0046651~lymphocyte proliferation	3	0.0034	0.541989	Bt.234.1.S1_at, Bt.4641.1.S1_at, Bt.983.1.S1_at,	1	0.999656	99.9999
GOTERM_BP_ALL	GO:0045321~leukocyte activation	5	0.0057	0.543113	Bt.7236.1.S1_at, Bt.234.1.S1_at, Bt.499.1.S1_a_at, Bt.4641.1.S1_at, Bt.983.1.S1_at,	1	0.99964	99.9999
GOTERM_BP_ALL	GO:0042110~T cell activation	3	0.0034	0.688866	Bt.234.1.S1_at, Bt.499.1.S1_a_at, Bt.4641.1.S1_at,	1	0.999976	100
Functional Group 83	Median: 0.5007113645560508	Geo: 0.44764934332872086	Bt.19522.1.S1_at, Bt.4314.1.S1_at, Bt.28064.2.S1_at, Bt.9929.1.A1_at, Bt.868.1.S1_a_at, Bt.4691.1.S1_at,
Category	Term	Count	%	PValue	Genes	Bonferroni	Benjamini	FDR
GOTERM_CC_ALL	GO:0005768~endosome	5	0.0057	0.357799	Bt.19522.1.S1_at, Bt.4314.1.S1_at, Bt.28064.2.S1_at, Bt.9929.1.A1_at, Bt.868.1.S1_a_at, Bt.4691.1.S1_at,	1	0.875571	99.8464
GOTERM_CC_ALL	GO:0044440~endosomal part	3	0.0034	0.500711	Bt.19522.1.S1_at, Bt.868.1.S1_a_at, Bt.4691.1.S1_at,	1	0.949813	99.9961
GOTERM_CC_ALL	GO:0010008~endosome membrane	3	0.0034	0.500711	Bt.19522.1.S1_at, Bt.868.1.S1_a_at, Bt.4691.1.S1_at,	1	0.949813	99.9961
Functional Group 84	Median: 0.6031736208714803	Geo: 0.4484400935915222	Bt.1316.1.S1_at, Bt.1316.1.S2_at, Bt.5400.1.S1_at, Bt.13053.1.A1_at, Bt.6289.1.S1_at, Bt.20893.1.A1_at, Bt.22854.2.S1_at, Bt.5609.3.A1_a_at, Bt.5609.1.A1_a_at,
Category	Term	Count	%	PValue	Genes	Bonferroni	Benjamini	FDR
GOTERM_MF_ALL	GO:0016769~transferase activity, transferring nitrogenous groups	4	0.0046	0.209354	Bt.1316.1.S1_at, Bt.1316.1.S2_at, Bt.5400.1.S1_at, Bt.13053.1.A1_at, Bt.6289.1.S1_at,	1	0.990178	98.1721
SP_PIR_KEYWORDS	pyridoxal phosphate	5	0.0057	0.23266	Bt.1316.1.S1_at, Bt.1316.1.S2_at, Bt.5400.1.S1_at, Bt.20893.1.A1_at, Bt.6289.1.S1_at, Bt.22854.2.S1_at,	1	0.942872	98.2044
INTERPRO	IPR015421:Pyridoxal phosphate-dependent transferase, major region, subdomain 1	3	0.0034	0.603174	Bt.1316.1.S1_at, Bt.1316.1.S2_at, Bt.5400.1.S1_at, Bt.6289.1.S1_at,	1	1	100
GOTERM_MF_ALL	GO:0030170~pyridoxal phosphate binding	3	0.0034	0.731275	Bt.1316.1.S1_at, Bt.1316.1.S2_at, Bt.5400.1.S1_at, Bt.6289.1.S1_at,	1	1	100
GOTERM_MF_ALL	GO:0019842~vitamin binding	5	0.0057	0.844105	Bt.5609.3.A1_a_at, Bt.5609.1.A1_a_at, Bt.1316.1.S1_at, Bt.1316.1.S2_at, Bt.5400.1.S1_at, Bt.6289.1.S1_at, Bt.22854.2.S1_at,	1	1	100
Functional Group 85	Median: 0.503178534113589	Geo: 0.4492285476269436	Bt.2891.1.S1_at, Bt.11189.1.S1_at, Bt.21493.1.S1_at, Bt.5049.1.S1_at, Bt.4834.1.S1_at, Bt.9051.1.S1_at, Bt.4035.1.S1_at, Bt.10880.1.S1_at, Bt.26992.1.A1_at,
Category	Term	Count	%	PValue	Genes	Bonferroni	Benjamini	FDR
GOTERM_BP_ALL	GO:0006605~protein targeting	8	0.0092	0.174934	Bt.2891.1.S1_at, Bt.11189.1.S1_at, Bt.21493.1.S1_at, Bt.5049.1.S1_at, Bt.4834.1.S1_at, Bt.9051.1.S1_at, Bt.4035.1.S1_at, Bt.10880.1.S1_at,	1	0.950523	96.9887
GOTERM_BP_ALL	GO:0051170~nuclear import	3	0.0034	0.498486	Bt.21493.1.S1_at, Bt.5049.1.S1_at, Bt.4834.1.S1_at,	1	0.999367	99.9997
GOTERM_BP_ALL	GO:0006606~protein import into nucleus	3	0.0034	0.498486	Bt.21493.1.S1_at, Bt.5049.1.S1_at, Bt.4834.1.S1_at,	1	0.999367	99.9997
GOTERM_BP_ALL	GO:0051169~nuclear transport	4	0.0046	0.507871	Bt.21493.1.S1_at, Bt.26992.1.A1_at, Bt.5049.1.S1_at, Bt.4834.1.S1_at,	1	0.99939	99.9998
GOTERM_BP_ALL	GO:0006913~nucleocytoplasmic transport	4	0.0046	0.507871	Bt.21493.1.S1_at, Bt.26992.1.A1_at, Bt.5049.1.S1_at, Bt.4834.1.S1_at,	1	0.99939	99.9998
GOTERM_BP_ALL	GO:0017038~protein import	3	0.0034	0.733021	Bt.21493.1.S1_at, Bt.5049.1.S1_at, Bt.4834.1.S1_at,	1	0.99999	100
Functional Group 86	Median: 0.4077503112582472	Geo: 0.45407335916430486	Bt.11188.1.S1_at, Bt.12424.1.S1_at, Bt.4599.1.S1_at, Bt.8473.1.S1_at,
Category	Term	Count	%	PValue	Genes	Bonferroni	Benjamini	FDR
GOTERM_CC_ALL	GO:0042579~microbody	4	0.0046	0.40775	Bt.11188.1.S1_at, Bt.12424.1.S1_at, Bt.4599.1.S1_at, Bt.8473.1.S1_at,	1	0.90432	99.953
GOTERM_CC_ALL	GO:0005777~peroxisome	4	0.0046	0.40775	Bt.11188.1.S1_at, Bt.12424.1.S1_at, Bt.4599.1.S1_at, Bt.8473.1.S1_at,	1	0.90432	99.953
SP_PIR_KEYWORDS	peroxisome	3	0.0034	0.563105	Bt.11188.1.S1_at, Bt.12424.1.S1_at, Bt.4599.1.S1_at,	1	0.997285	99.9997
Functional Group 87	Median: 0.4931772006836159	Geo: 0.45513364900877	Bt.12094.1.S1_at, Bt.1767.1.S1_at, Bt.20602.1.S1_at, Bt.2136.1.S1_at, Bt.20361.2.A1_at, Bt.4689.1.S2_at, Bt.4859.1.S1_at, Bt.10146.1.S1_at, Bt.10146.2.S1_at, Bt.7911.1.S1_at, Bt.1552.1.S1_at, Bt.17036.1.A1_s_at, Bt.22532.2.S1_at, Bt.3892.1.S1_at, Bt.9756.1.S1_at, Bt.1815.3.S1_at, Bt.16068.1.A1_at, Bt.3350.2.S1_at, Bt.16725.2.A1_at, Bt.16132.2.S1_a_at,
Category	Term	Count	%	PValue	Genes	Bonferroni	Benjamini	FDR
SMART	SM00212:UBCc	4	0.0046	0.181634	Bt.12094.1.S1_at, Bt.1767.1.S1_at, Bt.20602.1.S1_at, Bt.2136.1.S1_at,	1	0.999881	94.4046
SP_PIR_KEYWORDS	Ubl conjugation pathway	9	0.0103	0.287167	Bt.20361.2.A1_at, Bt.4689.1.S2_at, Bt.4859.1.S1_at, Bt.12094.1.S1_at, Bt.1767.1.S1_at, Bt.10146.1.S1_at, Bt.10146.2.S1_at, Bt.20602.1.S1_at, Bt.2136.1.S1_at, Bt.7911.1.S1_at,	1	0.963752	99.4132
INTERPRO	IPR000608:Ubiquitin-conjugating enzyme, E2	4	0.0046	0.34725	Bt.12094.1.S1_at, Bt.1767.1.S1_at, Bt.20602.1.S1_at, Bt.2136.1.S1_at,	1	1	99.9582
SP_PIR_KEYWORDS	ligase	7	0.008	0.479317	Bt.1552.1.S1_at, Bt.17036.1.A1_s_at, Bt.12094.1.S1_at, Bt.1767.1.S1_at, Bt.10146.1.S1_at, Bt.10146.2.S1_at, Bt.22532.2.S1_at, Bt.20602.1.S1_at,	1	0.994245	99.995
GOTERM_MF_ALL	GO:0008639~small protein conjugating enzyme activity	5	0.0057	0.493177	Bt.3892.1.S1_at, Bt.12094.1.S1_at, Bt.1767.1.S1_at, Bt.20602.1.S1_at, Bt.2136.1.S1_at,	1	0.999964	99.9991
GOTERM_MF_ALL	GO:0004842~ubiquitin-protein ligase activity	5	0.0057	0.493177	Bt.3892.1.S1_at, Bt.12094.1.S1_at, Bt.1767.1.S1_at, Bt.20602.1.S1_at, Bt.2136.1.S1_at,	1	0.999964	99.9991
GOTERM_MF_ALL	GO:0016879~ligase activity, forming carbon-nitrogen bonds	8	0.0092	0.503053	Bt.3892.1.S1_at, Bt.12094.1.S1_at, Bt.1767.1.S1_at, Bt.9756.1.S1_at, Bt.1815.3.S1_at, Bt.16068.1.A1_at, Bt.20602.1.S1_at, Bt.2136.1.S1_at,	1	0.999965	99.9993
GOTERM_MF_ALL	GO:0016881~acid-amino acid ligase activity	6	0.0069	0.602135	Bt.3892.1.S1_at, Bt.12094.1.S1_at, Bt.1767.1.S1_at, Bt.16068.1.A1_at, Bt.20602.1.S1_at, Bt.2136.1.S1_at,	1	0.999996	100
GOTERM_MF_ALL	GO:0019787~small conjugating protein ligase activity	5	0.0057	0.610563	Bt.3892.1.S1_at, Bt.12094.1.S1_at, Bt.1767.1.S1_at, Bt.20602.1.S1_at, Bt.2136.1.S1_at,	1	0.999997	100
KEGG_PATHWAY	bta04120:Ubiquitin mediated proteolysis	7	0.008	0.976676	Bt.3892.1.S1_at, Bt.3350.2.S1_at, Bt.12094.1.S1_at, Bt.1767.1.S1_at, Bt.16725.2.A1_at, Bt.20602.1.S1_at, Bt.16132.2.S1_a_at,	1	0.999951	100
Functional Group 88	Median: 0.36671236871414764	Geo: 0.4630859957362014	Bt.557.1.S1_at, Bt.23659.1.S1_at, Bt.3960.2.S1_at, Bt.3960.1.S1_a_at, Bt.4793.1.S1_at, Bt.4793.1.S2_at, Bt.21137.2.S1_at, Bt.21137.1.S1_at, Bt.759.1.S1_at, Bt.4099.1.S1_at, Bt.11211.1.S1_at, Bt.13537.1.A1_at, Bt.4627.1.S1_at, Bt.4646.1.S1_at,
Category	Term	Count	%	PValue	Genes	Bonferroni	Benjamini	FDR
GOTERM_MF_ALL	GO:0008509~anion transmembrane transporter activity	6	0.0069	0.306741	Bt.557.1.S1_at, Bt.23659.1.S1_at, Bt.3960.2.S1_at, Bt.3960.1.S1_a_at, Bt.4793.1.S1_at, Bt.4793.1.S2_at, Bt.21137.2.S1_at, Bt.21137.1.S1_at, Bt.759.1.S1_at, Bt.4099.1.S1_at,	1	0.998118	99.8053
GOTERM_MF_ALL	GO:0015291~secondary active transmembrane transporter activity	8	0.0092	0.366712	Bt.11211.1.S1_at, Bt.557.1.S1_at, Bt.23659.1.S1_at, Bt.4793.1.S1_at, Bt.4793.1.S2_at, Bt.21137.2.S1_at, Bt.21137.1.S1_at, Bt.759.1.S1_at, Bt.13537.1.A1_at, Bt.4627.1.S1_at, Bt.4646.1.S1_at,	1	0.999435	99.9583
GOTERM_BP_ALL	GO:0006820~anion transport	6	0.0069	0.88285	Bt.3960.2.S1_at, Bt.3960.1.S1_a_at, Bt.4793.1.S1_at, Bt.4793.1.S2_at, Bt.21137.2.S1_at, Bt.21137.1.S1_at, Bt.759.1.S1_at, Bt.13537.1.A1_at, Bt.4099.1.S1_at,	1	1	100
Functional Group 89	Median: 0.5104901214499304	Geo: 0.46961870750087287	Bt.4748.1.S1_at, Bt.9153.1.S1_at, Bt.13134.1.A1_at, Bt.13134.1.S1_at, Bt.13220.1.S1_at, Bt.18808.1.S1_at, Bt.742.1.S2_at, Bt.4641.1.S1_at, Bt.5141.1.S1_at, Bt.5141.1.S2_at, Bt.234.1.S1_at, Bt.58.1.S1_at, Bt.4775.1.S1_at, Bt.1747.1.S1_at, Bt.1794.1.S1_a_at, Bt.6438.1.A1_at, Bt.4834.1.S1_at, Bt.8724.1.S1_at, Bt.2353.1.S1_at, Bt.983.1.S1_at, Bt.23179.1.S1_at, Bt.23179.1.S2_at,
Category	Term	Count	%	PValue	Genes	Bonferroni	Benjamini	FDR
GOTERM_BP_ALL	GO:0006357~regulation of transcription from RNA polymerase II promoter	6	0.0069	0.21916	Bt.4748.1.S1_at, Bt.9153.1.S1_at, Bt.13134.1.A1_at, Bt.13134.1.S1_at, Bt.13220.1.S1_at, Bt.18808.1.S1_at, Bt.742.1.S2_at, Bt.4641.1.S1_at,	1	0.973032	98.8961
GOTERM_BP_ALL	GO:0048522~positive regulation of cellular process	15	0.0172	0.393794	Bt.5141.1.S1_at, Bt.5141.1.S2_at, Bt.13220.1.S1_at, Bt.234.1.S1_at, Bt.58.1.S1_at, Bt.4775.1.S1_at, Bt.1747.1.S1_at, Bt.1794.1.S1_a_at, Bt.9153.1.S1_at, Bt.13134.1.A1_at, Bt.13134.1.S1_at, Bt.6438.1.A1_at, Bt.4834.1.S1_at, Bt.8724.1.S1_at, Bt.18808.1.S1_at, Bt.2353.1.S1_at, Bt.4641.1.S1_at, Bt.983.1.S1_at,	1	0.997056	99.989
GOTERM_BP_ALL	GO:0006366~transcription from RNA polymerase II promoter	6	0.0069	0.396071	Bt.4748.1.S1_at, Bt.9153.1.S1_at, Bt.13134.1.A1_at, Bt.13134.1.S1_at, Bt.13220.1.S1_at, Bt.18808.1.S1_at, Bt.742.1.S2_at, Bt.4641.1.S1_at,	1	0.997124	99.9898
GOTERM_BP_ALL	GO:0045941~positive regulation of transcription	5	0.0057	0.498995	Bt.9153.1.S1_at, Bt.13134.1.A1_at, Bt.13134.1.S1_at, Bt.4834.1.S1_at, Bt.13220.1.S1_at, Bt.1747.1.S1_at, Bt.4641.1.S1_at,	1	0.999329	99.9997
GOTERM_BP_ALL	GO:0009893~positive regulation of metabolic process	7	0.008	0.51049	Bt.23179.1.S1_at, Bt.23179.1.S2_at, Bt.9153.1.S1_at, Bt.13134.1.A1_at, Bt.13134.1.S1_at, Bt.4834.1.S1_at, Bt.13220.1.S1_at, Bt.1747.1.S1_at, Bt.4641.1.S1_at, Bt.983.1.S1_at,	1	0.999395	99.9998
GOTERM_BP_ALL	GO:0045935~positive regulation of nucleobase, nucleoside, nucleotide and nucleic acid metabolic process	5	0.0057	0.543113	Bt.9153.1.S1_at, Bt.13134.1.A1_at, Bt.13134.1.S1_at, Bt.4834.1.S1_at, Bt.13220.1.S1_at, Bt.1747.1.S1_at, Bt.4641.1.S1_at,	1	0.99964	99.9999
GOTERM_BP_ALL	GO:0045944~positive regulation of transcription from RNA polymerase II promoter	3	0.0034	0.562737	Bt.9153.1.S1_at, Bt.13134.1.A1_at, Bt.13134.1.S1_at, Bt.13220.1.S1_at, Bt.4641.1.S1_at,	1	0.999744	100
GOTERM_BP_ALL	GO:0031325~positive regulation of cellular metabolic process	6	0.0069	0.606025	Bt.9153.1.S1_at, Bt.13134.1.A1_at, Bt.13134.1.S1_at, Bt.4834.1.S1_at, Bt.13220.1.S1_at, Bt.1747.1.S1_at, Bt.4641.1.S1_at, Bt.983.1.S1_at,	1	0.999879	100
GOTERM_BP_ALL	GO:0045893~positive regulation of transcription, DNA-dependent	3	0.0034	0.688866	Bt.9153.1.S1_at, Bt.13134.1.A1_at, Bt.13134.1.S1_at, Bt.13220.1.S1_at, Bt.4641.1.S1_at,	1	0.999976	100
Functional Group 90	Median: 0.5704315699675382	Geo: 0.4713062724414664	Bt.20137.2.S1_at, Bt.2981.1.S1_at, Bt.22522.1.S1_at, Bt.5754.3.S1_at, Bt.3382.1.S1_at, Bt.22440.1.S1_at, Bt.1404.2.S1_at, Bt.1404.1.S1_at, Bt.1404.3.A1_at, Bt.11050.2.S1_at,
Category	Term	Count	%	PValue	Genes	Bonferroni	Benjamini	FDR
SMART	SM00320:WD40	7	0.008	0.271045	Bt.20137.2.S1_at, Bt.2981.1.S1_at, Bt.22522.1.S1_at, Bt.5754.3.S1_at, Bt.3382.1.S1_at, Bt.22440.1.S1_at, Bt.1404.2.S1_at, Bt.1404.1.S1_at, Bt.1404.3.A1_at, Bt.11050.2.S1_at,	1	0.999986	98.9406
INTERPRO	IPR001680:WD40 repeat	7	0.008	0.570432	Bt.20137.2.S1_at, Bt.2981.1.S1_at, Bt.22522.1.S1_at, Bt.5754.3.S1_at, Bt.3382.1.S1_at, Bt.22440.1.S1_at, Bt.1404.2.S1_at, Bt.1404.1.S1_at, Bt.1404.3.A1_at, Bt.11050.2.S1_at,	1	1	100
SP_PIR_KEYWORDS	wd repeat	6	0.0069	0.677119	Bt.20137.2.S1_at, Bt.2981.1.S1_at, Bt.22522.1.S1_at, Bt.5754.3.S1_at, Bt.3382.1.S1_at, Bt.22440.1.S1_at, Bt.11050.2.S1_at,	1	0.999272	100
Functional Group 91	Median: 0.4835499776520318	Geo: 0.4768242500643448	Bt.26810.1.S1_at, Bt.3583.1.S1_at, Bt.28699.1.S1_at, Bt.2441.1.S1_at, Bt.16985.1.S1_at, Bt.177.1.S1_at, Bt.11739.2.A1_a_at, Bt.11739.1.S1_a_at,
Category	Term	Count	%	PValue	Genes	Bonferroni	Benjamini	FDR
INTERPRO	IPR011993:Pleckstrin homology-type	7	0.008	0.331127	Bt.26810.1.S1_at, Bt.3583.1.S1_at, Bt.28699.1.S1_at, Bt.2441.1.S1_at, Bt.16985.1.S1_at, Bt.177.1.S1_at, Bt.11739.2.A1_a_at, Bt.11739.1.S1_a_at,	1	1	99.9348
SMART	SM00233:PH	4	0.0046	0.48355	Bt.2441.1.S1_at, Bt.16985.1.S1_at, Bt.177.1.S1_at, Bt.11739.2.A1_a_at, Bt.11739.1.S1_a_at,	1	1	99.9926
INTERPRO	IPR001849:Pleckstrin-like	4	0.0046	0.677078	Bt.2441.1.S1_at, Bt.16985.1.S1_at, Bt.177.1.S1_at, Bt.11739.2.A1_a_at, Bt.11739.1.S1_a_at,	1	1	100
Functional Group 92	Median: 0.6319059463382181	Geo: 0.4835834620178435	Bt.8131.1.S1_at, Bt.4768.1.S2_at, Bt.4695.1.S1_at, Bt.4679.1.S1_at, Bt.13744.1.A1_at, Bt.4943.3.S1_a_at, Bt.3806.1.A1_at, Bt.5269.1.S1_at, Bt.5269.2.S1_at, Bt.2626.1.S1_at, Bt.22487.1.S1_at, Bt.22487.2.A1_a_at, Bt.22487.2.A1_at, Bt.4762.1.S1_at, Bt.29696.1.A1_at, Bt.29696.1.S1_at, Bt.21540.1.S1_at,
Category	Term	Count	%	PValue	Genes	Bonferroni	Benjamini	FDR
UP_SEQ_FEATURE	domain:Ig-like V-type 2	3	0.0034	0.070691	Bt.8131.1.S1_at, Bt.4768.1.S2_at, Bt.4695.1.S1_at,	1	1	73.8789
UP_SEQ_FEATURE	domain:Ig-like V-type 1	3	0.0034	0.070691	Bt.8131.1.S1_at, Bt.4768.1.S2_at, Bt.4695.1.S1_at,	1	1	73.8789
UP_SEQ_FEATURE	domain:Ig-like C2-type 1	3	0.0034	0.543411	Bt.4679.1.S1_at, Bt.13744.1.A1_at, Bt.8131.1.S1_at,	1	1	99.9999
UP_SEQ_FEATURE	domain:Ig-like C2-type 2	3	0.0034	0.543411	Bt.4679.1.S1_at, Bt.13744.1.A1_at, Bt.8131.1.S1_at,	1	1	99.9999
SMART	SM00409:IG	7	0.008	0.592677	Bt.4943.3.S1_a_at, Bt.4679.1.S1_at, Bt.3806.1.A1_at, Bt.13744.1.A1_at, Bt.8131.1.S1_at, Bt.4768.1.S2_at, Bt.4695.1.S1_at,	1	1	99.9998
SP_PIR_KEYWORDS	immunoglobulin domain	7	0.008	0.626852	Bt.5269.1.S1_at, Bt.5269.2.S1_at, Bt.4679.1.S1_at, Bt.2626.1.S1_at, Bt.13744.1.A1_at, Bt.8131.1.S1_at, Bt.4768.1.S2_at, Bt.4695.1.S1_at,	1	0.998358	100
INTERPRO	IPR003599:Immunoglobulin subtype	6	0.0069	0.63696	Bt.4943.3.S1_a_at, Bt.4679.1.S1_at, Bt.13744.1.A1_at, Bt.8131.1.S1_at, Bt.4768.1.S2_at, Bt.4695.1.S1_at,	1	1	100
SMART	SM00406:IGv	3	0.0034	0.727475	Bt.4943.3.S1_a_at, Bt.13744.1.A1_at, Bt.4695.1.S1_at,	1	1	100
INTERPRO	IPR013106:Immunoglobulin V-set	4	0.0046	0.803558	Bt.4943.3.S1_a_at, Bt.13744.1.A1_at, Bt.4768.1.S2_at, Bt.4695.1.S1_at,	1	1	100
INTERPRO	IPR013151:Immunoglobulin	4	0.0046	0.831023	Bt.4679.1.S1_at, Bt.8131.1.S1_at, Bt.4768.1.S2_at, Bt.4695.1.S1_at,	1	1	100
INTERPRO	IPR007110:Immunoglobulin-like	10	0.0115	0.972229	Bt.5269.1.S1_at, Bt.5269.2.S1_at, Bt.4943.3.S1_a_at, Bt.4679.1.S1_at, Bt.2626.1.S1_at, Bt.22487.1.S1_at, Bt.22487.2.A1_a_at, Bt.22487.2.A1_at, Bt.13744.1.A1_at, Bt.8131.1.S1_at, Bt.4762.1.S1_at, Bt.4768.1.S2_at, Bt.4695.1.S1_at,	1	1	100
INTERPRO	IPR013783:Immunoglobulin-like fold	10	0.0115	0.991657	Bt.5269.1.S1_at, Bt.5269.2.S1_at, Bt.4943.3.S1_a_at, Bt.4679.1.S1_at, Bt.22487.1.S1_at, Bt.22487.2.A1_a_at, Bt.22487.2.A1_at, Bt.13744.1.A1_at, Bt.29696.1.A1_at, Bt.29696.1.S1_at, Bt.21540.1.S1_at, Bt.8131.1.S1_at, Bt.4762.1.S1_at, Bt.4768.1.S2_at, Bt.4695.1.S1_at,	1	1	100
Functional Group 93	Median: 0.6698505295595781	Geo: 0.48393355611096484	Bt.1417.1.S1_at, Bt.21503.1.S1_at, Bt.20931.1.S1_at, Bt.21201.1.S1_at, Bt.26339.1.A1_at, Bt.4153.2.S1_a_at, Bt.9240.1.A1_at, Bt.5590.1.S1_at, Bt.10880.1.S1_at, Bt.24627.2.A1_a_at, Bt.5197.2.S1_at, Bt.1302.1.S1_at, Bt.13886.2.S1_at, Bt.5517.1.S2_at, Bt.22854.2.S1_at, Bt.23098.2.S1_at, Bt.21875.1.S1_at, Bt.21986.1.A1_at, Bt.4689.1.S2_at, Bt.21721.1.A1_at, Bt.5963.1.S1_at, Bt.29830.1.A1_at,
Category	Term	Count	%	PValue	Genes	Bonferroni	Benjamini	FDR
SP_PIR_KEYWORDS	protein phosphatase	4	0.0046	0.158846	Bt.1417.1.S1_at, Bt.21503.1.S1_at, Bt.20931.1.S1_at, Bt.21201.1.S1_at,	1	0.892529	92.761
GOTERM_MF_ALL	GO:0004721~phosphoprotein phosphatase activity	9	0.0103	0.210866	Bt.1417.1.S1_at, Bt.21503.1.S1_at, Bt.20931.1.S1_at, Bt.26339.1.A1_at, Bt.4153.2.S1_a_at, Bt.9240.1.A1_at, Bt.21201.1.S1_at, Bt.5590.1.S1_at, Bt.10880.1.S1_at,	1	0.990065	98.2307
GOTERM_BP_ALL	GO:0006470~protein amino acid dephosphorylation	6	0.0069	0.45144	Bt.1417.1.S1_at, Bt.26339.1.A1_at, Bt.4153.2.S1_a_at, Bt.21201.1.S1_at, Bt.5590.1.S1_at, Bt.10880.1.S1_at,	1	0.998835	99.9982
GOTERM_BP_ALL	GO:0016311~dephosphorylation	6	0.0069	0.640602	Bt.1417.1.S1_at, Bt.26339.1.A1_at, Bt.4153.2.S1_a_at, Bt.21201.1.S1_at, Bt.5590.1.S1_at, Bt.10880.1.S1_at,	1	0.999939	100
GOTERM_MF_ALL	GO:0004725~protein tyrosine phosphatase activity	4	0.0046	0.699099	Bt.1417.1.S1_at, Bt.26339.1.A1_at, Bt.5590.1.S1_at, Bt.10880.1.S1_at,	1	1	100
GOTERM_MF_ALL	GO:0016791~phosphoric monoester hydrolase activity	9	0.0103	0.716556	Bt.1417.1.S1_at, Bt.21503.1.S1_at, Bt.20931.1.S1_at, Bt.26339.1.A1_at, Bt.4153.2.S1_a_at, Bt.9240.1.A1_at, Bt.21201.1.S1_at, Bt.5590.1.S1_at, Bt.10880.1.S1_at,	1	1	100
GOTERM_MF_ALL	GO:0016788~hydrolase activity, acting on ester bonds	22	0.0252	0.774343	Bt.24627.2.A1_a_at, Bt.5197.2.S1_at, Bt.1302.1.S1_at, Bt.13886.2.S1_at, Bt.26339.1.A1_at, Bt.4153.2.S1_a_at, Bt.5517.1.S2_at, Bt.22854.2.S1_at, Bt.23098.2.S1_at, Bt.21875.1.S1_at, Bt.21986.1.A1_at, Bt.4689.1.S2_at, Bt.1417.1.S1_at, Bt.21503.1.S1_at, Bt.20931.1.S1_at, Bt.21721.1.A1_at, Bt.5963.1.S1_at, Bt.29830.1.A1_at, Bt.9240.1.A1_at, Bt.21201.1.S1_at, Bt.5590.1.S1_at, Bt.10880.1.S1_at,	1	1	100
GOTERM_MF_ALL	GO:0042578~phosphoric ester hydrolase activity	11	0.0126	0.800559	Bt.1417.1.S1_at, Bt.21503.1.S1_at, Bt.20931.1.S1_at, Bt.1302.1.S1_at, Bt.26339.1.A1_at, Bt.4153.2.S1_a_at, Bt.5517.1.S2_at, Bt.9240.1.A1_at, Bt.21201.1.S1_at, Bt.5590.1.S1_at, Bt.10880.1.S1_at,	1	1	100
Functional Group 94	Median: 0.62151685695075	Geo: 0.49473437167422557	Bt.21503.1.S1_at, Bt.8482.1.A1_at, Bt.20931.1.S1_at, Bt.9026.1.S1_at, Bt.12896.1.S1_at, Bt.23589.3.A1_a_at, Bt.7343.1.A1_at, Bt.1214.1.S1_at, Bt.212.1.S1_at, Bt.9153.1.S1_at, Bt.13134.1.A1_at, Bt.13134.1.S1_at, Bt.800.1.S1_at, Bt.20852.1.A1_at, Bt.8479.1.A1_at, Bt.7236.1.S1_at, Bt.2.1.S1_at,
Category	Term	Count	%	PValue	Genes	Bonferroni	Benjamini	FDR
KEGG_PATHWAY	bta04720:Long-term potentiation	7	0.008	0.162403	Bt.21503.1.S1_at, Bt.8482.1.A1_at, Bt.20931.1.S1_at, Bt.9026.1.S1_at, Bt.12896.1.S1_at, Bt.23589.3.A1_a_at, Bt.7343.1.A1_at, Bt.1214.1.S1_at, Bt.212.1.S1_at,	1	0.973822	88.8404
KEGG_PATHWAY	bta04912:GnRH signaling pathway	7	0.008	0.510487	Bt.9153.1.S1_at, Bt.13134.1.A1_at, Bt.13134.1.S1_at, Bt.8482.1.A1_at, Bt.800.1.S1_at, Bt.9026.1.S1_at, Bt.12896.1.S1_at, Bt.23589.3.A1_a_at, Bt.7343.1.A1_at, Bt.1214.1.S1_at, Bt.20852.1.A1_at,	1	0.996804	99.9855
KEGG_PATHWAY	bta04730:Long-term depression	5	0.0057	0.621517	Bt.8479.1.A1_at, Bt.8482.1.A1_at, Bt.9026.1.S1_at, Bt.23589.3.A1_a_at, Bt.7343.1.A1_at, Bt.1214.1.S1_at, Bt.20852.1.A1_at,	1	0.993214	99.9994
KEGG_PATHWAY	bta04070:Phosphatidylinositol signaling system	4	0.0046	0.642649	Bt.7236.1.S1_at, Bt.9026.1.S1_at, Bt.12896.1.S1_at, Bt.23589.3.A1_a_at, Bt.7343.1.A1_at, Bt.1214.1.S1_at,	1	0.991428	99.9997
KEGG_PATHWAY	bta04540:Gap junction	5	0.0057	0.895064	Bt.8482.1.A1_at, Bt.9026.1.S1_at, Bt.23589.3.A1_a_at, Bt.7343.1.A1_at, Bt.1214.1.S1_at, Bt.2.1.S1_at, Bt.20852.1.A1_at,	1	0.999246	100
Functional Group 95	Median: 0.7042147552271638	Geo: 0.528784872547998	Bt.5218.1.S1_at, Bt.1792.1.S1_at, Bt.6143.1.S1_at, Bt.29570.1.S1_at, Bt.5885.1.S1_at, Bt.4798.1.S2_at, Bt.22854.2.S1_at, Bt.4599.1.S1_at,
Category	Term	Count	%	PValue	Genes	Bonferroni	Benjamini	FDR
GOTERM_BP_ALL	GO:0006631~fatty acid metabolic process	8	0.0092	0.223872	Bt.5218.1.S1_at, Bt.1792.1.S1_at, Bt.6143.1.S1_at, Bt.29570.1.S1_at, Bt.5885.1.S1_at, Bt.4798.1.S2_at, Bt.22854.2.S1_at, Bt.4599.1.S1_at,	1	0.974507	99.0114
GOTERM_BP_ALL	GO:0006633~fatty acid biosynthetic process	3	0.0034	0.704215	Bt.6143.1.S1_at, Bt.4798.1.S2_at, Bt.22854.2.S1_at,	1	0.999982	100
GOTERM_BP_ALL	GO:0046394~carboxylic acid biosynthetic process	3	0.0034	0.704215	Bt.6143.1.S1_at, Bt.4798.1.S2_at, Bt.22854.2.S1_at,	1	0.999982	100
GOTERM_BP_ALL	GO:0016053~organic acid biosynthetic process	3	0.0034	0.704215	Bt.6143.1.S1_at, Bt.4798.1.S2_at, Bt.22854.2.S1_at,	1	0.999982	100
Functional Group 96	Median: 0.5742208614062181	Geo: 0.5429823774909109	Bt.21503.1.S1_at, Bt.19650.1.A1_at, Bt.20931.1.S1_at, Bt.2.1.S1_at, Bt.9603.1.A1_at, Bt.9603.2.S1_at, Bt.21444.1.S1_at, Bt.8482.1.A1_at, Bt.11171.1.S1_at, Bt.9633.1.S1_at, Bt.6465.1.S1_at,
Category	Term	Count	%	PValue	Genes	Bonferroni	Benjamini	FDR
SP_PIR_KEYWORDS	cell division	6	0.0069	0.393685	Bt.21503.1.S1_at, Bt.19650.1.A1_at, Bt.20931.1.S1_at, Bt.2.1.S1_at, Bt.9603.1.A1_at, Bt.9603.2.S1_at, Bt.21444.1.S1_at,	1	0.985406	99.9497
SP_PIR_KEYWORDS	cell cycle	7	0.008	0.574221	Bt.21503.1.S1_at, Bt.8482.1.A1_at, Bt.20931.1.S1_at, Bt.2.1.S1_at, Bt.11171.1.S1_at, Bt.9603.1.A1_at, Bt.9603.2.S1_at, Bt.21444.1.S1_at,	1	0.997163	99.9998
KEGG_PATHWAY	bta04115:p53 signaling pathway	5	0.0057	0.708156	Bt.9633.1.S1_at, Bt.6465.1.S1_at, Bt.2.1.S1_at, Bt.9603.1.A1_at, Bt.9603.2.S1_at, Bt.21444.1.S1_at,	1	0.994361	100
Functional Group 97	Median: 0.5546781054979202	Geo: 0.545306281437875	Bt.6438.1.A1_at, Bt.5141.1.S1_at, Bt.5141.1.S2_at, Bt.8724.1.S1_at, Bt.4775.1.S1_at, Bt.1747.1.S1_at,
Category	Term	Count	%	PValue	Genes	Bonferroni	Benjamini	FDR
GOTERM_BP_ALL	GO:0043068~positive regulation of programmed cell death	5	0.0057	0.453146	Bt.6438.1.A1_at, Bt.5141.1.S1_at, Bt.5141.1.S2_at, Bt.8724.1.S1_at, Bt.4775.1.S1_at, Bt.1747.1.S1_at,	1	0.998741	99.9983
GOTERM_BP_ALL	GO:0043065~positive regulation of apoptosis	5	0.0057	0.453146	Bt.6438.1.A1_at, Bt.5141.1.S1_at, Bt.5141.1.S2_at, Bt.8724.1.S1_at, Bt.4775.1.S1_at, Bt.1747.1.S1_at,	1	0.998741	99.9983
GOTERM_BP_ALL	GO:0012502~induction of programmed cell death	3	0.0034	0.656211	Bt.8724.1.S1_at, Bt.4775.1.S1_at, Bt.1747.1.S1_at,	1	0.999954	100
GOTERM_BP_ALL	GO:0006917~induction of apoptosis	3	0.0034	0.656211	Bt.8724.1.S1_at, Bt.4775.1.S1_at, Bt.1747.1.S1_at,	1	0.999954	100
Functional Group 98	Median: 0.6103231159482712	Geo: 0.5712853821222987	Bt.4697.1.S1_at, Bt.177.1.S1_at, Bt.23028.1.S1_at, Bt.499.1.S1_a_at, Bt.21170.1.A1_at, Bt.2575.1.S1_at, Bt.3050.1.S1_at, Bt.28699.1.S1_at, Bt.4549.1.S1_at,
Category	Term	Count	%	PValue	Genes	Bonferroni	Benjamini	FDR
SP_PIR_KEYWORDS	gtpase activation	3	0.0034	0.337404	Bt.4697.1.S1_at, Bt.177.1.S1_at, Bt.23028.1.S1_at,	1	0.978276	99.8065
GOTERM_MF_ALL	GO:0008047~enzyme activator activity	6	0.0069	0.521547	Bt.4697.1.S1_at, Bt.499.1.S1_a_at, Bt.21170.1.A1_at, Bt.177.1.S1_at, Bt.23028.1.S1_at, Bt.2575.1.S1_at,	1	0.999974	99.9996
GOTERM_MF_ALL	GO:0005096~GTPase activator activity	4	0.0046	0.699099	Bt.4697.1.S1_at, Bt.21170.1.A1_at, Bt.177.1.S1_at, Bt.23028.1.S1_at,	1	1	100
GOTERM_MF_ALL	GO:0030695~GTPase regulator activity	7	0.008	0.865826	Bt.3050.1.S1_at, Bt.4697.1.S1_at, Bt.28699.1.S1_at, Bt.21170.1.A1_at, Bt.177.1.S1_at, Bt.23028.1.S1_at, Bt.4549.1.S1_at,	1	1	100
Functional Group 99	Median: 0.6142706770170936	Geo: 0.5869165951369217	Bt.4816.1.S1_at, Bt.4834.1.S1_at, Bt.1302.1.S1_at, Bt.13220.1.S1_at, Bt.2353.1.S1_at, Bt.499.1.S1_a_at, Bt.4476.1.S1_at, Bt.868.1.S1_a_at, Bt.19517.1.S1_at, Bt.504.1.S1_at, Bt.28686.2.S1_at, Bt.23028.1.S1_at, Bt.4641.1.S1_at,
Category	Term	Count	%	PValue	Genes	Bonferroni	Benjamini	FDR
GOTERM_BP_ALL	GO:0065009~regulation of a molecular function	12	0.0137	0.297324	Bt.4816.1.S1_at, Bt.4834.1.S1_at, Bt.1302.1.S1_at, Bt.13220.1.S1_at, Bt.2353.1.S1_at, Bt.499.1.S1_a_at, Bt.4476.1.S1_at, Bt.868.1.S1_a_at, Bt.19517.1.S1_at, Bt.504.1.S1_at, Bt.28686.2.S1_at, Bt.23028.1.S1_at,	1	0.989104	99.8384
GOTERM_BP_ALL	GO:0032147~activation of protein kinase activity	3	0.0034	0.35373	Bt.4834.1.S1_at, Bt.499.1.S1_a_at, Bt.868.1.S1_a_at,	1	0.994641	99.9648
GOTERM_BP_ALL	GO:0045860~positive regulation of protein kinase activity	3	0.0034	0.520567	Bt.4834.1.S1_at, Bt.499.1.S1_a_at, Bt.868.1.S1_a_at,	1	0.999501	99.9998
GOTERM_BP_ALL	GO:0051347~positive regulation of transferase activity	3	0.0034	0.562737	Bt.4834.1.S1_at, Bt.499.1.S1_a_at, Bt.868.1.S1_a_at,	1	0.999744	100
GOTERM_BP_ALL	GO:0033674~positive regulation of kinase activity	3	0.0034	0.562737	Bt.4834.1.S1_at, Bt.499.1.S1_a_at, Bt.868.1.S1_a_at,	1	0.999744	100
GOTERM_BP_ALL	GO:0050790~regulation of catalytic activity	9	0.0103	0.57858	Bt.4816.1.S1_at, Bt.4834.1.S1_at, Bt.2353.1.S1_at, Bt.499.1.S1_a_at, Bt.868.1.S1_a_at, Bt.19517.1.S1_at, Bt.504.1.S1_at, Bt.28686.2.S1_at, Bt.23028.1.S1_at,	1	0.999804	100
GOTERM_BP_ALL	GO:0051336~regulation of hydrolase activity	5	0.0057	0.649961	Bt.4816.1.S1_at, Bt.2353.1.S1_at, Bt.19517.1.S1_at, Bt.504.1.S1_at, Bt.23028.1.S1_at,	1	0.99995	100
GOTERM_BP_ALL	GO:0043085~positive regulation of catalytic activity	4	0.0046	0.69085	Bt.4834.1.S1_at, Bt.499.1.S1_a_at, Bt.868.1.S1_a_at, Bt.504.1.S1_at,	1	0.999975	100
GOTERM_BP_ALL	GO:0007243~protein kinase cascade	4	0.0046	0.760963	Bt.4834.1.S1_at, Bt.499.1.S1_a_at, Bt.868.1.S1_a_at, Bt.4641.1.S1_at,	1	0.999995	100
GOTERM_BP_ALL	GO:0045859~regulation of protein kinase activity	3	0.0034	0.771736	Bt.4834.1.S1_at, Bt.499.1.S1_a_at, Bt.868.1.S1_a_at,	1	0.999996	100
GOTERM_BP_ALL	GO:0051338~regulation of transferase activity	3	0.0034	0.794747	Bt.4834.1.S1_at, Bt.499.1.S1_a_at, Bt.868.1.S1_a_at,	1	0.999998	100
GOTERM_BP_ALL	GO:0043549~regulation of kinase activity	3	0.0034	0.794747	Bt.4834.1.S1_at, Bt.499.1.S1_a_at, Bt.868.1.S1_a_at,	1	0.999998	100
Functional Group 100	Median: 0.6079542583456492	Geo: 0.6022135084785757	Bt.4360.1.S1_at, Bt.265.1.S1_at, Bt.13170.1.S1_at, Bt.5033.1.S1_at, Bt.5134.1.S1_at, Bt.4434.1.A1_at, Bt.621.1.S1_at, Bt.9826.1.S1_at, Bt.16514.2.A1_s_at,
Category	Term	Count	%	PValue	Genes	Bonferroni	Benjamini	FDR
SP_PIR_KEYWORDS	electron transport	5	0.0057	0.485586	Bt.4360.1.S1_at, Bt.265.1.S1_at, Bt.13170.1.S1_at, Bt.5033.1.S1_at, Bt.5134.1.S1_at, Bt.4434.1.A1_at,	1	0.99447	99.9959
UP_SEQ_FEATURE	metal ion-binding site:Iron (heme axial ligand)	4	0.0046	0.607954	Bt.4360.1.S1_at, Bt.13170.1.S1_at, Bt.5134.1.S1_at, Bt.4434.1.A1_at, Bt.621.1.S1_at,	1	1	100
SP_PIR_KEYWORDS	heme	6	0.0069	0.7398	Bt.4360.1.S1_at, Bt.13170.1.S1_at, Bt.9826.1.S1_at, Bt.5134.1.S1_at, Bt.4434.1.A1_at, Bt.16514.2.A1_s_at, Bt.621.1.S1_at,	1	0.999719	100
Functional Group 101	Median: 0.6636299714482925	Geo: 0.6174832209804951	Bt.7236.1.S1_at, Bt.5478.1.S1_at, Bt.177.1.S1_at, Bt.5323.1.S1_at,
Category	Term	Count	%	PValue	Genes	Bonferroni	Benjamini	FDR
UP_SEQ_FEATURE	domain:SH3	3	0.0034	0.422669	Bt.7236.1.S1_at, Bt.5478.1.S1_at, Bt.177.1.S1_at,	1	1	99.9957
SMART	SM00326:SH3	4	0.0046	0.599002	Bt.7236.1.S1_at, Bt.5478.1.S1_at, Bt.5323.1.S1_at, Bt.177.1.S1_at,	1	1	99.9998
SP_PIR_KEYWORDS	SH3 domain	4	0.0046	0.728258	Bt.7236.1.S1_at, Bt.5478.1.S1_at, Bt.5323.1.S1_at, Bt.177.1.S1_at,	1	0.999701	100
INTERPRO	IPR001452:Src homology-3	4	0.0046	0.788474	Bt.7236.1.S1_at, Bt.5478.1.S1_at, Bt.5323.1.S1_at, Bt.177.1.S1_at,	1	1	100
Functional Group 102	Median: 0.6906145311734333	Geo: 0.6289108543486048	Bt.4896.2.S1_at, Bt.6143.1.S1_at, Bt.21675.1.S1_at, Bt.2110.1.S1_at,
Category	Term	Count	%	PValue	Genes	Bonferroni	Benjamini	FDR
GOTERM_MF_ALL	GO:0004177~aminopeptidase activity	3	0.0034	0.455797	Bt.4896.2.S1_at, Bt.6143.1.S1_at, Bt.21675.1.S1_at,	1	0.999909	99.9969
GOTERM_MF_ALL	GO:0008235~metalloexopeptidase activity	3	0.0034	0.690615	Bt.4896.2.S1_at, Bt.6143.1.S1_at, Bt.21675.1.S1_at,	1	1	100
GOTERM_MF_ALL	GO:0008238~exopeptidase activity	4	0.0046	0.790241	Bt.4896.2.S1_at, Bt.2110.1.S1_at, Bt.6143.1.S1_at, Bt.21675.1.S1_at,	1	1	100
Functional Group 103	Median: 0.7724977119995982	Geo: 0.6301548953677945	Bt.224.1.S1_at, Bt.2573.1.S1_at, Bt.15436.2.S1_a_at, Bt.15436.1.S1_s_at, Bt.5141.1.S1_at, Bt.5141.1.S2_at, Bt.22840.1.S1_a_at, Bt.2712.1.S1_at, Bt.9889.1.S1_at, Bt.28119.1.S1_at,
Category	Term	Count	%	PValue	Genes	Bonferroni	Benjamini	FDR
GOTERM_BP_ALL	GO:0019953~sexual reproduction	8	0.0092	0.332756	Bt.224.1.S1_at, Bt.2573.1.S1_at, Bt.15436.2.S1_a_at, Bt.15436.1.S1_s_at, Bt.5141.1.S1_at, Bt.5141.1.S2_at, Bt.22840.1.S1_a_at, Bt.2712.1.S1_at, Bt.9889.1.S1_at, Bt.28119.1.S1_at,	1	0.992811	99.937
GOTERM_BP_ALL	GO:0007276~gamete generation	4	0.0046	0.750248	Bt.15436.2.S1_a_at, Bt.15436.1.S1_s_at, Bt.2712.1.S1_at, Bt.9889.1.S1_at, Bt.28119.1.S1_at,	1	0.999993	100
GOTERM_BP_ALL	GO:0048232~male gamete generation	3	0.0034	0.794747	Bt.15436.2.S1_a_at, Bt.15436.1.S1_s_at, Bt.2712.1.S1_at, Bt.28119.1.S1_at,	1	0.999998	100
GOTERM_BP_ALL	GO:0007283~spermatogenesis	3	0.0034	0.794747	Bt.15436.2.S1_a_at, Bt.15436.1.S1_s_at, Bt.2712.1.S1_at, Bt.28119.1.S1_at,	1	0.999998	100
Functional Group 104	Median: 0.6388563506963905	Geo: 0.6488984728172631	Bt.26992.1.A1_at, Bt.23103.1.S1_at, Bt.5000.1.S1_at, Bt.16079.1.S1_at, Bt.5141.1.S1_at, Bt.5141.1.S2_at, Bt.19522.1.S1_at, Bt.24256.1.S1_at, Bt.5308.1.S1_at,
Category	Term	Count	%	PValue	Genes	Bonferroni	Benjamini	FDR
GOTERM_CC_ALL	GO:0005798~Golgi-associated vesicle	3	0.0034	0.523789	Bt.26992.1.A1_at, Bt.23103.1.S1_at, Bt.5000.1.S1_at,	1	0.956009	99.9981
GOTERM_CC_ALL	GO:0044431~Golgi apparatus part	8	0.0092	0.638856	Bt.16079.1.S1_at, Bt.5141.1.S1_at, Bt.5141.1.S2_at, Bt.26992.1.A1_at, Bt.19522.1.S1_at, Bt.23103.1.S1_at, Bt.24256.1.S1_at, Bt.5000.1.S1_at, Bt.5308.1.S1_at,	1	0.983481	100
GOTERM_CC_ALL	GO:0000139~Golgi membrane	6	0.0069	0.816527	Bt.16079.1.S1_at, Bt.26992.1.A1_at, Bt.23103.1.S1_at, Bt.24256.1.S1_at, Bt.5000.1.S1_at, Bt.5308.1.S1_at,	1	0.998503	100
Functional Group 105	Median: 0.6380488479251021	Geo: 0.6547765333671134	Bt.15668.1.S1_at, Bt.24627.2.A1_a_at, Bt.1302.1.S1_at, Bt.3049.1.A1_at, Bt.16068.1.A1_at, Bt.2763.1.S1_at, Bt.2.1.S1_at, Bt.20602.1.S1_at, Bt.742.1.S2_at, Bt.21523.1.S1_at, Bt.7471.1.S1_at, Bt.5388.1.S1_s_at, Bt.5388.1.S1_at, Bt.5089.1.S2_at, Bt.18230.1.S1_a_at, Bt.4791.1.S1_at, Bt.21433.2.S1_at,
Category	Term	Count	%	PValue	Genes	Bonferroni	Benjamini	FDR
GOTERM_BP_ALL	GO:0009719~response to endogenous stimulus	9	0.0103	0.466479	Bt.15668.1.S1_at, Bt.24627.2.A1_a_at, Bt.1302.1.S1_at, Bt.3049.1.A1_at, Bt.16068.1.A1_at, Bt.2763.1.S1_at, Bt.2.1.S1_at, Bt.20602.1.S1_at, Bt.742.1.S2_at,	1	0.998927	99.9989
GOTERM_BP_ALL	GO:0006974~response to DNA damage stimulus	8	0.0092	0.525769	Bt.15668.1.S1_at, Bt.24627.2.A1_a_at, Bt.1302.1.S1_at, Bt.3049.1.A1_at, Bt.2763.1.S1_at, Bt.2.1.S1_at, Bt.20602.1.S1_at, Bt.742.1.S2_at,	1	0.999521	99.9999
GOTERM_BP_ALL	GO:0006281~DNA repair	6	0.0069	0.750329	Bt.15668.1.S1_at, Bt.24627.2.A1_a_at, Bt.1302.1.S1_at, Bt.3049.1.A1_at, Bt.20602.1.S1_at, Bt.742.1.S2_at,	1	0.999993	100
GOTERM_BP_ALL	GO:0006259~DNA metabolic process	12	0.0137	0.998834	Bt.15668.1.S1_at, Bt.21523.1.S1_at, Bt.7471.1.S1_at, Bt.24627.2.A1_a_at, Bt.5388.1.S1_s_at, Bt.5388.1.S1_at, Bt.5089.1.S2_at, Bt.18230.1.S1_a_at, Bt.1302.1.S1_at, Bt.3049.1.A1_at, Bt.4791.1.S1_at, Bt.20602.1.S1_at, Bt.21433.2.S1_at, Bt.742.1.S2_at,	1	1	100
Functional Group 106	Median: 0.6728686399906614	Geo: 0.6780978731407331	Bt.6438.1.A1_at, Bt.5478.1.S1_at, Bt.22840.1.S1_a_at, Bt.234.1.S1_at, Bt.18325.1.A1_at, Bt.18325.2.A1_a_at, Bt.4775.1.S1_at, Bt.4641.1.S1_at, Bt.1794.1.S1_a_at, Bt.5269.1.S1_at, Bt.5269.2.S1_at, Bt.22487.1.S1_at, Bt.22487.2.A1_a_at, Bt.22487.2.A1_at, Bt.4762.1.S1_at,
Category	Term	Count	%	PValue	Genes	Bonferroni	Benjamini	FDR
GOTERM_BP_ALL	GO:0051239~regulation of multicellular organismal process	8	0.0092	0.435961	Bt.6438.1.A1_at, Bt.5478.1.S1_at, Bt.22840.1.S1_a_at, Bt.234.1.S1_at, Bt.18325.1.A1_at, Bt.18325.2.A1_a_at, Bt.4775.1.S1_at, Bt.4641.1.S1_at, Bt.1794.1.S1_a_at,	1	0.998475	99.997
GOTERM_BP_ALL	GO:0051240~positive regulation of multicellular organismal process	4	0.0046	0.63613	Bt.6438.1.A1_at, Bt.5478.1.S1_at, Bt.22840.1.S1_a_at, Bt.4775.1.S1_at,	1	0.999937	100
GOTERM_BP_ALL	GO:0002253~activation of immune response	3	0.0034	0.638882	Bt.5478.1.S1_at, Bt.22840.1.S1_a_at, Bt.4775.1.S1_at,	1	0.999938	100
GOTERM_BP_ALL	GO:0002684~positive regulation of immune system process	3	0.0034	0.672869	Bt.5478.1.S1_at, Bt.22840.1.S1_a_at, Bt.4775.1.S1_at,	1	0.999966	100
GOTERM_BP_ALL	GO:0050778~positive regulation of immune response	3	0.0034	0.672869	Bt.5478.1.S1_at, Bt.22840.1.S1_a_at, Bt.4775.1.S1_at,	1	0.999966	100
GOTERM_BP_ALL	GO:0002682~regulation of immune system process	3	0.0034	0.746509	Bt.5478.1.S1_at, Bt.22840.1.S1_a_at, Bt.4775.1.S1_at,	1	0.999993	100
GOTERM_BP_ALL	GO:0050776~regulation of immune response	3	0.0034	0.746509	Bt.5478.1.S1_at, Bt.22840.1.S1_a_at, Bt.4775.1.S1_at,	1	0.999993	100
GOTERM_BP_ALL	GO:0006955~immune response	7	0.008	0.999988	Bt.5269.1.S1_at, Bt.5269.2.S1_at, Bt.5478.1.S1_at, Bt.22840.1.S1_a_at, Bt.22487.1.S1_at, Bt.22487.2.A1_a_at, Bt.22487.2.A1_at, Bt.234.1.S1_at, Bt.4775.1.S1_at, Bt.4762.1.S1_at,	1	1	100
Functional Group 107	Median: 0.6808819826426016	Geo: 0.6806732395030178	Bt.5218.1.S1_at, Bt.1302.1.S1_at, Bt.12738.1.S1_at, Bt.23171.2.S1_at, Bt.22574.1.S1_at, Bt.5885.1.S1_at, Bt.22854.2.S1_at,
Category	Term	Count	%	PValue	Genes	Bonferroni	Benjamini	FDR
GOTERM_MF_ALL	GO:0016829~lyase activity	7	0.008	0.644863	Bt.5218.1.S1_at, Bt.1302.1.S1_at, Bt.12738.1.S1_at, Bt.23171.2.S1_at, Bt.22574.1.S1_at, Bt.5885.1.S1_at, Bt.22854.2.S1_at,	1	0.999999	100
SP_PIR_KEYWORDS	lyase	5	0.0057	0.680882	Bt.5218.1.S1_at, Bt.1302.1.S1_at, Bt.23171.2.S1_at, Bt.22574.1.S1_at, Bt.22854.2.S1_at,	1	0.999235	100
GOTERM_MF_ALL	GO:0016835~carbon-oxygen lyase activity	3	0.0034	0.718252	Bt.5218.1.S1_at, Bt.1302.1.S1_at, Bt.22854.2.S1_at,	1	1	100
Functional Group 108	Median: 0.6777761218371673	Geo: 0.691556111714756	Bt.21766.2.S1_at, Bt.7236.1.S1_at, Bt.7648.1.S1_at, Bt.4641.1.S1_at,
Category	Term	Count	%	PValue	Genes	Bonferroni	Benjamini	FDR
GOTERM_BP_ALL	GO:0030097~hemopoiesis	4	0.0046	0.650416	Bt.21766.2.S1_at, Bt.7236.1.S1_at, Bt.7648.1.S1_at, Bt.4641.1.S1_at,	1	0.999948	100
GOTERM_BP_ALL	GO:0048534~hemopoietic or lymphoid organ development	4	0.0046	0.677776	Bt.21766.2.S1_at, Bt.7236.1.S1_at, Bt.7648.1.S1_at, Bt.4641.1.S1_at,	1	0.999969	100
GOTERM_BP_ALL	GO:0002520~immune system development	4	0.0046	0.750248	Bt.21766.2.S1_at, Bt.7236.1.S1_at, Bt.7648.1.S1_at, Bt.4641.1.S1_at,	1	0.999993	100
Functional Group 109	Median: 0.7332531188879035	Geo: 0.698289944817048	Bt.4816.1.S1_at, Bt.12144.2.S1_a_at, Bt.5075.1.S1_at, Bt.4314.1.S1_at, Bt.27234.1.S1_at, Bt.2712.1.S1_at, Bt.4775.1.S1_at, Bt.2353.1.S1_at, Bt.982.1.S1_at, Bt.982.1.S1_a_at, Bt.1794.1.S1_a_at,
Category	Term	Count	%	PValue	Genes	Bonferroni	Benjamini	FDR
GOTERM_MF_ALL	GO:0004857~enzyme inhibitor activity	10	0.0115	0.533901	Bt.4816.1.S1_at, Bt.12144.2.S1_a_at, Bt.5075.1.S1_at, Bt.4314.1.S1_at, Bt.27234.1.S1_at, Bt.2712.1.S1_at, Bt.4775.1.S1_at, Bt.2353.1.S1_at, Bt.982.1.S1_at, Bt.982.1.S1_a_at, Bt.1794.1.S1_a_at,	1	0.999981	99.9998
GOTERM_MF_ALL	GO:0004866~endopeptidase inhibitor activity	7	0.008	0.69842	Bt.12144.2.S1_a_at, Bt.5075.1.S1_at, Bt.27234.1.S1_at, Bt.2712.1.S1_at, Bt.2353.1.S1_at, Bt.982.1.S1_at, Bt.982.1.S1_a_at, Bt.1794.1.S1_a_at,	1	1	100
GOTERM_MF_ALL	GO:0030414~protease inhibitor activity	7	0.008	0.768086	Bt.12144.2.S1_a_at, Bt.5075.1.S1_at, Bt.27234.1.S1_at, Bt.2712.1.S1_at, Bt.2353.1.S1_at, Bt.982.1.S1_at, Bt.982.1.S1_a_at, Bt.1794.1.S1_a_at,	1	1	100
GOTERM_MF_ALL	GO:0004867~serine-type endopeptidase inhibitor activity	4	0.0046	0.830148	Bt.5075.1.S1_at, Bt.27234.1.S1_at, Bt.2712.1.S1_at, Bt.982.1.S1_at, Bt.982.1.S1_a_at,	1	1	100
Functional Group 110	Median: 0.7616305407825895	Geo: 0.7079892820283737	Bt.15903.1.S1_at, Bt.19676.2.S1_a_at, Bt.11606.2.S1_at, Bt.1679.1.S1_at, Bt.16051.1.S1_at, Bt.22464.1.A1_at,
Category	Term	Count	%	PValue	Genes	Bonferroni	Benjamini	FDR
GOTERM_MF_ALL	GO:0008757~S-adenosylmethionine-dependent methyltransferase activity	3	0.0034	0.594279	Bt.15903.1.S1_at, Bt.19676.2.S1_a_at, Bt.11606.2.S1_at,	1	0.999996	100
GOTERM_MF_ALL	GO:0008168~methyltransferase activity	6	0.0069	0.761631	Bt.1679.1.S1_at, Bt.16051.1.S1_at, Bt.15903.1.S1_at, Bt.19676.2.S1_a_at, Bt.11606.2.S1_at, Bt.22464.1.A1_at,	1	1	100
GOTERM_MF_ALL	GO:0016741~transferase activity, transferring one-carbon groups	6	0.0069	0.784053	Bt.1679.1.S1_at, Bt.16051.1.S1_at, Bt.15903.1.S1_at, Bt.19676.2.S1_a_at, Bt.11606.2.S1_at, Bt.22464.1.A1_at,	1	1	100
Functional Group 111	Median: 0.6261396333033354	Geo: 0.7258337695284547	Bt.7236.1.S1_at, Bt.9153.1.S1_at, Bt.13134.1.A1_at, Bt.13134.1.S1_at, Bt.8482.1.A1_at, Bt.800.1.S1_at, Bt.9023.1.S1_at, Bt.2632.1.S1_at, Bt.2899.1.S1_at, Bt.2899.1.S2_at, Bt.4557.1.S1_at, Bt.24181.1.S1_at, Bt.212.1.S1_at, Bt.13220.1.S1_at, Bt.6465.1.S1_at, Bt.2353.1.S1_at,
Category	Term	Count	%	PValue	Genes	Bonferroni	Benjamini	FDR
KEGG_PATHWAY	bta04620:Toll-like receptor signaling pathway	9	0.0103	0.605539	Bt.7236.1.S1_at, Bt.9153.1.S1_at, Bt.13134.1.A1_at, Bt.13134.1.S1_at, Bt.8482.1.A1_at, Bt.800.1.S1_at, Bt.9023.1.S1_at, Bt.2632.1.S1_at, Bt.2899.1.S1_at, Bt.2899.1.S2_at, Bt.4557.1.S1_at, Bt.24181.1.S1_at,	1	0.992679	99.999
KEGG_PATHWAY	bta04662:B cell receptor signaling pathway	5	0.0057	0.621517	Bt.7236.1.S1_at, Bt.9153.1.S1_at, Bt.13134.1.A1_at, Bt.13134.1.S1_at, Bt.9023.1.S1_at, Bt.2899.1.S1_at, Bt.2899.1.S2_at, Bt.212.1.S1_at,	1	0.993214	99.9994
KEGG_PATHWAY	bta05210:Colorectal cancer	7	0.008	0.62614	Bt.7236.1.S1_at, Bt.9153.1.S1_at, Bt.13134.1.A1_at, Bt.13134.1.S1_at, Bt.8482.1.A1_at, Bt.13220.1.S1_at, Bt.6465.1.S1_at, Bt.2899.1.S1_at, Bt.2899.1.S2_at, Bt.2353.1.S1_at,	1	0.9906	99.9995
KEGG_PATHWAY	bta04210:Apoptosis	4	0.0046	0.924379	Bt.7236.1.S1_at, Bt.9023.1.S1_at, Bt.6465.1.S1_at, Bt.212.1.S1_at,	1	0.999603	100
KEGG_PATHWAY	bta04660:T cell receptor signaling pathway	5	0.0057	0.924845	Bt.7236.1.S1_at, Bt.9153.1.S1_at, Bt.13134.1.A1_at, Bt.13134.1.S1_at, Bt.9023.1.S1_at, Bt.2899.1.S1_at, Bt.2899.1.S2_at, Bt.212.1.S1_at,	1	0.999557	100
Functional Group 112	Median: 0.873353230438197	Geo: 0.7265410070223928	Bt.5478.1.S1_at, Bt.4834.1.S1_at, Bt.9026.1.S1_at, Bt.23589.3.A1_a_at, Bt.7343.1.A1_at, Bt.1214.1.S1_at, Bt.20296.1.S1_at, Bt.8872.1.S2_at, Bt.4802.1.S1_at, Bt.7780.1.S1_at, Bt.8363.1.A1_at, Bt.12565.1.S1_at, Bt.126.1.S2_at, Bt.5107.1.S1_at, Bt.25669.1.S1_at, Bt.3960.2.S1_at, Bt.3960.1.S1_a_at, Bt.5369.1.S1_at, Bt.13349.1.S1_at, Bt.4099.1.S1_at,
Category	Term	Count	%	PValue	Genes	Bonferroni	Benjamini	FDR
GOTERM_MF_ALL	GO:0005262~calcium channel activity	4	0.0046	0.243581	Bt.5478.1.S1_at, Bt.4834.1.S1_at, Bt.9026.1.S1_at, Bt.23589.3.A1_a_at, Bt.7343.1.A1_at, Bt.1214.1.S1_at,	1	0.994574	99.14
GOTERM_BP_ALL	GO:0015674~di-, tri-valent inorganic cation transport	6	0.0069	0.544422	Bt.20296.1.S1_at, Bt.5478.1.S1_at, Bt.8872.1.S2_at, Bt.9026.1.S1_at, Bt.4802.1.S1_at, Bt.7780.1.S1_at, Bt.23589.3.A1_a_at, Bt.7343.1.A1_at, Bt.1214.1.S1_at,	1	0.999641	99.9999
SP_PIR_KEYWORDS	Calcium channel	3	0.0034	0.563105	Bt.5478.1.S1_at, Bt.9026.1.S1_at, Bt.23589.3.A1_a_at, Bt.7343.1.A1_at, Bt.1214.1.S1_at,	1	0.997285	99.9997
GOTERM_MF_ALL	GO:0046873~metal ion transmembrane transporter activity	9	0.0103	0.622831	Bt.5478.1.S1_at, Bt.8872.1.S2_at, Bt.4834.1.S1_at, Bt.8363.1.A1_at, Bt.9026.1.S1_at, Bt.12565.1.S1_at, Bt.126.1.S2_at, Bt.23589.3.A1_a_at, Bt.7343.1.A1_at, Bt.1214.1.S1_at, Bt.5107.1.S1_at,	1	0.999997	100
GOTERM_BP_ALL	GO:0006816~calcium ion transport	4	0.0046	0.63613	Bt.5478.1.S1_at, Bt.8872.1.S2_at, Bt.9026.1.S1_at, Bt.23589.3.A1_a_at, Bt.7343.1.A1_at, Bt.1214.1.S1_at,	1	0.999937	100
SP_PIR_KEYWORDS	calcium transport	3	0.0034	0.680214	Bt.5478.1.S1_at, Bt.9026.1.S1_at, Bt.23589.3.A1_a_at, Bt.7343.1.A1_at, Bt.1214.1.S1_at,	1	0.999271	100
GOTERM_MF_ALL	GO:0005261~cation channel activity	7	0.008	0.723079	Bt.5478.1.S1_at, Bt.4834.1.S1_at, Bt.8363.1.A1_at, Bt.9026.1.S1_at, Bt.126.1.S2_at, Bt.23589.3.A1_a_at, Bt.7343.1.A1_at, Bt.1214.1.S1_at, Bt.5107.1.S1_at,	1	1	100
GOTERM_MF_ALL	GO:0005216~ion channel activity	11	0.0126	0.869797	Bt.5478.1.S1_at, Bt.4834.1.S1_at, Bt.8363.1.A1_at, Bt.9026.1.S1_at, Bt.25669.1.S1_at, Bt.126.1.S2_at, Bt.3960.2.S1_at, Bt.3960.1.S1_a_at, Bt.5369.1.S1_at, Bt.13349.1.S1_at, Bt.23589.3.A1_a_at, Bt.7343.1.A1_at, Bt.1214.1.S1_at, Bt.5107.1.S1_at, Bt.4099.1.S1_at,	1	1	100
GOTERM_MF_ALL	GO:0022838~substrate specific channel activity	11	0.0126	0.876909	Bt.5478.1.S1_at, Bt.4834.1.S1_at, Bt.8363.1.A1_at, Bt.9026.1.S1_at, Bt.25669.1.S1_at, Bt.126.1.S2_at, Bt.3960.2.S1_at, Bt.3960.1.S1_a_at, Bt.5369.1.S1_at, Bt.13349.1.S1_at, Bt.23589.3.A1_a_at, Bt.7343.1.A1_at, Bt.1214.1.S1_at, Bt.5107.1.S1_at, Bt.4099.1.S1_at,	1	1	100
GOTERM_MF_ALL	GO:0022832~voltage-gated channel activity	4	0.0046	0.890736	Bt.5478.1.S1_at, Bt.4834.1.S1_at, Bt.8363.1.A1_at, Bt.126.1.S2_at,	1	1	100
GOTERM_MF_ALL	GO:0005244~voltage-gated ion channel activity	4	0.0046	0.890736	Bt.5478.1.S1_at, Bt.4834.1.S1_at, Bt.8363.1.A1_at, Bt.126.1.S2_at,	1	1	100
GOTERM_MF_ALL	GO:0022803~passive transmembrane transporter activity	11	0.0126	0.902269	Bt.5478.1.S1_at, Bt.4834.1.S1_at, Bt.8363.1.A1_at, Bt.9026.1.S1_at, Bt.25669.1.S1_at, Bt.126.1.S2_at, Bt.3960.2.S1_at, Bt.3960.1.S1_a_at, Bt.5369.1.S1_at, Bt.13349.1.S1_at, Bt.23589.3.A1_a_at, Bt.7343.1.A1_at, Bt.1214.1.S1_at, Bt.5107.1.S1_at, Bt.4099.1.S1_at,	1	1	100
GOTERM_MF_ALL	GO:0015267~channel activity	11	0.0126	0.902269	Bt.5478.1.S1_at, Bt.4834.1.S1_at, Bt.8363.1.A1_at, Bt.9026.1.S1_at, Bt.25669.1.S1_at, Bt.126.1.S2_at, Bt.3960.2.S1_at, Bt.3960.1.S1_a_at, Bt.5369.1.S1_at, Bt.13349.1.S1_at, Bt.23589.3.A1_a_at, Bt.7343.1.A1_at, Bt.1214.1.S1_at, Bt.5107.1.S1_at, Bt.4099.1.S1_at,	1	1	100
GOTERM_MF_ALL	GO:0022843~voltage-gated cation channel activity	3	0.0034	0.916072	Bt.5478.1.S1_at, Bt.4834.1.S1_at, Bt.126.1.S2_at,	1	1	100
SP_PIR_KEYWORDS	Ionic channel	6	0.0069	0.955055	Bt.5478.1.S1_at, Bt.9026.1.S1_at, Bt.126.1.S2_at, Bt.5369.1.S1_at, Bt.13349.1.S1_at, Bt.23589.3.A1_a_at, Bt.7343.1.A1_at, Bt.1214.1.S1_at, Bt.5107.1.S1_at,	1	1	100
GOTERM_MF_ALL	GO:0022836~gated channel activity	6	0.0069	0.96105	Bt.5478.1.S1_at, Bt.4834.1.S1_at, Bt.8363.1.A1_at, Bt.9026.1.S1_at, Bt.126.1.S2_at, Bt.5107.1.S1_at,	1	1	100
Functional Group 113	Median: 0.9716653343565647	Geo: 0.7314338373859298	Bt.21523.1.S1_at, Bt.2964.1.S1_at, Bt.28037.1.S1_at, Bt.2353.1.S1_at, Bt.28119.1.S1_at, Bt.7471.1.S1_at, Bt.5388.1.S1_s_at, Bt.5388.1.S1_at, Bt.5089.1.S2_at, Bt.21491.1.S1_at, Bt.742.1.S2_at, Bt.5334.1.S1_at, Bt.1758.1.S1_at, Bt.15668.1.S1_at, Bt.18230.1.S1_a_at,
Category	Term	Count	%	PValue	Genes	Bonferroni	Benjamini	FDR
GOTERM_CC_ALL	GO:0000775~chromosome, pericentric region	5	0.0057	0.100803	Bt.21523.1.S1_at, Bt.2964.1.S1_at, Bt.28037.1.S1_at, Bt.2353.1.S1_at, Bt.28119.1.S1_at,	1	0.49143	78.8694
INTERPRO	IPR007125:Histone core	3	0.0034	0.464648	Bt.21523.1.S1_at, Bt.7471.1.S1_at, Bt.5388.1.S1_s_at, Bt.5388.1.S1_at, Bt.5089.1.S2_at,	1	1	99.9989
SP_PIR_KEYWORDS	Chromosomal protein	5	0.0057	0.533447	Bt.21523.1.S1_at, Bt.7471.1.S1_at, Bt.5388.1.S1_s_at, Bt.5388.1.S1_at, Bt.5089.1.S2_at, Bt.21491.1.S1_at, Bt.742.1.S2_at,	1	0.996713	99.9991
SP_PIR_KEYWORDS	Nucleosome core	3	0.0034	0.625185	Bt.21523.1.S1_at, Bt.7471.1.S1_at, Bt.5388.1.S1_s_at, Bt.5388.1.S1_at, Bt.5089.1.S2_at,	1	0.998403	100
INTERPRO	IPR009072:Histone-fold	3	0.0034	0.661576	Bt.21523.1.S1_at, Bt.7471.1.S1_at, Bt.5388.1.S1_s_at, Bt.5388.1.S1_at, Bt.5089.1.S2_at,	1	1	100
GOTERM_CC_ALL	GO:0044427~chromosomal part	11	0.0126	0.834415	Bt.21523.1.S1_at, Bt.7471.1.S1_at, Bt.5334.1.S1_at, Bt.5388.1.S1_s_at, Bt.5388.1.S1_at, Bt.5089.1.S2_at, Bt.2964.1.S1_at, Bt.21491.1.S1_at, Bt.28037.1.S1_at, Bt.2353.1.S1_at, Bt.28119.1.S1_at, Bt.1758.1.S1_at, Bt.742.1.S2_at,	1	0.998941	100
GOTERM_CC_ALL	GO:0005694~chromosome	12	0.0137	0.853517	Bt.15668.1.S1_at, Bt.21523.1.S1_at, Bt.7471.1.S1_at, Bt.5334.1.S1_at, Bt.5388.1.S1_s_at, Bt.5388.1.S1_at, Bt.5089.1.S2_at, Bt.2964.1.S1_at, Bt.21491.1.S1_at, Bt.28037.1.S1_at, Bt.2353.1.S1_at, Bt.28119.1.S1_at, Bt.1758.1.S1_at, Bt.742.1.S2_at,	1	0.999303	100
GOTERM_CC_ALL	GO:0000785~chromatin	7	0.008	0.950991	Bt.21523.1.S1_at, Bt.7471.1.S1_at, Bt.5334.1.S1_at, Bt.5388.1.S1_s_at, Bt.5388.1.S1_at, Bt.5089.1.S2_at, Bt.21491.1.S1_at, Bt.1758.1.S1_at, Bt.742.1.S2_at,	1	0.999986	100
GOTERM_BP_ALL	GO:0065004~protein-DNA complex assembly	4	0.0046	0.992339	Bt.21523.1.S1_at, Bt.7471.1.S1_at, Bt.5388.1.S1_s_at, Bt.5388.1.S1_at, Bt.5089.1.S2_at, Bt.742.1.S2_at,	1	1	100
GOTERM_BP_ALL	GO:0006325~establishment and/or maintenance of chromatin architecture	5	0.0057	0.992879	Bt.21523.1.S1_at, Bt.7471.1.S1_at, Bt.5388.1.S1_s_at, Bt.5388.1.S1_at, Bt.5089.1.S2_at, Bt.18230.1.S1_a_at, Bt.742.1.S2_at,	1	1	100
GOTERM_BP_ALL	GO:0006323~DNA packaging	5	0.0057	0.992879	Bt.21523.1.S1_at, Bt.7471.1.S1_at, Bt.5388.1.S1_s_at, Bt.5388.1.S1_at, Bt.5089.1.S2_at, Bt.18230.1.S1_a_at, Bt.742.1.S2_at,	1	1	100
GOTERM_BP_ALL	GO:0006334~nucleosome assembly	3	0.0034	0.993866	Bt.21523.1.S1_at, Bt.7471.1.S1_at, Bt.5388.1.S1_s_at, Bt.5388.1.S1_at, Bt.5089.1.S2_at,	1	1	100
GOTERM_CC_ALL	GO:0000786~nucleosome	3	0.0034	0.994143	Bt.21523.1.S1_at, Bt.7471.1.S1_at, Bt.5388.1.S1_s_at, Bt.5388.1.S1_at, Bt.5089.1.S2_at,	1	1	100
GOTERM_BP_ALL	GO:0031497~chromatin assembly	3	0.0034	0.995535	Bt.21523.1.S1_at, Bt.7471.1.S1_at, Bt.5388.1.S1_s_at, Bt.5388.1.S1_at, Bt.5089.1.S2_at,	1	1	100
GOTERM_BP_ALL	GO:0051276~chromosome organization and biogenesis	5	0.0057	0.997629	Bt.21523.1.S1_at, Bt.7471.1.S1_at, Bt.5388.1.S1_s_at, Bt.5388.1.S1_at, Bt.5089.1.S2_at, Bt.18230.1.S1_a_at, Bt.742.1.S2_at,	1	1	100
GOTERM_BP_ALL	GO:0006333~chromatin assembly or disassembly	3	0.0034	0.998848	Bt.21523.1.S1_at, Bt.7471.1.S1_at, Bt.5388.1.S1_s_at, Bt.5388.1.S1_at, Bt.5089.1.S2_at,	1	1	100
Functional Group 114	Median: 0.7149169943609663	Geo: 0.7317436822482504	Bt.13445.2.S1_a_at, Bt.8479.1.A1_at, Bt.5134.1.S1_at, Bt.4434.1.A1_at, Bt.6465.1.S1_at, Bt.10609.2.A1_at, Bt.16514.2.A1_s_at, Bt.621.1.S1_at,
Category	Term	Count	%	PValue	Genes	Bonferroni	Benjamini	FDR
GOTERM_MF_ALL	GO:0020037~heme binding	7	0.008	0.672337	Bt.13445.2.S1_a_at, Bt.8479.1.A1_at, Bt.5134.1.S1_at, Bt.4434.1.A1_at, Bt.6465.1.S1_at, Bt.10609.2.A1_at, Bt.16514.2.A1_s_at, Bt.621.1.S1_at,	1	0.999999	100
GOTERM_MF_ALL	GO:0046906~tetrapyrrole binding	7	0.008	0.672337	Bt.13445.2.S1_a_at, Bt.8479.1.A1_at, Bt.5134.1.S1_at, Bt.4434.1.A1_at, Bt.6465.1.S1_at, Bt.10609.2.A1_at, Bt.16514.2.A1_s_at, Bt.621.1.S1_at,	1	0.999999	100
INTERPRO	IPR001128:Cytochrome P450	3	0.0034	0.757497	Bt.10609.2.A1_at, Bt.16514.2.A1_s_at, Bt.621.1.S1_at,	1	1	100
GOTERM_MF_ALL	GO:0004497~monooxygenase activity	4	0.0046	0.837299	Bt.8479.1.A1_at, Bt.10609.2.A1_at, Bt.16514.2.A1_s_at, Bt.621.1.S1_at,	1	1	100
Functional Group 115	Median: 0.7774758284437255	Geo: 0.7407046905818978	Bt.4790.1.S1_at, Bt.9023.1.S1_at, Bt.29696.1.A1_at, Bt.29696.1.S1_at, Bt.21540.1.S1_at, Bt.4322.1.A1_at,
Category	Term	Count	%	PValue	Genes	Bonferroni	Benjamini	FDR
SMART	SM00219:TyrKc	3	0.0034	0.593678	Bt.4790.1.S1_at, Bt.9023.1.S1_at, Bt.29696.1.A1_at, Bt.29696.1.S1_at, Bt.21540.1.S1_at,	1	1	99.9998
INTERPRO	IPR001245:Tyrosine protein kinase	3	0.0034	0.777476	Bt.4790.1.S1_at, Bt.9023.1.S1_at, Bt.29696.1.A1_at, Bt.29696.1.S1_at, Bt.21540.1.S1_at,	1	1	100
GOTERM_MF_ALL	GO:0004713~protein-tyrosine kinase activity	4	0.0046	0.880435	Bt.4790.1.S1_at, Bt.9023.1.S1_at, Bt.4322.1.A1_at, Bt.29696.1.A1_at, Bt.29696.1.S1_at, Bt.21540.1.S1_at,	1	1	100
Functional Group 116	Median: 0.755545070870107	Geo: 0.750983650014734	Bt.224.1.S1_at, Bt.4834.1.S1_at, Bt.4138.1.S1_a_at, Bt.13053.1.A1_at, Bt.8353.1.A1_at, Bt.2582.1.S1_at, Bt.28224.1.A1_at,
Category	Term	Count	%	PValue	Genes	Bonferroni	Benjamini	FDR
GOTERM_MF_ALL	GO:0008201~heparin binding	3	0.0034	0.557541	Bt.224.1.S1_at, Bt.4834.1.S1_at, Bt.4138.1.S1_a_at,	1	0.999988	99.9999
SP_PIR_KEYWORDS	heparin-binding	3	0.0034	0.728471	Bt.224.1.S1_at, Bt.4834.1.S1_at, Bt.4138.1.S1_a_at,	1	0.999682	100
GOTERM_MF_ALL	GO:0005539~glycosaminoglycan binding	3	0.0034	0.743783	Bt.224.1.S1_at, Bt.4834.1.S1_at, Bt.4138.1.S1_a_at,	1	1	100
GOTERM_MF_ALL	GO:0030247~polysaccharide binding	3	0.0034	0.767307	Bt.224.1.S1_at, Bt.4834.1.S1_at, Bt.4138.1.S1_a_at,	1	1	100
GOTERM_MF_ALL	GO:0001871~pattern binding	3	0.0034	0.799065	Bt.224.1.S1_at, Bt.4834.1.S1_at, Bt.4138.1.S1_a_at,	1	1	100
GOTERM_MF_ALL	GO:0030246~carbohydrate binding	6	0.0069	0.968492	Bt.224.1.S1_at, Bt.4834.1.S1_at, Bt.13053.1.A1_at, Bt.8353.1.A1_at, Bt.4138.1.S1_a_at, Bt.2582.1.S1_at, Bt.28224.1.A1_at,	1	1	100
Functional Group 117	Median: 0.8724398858929836	Geo: 0.7676535635083729	Bt.5197.2.S1_at, Bt.1302.1.S1_at, Bt.23098.2.S1_at, Bt.24627.2.A1_a_at,
Category	Term	Count	%	PValue	Genes	Bonferroni	Benjamini	FDR
SP_PIR_KEYWORDS	Endonuclease	3	0.0034	0.563105	Bt.5197.2.S1_at, Bt.1302.1.S1_at, Bt.23098.2.S1_at,	1	0.997285	99.9997
GOTERM_MF_ALL	GO:0004519~endonuclease activity	3	0.0034	0.87244	Bt.5197.2.S1_at, Bt.1302.1.S1_at, Bt.23098.2.S1_at,	1	1	100
GOTERM_MF_ALL	GO:0004518~nuclease activity	4	0.0046	0.920812	Bt.24627.2.A1_a_at, Bt.5197.2.S1_at, Bt.1302.1.S1_at, Bt.23098.2.S1_at,	1	1	100
Functional Group 118	Median: 0.7730509437461335	Geo: 0.7741004023513822	Bt.5141.1.S1_at, Bt.5141.1.S2_at, Bt.2582.1.S1_at, Bt.28224.1.A1_at, Bt.17280.1.S1_at, Bt.869.1.S1_at, Bt.5434.1.S1_at, Bt.4476.1.S1_at, Bt.983.1.S1_at,
Category	Term	Count	%	PValue	Genes	Bonferroni	Benjamini	FDR
GOTERM_MF_ALL	GO:0008194~UDP-glycosyltransferase activity	3	0.0034	0.594279	Bt.5141.1.S1_at, Bt.5141.1.S2_at, Bt.2582.1.S1_at, Bt.28224.1.A1_at, Bt.17280.1.S1_at,	1	0.999996	100
GOTERM_BP_ALL	GO:0006486~protein amino acid glycosylation	3	0.0034	0.771736	Bt.5141.1.S1_at, Bt.5141.1.S2_at, Bt.869.1.S1_at, Bt.2582.1.S1_at, Bt.28224.1.A1_at,	1	0.999996	100
GOTERM_BP_ALL	GO:0009101~glycoprotein biosynthetic process	3	0.0034	0.771736	Bt.5141.1.S1_at, Bt.5141.1.S2_at, Bt.869.1.S1_at, Bt.2582.1.S1_at, Bt.28224.1.A1_at,	1	0.999996	100
GOTERM_MF_ALL	GO:0016758~transferase activity, transferring hexosyl groups	5	0.0057	0.773051	Bt.5141.1.S1_at, Bt.5141.1.S2_at, Bt.869.1.S1_at, Bt.2582.1.S1_at, Bt.28224.1.A1_at, Bt.5434.1.S1_at, Bt.17280.1.S1_at,	1	1	100
GOTERM_BP_ALL	GO:0043413~biopolymer glycosylation	3	0.0034	0.78351	Bt.5141.1.S1_at, Bt.5141.1.S2_at, Bt.869.1.S1_at, Bt.2582.1.S1_at, Bt.28224.1.A1_at,	1	0.999997	100
GOTERM_BP_ALL	GO:0009100~glycoprotein metabolic process	3	0.0034	0.843518	Bt.5141.1.S1_at, Bt.5141.1.S2_at, Bt.869.1.S1_at, Bt.2582.1.S1_at, Bt.28224.1.A1_at,	1	1	100
GOTERM_MF_ALL	GO:0016757~transferase activity, transferring glycosyl groups	7	0.008	0.921098	Bt.5141.1.S1_at, Bt.5141.1.S2_at, Bt.869.1.S1_at, Bt.4476.1.S1_at, Bt.2582.1.S1_at, Bt.28224.1.A1_at, Bt.5434.1.S1_at, Bt.17280.1.S1_at, Bt.983.1.S1_at,	1	1	100
Functional Group 119	Median: 0.828999283064629	Geo: 0.7787252631941826	Bt.6404.1.S1_at, Bt.4606.1.S1_at, Bt.24522.3.S1_a_at, Bt.12613.1.S1_at, Bt.4606.2.S1_at, Bt.27020.1.A1_at, Bt.9889.1.S1_at,
Category	Term	Count	%	PValue	Genes	Bonferroni	Benjamini	FDR
SMART	SM00355:ZnF_C2H2	3	0.0034	0.675345	Bt.6404.1.S1_at, Bt.4606.1.S1_at, Bt.24522.3.S1_a_at, Bt.12613.1.S1_at, Bt.4606.2.S1_at, Bt.27020.1.A1_at,	1	1	100
INTERPRO	IPR015880:Zinc finger, C2H2-like	3	0.0034	0.828999	Bt.6404.1.S1_at, Bt.4606.1.S1_at, Bt.24522.3.S1_a_at, Bt.12613.1.S1_at, Bt.4606.2.S1_at, Bt.27020.1.A1_at,	1	1	100
INTERPRO	IPR007087:Zinc finger, C2H2-type	4	0.0046	0.843476	Bt.6404.1.S1_at, Bt.4606.1.S1_at, Bt.24522.3.S1_a_at, Bt.12613.1.S1_at, Bt.4606.2.S1_at, Bt.9889.1.S1_at, Bt.27020.1.A1_at,	1	1	100
Functional Group 120	Median: 0.809291904044474	Geo: 0.785023970437308	Bt.7236.1.S1_at, Bt.8482.1.A1_at, Bt.9023.1.S1_at, Bt.20230.1.S1_at, Bt.272.1.S1_at, Bt.13220.1.S1_at, Bt.4138.1.S1_a_at, Bt.29696.1.A1_at, Bt.29696.1.S1_at, Bt.21540.1.S1_at, Bt.9603.1.A1_at, Bt.9603.2.S1_at, Bt.21444.1.S1_at, Bt.6440.1.S1_at,
Category	Term	Count	%	PValue	Genes	Bonferroni	Benjamini	FDR
KEGG_PATHWAY	bta05221:Acute myeloid leukemia	5	0.0057	0.657998	Bt.7236.1.S1_at, Bt.8482.1.A1_at, Bt.9023.1.S1_at, Bt.20230.1.S1_at, Bt.272.1.S1_at,	1	0.991138	99.9998
KEGG_PATHWAY	bta05212:Pancreatic cancer	5	0.0057	0.803921	Bt.7236.1.S1_at, Bt.8482.1.A1_at, Bt.9023.1.S1_at, Bt.13220.1.S1_at, Bt.4138.1.S1_a_at,	1	0.997869	100
KEGG_PATHWAY	bta04930:Type II diabetes mellitus	3	0.0034	0.809292	Bt.7236.1.S1_at, Bt.8482.1.A1_at, Bt.9023.1.S1_at,	1	0.997825	100
KEGG_PATHWAY	bta05215:Prostate cancer	6	0.0069	0.823021	Bt.7236.1.S1_at, Bt.8482.1.A1_at, Bt.9023.1.S1_at, Bt.29696.1.A1_at, Bt.29696.1.S1_at, Bt.21540.1.S1_at, Bt.9603.1.A1_at, Bt.9603.2.S1_at, Bt.21444.1.S1_at,	1	0.99789	100
KEGG_PATHWAY	bta05220:Chronic myeloid leukemia	5	0.0057	0.846176	Bt.7236.1.S1_at, Bt.8482.1.A1_at, Bt.9023.1.S1_at, Bt.13220.1.S1_at, Bt.6440.1.S1_at,	1	0.99836	100
Functional Group 121	Median: 0.9947763182458933	Geo: 0.8133881240156593	Bt.2573.1.S1_at, Bt.77.1.S1_at, Bt.15698.1.S1_at, Bt.4557.1.S1_at, Bt.117.1.S1_at, Bt.7194.1.S1_at, Bt.20230.1.S1_at, Bt.3960.2.S1_at, Bt.3960.1.S1_a_at, Bt.5397.1.S1_at, Bt.5369.1.S1_at, Bt.13349.1.S1_at, Bt.3080.1.S1_a_at, Bt.24931.1.A1_at, Bt.10880.1.S1_at, Bt.19709.1.S1_at, Bt.5197.2.S1_at, Bt.29281.1.S1_at, Bt.24676.2.A1_at, Bt.4637.1.A1_a_at, Bt.29570.1.S1_at, Bt.11714.1.S1_at, Bt.4099.1.S1…
Category	Term	Count	%	PValue	Genes	Bonferroni	Benjamini	FDR
SP_PIR_KEYWORDS	membrane	111	0.1271	0.215929	Bt.2573.1.S1_at, Bt.77.1.S1_at, Bt.15698.1.S1_at, Bt.4557.1.S1_at, Bt.117.1.S1_at, Bt.7194.1.S1_at, Bt.20230.1.S1_at, Bt.3960.2.S1_at, Bt.3960.1.S1_a_at, Bt.5397.1.S1_at, Bt.5369.1.S1_at, Bt.13349.1.S1_at, Bt.3080.1.S1_a_at, Bt.24931.1.A1_at, Bt.10880.1.S1_at, Bt.19709.1.S1_at, Bt.5197.2.S1_at, Bt.29281.1.S1_at, Bt.24676.2.A1_at, Bt.4637.1.A1_a_at, Bt.29570.1.S1_at, Bt.11714.1.S1_at, Bt.4099.1.S1…	1	0.933396	97.5088
UP_SEQ_FEATURE	transmembrane region	43	0.0493	0.709049	Bt.2573.1.S1_at, Bt.4360.1.S1_at, Bt.5141.1.S1_at, Bt.5141.1.S2_at, Bt.2626.1.S1_at, Bt.77.1.S1_at, Bt.499.1.S1_a_at, Bt.4557.1.S1_at, Bt.2582.1.S1_at, Bt.28224.1.A1_at, Bt.12761.1.A1_at, Bt.5107.1.S1_at, Bt.5434.1.S1_at, Bt.4679.1.S1_at, Bt.126.1.S2_at, Bt.5134.1.S1_at, Bt.4434.1.A1_at, Bt.13744.1.A1_at, Bt.21137.2.S1_at, Bt.21137.1.S1_at, Bt.24343.1.A1_at, Bt.10880.1.S1_at, Bt.27347.1.A1_at, Bt…	1	1	100
UP_SEQ_FEATURE	topological domain:Extracellular	25	0.0286	0.892365	Bt.2573.1.S1_at, Bt.2626.1.S1_at, Bt.4557.1.S1_at, Bt.499.1.S1_a_at, Bt.12761.1.A1_at, Bt.5107.1.S1_at, Bt.4679.1.S1_at, Bt.126.1.S2_at, Bt.13744.1.A1_at, Bt.21137.2.S1_at, Bt.21137.1.S1_at, Bt.24343.1.A1_at, Bt.27347.1.A1_at, Bt.557.1.S1_at, Bt.23659.1.S1_at, Bt.9026.1.S1_at, Bt.4768.1.S2_at, Bt.4107.1.S1_at, Bt.4695.1.S1_at, Bt.236.1.S1_at, Bt.6074.1.S1_at, Bt.26992.1.A1_at, Bt.8131.1.S1_at, Bt…	1	1	100
UP_SEQ_FEATURE	topological domain:Cytoplasmic	30	0.0344	0.937605	Bt.2573.1.S1_at, Bt.4360.1.S1_at, Bt.5141.1.S1_at, Bt.5141.1.S2_at, Bt.2626.1.S1_at, Bt.499.1.S1_a_at, Bt.4557.1.S1_at, Bt.2582.1.S1_at, Bt.28224.1.A1_at, Bt.12761.1.A1_at, Bt.5107.1.S1_at, Bt.4679.1.S1_at, Bt.126.1.S2_at, Bt.13744.1.A1_at, Bt.21137.2.S1_at, Bt.21137.1.S1_at, Bt.24343.1.A1_at, Bt.27347.1.A1_at, Bt.9026.1.S1_at, Bt.557.1.S1_at, Bt.23659.1.S1_at, Bt.4768.1.S2_at, Bt.23205.1.S1_s_at…	1	1	100
SP_PIR_KEYWORDS	transmembrane	73	0.0836	0.989748	Bt.20296.1.S1_at, Bt.2573.1.S1_at, Bt.4360.1.S1_at, Bt.11211.1.S1_at, Bt.2626.1.S1_at, Bt.77.1.S1_at, Bt.15698.1.S1_at, Bt.10146.1.S1_at, Bt.10146.2.S1_at, Bt.4557.1.S1_at, Bt.16821.1.S1_at, Bt.4679.1.S1_at, Bt.3960.2.S1_at, Bt.3960.1.S1_a_at, Bt.5397.1.S1_at, Bt.5369.1.S1_at, Bt.13349.1.S1_at, Bt.24343.1.A1_at, Bt.6289.1.S1_at, Bt.24931.1.A1_at, Bt.10880.1.S1_at, Bt.19709.1.S1_at, Bt.9026.1.S1_a…	1	1	100
GOTERM_CC_ALL	GO:0016020~membrane	204	0.2337	0.999804	Bt.5609.3.A1_a_at, Bt.5609.1.A1_a_at, Bt.9657.1.S1_at, Bt.3806.1.A1_at, Bt.15698.1.S1_at, Bt.77.1.S1_at, Bt.4557.1.S1_at, Bt.7886.1.S1_at, Bt.26836.2.A1_at, Bt.117.1.S1_at, Bt.21875.1.S1_at, Bt.59.1.S1_at, Bt.3080.1.S1_a_at, Bt.5369.1.S1_at, Bt.13349.1.S1_at, Bt.12896.1.S1_at, Bt.24931.1.A1_at, Bt.10880.1.S1_at, Bt.19709.1.S1_at, Bt.4637.1.A1_a_at, Bt.5510.1.S1_at, Bt.621.1.S1_at, Bt.8724.1.S1_at…	1	1	100
GOTERM_CC_ALL	GO:0044425~membrane part	144	0.1649	0.999983	Bt.5609.3.A1_a_at, Bt.5609.1.A1_a_at, Bt.1990.1.S1_at, Bt.2573.1.S1_at, Bt.442.1.S1_at, Bt.11465.1.S1_at, Bt.3806.1.A1_at, Bt.6465.1.S1_at, Bt.77.1.S1_at, Bt.15698.1.S1_at, Bt.4557.1.S1_at, Bt.7886.1.S1_at, Bt.26836.2.A1_at, Bt.117.1.S1_at, Bt.7194.1.S1_at, Bt.21875.1.S1_at, Bt.20230.1.S1_at, Bt.3960.2.S1_at, Bt.3960.1.S1_a_at, Bt.5397.1.S1_at, Bt.404.1.S1_at, Bt.4540.1.S1_at, Bt.5369.1.S1_at, Bt…	1	1	100
UP_SEQ_FEATURE	glycosylation site:N-linked (GlcNAc...)	32	0.0367	0.99999	Bt.2573.1.S1_at, Bt.5141.1.S1_at, Bt.5141.1.S2_at, Bt.2626.1.S1_at, Bt.499.1.S1_a_at, Bt.4557.1.S1_at, Bt.2582.1.S1_at, Bt.28224.1.A1_at, Bt.12761.1.A1_at, Bt.5107.1.S1_at, Bt.28686.2.S1_at, Bt.1794.1.S1_a_at, Bt.6438.1.A1_at, Bt.4679.1.S1_at, Bt.2632.1.S1_at, Bt.13744.1.A1_at, Bt.21137.2.S1_at, Bt.21137.1.S1_at, Bt.23268.1.S1_at, Bt.557.1.S1_at, Bt.23659.1.S1_at, Bt.4138.1.S1_a_at, Bt.982.1.S1_a…	1	1	100
GOTERM_CC_ALL	GO:0016021~integral to membrane	107	0.1226	1	Bt.2573.1.S1_at, Bt.11465.1.S1_at, Bt.3806.1.A1_at, Bt.15698.1.S1_at, Bt.77.1.S1_at, Bt.4557.1.S1_at, Bt.7886.1.S1_at, Bt.26836.2.A1_at, Bt.21875.1.S1_at, Bt.5397.1.S1_at, Bt.3960.2.S1_at, Bt.3960.1.S1_a_at, Bt.5369.1.S1_at, Bt.13349.1.S1_at, Bt.24931.1.A1_at, Bt.10880.1.S1_at, Bt.19709.1.S1_at, Bt.4637.1.A1_a_at, Bt.29570.1.S1_at, Bt.11714.1.S1_at, Bt.4099.1.S1_at, Bt.23205.1.S1_s_at, Bt.621.1.S…	1	1	100
GOTERM_CC_ALL	GO:0031224~intrinsic to membrane	107	0.1226	1	Bt.2573.1.S1_at, Bt.11465.1.S1_at, Bt.3806.1.A1_at, Bt.15698.1.S1_at, Bt.77.1.S1_at, Bt.4557.1.S1_at, Bt.7886.1.S1_at, Bt.26836.2.A1_at, Bt.21875.1.S1_at, Bt.5397.1.S1_at, Bt.3960.2.S1_at, Bt.3960.1.S1_a_at, Bt.5369.1.S1_at, Bt.13349.1.S1_at, Bt.24931.1.A1_at, Bt.10880.1.S1_at, Bt.19709.1.S1_at, Bt.4637.1.A1_a_at, Bt.29570.1.S1_at, Bt.11714.1.S1_at, Bt.4099.1.S1_at, Bt.23205.1.S1_s_at, Bt.621.1.S…	1	1	100
Functional Group 122	Median: 0.888042666345078	Geo: 0.82081944770445	Bt.9731.1.S1_at, Bt.1302.1.S1_at, Bt.23128.2.A1_at, Bt.4775.1.S1_at, Bt.4802.1.S1_at, Bt.7780.1.S1_at, Bt.3080.1.S1_a_at, Bt.16068.1.A1_at, Bt.19517.1.S1_at, Bt.5534.1.S1_at, Bt.7908.1.S1_at, Bt.23268.1.S1_at, Bt.7157.1.S1_at,
Category	Term	Count	%	PValue	Genes	Bonferroni	Benjamini	FDR
GOTERM_BP_ALL	GO:0019725~cellular homeostasis	9	0.0103	0.477008	Bt.9731.1.S1_at, Bt.1302.1.S1_at, Bt.23128.2.A1_at, Bt.4775.1.S1_at, Bt.4802.1.S1_at, Bt.7780.1.S1_at, Bt.3080.1.S1_a_at, Bt.16068.1.A1_at, Bt.19517.1.S1_at, Bt.5534.1.S1_at,	1	0.999095	99.9993
GOTERM_BP_ALL	GO:0048878~chemical homeostasis	6	0.0069	0.713606	Bt.7908.1.S1_at, Bt.23268.1.S1_at, Bt.4775.1.S1_at, Bt.4802.1.S1_at, Bt.7780.1.S1_at, Bt.19517.1.S1_at, Bt.7157.1.S1_at,	1	0.999985	100
GOTERM_BP_ALL	GO:0030005~cellular di-, tri-valent inorganic cation homeostasis	3	0.0034	0.851914	Bt.4775.1.S1_at, Bt.4802.1.S1_at, Bt.7780.1.S1_at, Bt.19517.1.S1_at,	1	1	100
GOTERM_BP_ALL	GO:0055066~di-, tri-valent inorganic cation homeostasis	3	0.0034	0.859898	Bt.4775.1.S1_at, Bt.4802.1.S1_at, Bt.7780.1.S1_at, Bt.19517.1.S1_at,	1	1	100
GOTERM_BP_ALL	GO:0030003~cellular cation homeostasis	3	0.0034	0.888043	Bt.4775.1.S1_at, Bt.4802.1.S1_at, Bt.7780.1.S1_at, Bt.19517.1.S1_at,	1	1	100
GOTERM_BP_ALL	GO:0055080~cation homeostasis	3	0.0034	0.894211	Bt.4775.1.S1_at, Bt.4802.1.S1_at, Bt.7780.1.S1_at, Bt.19517.1.S1_at,	1	1	100
GOTERM_BP_ALL	GO:0055082~cellular chemical homeostasis	3	0.0034	0.94067	Bt.4775.1.S1_at, Bt.4802.1.S1_at, Bt.7780.1.S1_at, Bt.19517.1.S1_at,	1	1	100
GOTERM_BP_ALL	GO:0006873~cellular ion homeostasis	3	0.0034	0.94067	Bt.4775.1.S1_at, Bt.4802.1.S1_at, Bt.7780.1.S1_at, Bt.19517.1.S1_at,	1	1	100
GOTERM_BP_ALL	GO:0050801~ion homeostasis	3	0.0034	0.96528	Bt.4775.1.S1_at, Bt.4802.1.S1_at, Bt.7780.1.S1_at, Bt.19517.1.S1_at,	1	1	100
Functional Group 123	Median: 0.9064023072843337	Geo: 0.8383020003462297	Bt.4748.1.S1_at, Bt.4360.1.S1_at, Bt.5141.1.S1_at, Bt.5141.1.S2_at, Bt.9756.1.S1_at, Bt.9797.1.S1_at, Bt.10146.1.S1_at, Bt.10146.2.S1_at, Bt.20263.1.S1_at, Bt.16064.1.S1_a_at, Bt.8306.1.S1_at, Bt.9643.1.S1_at, Bt.2964.1.S1_at, Bt.20931.1.S1_at, Bt.5134.1.S1_at, Bt.4434.1.A1_at, Bt.21675.1.S1_at, Bt.8624.1.S1_at, Bt.27020.1.A1_at, Bt.12831.1.S1_at, Bt.27347.1.A1_at, Bt.265.1.S1_at, Bt.12559.1.S1_a…
Category	Term	Count	%	PValue	Genes	Bonferroni	Benjamini	FDR
SP_PIR_KEYWORDS	metal-binding	45	0.0515	0.527943	Bt.4748.1.S1_at, Bt.4360.1.S1_at, Bt.5141.1.S1_at, Bt.5141.1.S2_at, Bt.9756.1.S1_at, Bt.9797.1.S1_at, Bt.10146.1.S1_at, Bt.10146.2.S1_at, Bt.20263.1.S1_at, Bt.16064.1.S1_a_at, Bt.8306.1.S1_at, Bt.9643.1.S1_at, Bt.2964.1.S1_at, Bt.20931.1.S1_at, Bt.5134.1.S1_at, Bt.4434.1.A1_at, Bt.21675.1.S1_at, Bt.8624.1.S1_at, Bt.27020.1.A1_at, Bt.12831.1.S1_at, Bt.27347.1.A1_at, Bt.265.1.S1_at, Bt.12559.1.S1_a…	1	0.996613	99.9989
GOTERM_MF_ALL	GO:0046872~metal ion binding	115	0.1317	0.817846	Bt.1990.1.S1_at, Bt.5609.3.A1_a_at, Bt.5609.1.A1_a_at, Bt.4748.1.S1_at, Bt.9657.1.S1_at, Bt.442.1.S1_at, Bt.2311.1.S1_at, Bt.4314.1.S1_at, Bt.9797.1.S1_at, Bt.6465.1.S1_at, Bt.7194.1.S1_at, Bt.8306.1.S1_at, Bt.9643.1.S1_at, Bt.4540.1.S1_at, Bt.7641.2.S1_a_at, Bt.7641.1.S1_at, Bt.12896.1.S1_at, Bt.16441.1.A1_at, Bt.12559.1.S1_at, Bt.6404.1.S1_at, Bt.24676.2.A1_at, Bt.2723.1.A1_at, Bt.26339.1.A1_at…	1	1	100
GOTERM_MF_ALL	GO:0043167~ion binding	116	0.1329	0.860856	Bt.1990.1.S1_at, Bt.5609.3.A1_a_at, Bt.5609.1.A1_a_at, Bt.4748.1.S1_at, Bt.9657.1.S1_at, Bt.442.1.S1_at, Bt.2311.1.S1_at, Bt.4314.1.S1_at, Bt.9797.1.S1_at, Bt.6465.1.S1_at, Bt.7194.1.S1_at, Bt.8306.1.S1_at, Bt.9643.1.S1_at, Bt.4540.1.S1_at, Bt.7641.2.S1_a_at, Bt.7641.1.S1_at, Bt.12896.1.S1_at, Bt.16441.1.A1_at, Bt.12559.1.S1_at, Bt.5131.1.S1_at, Bt.6404.1.S1_at, Bt.24676.2.A1_at, Bt.2723.1.A1_at,…	1	1	100
GOTERM_MF_ALL	GO:0043169~cation binding	101	0.1157	0.951948	Bt.5609.3.A1_a_at, Bt.5609.1.A1_a_at, Bt.4748.1.S1_at, Bt.9657.1.S1_at, Bt.9797.1.S1_at, Bt.4314.1.S1_at, Bt.2311.1.S1_at, Bt.6465.1.S1_at, Bt.8306.1.S1_at, Bt.9643.1.S1_at, Bt.7641.2.S1_a_at, Bt.7641.1.S1_at, Bt.12896.1.S1_at, Bt.16441.1.A1_at, Bt.5131.1.S1_at, Bt.6404.1.S1_at, Bt.2723.1.A1_at, Bt.1338.1.A1_at, Bt.13036.1.S1_at, Bt.23205.1.S1_s_at, Bt.621.1.S1_at, Bt.5478.1.S1_at, Bt.20533.1.S1_…	1	1	100
GOTERM_MF_ALL	GO:0046914~transition metal ion binding	67	0.0767	0.980901	Bt.20296.1.S1_at, Bt.4748.1.S1_at, Bt.4360.1.S1_at, Bt.9657.1.S1_at, Bt.2311.1.S1_at, Bt.9797.1.S1_at, Bt.6465.1.S1_at, Bt.10146.1.S1_at, Bt.10146.2.S1_at, Bt.20263.1.S1_at, Bt.8306.1.S1_at, Bt.7151.1.S1_at, Bt.9168.1.A1_at, Bt.21675.1.S1_at, Bt.7641.2.S1_a_at, Bt.7641.1.S1_at, Bt.27020.1.A1_at, Bt.6404.1.S1_at, Bt.2723.1.A1_at, Bt.1338.1.A1_at, Bt.28729.1.A1_at, Bt.13036.1.S1_at, Bt.621.1.S1_at,…	1	1	100
GOTERM_MF_ALL	GO:0008270~zinc ion binding	39	0.0447	0.999943	Bt.4606.1.S1_at, Bt.24522.3.S1_a_at, Bt.12613.1.S1_at, Bt.4606.2.S1_at, Bt.2311.1.S1_at, Bt.9797.1.S1_at, Bt.10146.1.S1_at, Bt.10146.2.S1_at, Bt.20263.1.S1_at, Bt.16064.1.S1_a_at, Bt.3852.1.S1_at, Bt.14010.1.S1_at, Bt.8306.1.S1_at, Bt.7151.1.S1_at, Bt.2964.1.S1_at, Bt.9168.1.A1_at, Bt.7641.2.S1_a_at, Bt.7641.1.S1_at, Bt.27020.1.A1_at, Bt.10154.1.S1_at, Bt.12831.1.S1_at, Bt.6578.1.A1_a_at, Bt.6404…	1	1	100
Functional Group 124	Median: 0.9217840400518489	Geo: 0.8678975082728099	Bt.4748.1.S1_at, Bt.2573.1.S1_at, Bt.12429.1.S1_at, Bt.4314.1.S1_at, Bt.13220.1.S1_at, Bt.20275.1.S1_at, Bt.4557.1.S1_at, Bt.8306.1.S1_at, Bt.1794.1.S1_a_at, Bt.6438.1.A1_at, Bt.3050.1.S1_at, Bt.222.1.S1_at, Bt.4791.1.S1_at, Bt.3080.1.S1_a_at, Bt.19676.2.S1_a_at, Bt.5024.1.S1_at, Bt.23179.1.S1_at, Bt.23179.1.S2_at, Bt.19709.1.S1_at, Bt.7236.1.S1_at, Bt.234.1.S1_at, Bt.29570.1.S1_at, Bt.26339.1.A1…
Category	Term	Count	%	PValue	Genes	Bonferroni	Benjamini	FDR
GOTERM_BP_ALL	GO:0065007~biological regulation	108	0.1237	0.564545	Bt.4748.1.S1_at, Bt.2573.1.S1_at, Bt.12429.1.S1_at, Bt.4314.1.S1_at, Bt.13220.1.S1_at, Bt.20275.1.S1_at, Bt.4557.1.S1_at, Bt.8306.1.S1_at, Bt.1794.1.S1_a_at, Bt.6438.1.A1_at, Bt.3050.1.S1_at, Bt.222.1.S1_at, Bt.4791.1.S1_at, Bt.3080.1.S1_a_at, Bt.19676.2.S1_a_at, Bt.5024.1.S1_at, Bt.23179.1.S1_at, Bt.23179.1.S2_at, Bt.19709.1.S1_at, Bt.7236.1.S1_at, Bt.234.1.S1_at, Bt.29570.1.S1_at, Bt.26339.1.A1…	1	0.999736	100
GOTERM_BP_ALL	GO:0016070~RNA metabolic process	62	0.071	0.680855	Bt.4748.1.S1_at, Bt.12429.1.S1_at, Bt.24459.2.S1_at, Bt.13220.1.S1_at, Bt.19522.1.S1_at, Bt.23170.1.S1_at, Bt.21871.1.S1_a_at, Bt.16132.2.S1_a_at, Bt.8306.1.S1_at, Bt.9168.1.A1_at, Bt.4791.1.S1_at, Bt.19676.2.S1_a_at, Bt.27020.1.A1_at, Bt.19709.1.S1_at, Bt.15267.1.A1_at, Bt.6805.1.A1_at, Bt.26339.1.A1_at, Bt.10299.1.S1_at, Bt.13046.1.S1_at, Bt.13046.1.A1_at, Bt.13036.1.S1_at, Bt.23827.1.A1_at, Bt…	1	0.999971	100
GOTERM_BP_ALL	GO:0006139~nucleobase, nucleoside, nucleotide and nucleic acid metabolic process	98	0.1123	0.733076	Bt.1990.1.S1_at, Bt.4748.1.S1_at, Bt.12429.1.S1_at, Bt.442.1.S1_at, Bt.13220.1.S1_at, Bt.21871.1.S1_a_at, Bt.23170.1.S1_at, Bt.7194.1.S1_at, Bt.8306.1.S1_at, Bt.404.1.S1_at, Bt.4540.1.S1_at, Bt.4791.1.S1_at, Bt.19676.2.S1_a_at, Bt.19709.1.S1_at, Bt.15267.1.A1_at, Bt.5510.1.S1_at, Bt.10299.1.S1_at, Bt.26339.1.A1_at, Bt.13036.1.S1_at, Bt.18533.1.S1_at, Bt.9750.1.S1_a_at, Bt.4834.1.S1_at, Bt.13437.1…	1	0.99999	100
SP_PIR_KEYWORDS	Transcription regulation	15	0.0172	0.73559	Bt.10299.1.S1_at, Bt.20595.2.S1_at, Bt.13046.1.S1_at, Bt.13046.1.A1_at, Bt.13036.1.S1_at, Bt.1747.1.S1_at, Bt.8306.1.S1_at, Bt.5332.1.S1_at, Bt.18808.1.S1_at, Bt.28699.1.S1_at, Bt.9889.1.S1_at, Bt.4822.1.A1_at, Bt.6441.1.S1_at, Bt.19676.2.S1_a_at, Bt.24887.1.S1_at, Bt.4641.1.S1_at,	1	0.999711	100
SP_PIR_KEYWORDS	Transcription	16	0.0183	0.745157	Bt.10299.1.S1_at, Bt.20595.2.S1_at, Bt.13046.1.S1_at, Bt.13046.1.A1_at, Bt.13036.1.S1_at, Bt.1747.1.S1_at, Bt.8306.1.S1_at, Bt.7785.1.S1_at, Bt.5332.1.S1_at, Bt.18808.1.S1_at, Bt.28699.1.S1_at, Bt.9889.1.S1_at, Bt.4822.1.A1_at, Bt.6441.1.S1_at, Bt.19676.2.S1_a_at, Bt.24887.1.S1_at, Bt.4641.1.S1_at,	1	0.999735	100
GOTERM_BP_ALL	GO:0050789~regulation of biological process	91	0.1042	0.80774	Bt.2573.1.S1_at, Bt.4748.1.S1_at, Bt.12429.1.S1_at, Bt.13220.1.S1_at, Bt.19522.1.S1_at, Bt.4314.1.S1_at, Bt.58.1.S1_at, Bt.20275.1.S1_at, Bt.16132.2.S1_a_at, Bt.8306.1.S1_at, Bt.1794.1.S1_a_at, Bt.21766.2.S1_at, Bt.6438.1.A1_at, Bt.9168.1.A1_at, Bt.222.1.S1_at, Bt.12138.1.S1_at, Bt.4791.1.S1_at, Bt.4476.1.S1_at, Bt.19676.2.S1_a_at, Bt.9603.1.A1_at, Bt.9603.2.S1_at, Bt.27020.1.A1_at, Bt.23179.1.S1…	1	0.999999	100
SP_PIR_KEYWORDS	dna-binding	18	0.0206	0.887597	Bt.19709.1.S1_at, Bt.5197.2.S1_at, Bt.4294.1.S1_at, Bt.2899.1.S1_at, Bt.2899.1.S2_at, Bt.13036.1.S1_at, Bt.8306.1.S1_at, Bt.1747.1.S1_at, Bt.21523.1.S1_at, Bt.7471.1.S1_at, Bt.5388.1.S1_s_at, Bt.5388.1.S1_at, Bt.5089.1.S2_at, Bt.7785.1.S1_at, Bt.21491.1.S1_at, Bt.5332.1.S1_at, Bt.18808.1.S1_at, Bt.9889.1.S1_at, Bt.24887.1.S1_at, Bt.742.1.S2_at, Bt.4641.1.S1_at,	1	0.999992	100
GOTERM_BP_ALL	GO:0019222~regulation of metabolic process	55	0.063	0.891754	Bt.4748.1.S1_at, Bt.12429.1.S1_at, Bt.19522.1.S1_at, Bt.13220.1.S1_at, Bt.20275.1.S1_at, Bt.16132.2.S1_a_at, Bt.8306.1.S1_at, Bt.9168.1.A1_at, Bt.12138.1.S1_at, Bt.4791.1.S1_at, Bt.4476.1.S1_at, Bt.19676.2.S1_a_at, Bt.27020.1.A1_at, Bt.23179.1.S1_at, Bt.23179.1.S2_at, Bt.19709.1.S1_at, Bt.1148.1.S1_at, Bt.26339.1.A1_at, Bt.10299.1.S1_at, Bt.13046.1.S1_at, Bt.13046.1.A1_at, Bt.13036.1.S1_at, Bt.17…	1	1	100
GOTERM_BP_ALL	GO:0050794~regulation of cellular process	80	0.0916	0.909899	Bt.4748.1.S1_at, Bt.2573.1.S1_at, Bt.12429.1.S1_at, Bt.13220.1.S1_at, Bt.19522.1.S1_at, Bt.58.1.S1_at, Bt.20275.1.S1_at, Bt.16132.2.S1_a_at, Bt.8306.1.S1_at, Bt.1794.1.S1_a_at, Bt.21766.2.S1_at, Bt.6438.1.A1_at, Bt.9168.1.A1_at, Bt.222.1.S1_at, Bt.12138.1.S1_at, Bt.4791.1.S1_at, Bt.4476.1.S1_at, Bt.19676.2.S1_a_at, Bt.9603.1.A1_at, Bt.9603.2.S1_at, Bt.27020.1.A1_at, Bt.7236.1.S1_at, Bt.19709.1.S1…	1	1	100
GOTERM_BP_ALL	GO:0010468~regulation of gene expression	50	0.0573	0.921784	Bt.4748.1.S1_at, Bt.12429.1.S1_at, Bt.19522.1.S1_at, Bt.13220.1.S1_at, Bt.16132.2.S1_a_at, Bt.8306.1.S1_at, Bt.9168.1.A1_at, Bt.12138.1.S1_at, Bt.4791.1.S1_at, Bt.4476.1.S1_at, Bt.19676.2.S1_a_at, Bt.27020.1.A1_at, Bt.19709.1.S1_at, Bt.1148.1.S1_at, Bt.10299.1.S1_at, Bt.26339.1.A1_at, Bt.13046.1.S1_at, Bt.13046.1.A1_at, Bt.13036.1.S1_at, Bt.1747.1.S1_at, Bt.5495.1.S1_at, Bt.5389.1.S1_at, Bt.18533…	1	1	100
GOTERM_BP_ALL	GO:0031323~regulation of cellular metabolic process	51	0.0584	0.933928	Bt.4748.1.S1_at, Bt.12429.1.S1_at, Bt.19522.1.S1_at, Bt.13220.1.S1_at, Bt.16132.2.S1_a_at, Bt.8306.1.S1_at, Bt.9168.1.A1_at, Bt.12138.1.S1_at, Bt.4791.1.S1_at, Bt.4476.1.S1_at, Bt.19676.2.S1_a_at, Bt.27020.1.A1_at, Bt.19709.1.S1_at, Bt.1148.1.S1_at, Bt.10299.1.S1_at, Bt.26339.1.A1_at, Bt.13046.1.S1_at, Bt.13046.1.A1_at, Bt.13036.1.S1_at, Bt.1747.1.S1_at, Bt.5495.1.S1_at, Bt.5389.1.S1_at, Bt.18533…	1	1	100
GOTERM_BP_ALL	GO:0006350~transcription	47	0.0538	0.957458	Bt.4748.1.S1_at, Bt.12429.1.S1_at, Bt.12273.1.S1_at, Bt.13220.1.S1_at, Bt.19522.1.S1_at, Bt.16132.2.S1_a_at, Bt.8306.1.S1_at, Bt.21766.2.S1_at, Bt.7785.1.S1_at, Bt.4619.1.S1_at, Bt.9168.1.A1_at, Bt.5332.1.S1_at, Bt.12138.1.S1_at, Bt.4791.1.S1_at, Bt.4822.1.A1_at, Bt.6441.1.S1_at, Bt.4476.1.S1_at, Bt.19676.2.S1_a_at, Bt.21433.2.S1_at, Bt.27020.1.A1_at, Bt.742.1.S2_at, Bt.19709.1.S1_at, Bt.5657.1.A…	1	1	100
GOTERM_BP_ALL	GO:0006355~regulation of transcription, DNA-dependent	37	0.0424	0.978792	Bt.4748.1.S1_at, Bt.12429.1.S1_at, Bt.13220.1.S1_at, Bt.19522.1.S1_at, Bt.16132.2.S1_a_at, Bt.8306.1.S1_at, Bt.9168.1.A1_at, Bt.5332.1.S1_at, Bt.4791.1.S1_at, Bt.4822.1.A1_at, Bt.6441.1.S1_at, Bt.19676.2.S1_a_at, Bt.21433.2.S1_at, Bt.27020.1.A1_at, Bt.742.1.S2_at, Bt.19709.1.S1_at, Bt.5657.1.A1_at, Bt.24579.1.S1_at, Bt.26339.1.A1_at, Bt.10299.1.S1_at, Bt.2899.1.S1_at, Bt.2899.1.S2_at, Bt.20595.2.…	1	1	100
GOTERM_BP_ALL	GO:0006351~transcription, DNA-dependent	37	0.0424	0.983907	Bt.4748.1.S1_at, Bt.12429.1.S1_at, Bt.13220.1.S1_at, Bt.19522.1.S1_at, Bt.16132.2.S1_a_at, Bt.8306.1.S1_at, Bt.9168.1.A1_at, Bt.5332.1.S1_at, Bt.4791.1.S1_at, Bt.4822.1.A1_at, Bt.6441.1.S1_at, Bt.19676.2.S1_a_at, Bt.21433.2.S1_at, Bt.27020.1.A1_at, Bt.742.1.S2_at, Bt.19709.1.S1_at, Bt.5657.1.A1_at, Bt.24579.1.S1_at, Bt.26339.1.A1_at, Bt.10299.1.S1_at, Bt.2899.1.S1_at, Bt.2899.1.S2_at, Bt.20595.2.…	1	1	100
GOTERM_BP_ALL	GO:0032774~RNA biosynthetic process	37	0.0424	0.984709	Bt.4748.1.S1_at, Bt.12429.1.S1_at, Bt.13220.1.S1_at, Bt.19522.1.S1_at, Bt.16132.2.S1_a_at, Bt.8306.1.S1_at, Bt.9168.1.A1_at, Bt.5332.1.S1_at, Bt.4791.1.S1_at, Bt.4822.1.A1_at, Bt.6441.1.S1_at, Bt.19676.2.S1_a_at, Bt.21433.2.S1_at, Bt.27020.1.A1_at, Bt.742.1.S2_at, Bt.19709.1.S1_at, Bt.5657.1.A1_at, Bt.24579.1.S1_at, Bt.26339.1.A1_at, Bt.10299.1.S1_at, Bt.2899.1.S1_at, Bt.2899.1.S2_at, Bt.20595.2.…	1	1	100
GOTERM_BP_ALL	GO:0045449~regulation of transcription	42	0.0481	0.986105	Bt.4748.1.S1_at, Bt.12429.1.S1_at, Bt.13220.1.S1_at, Bt.19522.1.S1_at, Bt.16132.2.S1_a_at, Bt.8306.1.S1_at, Bt.4619.1.S1_at, Bt.9168.1.A1_at, Bt.5332.1.S1_at, Bt.12138.1.S1_at, Bt.4791.1.S1_at, Bt.4822.1.A1_at, Bt.6441.1.S1_at, Bt.4476.1.S1_at, Bt.19676.2.S1_a_at, Bt.21433.2.S1_at, Bt.27020.1.A1_at, Bt.742.1.S2_at, Bt.19709.1.S1_at, Bt.5657.1.A1_at, Bt.24579.1.S1_at, Bt.4294.1.S1_at, Bt.26339.1.A…	1	1	100
GOTERM_BP_ALL	GO:0019219~regulation of nucleobase, nucleoside, nucleotide and nucleic acid metabolic process	42	0.0481	0.990485	Bt.4748.1.S1_at, Bt.12429.1.S1_at, Bt.13220.1.S1_at, Bt.19522.1.S1_at, Bt.16132.2.S1_a_at, Bt.8306.1.S1_at, Bt.4619.1.S1_at, Bt.9168.1.A1_at, Bt.5332.1.S1_at, Bt.12138.1.S1_at, Bt.4791.1.S1_at, Bt.4822.1.A1_at, Bt.6441.1.S1_at, Bt.4476.1.S1_at, Bt.19676.2.S1_a_at, Bt.21433.2.S1_at, Bt.27020.1.A1_at, Bt.742.1.S2_at, Bt.19709.1.S1_at, Bt.5657.1.A1_at, Bt.24579.1.S1_at, Bt.4294.1.S1_at, Bt.26339.1.A…	1	1	100
GOTERM_MF_ALL	GO:0030528~transcription regulator activity	20	0.0229	0.992104	Bt.19709.1.S1_at, Bt.5657.1.A1_at, Bt.24579.1.S1_at, Bt.1302.1.S1_at, Bt.13220.1.S1_at, Bt.4294.1.S1_at, Bt.2899.1.S1_at, Bt.2899.1.S2_at, Bt.13046.1.S1_at, Bt.13046.1.A1_at, Bt.13036.1.S1_at, Bt.8306.1.S1_at, Bt.1747.1.S1_at, Bt.9153.1.S1_at, Bt.13134.1.A1_at, Bt.13134.1.S1_at, Bt.18533.1.S1_at, Bt.7785.1.S1_at, Bt.9168.1.A1_at, Bt.12138.1.S1_at, Bt.18808.1.S1_at, Bt.7781.1.S1_at, Bt.24887.1.S1_…	1	1	100
GOTERM_MF_ALL	GO:0003677~DNA binding	39	0.0447	0.99551	Bt.12429.1.S1_at, Bt.12273.1.S1_at, Bt.13220.1.S1_at, Bt.23098.2.S1_at, Bt.8306.1.S1_at, Bt.7471.1.S1_at, Bt.21766.2.S1_at, Bt.7785.1.S1_at, Bt.8333.1.S1_at, Bt.9168.1.A1_at, Bt.5332.1.S1_at, Bt.12138.1.S1_at, Bt.6986.1.A1_at, Bt.3049.1.A1_at, Bt.4791.1.S1_at, Bt.21433.2.S1_at, Bt.27020.1.A1_at, Bt.742.1.S2_at, Bt.19709.1.S1_at, Bt.5657.1.A1_at, Bt.5197.2.S1_at, Bt.1302.1.S1_at, Bt.2899.1.S1_at, …	1	1	100
Functional Group 125	Median: 0.9963304253707638	Geo: 0.8859802054519154	Bt.5269.1.S1_at, Bt.5269.2.S1_at, Bt.22487.1.S1_at, Bt.22487.2.A1_a_at, Bt.22487.2.A1_at, Bt.4762.1.S1_at, Bt.2575.1.S1_at, Bt.5478.1.S1_at, Bt.22840.1.S1_a_at, Bt.234.1.S1_at, Bt.4775.1.S1_at,
Category	Term	Count	%	PValue	Genes	Bonferroni	Benjamini	FDR
GOTERM_BP_ALL	GO:0002474~antigen processing and presentation of peptide antigen via MHC class I	3	0.0034	0.602182	Bt.5269.1.S1_at, Bt.5269.2.S1_at, Bt.22487.1.S1_at, Bt.22487.2.A1_a_at, Bt.22487.2.A1_at, Bt.4762.1.S1_at,	1	0.999873	100
GOTERM_BP_ALL	GO:0048002~antigen processing and presentation of peptide antigen	3	0.0034	0.620874	Bt.5269.1.S1_at, Bt.5269.2.S1_at, Bt.22487.1.S1_at, Bt.22487.2.A1_a_at, Bt.22487.2.A1_at, Bt.4762.1.S1_at,	1	0.999912	100
GOTERM_CC_ALL	GO:0042612~MHC class I protein complex	3	0.0034	0.932757	Bt.5269.1.S1_at, Bt.5269.2.S1_at, Bt.22487.1.S1_at, Bt.22487.2.A1_a_at, Bt.22487.2.A1_at, Bt.4762.1.S1_at,	1	0.999958	100
SMART	SM00407:IGc1	3	0.0034	0.972754	Bt.5269.1.S1_at, Bt.5269.2.S1_at, Bt.22487.1.S1_at, Bt.22487.2.A1_a_at, Bt.22487.2.A1_at, Bt.4762.1.S1_at,	1	1	100
INTERPRO	IPR003006:Immunoglobulin/major histocompatibility complex motif	3	0.0034	0.99633	Bt.5269.1.S1_at, Bt.5269.2.S1_at, Bt.22487.1.S1_at, Bt.22487.2.A1_a_at, Bt.22487.2.A1_at, Bt.4762.1.S1_at,	1	1	100
INTERPRO	IPR003597:Immunoglobulin C1-set	3	0.0034	0.99633	Bt.5269.1.S1_at, Bt.5269.2.S1_at, Bt.22487.1.S1_at, Bt.22487.2.A1_a_at, Bt.22487.2.A1_at, Bt.4762.1.S1_at,	1	1	100
GOTERM_BP_ALL	GO:0019882~antigen processing and presentation	4	0.0046	0.999097	Bt.5269.1.S1_at, Bt.5269.2.S1_at, Bt.22487.1.S1_at, Bt.22487.2.A1_a_at, Bt.22487.2.A1_at, Bt.4762.1.S1_at, Bt.2575.1.S1_at,	1	1	100
GOTERM_CC_ALL	GO:0042611~MHC protein complex	3	0.0034	0.99978	Bt.5269.1.S1_at, Bt.5269.2.S1_at, Bt.22487.1.S1_at, Bt.22487.2.A1_a_at, Bt.22487.2.A1_at, Bt.4762.1.S1_at,	1	1	100
GOTERM_BP_ALL	GO:0006955~immune response	7	0.008	0.999988	Bt.5269.1.S1_at, Bt.5269.2.S1_at, Bt.5478.1.S1_at, Bt.22840.1.S1_a_at, Bt.22487.1.S1_at, Bt.22487.2.A1_a_at, Bt.22487.2.A1_at, Bt.234.1.S1_at, Bt.4775.1.S1_at, Bt.4762.1.S1_at,	1	1	100
Functional Group 126	Median: 0.9998870247763282	Geo: 0.9435051221936195	Bt.2573.1.S1_at, Bt.4360.1.S1_at, Bt.5141.1.S1_at, Bt.5141.1.S2_at, Bt.2626.1.S1_at, Bt.77.1.S1_at, Bt.499.1.S1_a_at, Bt.4557.1.S1_at, Bt.2582.1.S1_at, Bt.28224.1.A1_at, Bt.12761.1.A1_at, Bt.5107.1.S1_at, Bt.5434.1.S1_at, Bt.4679.1.S1_at, Bt.126.1.S2_at, Bt.5134.1.S1_at, Bt.4434.1.A1_at, Bt.13744.1.A1_at, Bt.21137.2.S1_at, Bt.21137.1.S1_at, Bt.24343.1.A1_at, Bt.10880.1.S1_at, Bt.27347.1.A1_at, Bt…
Category	Term	Count	%	PValue	Genes	Bonferroni	Benjamini	FDR
UP_SEQ_FEATURE	transmembrane region	43	0.0493	0.709049	Bt.2573.1.S1_at, Bt.4360.1.S1_at, Bt.5141.1.S1_at, Bt.5141.1.S2_at, Bt.2626.1.S1_at, Bt.77.1.S1_at, Bt.499.1.S1_a_at, Bt.4557.1.S1_at, Bt.2582.1.S1_at, Bt.28224.1.A1_at, Bt.12761.1.A1_at, Bt.5107.1.S1_at, Bt.5434.1.S1_at, Bt.4679.1.S1_at, Bt.126.1.S2_at, Bt.5134.1.S1_at, Bt.4434.1.A1_at, Bt.13744.1.A1_at, Bt.21137.2.S1_at, Bt.21137.1.S1_at, Bt.24343.1.A1_at, Bt.10880.1.S1_at, Bt.27347.1.A1_at, Bt…	1	1	100
UP_SEQ_FEATURE	topological domain:Extracellular	25	0.0286	0.892365	Bt.2573.1.S1_at, Bt.2626.1.S1_at, Bt.4557.1.S1_at, Bt.499.1.S1_a_at, Bt.12761.1.A1_at, Bt.5107.1.S1_at, Bt.4679.1.S1_at, Bt.126.1.S2_at, Bt.13744.1.A1_at, Bt.21137.2.S1_at, Bt.21137.1.S1_at, Bt.24343.1.A1_at, Bt.27347.1.A1_at, Bt.557.1.S1_at, Bt.23659.1.S1_at, Bt.9026.1.S1_at, Bt.4768.1.S2_at, Bt.4107.1.S1_at, Bt.4695.1.S1_at, Bt.236.1.S1_at, Bt.6074.1.S1_at, Bt.26992.1.A1_at, Bt.8131.1.S1_at, Bt…	1	1	100
UP_SEQ_FEATURE	topological domain:Cytoplasmic	30	0.0344	0.937605	Bt.2573.1.S1_at, Bt.4360.1.S1_at, Bt.5141.1.S1_at, Bt.5141.1.S2_at, Bt.2626.1.S1_at, Bt.499.1.S1_a_at, Bt.4557.1.S1_at, Bt.2582.1.S1_at, Bt.28224.1.A1_at, Bt.12761.1.A1_at, Bt.5107.1.S1_at, Bt.4679.1.S1_at, Bt.126.1.S2_at, Bt.13744.1.A1_at, Bt.21137.2.S1_at, Bt.21137.1.S1_at, Bt.24343.1.A1_at, Bt.27347.1.A1_at, Bt.9026.1.S1_at, Bt.557.1.S1_at, Bt.23659.1.S1_at, Bt.4768.1.S2_at, Bt.23205.1.S1_s_at…	1	1	100
SP_PIR_KEYWORDS	glycoprotein	53	0.0607	0.998891	Bt.2573.1.S1_at, Bt.2626.1.S1_at, Bt.15698.1.S1_at, Bt.4557.1.S1_at, Bt.1794.1.S1_a_at, Bt.6438.1.A1_at, Bt.4679.1.S1_at, Bt.222.1.S1_at, Bt.24931.1.A1_at, Bt.19709.1.S1_at, Bt.557.1.S1_at, Bt.23659.1.S1_at, Bt.2712.1.S1_at, Bt.4138.1.S1_a_at, Bt.982.1.S1_at, Bt.982.1.S1_a_at, Bt.4768.1.S2_at, Bt.23205.1.S1_s_at, Bt.8131.1.S1_at, Bt.3562.1.S1_at, Bt.4627.1.S1_at, Bt.20852.1.A1_at, Bt.13553.2.S1_a…	1	1	100
UP_SEQ_FEATURE	disulfide bond	38	0.0435	0.999887	Bt.20455.1.S1_at, Bt.5141.1.S1_at, Bt.5141.1.S2_at, Bt.2626.1.S1_at, Bt.571.1.S1_at, Bt.18325.1.A1_at, Bt.18325.2.A1_a_at, Bt.499.1.S1_a_at, Bt.4557.1.S1_at, Bt.75.1.S1_at, Bt.2582.1.S1_at, Bt.28224.1.A1_at, Bt.12761.1.A1_at, Bt.5107.1.S1_at, Bt.28686.2.S1_at, Bt.7134.1.S2_at, Bt.1794.1.S1_a_at, Bt.6438.1.A1_at, Bt.583.1.S1_a_at, Bt.4679.1.S1_at, Bt.13744.1.A1_at, Bt.21223.2.S1_at, Bt.21137.2.S1_…	1	1	100
SP_PIR_KEYWORDS	signal	43	0.0493	0.99999	Bt.12144.2.S1_a_at, Bt.2626.1.S1_at, Bt.571.1.S1_at, Bt.18325.1.A1_at, Bt.18325.2.A1_a_at, Bt.15698.1.S1_at, Bt.499.1.S1_a_at, Bt.4557.1.S1_at, Bt.4762.1.S1_at, Bt.12761.1.A1_at, Bt.3215.1.S1_at, Bt.5107.1.S1_at, Bt.28686.2.S1_at, Bt.11241.1.S1_at, Bt.13021.1.S1_at, Bt.1794.1.S1_a_at, Bt.279.1.S1_at, Bt.6438.1.A1_at, Bt.583.1.S1_a_at, Bt.10236.1.S1_at, Bt.4679.1.S1_at, Bt.2632.1.S1_at, Bt.9972.1.…	1	1	100
UP_SEQ_FEATURE	glycosylation site:N-linked (GlcNAc...)	32	0.0367	0.99999	Bt.2573.1.S1_at, Bt.5141.1.S1_at, Bt.5141.1.S2_at, Bt.2626.1.S1_at, Bt.499.1.S1_a_at, Bt.4557.1.S1_at, Bt.2582.1.S1_at, Bt.28224.1.A1_at, Bt.12761.1.A1_at, Bt.5107.1.S1_at, Bt.28686.2.S1_at, Bt.1794.1.S1_a_at, Bt.6438.1.A1_at, Bt.4679.1.S1_at, Bt.2632.1.S1_at, Bt.13744.1.A1_at, Bt.21137.2.S1_at, Bt.21137.1.S1_at, Bt.23268.1.S1_at, Bt.557.1.S1_at, Bt.23659.1.S1_at, Bt.4138.1.S1_a_at, Bt.982.1.S1_a…	1	1	100
SP_PIR_KEYWORDS	Secreted	24	0.0275	0.999999	Bt.224.1.S1_at, Bt.5269.1.S1_at, Bt.5269.2.S1_at, Bt.23268.1.S1_at, Bt.12144.2.S1_a_at, Bt.5141.1.S1_at, Bt.5141.1.S2_at, Bt.571.1.S1_at, Bt.4314.1.S1_at, Bt.234.1.S1_at, Bt.18325.1.A1_at, Bt.18325.2.A1_a_at, Bt.2712.1.S1_at, Bt.4138.1.S1_a_at, Bt.2582.1.S1_at, Bt.28224.1.A1_at, Bt.982.1.S1_at, Bt.982.1.S1_a_at, Bt.2498.2.A1_a_at, Bt.4695.1.S1_at, Bt.1794.1.S1_a_at, Bt.279.1.S1_at, Bt.6438.1.A1_a…	1	1	100
UP_SEQ_FEATURE	signal peptide	33	0.0378	1	Bt.12144.2.S1_a_at, Bt.2626.1.S1_at, Bt.571.1.S1_at, Bt.18325.1.A1_at, Bt.18325.2.A1_a_at, Bt.499.1.S1_a_at, Bt.4557.1.S1_at, Bt.12761.1.A1_at, Bt.4762.1.S1_at, Bt.5107.1.S1_at, Bt.28686.2.S1_at, Bt.1794.1.S1_a_at, Bt.6438.1.A1_at, Bt.583.1.S1_a_at, Bt.10236.1.S1_at, Bt.4679.1.S1_at, Bt.2632.1.S1_at, Bt.13744.1.A1_at, Bt.21223.2.S1_at, Bt.3080.1.S1_a_at, Bt.224.1.S1_at, Bt.5269.1.S1_at, Bt.5269.2…	1	1	100
Functional Group 127	Median: 0.9999999999999875	Geo: 0.9728354103445607	Bt.27901.1.S1_at, Bt.19522.1.S1_at, Bt.58.1.S1_at, Bt.10831.1.S1_at, Bt.499.1.S1_a_at, Bt.3137.1.S1_at, Bt.868.1.S1_a_at, Bt.177.1.S1_at, Bt.2949.1.S1_at, Bt.26751.1.S1_at, Bt.28064.2.S1_at, Bt.9929.1.A1_at, Bt.19517.1.S1_at, Bt.504.1.S1_at, Bt.4549.1.S1_at, Bt.7236.1.S1_at, Bt.21708.1.S1_at, Bt.24676.2.A1_at, Bt.461.1.S1_at, Bt.26339.1.A1_at, Bt.21170.1.A1_at, Bt.4691.1.S1_at, Bt.927.1.S1_at, Bt…
Category	Term	Count	%	PValue	Genes	Bonferroni	Benjamini	FDR
GOTERM_BP_ALL	GO:0007242~intracellular signaling cascade	27	0.0309	0.9207	Bt.27901.1.S1_at, Bt.19522.1.S1_at, Bt.58.1.S1_at, Bt.10831.1.S1_at, Bt.499.1.S1_a_at, Bt.3137.1.S1_at, Bt.868.1.S1_a_at, Bt.177.1.S1_at, Bt.2949.1.S1_at, Bt.26751.1.S1_at, Bt.28064.2.S1_at, Bt.9929.1.A1_at, Bt.19517.1.S1_at, Bt.504.1.S1_at, Bt.4549.1.S1_at, Bt.7236.1.S1_at, Bt.21708.1.S1_at, Bt.24676.2.A1_at, Bt.461.1.S1_at, Bt.26339.1.A1_at, Bt.21170.1.A1_at, Bt.4691.1.S1_at, Bt.927.1.S1_at, Bt…	1	1	100
GOTERM_BP_ALL	GO:0007154~cell communication	56	0.0641	1	Bt.2573.1.S1_at, Bt.27901.1.S1_at, Bt.13220.1.S1_at, Bt.19522.1.S1_at, Bt.58.1.S1_at, Bt.1.1.S1_at, Bt.868.1.S1_a_at, Bt.117.1.S1_at, Bt.2949.1.S1_at, Bt.1794.1.S1_a_at, Bt.3050.1.S1_at, Bt.28064.2.S1_at, Bt.9929.1.A1_at, Bt.28515.1.A1_at, Bt.29857.1.A1_at, Bt.29857.1.S1_at, Bt.12896.1.S1_at, Bt.7236.1.S1_at, Bt.13118.1.S1_at, Bt.734.1.S1_at, Bt.12067.1.S1_at, Bt.24676.2.A1_at, Bt.26339.1.A1_at, …	1	1	100
GOTERM_BP_ALL	GO:0007165~signal transduction	49	0.0561	1	Bt.27901.1.S1_at, Bt.19522.1.S1_at, Bt.13220.1.S1_at, Bt.58.1.S1_at, Bt.1.1.S1_at, Bt.868.1.S1_a_at, Bt.117.1.S1_at, Bt.2949.1.S1_at, Bt.1794.1.S1_a_at, Bt.28064.2.S1_at, Bt.9929.1.A1_at, Bt.12896.1.S1_at, Bt.28515.1.A1_at, Bt.29857.1.A1_at, Bt.29857.1.S1_at, Bt.7236.1.S1_at, Bt.13118.1.S1_at, Bt.734.1.S1_at, Bt.12067.1.S1_at, Bt.24676.2.A1_at, Bt.26339.1.A1_at, Bt.21170.1.A1_at, Bt.4532.2.S1_at,…	1	1	100
Functional Group 128	Median: 0.9921035004887749	Geo: 0.9852223413958741	Bt.12429.1.S1_at, Bt.9153.1.S1_at, Bt.13134.1.A1_at, Bt.13134.1.S1_at, Bt.19709.1.S1_at, Bt.18533.1.S1_at, Bt.12138.1.S1_at, Bt.2899.1.S1_at, Bt.2899.1.S2_at, Bt.13036.1.S1_at, Bt.24887.1.S1_at, Bt.8306.1.S1_at, Bt.1747.1.S1_at, Bt.5657.1.A1_at, Bt.24579.1.S1_at, Bt.1302.1.S1_at, Bt.13220.1.S1_at, Bt.4294.1.S1_at, Bt.13046.1.S1_at, Bt.13046.1.A1_at, Bt.7785.1.S1_at, Bt.9168.1.A1_at, Bt.18808.1.S1…
Category	Term	Count	%	PValue	Genes	Bonferroni	Benjamini	FDR
GOTERM_MF_ALL	GO:0043565~sequence-specific DNA binding	10	0.0115	0.970296	Bt.12429.1.S1_at, Bt.9153.1.S1_at, Bt.13134.1.A1_at, Bt.13134.1.S1_at, Bt.19709.1.S1_at, Bt.18533.1.S1_at, Bt.12138.1.S1_at, Bt.2899.1.S1_at, Bt.2899.1.S2_at, Bt.13036.1.S1_at, Bt.24887.1.S1_at, Bt.8306.1.S1_at, Bt.1747.1.S1_at,	1	1	100
GOTERM_MF_ALL	GO:0030528~transcription regulator activity	20	0.0229	0.992104	Bt.19709.1.S1_at, Bt.5657.1.A1_at, Bt.24579.1.S1_at, Bt.1302.1.S1_at, Bt.13220.1.S1_at, Bt.4294.1.S1_at, Bt.2899.1.S1_at, Bt.2899.1.S2_at, Bt.13046.1.S1_at, Bt.13046.1.A1_at, Bt.13036.1.S1_at, Bt.8306.1.S1_at, Bt.1747.1.S1_at, Bt.9153.1.S1_at, Bt.13134.1.A1_at, Bt.13134.1.S1_at, Bt.18533.1.S1_at, Bt.7785.1.S1_at, Bt.9168.1.A1_at, Bt.12138.1.S1_at, Bt.18808.1.S1_at, Bt.7781.1.S1_at, Bt.24887.1.S1_…	1	1	100
GOTERM_MF_ALL	GO:0003700~transcription factor activity	13	0.0149	0.993439	Bt.19709.1.S1_at, Bt.5657.1.A1_at, Bt.13220.1.S1_at, Bt.2899.1.S1_at, Bt.2899.1.S2_at, Bt.13036.1.S1_at, Bt.1747.1.S1_at, Bt.8306.1.S1_at, Bt.9153.1.S1_at, Bt.13134.1.A1_at, Bt.13134.1.S1_at, Bt.18533.1.S1_at, Bt.9168.1.A1_at, Bt.12138.1.S1_at, Bt.24887.1.S1_at, Bt.4641.1.S1_at,	1	1	100
Functional Group 129	Median: 0.9994850857623314	Geo: 0.9897704570251471	Bt.29698.1.A1_at, Bt.7236.1.S1_at, Bt.21223.2.S1_at, Bt.4557.1.S1_at, Bt.499.1.S1_a_at, Bt.4641.1.S1_at, Bt.272.1.S1_at, Bt.234.1.S1_at, Bt.13387.1.S1_at, Bt.7157.1.S1_at,
Category	Term	Count	%	PValue	Genes	Bonferroni	Benjamini	FDR
KEGG_PATHWAY	bta04630:Jak-STAT signaling pathway	7	0.008	0.960695	Bt.29698.1.A1_at, Bt.7236.1.S1_at, Bt.21223.2.S1_at, Bt.4557.1.S1_at, Bt.499.1.S1_a_at, Bt.4641.1.S1_at, Bt.272.1.S1_at,	1	0.999885	100
KEGG_PATHWAY	bta04060:Cytokine-cytokine receptor interaction	5	0.0057	0.99897	Bt.29698.1.A1_at, Bt.234.1.S1_at, Bt.21223.2.S1_at, Bt.4557.1.S1_at, Bt.499.1.S1_a_at,	1	1	100
KEGG_PATHWAY	bta04080:Neuroactive ligand-receptor interaction	3	0.0034	1	Bt.29698.1.A1_at, Bt.21223.2.S1_at, Bt.499.1.S1_a_at,	1	1	100
GOTERM_MF_ALL	GO:0004888~transmembrane receptor activity	5	0.0057	1	Bt.29698.1.A1_at, Bt.13387.1.S1_at, Bt.4557.1.S1_at, Bt.499.1.S1_a_at, Bt.7157.1.S1_at,	1	1	100
Functional Group 130	Median: 0.9890989288150894	Geo: 0.9922905663773348	Bt.5397.1.S1_at, Bt.13387.1.S1_at, Bt.4802.1.S1_at, Bt.7780.1.S1_at, Bt.2898.3.S1_at, Bt.621.1.S1_at,
Category	Term	Count	%	PValue	Genes	Bonferroni	Benjamini	FDR
GOTERM_MF_ALL	GO:0008236~serine-type peptidase activity	5	0.0057	0.989099	Bt.5397.1.S1_at, Bt.13387.1.S1_at, Bt.4802.1.S1_at, Bt.7780.1.S1_at, Bt.2898.3.S1_at, Bt.621.1.S1_at,	1	1	100
GOTERM_MF_ALL	GO:0017171~serine hydrolase activity	5	0.0057	0.989099	Bt.5397.1.S1_at, Bt.13387.1.S1_at, Bt.4802.1.S1_at, Bt.7780.1.S1_at, Bt.2898.3.S1_at, Bt.621.1.S1_at,	1	1	100
GOTERM_MF_ALL	GO:0004252~serine-type endopeptidase activity	3	0.0034	0.998705	Bt.13387.1.S1_at, Bt.4802.1.S1_at, Bt.7780.1.S1_at, Bt.621.1.S1_at,	1	1	100
Functional Group 131	Median: 0.9999999999999987	Geo: 0.9998423004036845	Bt.4943.3.S1_a_at, Bt.9026.1.S1_at, Bt.714.1.S1_at, Bt.1518.1.S1_at, Bt.29696.1.A1_at, Bt.29696.1.S1_at, Bt.21540.1.S1_at, Bt.499.1.S1_a_at, Bt.13991.1.A1_at, Bt.13991.2.S1_a_at, Bt.4557.1.S1_at, Bt.12761.1.A1_at, Bt.5107.1.S1_at, Bt.13036.1.S1_at, Bt.13046.1.S1_at, Bt.13046.1.A1_at, Bt.8306.1.S1_at, Bt.29698.1.A1_at, Bt.2981.1.S1_at, Bt.4679.1.S1_at, Bt.9972.1.S1_at, Bt.13744.1.A1_at, Bt.3562.1.…
Category	Term	Count	%	PValue	Genes	Bonferroni	Benjamini	FDR
SP_PIR_KEYWORDS	receptor	22	0.0252	0.999369	Bt.4943.3.S1_a_at, Bt.9026.1.S1_at, Bt.714.1.S1_at, Bt.1518.1.S1_at, Bt.29696.1.A1_at, Bt.29696.1.S1_at, Bt.21540.1.S1_at, Bt.499.1.S1_a_at, Bt.13991.1.A1_at, Bt.13991.2.S1_a_at, Bt.4557.1.S1_at, Bt.12761.1.A1_at, Bt.5107.1.S1_at, Bt.13036.1.S1_at, Bt.13046.1.S1_at, Bt.13046.1.A1_at, Bt.8306.1.S1_at, Bt.29698.1.A1_at, Bt.2981.1.S1_at, Bt.4679.1.S1_at, Bt.9972.1.S1_at, Bt.13744.1.A1_at, Bt.3562.1.…	1	1	100
GOTERM_MF_ALL	GO:0004871~signal transducer activity	31	0.0355	1	Bt.4943.3.S1_a_at, Bt.714.1.S1_at, Bt.1518.1.S1_at, Bt.4557.1.S1_at, Bt.13991.1.A1_at, Bt.13991.2.S1_a_at, Bt.499.1.S1_a_at, Bt.12761.1.A1_at, Bt.5107.1.S1_at, Bt.117.1.S1_at, Bt.8306.1.S1_at, Bt.29698.1.A1_at, Bt.409.1.S1_at, Bt.4679.1.S1_at, Bt.9972.1.S1_at, Bt.13744.1.A1_at, Bt.7157.1.S1_at, Bt.5590.1.S1_at, Bt.800.1.S1_at, Bt.9026.1.S1_at, Bt.10855.1.S1_at, Bt.29696.1.A1_at, Bt.29696.1.S1_at,…	1	1	100
GOTERM_MF_ALL	GO:0060089~molecular transducer activity	31	0.0355	1	Bt.4943.3.S1_a_at, Bt.714.1.S1_at, Bt.1518.1.S1_at, Bt.4557.1.S1_at, Bt.13991.1.A1_at, Bt.13991.2.S1_a_at, Bt.499.1.S1_a_at, Bt.12761.1.A1_at, Bt.5107.1.S1_at, Bt.117.1.S1_at, Bt.8306.1.S1_at, Bt.29698.1.A1_at, Bt.409.1.S1_at, Bt.4679.1.S1_at, Bt.9972.1.S1_at, Bt.13744.1.A1_at, Bt.7157.1.S1_at, Bt.5590.1.S1_at, Bt.800.1.S1_at, Bt.9026.1.S1_at, Bt.10855.1.S1_at, Bt.29696.1.A1_at, Bt.29696.1.S1_at,…	1	1	100
GOTERM_MF_ALL	GO:0004872~receptor activity	24	0.0275	1	Bt.4943.3.S1_a_at, Bt.9026.1.S1_at, Bt.714.1.S1_at, Bt.1518.1.S1_at, Bt.29696.1.A1_at, Bt.29696.1.S1_at, Bt.21540.1.S1_at, Bt.499.1.S1_a_at, Bt.13991.1.A1_at, Bt.13991.2.S1_a_at, Bt.4557.1.S1_at, Bt.12761.1.A1_at, Bt.5107.1.S1_at, Bt.13036.1.S1_at, Bt.13046.1.S1_at, Bt.13046.1.A1_at, Bt.8306.1.S1_at, Bt.29698.1.A1_at, Bt.2981.1.S1_at, Bt.4679.1.S1_at, Bt.9972.1.S1_at, Bt.13744.1.A1_at, Bt.13387.1…	1	1	100

## Sheet: B
Worksheet B. Functional annotation clustering of genes expressed at a greater level in stromal tissue
Functional Group 1	Median: 5.307063247569036E-13	Geo: 1.7227931764926714E-12	Bt.12912.1.S1_at, Bt.12912.1.S2_at, Bt.8124.1.S1_at, Bt.8124.1.S2_at, Bt.12302.1.S1_at, Bt.6768.1.S1_at, Bt.154.1.S1_at, Bt.28088.1.S1_at, Bt.3686.1.S1_at, Bt.11178.1.S1_at, Bt.23318.1.S1_at, Bt.23318.1.S2_at, Bt.28583.1.S1_s_at, Bt.11324.1.A1_s_at, Bt.10442.2.A1_at, Bt.2129.1.S1_at, Bt.5395.1.S1_a_at, Bt.2129.2.S1_at, Bt.23575.1.A1_at, Bt.5021.1.S1_at, Bt.24208.1.S1_at, Bt.24211.1.A1_at, Bt.7046…
Category	Term	Count	%	PValue	Genes	Bonferroni	Benjamini	FDR
GOTERM_CC_ALL	GO:0044421~extracellular region part	42	0.0993	9.72598e-18	Bt.12912.1.S1_at, Bt.12912.1.S2_at, Bt.8124.1.S1_at, Bt.8124.1.S2_at, Bt.12302.1.S1_at, Bt.6768.1.S1_at, Bt.154.1.S1_at, Bt.28088.1.S1_at, Bt.3686.1.S1_at, Bt.11178.1.S1_at, Bt.23318.1.S1_at, Bt.23318.1.S2_at, Bt.28583.1.S1_s_at, Bt.11324.1.A1_s_at, Bt.10442.2.A1_at, Bt.2129.1.S1_at, Bt.5395.1.S1_a_at, Bt.2129.2.S1_at, Bt.23575.1.A1_at, Bt.5021.1.S1_at, Bt.24208.1.S1_at, Bt.24211.1.A1_at, Bt.7046…	5.44655e-15	5.44655e-15	1.42289e-14
GOTERM_CC_ALL	GO:0005576~extracellular region	59	0.1395	1.87799e-16	Bt.24345.1.S1_at, Bt.9958.1.S1_at, Bt.5237.1.S1_at, Bt.8124.1.S1_at, Bt.8124.1.S2_at, Bt.6768.1.S1_at, Bt.28088.1.S1_at, Bt.11178.1.S1_at, Bt.3686.1.S1_at, Bt.11324.1.A1_s_at, Bt.10442.2.A1_at, Bt.2129.1.S1_at, Bt.5395.1.S1_a_at, Bt.2129.2.S1_at, Bt.23575.1.A1_at, Bt.24211.1.A1_at, Bt.7046.1.S1_at, Bt.5398.1.S1_at, Bt.2452.1.S1_at, Bt.5472.1.S1_at, Bt.2408.1.S1_s_at, Bt.2408.1.S1_at, Bt.23178.1.S…	1.24345e-13	6.21725e-14	3.21965e-13
GOTERM_CC_ALL	GO:0005578~proteinaceous extracellular matrix	28	0.0662	5.91921e-14	Bt.12912.1.S1_at, Bt.12912.1.S2_at, Bt.8124.1.S1_at, Bt.8124.1.S2_at, Bt.6768.1.S1_at, Bt.11178.1.S1_at, Bt.23318.1.S1_at, Bt.23318.1.S2_at, Bt.28583.1.S1_s_at, Bt.11324.1.A1_s_at, Bt.10442.2.A1_at, Bt.23575.1.A1_at, Bt.2129.1.S1_at, Bt.5395.1.S1_a_at, Bt.2129.2.S1_at, Bt.5021.1.S1_at, Bt.24211.1.A1_at, Bt.7046.1.S1_at, Bt.15675.1.S1_at, Bt.5341.1.S1_at, Bt.5398.1.S1_at, Bt.5313.1.S1_at, Bt.7183.…	3.31379e-11	1.10459e-11	8.65752e-11
GOTERM_CC_ALL	GO:0031012~extracellular matrix	28	0.0662	1.00222e-12	Bt.12912.1.S1_at, Bt.12912.1.S2_at, Bt.8124.1.S1_at, Bt.8124.1.S2_at, Bt.6768.1.S1_at, Bt.11178.1.S1_at, Bt.23318.1.S1_at, Bt.23318.1.S2_at, Bt.28583.1.S1_s_at, Bt.11324.1.A1_s_at, Bt.10442.2.A1_at, Bt.23575.1.A1_at, Bt.2129.1.S1_at, Bt.5395.1.S1_a_at, Bt.2129.2.S1_at, Bt.5021.1.S1_at, Bt.24211.1.A1_at, Bt.7046.1.S1_at, Bt.15675.1.S1_at, Bt.5341.1.S1_at, Bt.5398.1.S1_at, Bt.5313.1.S1_at, Bt.7183.…	5.61231e-10	1.40308e-10	1.46619e-09
GOTERM_CC_ALL	GO:0044420~extracellular matrix part	12	0.0284	1.35688e-07	Bt.2560.1.S1_at, Bt.14176.2.S1_at, Bt.14176.1.S1_at, Bt.435.1.S1_at, Bt.12912.1.S1_at, Bt.12912.1.S2_at, Bt.3126.1.A1_at, Bt.29910.1.S1_at, Bt.8124.1.S1_at, Bt.8124.1.S2_at, Bt.5398.1.S1_at, Bt.6768.1.S1_at, Bt.5136.1.S1_at, Bt.23318.1.S1_at, Bt.23318.1.S2_at, Bt.2452.1.S1_at, Bt.8549.1.S1_at, Bt.28583.1.S1_s_at, Bt.8549.1.S2_at, Bt.28583.1.S1_s_at,	7.59826e-05	1.5197e-05	0.000198509
SP_PIR_KEYWORDS	extracellular matrix	17	0.0402	1.77829e-06	Bt.20173.1.A1_at, Bt.23178.1.S1_at, Bt.23178.1.S2_at, Bt.5351.1.S1_a_at, Bt.2560.1.S1_at, Bt.14176.2.S1_at, Bt.14176.1.S1_at, Bt.435.1.S1_at, Bt.12912.1.S1_at, Bt.12912.1.S2_at, Bt.5361.2.S1_a_at, Bt.8124.1.S1_at, Bt.8124.1.S2_at, Bt.6768.1.S1_at, Bt.23318.1.S1_at, Bt.23318.1.S2_at, Bt.2129.1.S1_at, Bt.5395.1.S1_a_at, Bt.2129.2.S1_at, Bt.5021.1.S1_at, Bt.5341.1.S1_at, Bt.5136.1.S1_at, Bt.5313.1.S…	0.00130619	0.000261374	0.00269924
Functional Group 2	Median: 1.071803931180135E-8	Geo: 3.397235835816635E-10	Bt.24345.1.S1_at, Bt.350.1.S1_at, Bt.350.1.S1_x_at, Bt.4342.1.S1_at, Bt.9958.1.S1_at, Bt.5237.1.S1_at, Bt.8124.1.S1_at, Bt.8124.1.S2_at, Bt.137.1.S1_at, Bt.6768.1.S1_at, Bt.3686.1.S1_at, Bt.29890.1.S1_at, Bt.350.1.S1_x_at, Bt.350.1.S1_at, Bt.2129.1.S1_at, Bt.5395.1.S1_a_at, Bt.2129.2.S1_at, Bt.7046.1.S1_at, Bt.4285.1.S1_at, Bt.1855.1.S1_at, Bt.2452.1.S1_at, Bt.4653.1.S2_at, Bt.5226.1.S1_at, Bt.13…
Category	Term	Count	%	PValue	Genes	Bonferroni	Benjamini	FDR
SP_PIR_KEYWORDS	signal	93	0.2199	7.72787e-19	Bt.24345.1.S1_at, Bt.350.1.S1_at, Bt.350.1.S1_x_at, Bt.4342.1.S1_at, Bt.9958.1.S1_at, Bt.5237.1.S1_at, Bt.8124.1.S1_at, Bt.8124.1.S2_at, Bt.137.1.S1_at, Bt.6768.1.S1_at, Bt.3686.1.S1_at, Bt.29890.1.S1_at, Bt.350.1.S1_x_at, Bt.350.1.S1_at, Bt.2129.1.S1_at, Bt.5395.1.S1_a_at, Bt.2129.2.S1_at, Bt.7046.1.S1_at, Bt.4285.1.S1_at, Bt.1855.1.S1_at, Bt.2452.1.S1_at, Bt.4653.1.S2_at, Bt.5226.1.S1_at, Bt.13…	5.67998e-16	5.67998e-16	1.17302e-15
SP_PIR_KEYWORDS	glycoprotein	85	0.2009	1.92717e-13	Bt.24345.1.S1_at, Bt.4342.1.S1_at, Bt.9958.1.S1_at, Bt.5237.1.S1_at, Bt.8124.1.S1_at, Bt.8124.1.S2_at, Bt.137.1.S1_at, Bt.6768.1.S1_at, Bt.3686.1.S1_at, Bt.350.1.S1_x_at, Bt.350.1.S1_at, Bt.2129.1.S1_at, Bt.5395.1.S1_a_at, Bt.2129.2.S1_at, Bt.15707.1.S1_at, Bt.27462.1.S1_a_at, Bt.4285.1.S1_at, Bt.2452.1.S1_at, Bt.4653.1.S2_at, Bt.5226.1.S1_at, Bt.10098.1.S1_at, Bt.13181.1.S1_a_at, Bt.2408.1.S1_s_…	1.4166e-10	7.083e-11	2.92555e-10
UP_SEQ_FEATURE	signal peptide	76	0.1797	3.88265e-09	Bt.350.1.S1_at, Bt.350.1.S1_x_at, Bt.4342.1.S1_at, Bt.9958.1.S1_at, Bt.5237.1.S1_at, Bt.137.1.S1_at, Bt.8124.1.S1_at, Bt.8124.1.S2_at, Bt.6768.1.S1_at, Bt.3686.1.S1_at, Bt.29890.1.S1_at, Bt.2129.1.S1_at, Bt.5395.1.S1_a_at, Bt.2129.2.S1_at, Bt.4285.1.S1_at, Bt.1855.1.S1_at, Bt.2452.1.S1_at, Bt.4653.1.S2_at, Bt.5226.1.S1_at, Bt.13181.1.S1_a_at, Bt.2408.1.S1_s_at, Bt.2408.1.S1_at, Bt.23178.1.S1_at, …	1.35543e-05	1.35543e-05	7.10939e-06
SP_PIR_KEYWORDS	Secreted	57	0.1348	1.75534e-08	Bt.24345.1.S1_at, Bt.9958.1.S1_at, Bt.5237.1.S1_at, Bt.137.1.S1_at, Bt.8124.1.S1_at, Bt.8124.1.S2_at, Bt.6768.1.S1_at, Bt.3686.1.S1_at, Bt.2129.1.S1_at, Bt.5395.1.S1_a_at, Bt.2129.2.S1_at, Bt.1855.1.S1_at, Bt.2452.1.S1_at, Bt.5226.1.S1_at, Bt.23178.1.S1_at, Bt.23178.1.S2_at, Bt.12930.1.S1_a_at, Bt.2560.1.S1_at, Bt.14176.2.S1_at, Bt.14176.1.S1_at, Bt.435.1.S1_at, Bt.5361.2.S1_a_at, Bt.611.1.S2_at,…	1.29017e-05	4.30058e-06	2.66445e-05
UP_SEQ_FEATURE	disulfide bond	66	0.156	2.09632e-06	Bt.4342.1.S1_at, Bt.9958.1.S1_at, Bt.5237.1.S1_at, Bt.137.1.S1_at, Bt.6768.1.S1_at, Bt.3686.1.S1_at, Bt.15972.1.S1_at, Bt.22869.1.S1_at, Bt.2129.1.S1_at, Bt.5395.1.S1_a_at, Bt.2129.2.S1_at, Bt.15707.1.S1_at, Bt.27462.1.S1_a_at, Bt.5092.3.S1_at, Bt.5092.1.S1_at, Bt.4285.1.S1_at, Bt.1855.1.S1_at, Bt.4653.1.S2_at, Bt.2452.1.S1_at, Bt.5226.1.S1_at, Bt.13181.1.S1_a_at, Bt.2408.1.S1_s_at, Bt.2408.1.S1_…	0.00729153	0.00365244	0.00383842
UP_SEQ_FEATURE	glycosylation site:N-linked (GlcNAc...)	59	0.1395	7.22482e-05	Bt.4342.1.S1_at, Bt.5237.1.S1_at, Bt.137.1.S1_at, Bt.6768.1.S1_at, Bt.3686.1.S1_at, Bt.2129.1.S1_at, Bt.5395.1.S1_a_at, Bt.2129.2.S1_at, Bt.15707.1.S1_at, Bt.27462.1.S1_a_at, Bt.4285.1.S1_at, Bt.4653.1.S2_at, Bt.5226.1.S1_at, Bt.13181.1.S1_a_at, Bt.23178.1.S1_at, Bt.23178.1.S2_at, Bt.4390.1.S1_at, Bt.2560.1.S1_at, Bt.3885.1.S1_at, Bt.3885.3.S1_at, Bt.9973.1.S2_at, Bt.4482.2.S1_a_at, Bt.2537.2.S1_…	0.222932	0.0806385	0.132208
Functional Group 3	Median: 2.9794547908850134E-11	Geo: 2.0244064001405174E-9	Bt.4342.1.S1_at, Bt.2314.1.S1_at, Bt.4177.3.A1_at, Bt.18280.1.S1_at, Bt.11324.1.A1_s_at, Bt.10442.2.A1_at, Bt.2129.1.S1_at, Bt.5395.1.S1_a_at, Bt.2129.2.S1_at, Bt.5372.1.S1_at, Bt.7043.2.S1_a_at, Bt.4571.1.S1_at, Bt.24208.1.S1_at, Bt.26265.1.A1_at, Bt.20373.1.S1_at, Bt.2696.2.S1_at, Bt.2696.1.A1_at, Bt.13039.1.A1_at, Bt.13039.1.S1_at, Bt.5398.1.S1_at, Bt.15707.1.S1_at, Bt.27462.1.S1_a_at, Bt.1599…
Category	Term	Count	%	PValue	Genes	Bonferroni	Benjamini	FDR
GOTERM_BP_ALL	GO:0022610~biological adhesion	32	0.0757	2.97945e-11	Bt.4342.1.S1_at, Bt.2314.1.S1_at, Bt.4177.3.A1_at, Bt.18280.1.S1_at, Bt.11324.1.A1_s_at, Bt.10442.2.A1_at, Bt.2129.1.S1_at, Bt.5395.1.S1_a_at, Bt.2129.2.S1_at, Bt.5372.1.S1_at, Bt.7043.2.S1_a_at, Bt.4571.1.S1_at, Bt.24208.1.S1_at, Bt.26265.1.A1_at, Bt.20373.1.S1_at, Bt.2696.2.S1_at, Bt.2696.1.A1_at, Bt.13039.1.A1_at, Bt.13039.1.S1_at, Bt.5398.1.S1_at, Bt.15707.1.S1_at, Bt.27462.1.S1_a_at, Bt.1599…	9.92157e-08	4.96078e-08	5.42736e-08
GOTERM_BP_ALL	GO:0007155~cell adhesion	32	0.0757	2.97945e-11	Bt.4342.1.S1_at, Bt.2314.1.S1_at, Bt.4177.3.A1_at, Bt.18280.1.S1_at, Bt.11324.1.A1_s_at, Bt.10442.2.A1_at, Bt.2129.1.S1_at, Bt.5395.1.S1_a_at, Bt.2129.2.S1_at, Bt.5372.1.S1_at, Bt.7043.2.S1_a_at, Bt.4571.1.S1_at, Bt.24208.1.S1_at, Bt.26265.1.A1_at, Bt.20373.1.S1_at, Bt.2696.2.S1_at, Bt.2696.1.A1_at, Bt.13039.1.A1_at, Bt.13039.1.S1_at, Bt.5398.1.S1_at, Bt.15707.1.S1_at, Bt.27462.1.S1_a_at, Bt.1599…	9.92157e-08	4.96078e-08	5.42736e-08
SP_PIR_KEYWORDS	cell adhesion	17	0.0402	9.34587e-06	Bt.20173.1.A1_at, Bt.4342.1.S1_at, Bt.2314.1.S1_at, Bt.9973.1.S2_at, Bt.4177.3.A1_at, Bt.15715.1.S1_at, Bt.5536.1.S1_at, Bt.5372.1.S1_at, Bt.354.1.S1_at, Bt.6592.1.S1_at, Bt.24208.1.S1_at, Bt.5522.1.S1_at, Bt.6449.1.S1_at, Bt.13039.1.A1_at, Bt.13039.1.S1_at, Bt.15707.1.S1_at, Bt.27462.1.S1_a_at, Bt.4653.1.S2_at, Bt.29721.1.S1_at, Bt.29721.1.A1_at, Bt.23418.1.S1_at,	0.0068457	0.00114422	0.0141852
Functional Group 4	Median: 1.3571867457291158E-5	Geo: 4.656668849970684E-7	Bt.24345.1.S1_at, Bt.4903.1.S1_at, Bt.4903.1.S2_at, Bt.11476.1.S1_at, Bt.137.1.S1_at, Bt.18280.1.S1_at, Bt.3686.1.S1_at, Bt.15972.1.S1_at, Bt.1948.1.S1_at, Bt.2129.1.S1_at, Bt.5395.1.S1_a_at, Bt.2129.2.S1_at, Bt.17161.1.S1_at, Bt.1303.1.S1_at, Bt.4565.1.S1_at, Bt.5472.1.S1_at, Bt.5226.1.S1_at, Bt.13556.1.S1_a_at, Bt.13556.2.A1_at, Bt.13556.2.A1_x_at, Bt.5267.1.S1_at, Bt.4390.1.S1_at, Bt.12930.1.S…
Category	Term	Count	%	PValue	Genes	Bonferroni	Benjamini	FDR
GOTERM_BP_ALL	GO:0032501~multicellular organismal process	62	0.1466	9.83542e-15	Bt.24345.1.S1_at, Bt.4903.1.S1_at, Bt.4903.1.S2_at, Bt.11476.1.S1_at, Bt.137.1.S1_at, Bt.18280.1.S1_at, Bt.3686.1.S1_at, Bt.15972.1.S1_at, Bt.1948.1.S1_at, Bt.2129.1.S1_at, Bt.5395.1.S1_a_at, Bt.2129.2.S1_at, Bt.17161.1.S1_at, Bt.1303.1.S1_at, Bt.4565.1.S1_at, Bt.5472.1.S1_at, Bt.5226.1.S1_at, Bt.13556.1.S1_a_at, Bt.13556.2.A1_at, Bt.13556.2.A1_x_at, Bt.5267.1.S1_at, Bt.4390.1.S1_at, Bt.12930.1.S…	3.29037e-11	3.29037e-11	1.79967e-11
GOTERM_BP_ALL	GO:0007275~multicellular organismal development	44	0.104	4.22283e-11	Bt.440.1.S1_at, Bt.2415.1.S1_at, Bt.4903.1.S1_at, Bt.4903.1.S2_at, Bt.11476.1.S1_at, Bt.137.1.S1_at, Bt.3686.1.S1_at, Bt.15556.1.A1_s_at, Bt.18280.1.S1_at, Bt.15972.1.S1_at, Bt.1948.1.S1_at, Bt.2129.1.S1_at, Bt.5395.1.S1_a_at, Bt.2129.2.S1_at, Bt.12112.1.S1_at, Bt.2230.1.S1_at, Bt.3478.1.A1_s_at, Bt.2230.1.S2_at, Bt.4719.1.S1_at, Bt.17161.1.S1_at, Bt.1303.1.S1_at, Bt.4057.1.S1_at, Bt.24208.1.S1_a…	1.4062e-07	3.51551e-08	7.69231e-08
GOTERM_BP_ALL	GO:0032502~developmental process	55	0.13	1.12542e-10	Bt.9958.1.S1_at, Bt.16018.1.S2_at, Bt.4903.1.S1_at, Bt.4903.1.S2_at, Bt.5237.1.S1_at, Bt.137.1.S1_at, Bt.11476.1.S1_at, Bt.18280.1.S1_at, Bt.3686.1.S1_at, Bt.15972.1.S1_at, Bt.1948.1.S1_at, Bt.2129.1.S1_at, Bt.5395.1.S1_a_at, Bt.2129.2.S1_at, Bt.17161.1.S1_at, Bt.1303.1.S1_at, Bt.4565.1.S1_at, Bt.615.1.S1_at, Bt.5598.1.S1_at, Bt.5472.1.S1_at, Bt.5226.1.S1_at, Bt.4390.1.S1_at, Bt.14176.2.S1_at, Bt…	3.74766e-07	7.49532e-08	2.05007e-07
GOTERM_BP_ALL	GO:0048856~anatomical structure development	37	0.0875	1.0379e-09	Bt.440.1.S1_at, Bt.9958.1.S1_at, Bt.2415.1.S1_at, Bt.4903.1.S1_at, Bt.4903.1.S2_at, Bt.5237.1.S1_at, Bt.137.1.S1_at, Bt.3686.1.S1_at, Bt.15556.1.A1_s_at, Bt.13482.1.S1_at, Bt.15972.1.S1_at, Bt.1948.1.S1_at, Bt.2129.1.S1_at, Bt.5395.1.S1_a_at, Bt.2129.2.S1_at, Bt.12112.1.S1_at, Bt.2230.1.S1_at, Bt.3478.1.A1_s_at, Bt.2230.1.S2_at, Bt.4719.1.S1_at, Bt.4057.1.S1_at, Bt.24208.1.S1_at, Bt.5229.1.S1_at,…	3.45621e-06	5.76036e-07	1.89064e-06
GOTERM_BP_ALL	GO:0048513~organ development	28	0.0662	7.83042e-09	Bt.2415.1.S1_at, Bt.4903.1.S1_at, Bt.4903.1.S2_at, Bt.137.1.S1_at, Bt.15556.1.A1_s_at, Bt.3686.1.S1_at, Bt.15972.1.S1_at, Bt.1948.1.S1_at, Bt.2129.1.S1_at, Bt.5395.1.S1_a_at, Bt.2129.2.S1_at, Bt.4719.1.S1_at, Bt.24208.1.S1_at, Bt.26265.1.A1_at, Bt.5229.1.S1_at, Bt.2638.1.S1_at, Bt.2047.1.S1_at, Bt.4998.1.S1_at, Bt.5472.1.S1_at, Bt.2220.2.A1_a_at, Bt.4390.1.S1_at, Bt.543.1.S1_at, Bt.2344.1.S1_at, …	2.6075e-05	3.25941e-06	1.42639e-05
GOTERM_BP_ALL	GO:0048731~system development	31	0.0733	1.07115e-08	Bt.2415.1.S1_at, Bt.4903.1.S1_at, Bt.4903.1.S2_at, Bt.137.1.S1_at, Bt.3686.1.S1_at, Bt.15556.1.A1_s_at, Bt.15972.1.S1_at, Bt.1948.1.S1_at, Bt.2129.1.S1_at, Bt.5395.1.S1_a_at, Bt.2129.2.S1_at, Bt.12112.1.S1_at, Bt.4719.1.S1_at, Bt.4057.1.S1_at, Bt.24208.1.S1_at, Bt.26265.1.A1_at, Bt.5229.1.S1_at, Bt.2638.1.S1_at, Bt.2047.1.S1_at, Bt.4998.1.S1_at, Bt.5472.1.S1_at, Bt.2220.2.A1_a_at, Bt.4390.1.S1_at…	3.56687e-05	3.96325e-06	1.95121e-05
GOTERM_BP_ALL	GO:0009653~anatomical structure morphogenesis	21	0.0496	1.35719e-05	Bt.440.1.S1_at, Bt.9958.1.S1_at, Bt.4390.1.S1_at, Bt.4903.1.S1_at, Bt.4903.1.S2_at, Bt.5237.1.S1_at, Bt.137.1.S1_at, Bt.2344.1.S1_at, Bt.15556.1.A1_s_at, Bt.5230.1.S1_at, Bt.13482.1.S1_at, Bt.15972.1.S1_at, Bt.2230.1.S1_at, Bt.3478.1.A1_s_at, Bt.2230.1.S2_at, Bt.4719.1.S1_at, Bt.12750.1.S1_at, Bt.4057.1.S1_at, Bt.5229.1.S1_at, Bt.26265.1.A1_at, Bt.2638.1.S1_at, Bt.422.1.S2_at, Bt.422.1.S1_at, Bt.…	0.0441886	0.00410017	0.0247196
GOTERM_BP_ALL	GO:0065007~biological regulation	76	0.1797	6.15355e-05	Bt.24345.1.S1_at, Bt.11135.1.S1_at, Bt.9958.1.S1_at, Bt.16018.1.S2_at, Bt.4903.1.S1_at, Bt.4903.1.S2_at, Bt.5237.1.S1_at, Bt.6446.1.S1_at, Bt.137.1.S1_at, Bt.8122.1.S1_a_at, Bt.3686.1.S1_at, Bt.15972.1.S1_at, Bt.17161.1.S1_at, Bt.1303.1.S1_at, Bt.4565.1.S1_at, Bt.4250.2.S1_at, Bt.28182.1.A1_at, Bt.5092.3.S1_at, Bt.5092.1.S1_at, Bt.21835.1.S1_at, Bt.4653.1.S2_at, Bt.5472.1.S1_at, Bt.13556.1.S1_a_a…	0.185287	0.0135684	0.112034
GOTERM_BP_ALL	GO:0048468~cell development	23	0.0544	0.000150392	Bt.3890.1.S1_at, Bt.5027.1.A1_at, Bt.16018.1.S2_at, Bt.4903.1.S1_at, Bt.4903.1.S2_at, Bt.14176.2.S1_at, Bt.14176.1.S1_at, Bt.435.1.S1_at, Bt.543.1.S1_at, Bt.2344.1.S1_at, Bt.9973.1.S2_at, Bt.3686.1.S1_at, Bt.15972.1.S1_at, Bt.1948.1.S1_at, Bt.8140.1.S1_at, Bt.12112.1.S1_at, Bt.4719.1.S1_at, Bt.12750.1.S1_at, Bt.4057.1.S1_at, Bt.2638.1.S1_at, Bt.422.1.S2_at, Bt.422.1.S1_at, Bt.12825.1.S1_at, Bt.61…	0.39398	0.0290315	0.273599
GOTERM_BP_ALL	GO:0030154~cell differentiation	27	0.0638	0.000899971	Bt.16018.1.S2_at, Bt.2415.1.S1_at, Bt.4903.1.S1_at, Bt.4903.1.S2_at, Bt.137.1.S1_at, Bt.3686.1.S1_at, Bt.15972.1.S1_at, Bt.1948.1.S1_at, Bt.12112.1.S1_at, Bt.4719.1.S1_at, Bt.4057.1.S1_at, Bt.2638.1.S1_at, Bt.615.1.S1_at, Bt.5598.1.S1_at, Bt.5226.1.S1_at, Bt.5472.1.S1_at, Bt.3890.1.S1_at, Bt.5027.1.A1_at, Bt.14176.2.S1_at, Bt.14176.1.S1_at, Bt.435.1.S1_at, Bt.543.1.S1_at, Bt.2344.1.S1_at, Bt.9973…	0.950126	0.105103	1.62675
GOTERM_BP_ALL	GO:0048869~cellular developmental process	27	0.0638	0.000899971	Bt.16018.1.S2_at, Bt.2415.1.S1_at, Bt.4903.1.S1_at, Bt.4903.1.S2_at, Bt.137.1.S1_at, Bt.3686.1.S1_at, Bt.15972.1.S1_at, Bt.1948.1.S1_at, Bt.12112.1.S1_at, Bt.4719.1.S1_at, Bt.4057.1.S1_at, Bt.2638.1.S1_at, Bt.615.1.S1_at, Bt.5598.1.S1_at, Bt.5226.1.S1_at, Bt.5472.1.S1_at, Bt.3890.1.S1_at, Bt.5027.1.A1_at, Bt.14176.2.S1_at, Bt.14176.1.S1_at, Bt.435.1.S1_at, Bt.543.1.S1_at, Bt.2344.1.S1_at, Bt.9973…	0.950126	0.105103	1.62675
GOTERM_BP_ALL	GO:0050789~regulation of biological process	63	0.1489	0.00297096	Bt.24345.1.S1_at, Bt.9958.1.S1_at, Bt.16018.1.S2_at, Bt.4903.1.S1_at, Bt.4903.1.S2_at, Bt.5237.1.S1_at, Bt.6446.1.S1_at, Bt.137.1.S1_at, Bt.8122.1.S1_a_at, Bt.3686.1.S1_at, Bt.15972.1.S1_at, Bt.17161.1.S1_at, Bt.1303.1.S1_at, Bt.4565.1.S1_at, Bt.4250.2.S1_at, Bt.28182.1.A1_at, Bt.5092.3.S1_at, Bt.5092.1.S1_at, Bt.4653.1.S2_at, Bt.5472.1.S1_at, Bt.13556.1.S1_a_at, Bt.13556.2.A1_at, Bt.13556.2.A1_x…	0.99995	0.210145	5.27569
GOTERM_BP_ALL	GO:0050794~regulation of cellular process	53	0.1253	0.0393669	Bt.9958.1.S1_at, Bt.16018.1.S2_at, Bt.4903.1.S1_at, Bt.4903.1.S2_at, Bt.6446.1.S1_at, Bt.5237.1.S1_at, Bt.8122.1.S1_a_at, Bt.3686.1.S1_at, Bt.15972.1.S1_at, Bt.17161.1.S1_at, Bt.1303.1.S1_at, Bt.4565.1.S1_at, Bt.28182.1.A1_at, Bt.4250.2.S1_at, Bt.5092.3.S1_at, Bt.5092.1.S1_at, Bt.4653.1.S2_at, Bt.5472.1.S1_at, Bt.26612.2.S1_at, Bt.4390.1.S1_at, Bt.14176.2.S1_at, Bt.14176.1.S1_at, Bt.435.1.S1_at, …	1	0.755321	51.8863
Functional Group 5	Median: 2.697455110833923E-5	Geo: 7.695197338855978E-6	Bt.3890.1.S1_at, Bt.13556.1.S1_a_at, Bt.13556.2.A1_at, Bt.13556.2.A1_x_at, Bt.24345.1.S1_at, Bt.4342.1.S1_at, Bt.22969.1.S1_a_at, Bt.154.1.S1_at, Bt.611.1.S2_at, Bt.4177.3.A1_at, Bt.3686.1.S1_at, Bt.15972.1.S1_at, Bt.1345.1.S1_at, Bt.8140.1.S1_at, Bt.471.1.S1_at, Bt.5366.1.S1_at, Bt.22002.1.S1_at, Bt.97.1.S1_at, Bt.4057.1.S1_at, Bt.2017.1.S1_at, Bt.6449.1.S1_at, Bt.4507.1.S1_at, Bt.4285.1.S1_at, …
Category	Term	Count	%	PValue	Genes	Bonferroni	Benjamini	FDR
GOTERM_BP_ALL	GO:0009611~response to wounding	22	0.052	3.24704e-09	Bt.3890.1.S1_at, Bt.13556.1.S1_a_at, Bt.13556.2.A1_at, Bt.13556.2.A1_x_at, Bt.24345.1.S1_at, Bt.4342.1.S1_at, Bt.22969.1.S1_a_at, Bt.154.1.S1_at, Bt.611.1.S2_at, Bt.4177.3.A1_at, Bt.3686.1.S1_at, Bt.15972.1.S1_at, Bt.1345.1.S1_at, Bt.8140.1.S1_at, Bt.471.1.S1_at, Bt.5366.1.S1_at, Bt.22002.1.S1_at, Bt.97.1.S1_at, Bt.4057.1.S1_at, Bt.2017.1.S1_at, Bt.6449.1.S1_at, Bt.4507.1.S1_at, Bt.4285.1.S1_at, …	1.08126e-05	1.54466e-06	5.91479e-06
GOTERM_BP_ALL	GO:0009605~response to external stimulus	23	0.0544	5.29905e-08	Bt.3890.1.S1_at, Bt.13556.1.S1_a_at, Bt.13556.2.A1_at, Bt.13556.2.A1_x_at, Bt.24345.1.S1_at, Bt.2408.1.S1_s_at, Bt.2408.1.S1_at, Bt.4342.1.S1_at, Bt.22969.1.S1_a_at, Bt.154.1.S1_at, Bt.611.1.S2_at, Bt.4177.3.A1_at, Bt.3686.1.S1_at, Bt.15972.1.S1_at, Bt.1345.1.S1_at, Bt.8140.1.S1_at, Bt.471.1.S1_at, Bt.5366.1.S1_at, Bt.22002.1.S1_at, Bt.97.1.S1_at, Bt.4057.1.S1_at, Bt.2017.1.S1_at, Bt.6449.1.S1_at…	0.000176443	1.76457e-05	9.65273e-05
GOTERM_BP_ALL	GO:0050896~response to stimulus	48	0.1135	2.13404e-05	Bt.24345.1.S1_at, Bt.350.1.S1_at, Bt.350.1.S1_x_at, Bt.4342.1.S1_at, Bt.4303.1.S1_at, Bt.6446.1.S1_at, Bt.7478.1.S1_at, Bt.24256.2.S1_a_at, Bt.154.1.S1_at, Bt.28088.1.S1_at, Bt.9217.1.A1_at, Bt.4177.3.A1_at, Bt.3686.1.S1_at, Bt.350.1.S1_x_at, Bt.350.1.S1_at, Bt.15972.1.S1_at, Bt.12112.1.S1_at, Bt.4719.1.S1_at, Bt.4057.1.S1_at, Bt.2017.1.S1_at, Bt.9296.1.A1_at, Bt.4565.1.S1_at, Bt.22978.2.S1_at, B…	0.0685979	0.00590451	0.0388664
GOTERM_BP_ALL	GO:0006954~inflammatory response	13	0.0307	3.26087e-05	Bt.3890.1.S1_at, Bt.24345.1.S1_at, Bt.13556.1.S1_a_at, Bt.13556.2.A1_at, Bt.13556.2.A1_x_at, Bt.4342.1.S1_at, Bt.611.1.S2_at, Bt.4177.3.A1_at, Bt.154.1.S1_at, Bt.3686.1.S1_at, Bt.8140.1.S1_at, Bt.22002.1.S1_at, Bt.97.1.S1_at, Bt.4507.1.S1_at, Bt.4285.1.S1_at, Bt.29721.1.S1_at, Bt.29721.1.A1_at, Bt.23418.1.S1_at,	0.102901	0.0083182	0.0593834
GOTERM_BP_ALL	GO:0006950~response to stress	25	0.0591	0.000183288	Bt.24345.1.S1_at, Bt.4342.1.S1_at, Bt.6446.1.S1_at, Bt.7478.1.S1_at, Bt.4177.3.A1_at, Bt.154.1.S1_at, Bt.3686.1.S1_at, Bt.15972.1.S1_at, Bt.4719.1.S1_at, Bt.4057.1.S1_at, Bt.2017.1.S1_at, Bt.4285.1.S1_at, Bt.4653.1.S2_at, Bt.29721.1.S1_at, Bt.29721.1.A1_at, Bt.23418.1.S1_at, Bt.3890.1.S1_at, Bt.13556.1.S1_a_at, Bt.13556.2.A1_at, Bt.13556.2.A1_x_at, Bt.611.1.S2_at, Bt.22969.1.S1_a_at, Bt.471.1.S1_…	0.456869	0.0300592	0.333351
GOTERM_BP_ALL	GO:0006952~defense response	14	0.0331	0.00946158	Bt.3890.1.S1_at, Bt.24345.1.S1_at, Bt.13556.1.S1_a_at, Bt.13556.2.A1_at, Bt.13556.2.A1_x_at, Bt.4342.1.S1_at, Bt.611.1.S2_at, Bt.4177.3.A1_at, Bt.154.1.S1_at, Bt.3686.1.S1_at, Bt.8140.1.S1_at, Bt.22002.1.S1_at, Bt.97.1.S1_at, Bt.4507.1.S1_at, Bt.209.3.S1_at, Bt.4285.1.S1_at, Bt.29721.1.S1_at, Bt.29721.1.A1_at, Bt.23418.1.S1_at,	1	0.415244	15.9008
Functional Group 6	Median: 2.343508317914194E-4	Geo: 8.72090026632493E-5	Bt.4342.1.S1_at, Bt.2314.1.S1_at, Bt.4390.1.S1_at, Bt.12302.1.S1_at, Bt.9973.1.S2_at, Bt.8803.1.A1_at, Bt.5223.1.S1_at, Bt.471.1.S1_at, Bt.2129.1.S1_at, Bt.5395.1.S1_a_at, Bt.2129.2.S1_at, Bt.5366.1.S1_at, Bt.5536.1.S1_at, Bt.5522.1.S1_at, Bt.5021.1.S1_at, Bt.6449.1.S1_at, Bt.411.1.S1_at, Bt.5398.1.S1_at, Bt.4740.1.S1_at, Bt.29721.1.S1_at, Bt.29721.1.A1_at, Bt.23418.1.S1_at, Bt.29890.1.S1_at,
Category	Term	Count	%	PValue	Genes	Bonferroni	Benjamini	FDR
INTERPRO	IPR013032:EGF-like region	18	0.0426	1.60832e-07	Bt.4342.1.S1_at, Bt.2314.1.S1_at, Bt.4390.1.S1_at, Bt.12302.1.S1_at, Bt.9973.1.S2_at, Bt.8803.1.A1_at, Bt.5223.1.S1_at, Bt.471.1.S1_at, Bt.2129.1.S1_at, Bt.5395.1.S1_a_at, Bt.2129.2.S1_at, Bt.5366.1.S1_at, Bt.5536.1.S1_at, Bt.5522.1.S1_at, Bt.5021.1.S1_at, Bt.6449.1.S1_at, Bt.411.1.S1_at, Bt.5398.1.S1_at, Bt.4740.1.S1_at, Bt.29721.1.S1_at, Bt.29721.1.A1_at, Bt.23418.1.S1_at,	0.000542016	0.000542016	0.000293365
SP_PIR_KEYWORDS	egf-like domain	15	0.0355	6.20769e-07	Bt.4342.1.S1_at, Bt.2314.1.S1_at, Bt.4390.1.S1_at, Bt.12302.1.S1_at, Bt.8803.1.A1_at, Bt.5223.1.S1_at, Bt.471.1.S1_at, Bt.5366.1.S1_at, Bt.2129.1.S1_at, Bt.5395.1.S1_a_at, Bt.2129.2.S1_at, Bt.5522.1.S1_at, Bt.5021.1.S1_at, Bt.6449.1.S1_at, Bt.411.1.S1_at, Bt.5398.1.S1_at, Bt.4740.1.S1_at,	0.000456162	0.00011406	0.000942267
INTERPRO	IPR000742:EGF-like, type 3	14	0.0331	2.61037e-06	Bt.4342.1.S1_at, Bt.2314.1.S1_at, Bt.4390.1.S1_at, Bt.12302.1.S1_at, Bt.29890.1.S1_at, Bt.5223.1.S1_at, Bt.471.1.S1_at, Bt.5366.1.S1_at, Bt.2129.1.S1_at, Bt.5395.1.S1_a_at, Bt.2129.2.S1_at, Bt.5522.1.S1_at, Bt.5021.1.S1_at, Bt.6449.1.S1_at, Bt.411.1.S1_at, Bt.5398.1.S1_at,	0.00876098	0.00439013	0.00476135
INTERPRO	IPR006210:EGF	14	0.0331	4.31005e-06	Bt.4342.1.S1_at, Bt.2314.1.S1_at, Bt.4390.1.S1_at, Bt.12302.1.S1_at, Bt.5223.1.S1_at, Bt.471.1.S1_at, Bt.5536.1.S1_at, Bt.5366.1.S1_at, Bt.2129.1.S1_at, Bt.5395.1.S1_a_at, Bt.2129.2.S1_at, Bt.5522.1.S1_at, Bt.5021.1.S1_at, Bt.411.1.S1_at, Bt.5398.1.S1_at, Bt.4740.1.S1_at,	0.0144242	0.00483136	0.00786146
SMART	SM00181:EGF	14	0.0331	9.01613e-06	Bt.4342.1.S1_at, Bt.2314.1.S1_at, Bt.4390.1.S1_at, Bt.12302.1.S1_at, Bt.5223.1.S1_at, Bt.471.1.S1_at, Bt.5536.1.S1_at, Bt.5366.1.S1_at, Bt.2129.1.S1_at, Bt.5395.1.S1_a_at, Bt.2129.2.S1_at, Bt.5522.1.S1_at, Bt.5021.1.S1_at, Bt.411.1.S1_at, Bt.5398.1.S1_at, Bt.4740.1.S1_at,	0.00446204	0.00446204	0.0129682
INTERPRO	IPR006209:EGF-like	10	0.0236	0.000234351	Bt.2129.1.S1_at, Bt.5395.1.S1_a_at, Bt.2129.2.S1_at, Bt.5366.1.S1_at, Bt.4342.1.S1_at, Bt.5021.1.S1_at, Bt.5522.1.S1_at, Bt.2314.1.S1_at, Bt.411.1.S1_at, Bt.12302.1.S1_at, Bt.471.1.S1_at, Bt.5223.1.S1_at,	0.546196	0.179238	0.426606
SMART	SM00179:EGF_CA	8	0.0189	0.000410149	Bt.2129.1.S1_at, Bt.5395.1.S1_a_at, Bt.2129.2.S1_at, Bt.5366.1.S1_at, Bt.5021.1.S1_at, Bt.5522.1.S1_at, Bt.6449.1.S1_at, Bt.8803.1.A1_at, Bt.471.1.S1_at, Bt.5223.1.S1_at,	0.18411	0.0967337	0.588348
INTERPRO	IPR001881:EGF-like calcium-binding	7	0.0165	0.000805058	Bt.2129.1.S1_at, Bt.5395.1.S1_a_at, Bt.2129.2.S1_at, Bt.5366.1.S1_at, Bt.5021.1.S1_at, Bt.6449.1.S1_at, Bt.8803.1.A1_at, Bt.471.1.S1_at, Bt.5223.1.S1_at,	0.933791	0.321485	1.45832
INTERPRO	IPR000152:Aspartic acid and asparagine hydroxylation site	7	0.0165	0.00107153	Bt.2129.1.S1_at, Bt.5395.1.S1_a_at, Bt.2129.2.S1_at, Bt.5366.1.S1_at, Bt.5021.1.S1_at, Bt.6449.1.S1_at, Bt.8803.1.A1_at, Bt.471.1.S1_at, Bt.5223.1.S1_at,	0.973057	0.363491	1.93657
UP_SEQ_FEATURE	domain:EGF-like 1	6	0.0142	0.0195674	Bt.2129.1.S1_at, Bt.5395.1.S1_a_at, Bt.2129.2.S1_at, Bt.5366.1.S1_at, Bt.5021.1.S1_at, Bt.4390.1.S1_at, Bt.5522.1.S1_at, Bt.471.1.S1_at,	1	0.999999	30.3609
UP_SEQ_FEATURE	domain:EGF-like 2; calcium-binding	3	0.0071	0.13505	Bt.2129.1.S1_at, Bt.5395.1.S1_a_at, Bt.2129.2.S1_at, Bt.5366.1.S1_at, Bt.5522.1.S1_at,	1	1	92.9812
Functional Group 7	Median: 0.0016098906026784634	Geo: 3.4594091360312716E-4	Bt.2415.1.S1_at, Bt.4903.1.S1_at, Bt.4903.1.S2_at, Bt.137.1.S1_at, Bt.15556.1.A1_s_at, Bt.3686.1.S1_at, Bt.15972.1.S1_at, Bt.1948.1.S1_at, Bt.2129.1.S1_at, Bt.5395.1.S1_a_at, Bt.2129.2.S1_at, Bt.4719.1.S1_at, Bt.24208.1.S1_at, Bt.26265.1.A1_at, Bt.5229.1.S1_at, Bt.2638.1.S1_at, Bt.2047.1.S1_at, Bt.4998.1.S1_at, Bt.5472.1.S1_at, Bt.2220.2.A1_a_at, Bt.4390.1.S1_at, Bt.543.1.S1_at, Bt.2344.1.S1_at, …
Category	Term	Count	%	PValue	Genes	Bonferroni	Benjamini	FDR
GOTERM_BP_ALL	GO:0048513~organ development	28	0.0662	7.83042e-09	Bt.2415.1.S1_at, Bt.4903.1.S1_at, Bt.4903.1.S2_at, Bt.137.1.S1_at, Bt.15556.1.A1_s_at, Bt.3686.1.S1_at, Bt.15972.1.S1_at, Bt.1948.1.S1_at, Bt.2129.1.S1_at, Bt.5395.1.S1_a_at, Bt.2129.2.S1_at, Bt.4719.1.S1_at, Bt.24208.1.S1_at, Bt.26265.1.A1_at, Bt.5229.1.S1_at, Bt.2638.1.S1_at, Bt.2047.1.S1_at, Bt.4998.1.S1_at, Bt.5472.1.S1_at, Bt.2220.2.A1_a_at, Bt.4390.1.S1_at, Bt.543.1.S1_at, Bt.2344.1.S1_at, …	2.6075e-05	3.25941e-06	1.42639e-05
GOTERM_BP_ALL	GO:0009653~anatomical structure morphogenesis	21	0.0496	1.35719e-05	Bt.440.1.S1_at, Bt.9958.1.S1_at, Bt.4390.1.S1_at, Bt.4903.1.S1_at, Bt.4903.1.S2_at, Bt.5237.1.S1_at, Bt.137.1.S1_at, Bt.2344.1.S1_at, Bt.15556.1.A1_s_at, Bt.5230.1.S1_at, Bt.13482.1.S1_at, Bt.15972.1.S1_at, Bt.2230.1.S1_at, Bt.3478.1.A1_s_at, Bt.2230.1.S2_at, Bt.4719.1.S1_at, Bt.12750.1.S1_at, Bt.4057.1.S1_at, Bt.5229.1.S1_at, Bt.26265.1.A1_at, Bt.2638.1.S1_at, Bt.422.1.S2_at, Bt.422.1.S1_at, Bt.…	0.0441886	0.00410017	0.0247196
GOTERM_BP_ALL	GO:0009887~organ morphogenesis	10	0.0236	0.000739982	Bt.4719.1.S1_at, Bt.4390.1.S1_at, Bt.12750.1.S1_at, Bt.5229.1.S1_at, Bt.26265.1.A1_at, Bt.4903.1.S1_at, Bt.4903.1.S2_at, Bt.2638.1.S1_at, Bt.137.1.S1_at, Bt.15972.1.S1_at, Bt.23176.2.S1_a_at,	0.914996	0.0938968	1.3394
GOTERM_BP_ALL	GO:0048514~blood vessel morphogenesis	8	0.0189	0.000800298	Bt.4719.1.S1_at, Bt.4390.1.S1_at, Bt.5229.1.S1_at, Bt.26265.1.A1_at, Bt.4903.1.S1_at, Bt.4903.1.S2_at, Bt.2638.1.S1_at, Bt.137.1.S1_at, Bt.15972.1.S1_at,	0.930474	0.0974587	1.44782
GOTERM_BP_ALL	GO:0001568~blood vessel development	8	0.0189	0.00160989	Bt.4719.1.S1_at, Bt.4390.1.S1_at, Bt.5229.1.S1_at, Bt.26265.1.A1_at, Bt.4903.1.S1_at, Bt.4903.1.S2_at, Bt.2638.1.S1_at, Bt.137.1.S1_at, Bt.15972.1.S1_at,	0.995324	0.145981	2.89229
GOTERM_BP_ALL	GO:0001944~vasculature development	8	0.0189	0.00160989	Bt.4719.1.S1_at, Bt.4390.1.S1_at, Bt.5229.1.S1_at, Bt.26265.1.A1_at, Bt.4903.1.S1_at, Bt.4903.1.S2_at, Bt.2638.1.S1_at, Bt.137.1.S1_at, Bt.15972.1.S1_at,	0.995324	0.145981	2.89229
GOTERM_BP_ALL	GO:0045765~regulation of angiogenesis	4	0.0095	0.00556019	Bt.4390.1.S1_at, Bt.5229.1.S1_at, Bt.2638.1.S1_at, Bt.137.1.S1_at,	1	0.320783	9.65794
GOTERM_BP_ALL	GO:0001525~angiogenesis	6	0.0142	0.0064911	Bt.4719.1.S1_at, Bt.4390.1.S1_at, Bt.5229.1.S1_at, Bt.26265.1.A1_at, Bt.2638.1.S1_at, Bt.137.1.S1_at,	1	0.351904	11.1861
GOTERM_BP_ALL	GO:0048646~anatomical structure formation	6	0.0142	0.0120537	Bt.4719.1.S1_at, Bt.4390.1.S1_at, Bt.5229.1.S1_at, Bt.26265.1.A1_at, Bt.2638.1.S1_at, Bt.137.1.S1_at,	1	0.452681	19.8206
Functional Group 8	Median: 0.004157202201156946	Geo: 7.238144473174005E-4	Bt.24345.1.S1_at, Bt.350.1.S1_at, Bt.350.1.S1_x_at, Bt.4342.1.S1_at, Bt.4303.1.S1_at, Bt.6446.1.S1_at, Bt.7478.1.S1_at, Bt.24256.2.S1_a_at, Bt.154.1.S1_at, Bt.28088.1.S1_at, Bt.9217.1.A1_at, Bt.4177.3.A1_at, Bt.3686.1.S1_at, Bt.350.1.S1_x_at, Bt.350.1.S1_at, Bt.15972.1.S1_at, Bt.12112.1.S1_at, Bt.4719.1.S1_at, Bt.4057.1.S1_at, Bt.2017.1.S1_at, Bt.9296.1.A1_at, Bt.4565.1.S1_at, Bt.22978.2.S1_at, B…
Category	Term	Count	%	PValue	Genes	Bonferroni	Benjamini	FDR
GOTERM_BP_ALL	GO:0050896~response to stimulus	48	0.1135	2.13404e-05	Bt.24345.1.S1_at, Bt.350.1.S1_at, Bt.350.1.S1_x_at, Bt.4342.1.S1_at, Bt.4303.1.S1_at, Bt.6446.1.S1_at, Bt.7478.1.S1_at, Bt.24256.2.S1_a_at, Bt.154.1.S1_at, Bt.28088.1.S1_at, Bt.9217.1.A1_at, Bt.4177.3.A1_at, Bt.3686.1.S1_at, Bt.350.1.S1_x_at, Bt.350.1.S1_at, Bt.15972.1.S1_at, Bt.12112.1.S1_at, Bt.4719.1.S1_at, Bt.4057.1.S1_at, Bt.2017.1.S1_at, Bt.9296.1.A1_at, Bt.4565.1.S1_at, Bt.22978.2.S1_at, B…	0.0685979	0.00590451	0.0388664
GOTERM_BP_ALL	GO:0002376~immune system process	23	0.0544	0.0041572	Bt.13556.1.S1_a_at, Bt.13556.2.A1_at, Bt.13556.2.A1_x_at, Bt.24345.1.S1_at, Bt.2408.1.S1_s_at, Bt.2408.1.S1_at, Bt.350.1.S1_at, Bt.350.1.S1_x_at, Bt.4342.1.S1_at, Bt.4303.1.S1_at, Bt.2415.1.S1_at, Bt.154.1.S1_at, Bt.28088.1.S1_at, Bt.611.1.S2_at, Bt.9217.1.A1_at, Bt.3686.1.S1_at, Bt.350.1.S1_x_at, Bt.350.1.S1_at, Bt.350.1.S1_s_at, Bt.1948.1.S1_at, Bt.8140.1.S1_at, Bt.12112.1.S1_at, Bt.9296.1.A1_a…	0.999999	0.275746	7.30776
GOTERM_BP_ALL	GO:0006955~immune response	20	0.0473	0.00427444	Bt.13556.1.S1_a_at, Bt.13556.2.A1_at, Bt.13556.2.A1_x_at, Bt.24345.1.S1_at, Bt.2408.1.S1_s_at, Bt.2408.1.S1_at, Bt.350.1.S1_at, Bt.350.1.S1_x_at, Bt.4303.1.S1_at, Bt.154.1.S1_at, Bt.28088.1.S1_at, Bt.611.1.S2_at, Bt.9217.1.A1_at, Bt.3686.1.S1_at, Bt.350.1.S1_x_at, Bt.350.1.S1_at, Bt.350.1.S1_s_at, Bt.8140.1.S1_at, Bt.12112.1.S1_at, Bt.9296.1.A1_at, Bt.26536.1.S1_at, Bt.4507.1.S1_at, Bt.350.1.S1_x…	0.999999	0.276888	7.50633
Functional Group 9	Median: 0.005171015311543334	Geo: 0.0014743596823184623	Bt.13181.1.S1_a_at, Bt.4342.1.S1_at, Bt.2314.1.S1_at, Bt.154.1.S1_at, Bt.8906.1.S1_at, Bt.2129.1.S1_at, Bt.5395.1.S1_a_at, Bt.2129.2.S1_at, Bt.26764.1.A1_at, Bt.5522.1.S1_at, Bt.16118.1.S1_at, Bt.5398.1.S1_at, Bt.3046.1.S1_at, Bt.23267.1.S1_at, Bt.20238.1.S1_at, Bt.5472.1.S1_at, Bt.29721.1.S1_at, Bt.29721.1.A1_at, Bt.23418.1.S1_at, Bt.4844.1.S1_at,
Category	Term	Count	%	PValue	Genes	Bonferroni	Benjamini	FDR
GOTERM_MF_ALL	GO:0030246~carbohydrate binding	16	0.0378	5.08556e-05	Bt.13181.1.S1_a_at, Bt.4342.1.S1_at, Bt.2314.1.S1_at, Bt.154.1.S1_at, Bt.8906.1.S1_at, Bt.2129.1.S1_at, Bt.5395.1.S1_a_at, Bt.2129.2.S1_at, Bt.26764.1.A1_at, Bt.5522.1.S1_at, Bt.16118.1.S1_at, Bt.5398.1.S1_at, Bt.3046.1.S1_at, Bt.23267.1.S1_at, Bt.20238.1.S1_at, Bt.5472.1.S1_at, Bt.29721.1.S1_at, Bt.29721.1.A1_at, Bt.23418.1.S1_at, Bt.4844.1.S1_at,	0.0897948	0.0232468	0.0866057
GOTERM_MF_ALL	GO:0005529~sugar binding	10	0.0236	0.00517102	Bt.2129.1.S1_at, Bt.5395.1.S1_a_at, Bt.2129.2.S1_at, Bt.13181.1.S1_a_at, Bt.4342.1.S1_at, Bt.26764.1.A1_at, Bt.2314.1.S1_at, Bt.16118.1.S1_at, Bt.3046.1.S1_at, Bt.8906.1.S1_at, Bt.20238.1.S1_at, Bt.5472.1.S1_at,	0.999932	0.431178	8.45371
SP_PIR_KEYWORDS	lectin	7	0.0165	0.012187	Bt.2129.1.S1_at, Bt.5395.1.S1_a_at, Bt.2129.2.S1_at, Bt.13181.1.S1_a_at, Bt.4342.1.S1_at, Bt.26764.1.A1_at, Bt.2314.1.S1_at, Bt.3046.1.S1_at, Bt.5472.1.S1_at,	0.999878	0.559266	16.9829
Functional Group 10	Median: 0.008884362701203607	Geo: 0.002336313245644367	Bt.12445.1.A1_at, Bt.6442.1.S1_at, Bt.2662.1.A1_at, Bt.5309.1.S1_at, Bt.15839.1.S1_at, Bt.8122.1.S1_a_at, Bt.16055.2.S1_a_at, Bt.12477.2.S1_at, Bt.12477.1.S1_a_at, Bt.15906.1.S1_at, Bt.1948.1.S1_at, Bt.4057.1.S1_at, Bt.12906.1.S1_at, Bt.12906.2.S1_at, Bt.3198.1.A1_at, Bt.3198.2.S1_at, Bt.355.1.S1_at, Bt.12825.1.S1_at, Bt.23326.2.A1_at, Bt.18822.1.A1_at, Bt.22857.1.S2_at,
Category	Term	Count	%	PValue	Genes	Bonferroni	Benjamini	FDR
GOTERM_MF_ALL	GO:0003779~actin binding	13	0.0307	7.00732e-05	Bt.12445.1.A1_at, Bt.6442.1.S1_at, Bt.2662.1.A1_at, Bt.5309.1.S1_at, Bt.15839.1.S1_at, Bt.8122.1.S1_a_at, Bt.16055.2.S1_a_at, Bt.12477.2.S1_at, Bt.12477.1.S1_a_at, Bt.15906.1.S1_at, Bt.1948.1.S1_at, Bt.4057.1.S1_at, Bt.12906.1.S1_at, Bt.12906.2.S1_at, Bt.3198.1.A1_at, Bt.3198.2.S1_at, Bt.355.1.S1_at,	0.121588	0.0255947	0.119314
GOTERM_MF_ALL	GO:0008092~cytoskeletal protein binding	14	0.0331	0.000416821	Bt.12445.1.A1_at, Bt.6442.1.S1_at, Bt.2662.1.A1_at, Bt.5309.1.S1_at, Bt.15839.1.S1_at, Bt.8122.1.S1_a_at, Bt.16055.2.S1_a_at, Bt.12477.2.S1_at, Bt.12477.1.S1_a_at, Bt.15906.1.S1_at, Bt.1948.1.S1_at, Bt.4057.1.S1_at, Bt.12906.1.S1_at, Bt.12906.2.S1_at, Bt.3198.1.A1_at, Bt.3198.2.S1_at, Bt.355.1.S1_at, Bt.12825.1.S1_at,	0.537579	0.0677147	0.707756
SP_PIR_KEYWORDS	actin-binding	8	0.0189	0.0173519	Bt.12906.1.S1_at, Bt.12906.2.S1_at, Bt.4057.1.S1_at, Bt.6442.1.S1_at, Bt.355.1.S1_at, Bt.2662.1.A1_at, Bt.5309.1.S1_at, Bt.8122.1.S1_a_at, Bt.12477.2.S1_at, Bt.12477.1.S1_a_at, Bt.1948.1.S1_at,	0.999997	0.628297	23.3329
SP_PIR_KEYWORDS	cytoskeleton	9	0.0213	0.0587862	Bt.23326.2.A1_at, Bt.12906.1.S1_at, Bt.12906.2.S1_at, Bt.6442.1.S1_at, Bt.18822.1.A1_at, Bt.22857.1.S2_at, Bt.2662.1.A1_at, Bt.5309.1.S1_at, Bt.12825.1.S1_at, Bt.8122.1.S1_a_at, Bt.12477.2.S1_at, Bt.12477.1.S1_a_at, Bt.1948.1.S1_at,	1	0.867886	60.1331
Functional Group 11	Median: 0.002041646136727784	Geo: 0.0027276340502564995	Bt.13181.1.S1_a_at, Bt.4342.1.S1_at, Bt.2314.1.S1_at, Bt.154.1.S1_at, Bt.8906.1.S1_at, Bt.2129.1.S1_at, Bt.5395.1.S1_a_at, Bt.2129.2.S1_at, Bt.26764.1.A1_at, Bt.5522.1.S1_at, Bt.16118.1.S1_at, Bt.5398.1.S1_at, Bt.3046.1.S1_at, Bt.23267.1.S1_at, Bt.20238.1.S1_at, Bt.5472.1.S1_at, Bt.29721.1.S1_at, Bt.29721.1.A1_at, Bt.23418.1.S1_at, Bt.4844.1.S1_at,
Category	Term	Count	%	PValue	Genes	Bonferroni	Benjamini	FDR
GOTERM_MF_ALL	GO:0030246~carbohydrate binding	16	0.0378	5.08556e-05	Bt.13181.1.S1_a_at, Bt.4342.1.S1_at, Bt.2314.1.S1_at, Bt.154.1.S1_at, Bt.8906.1.S1_at, Bt.2129.1.S1_at, Bt.5395.1.S1_a_at, Bt.2129.2.S1_at, Bt.26764.1.A1_at, Bt.5522.1.S1_at, Bt.16118.1.S1_at, Bt.5398.1.S1_at, Bt.3046.1.S1_at, Bt.23267.1.S1_at, Bt.20238.1.S1_at, Bt.5472.1.S1_at, Bt.29721.1.S1_at, Bt.29721.1.A1_at, Bt.23418.1.S1_at, Bt.4844.1.S1_at,	0.0897948	0.0232468	0.0866057
GOTERM_MF_ALL	GO:0005539~glycosaminoglycan binding	7	0.0165	0.00130585	Bt.2129.1.S1_at, Bt.5395.1.S1_a_at, Bt.2129.2.S1_at, Bt.5522.1.S1_at, Bt.5398.1.S1_at, Bt.154.1.S1_at, Bt.23267.1.S1_at, Bt.29721.1.S1_at, Bt.29721.1.A1_at, Bt.23418.1.S1_at, Bt.4844.1.S1_at,	0.910847	0.158586	2.20159
GOTERM_MF_ALL	GO:0030247~polysaccharide binding	7	0.0165	0.00168379	Bt.2129.1.S1_at, Bt.5395.1.S1_a_at, Bt.2129.2.S1_at, Bt.5522.1.S1_at, Bt.5398.1.S1_at, Bt.154.1.S1_at, Bt.23267.1.S1_at, Bt.29721.1.S1_at, Bt.29721.1.A1_at, Bt.23418.1.S1_at, Bt.4844.1.S1_at,	0.955738	0.187665	2.83021
GOTERM_MF_ALL	GO:0001871~pattern binding	7	0.0165	0.0023995	Bt.2129.1.S1_at, Bt.5395.1.S1_a_at, Bt.2129.2.S1_at, Bt.5522.1.S1_at, Bt.5398.1.S1_at, Bt.154.1.S1_at, Bt.23267.1.S1_at, Bt.29721.1.S1_at, Bt.29721.1.A1_at, Bt.23418.1.S1_at, Bt.4844.1.S1_at,	0.988256	0.242533	4.01024
GOTERM_MF_ALL	GO:0008201~heparin binding	5	0.0118	0.0105502	Bt.5522.1.S1_at, Bt.5398.1.S1_at, Bt.154.1.S1_at, Bt.29721.1.S1_at, Bt.29721.1.A1_at, Bt.23418.1.S1_at, Bt.4844.1.S1_at,	1	0.625094	16.5311
SP_PIR_KEYWORDS	heparin-binding	4	0.0095	0.145484	Bt.5522.1.S1_at, Bt.154.1.S1_at, Bt.29721.1.S1_at, Bt.29721.1.A1_at, Bt.23418.1.S1_at, Bt.4844.1.S1_at,	1	0.948335	90.8044
Functional Group 12	Median: 0.023923177826975537	Geo: 0.0028096623218799546	Bt.4342.1.S1_at, Bt.4390.1.S1_at, Bt.4057.1.S1_at, Bt.4903.1.S1_at, Bt.4903.1.S2_at, Bt.543.1.S1_at, Bt.13039.1.A1_at, Bt.13039.1.S1_at, Bt.8122.1.S1_a_at, Bt.4653.1.S2_at, Bt.15972.1.S1_at, Bt.8140.1.S1_at,
Category	Term	Count	%	PValue	Genes	Bonferroni	Benjamini	FDR
GOTERM_BP_ALL	GO:0016477~cell migration	10	0.0236	4.17201e-05	Bt.4342.1.S1_at, Bt.4390.1.S1_at, Bt.4057.1.S1_at, Bt.4903.1.S1_at, Bt.4903.1.S2_at, Bt.543.1.S1_at, Bt.13039.1.A1_at, Bt.13039.1.S1_at, Bt.8122.1.S1_a_at, Bt.4653.1.S2_at, Bt.15972.1.S1_at, Bt.8140.1.S1_at,	0.129712	0.00987455	0.07597
GOTERM_BP_ALL	GO:0006928~cell motility	10	0.0236	0.000164082	Bt.4342.1.S1_at, Bt.4390.1.S1_at, Bt.4057.1.S1_at, Bt.4903.1.S1_at, Bt.4903.1.S2_at, Bt.543.1.S1_at, Bt.13039.1.A1_at, Bt.13039.1.S1_at, Bt.8122.1.S1_a_at, Bt.4653.1.S2_at, Bt.15972.1.S1_at, Bt.8140.1.S1_at,	0.420991	0.0299014	0.298469
GOTERM_BP_ALL	GO:0051674~localization of cell	10	0.0236	0.000164082	Bt.4342.1.S1_at, Bt.4390.1.S1_at, Bt.4057.1.S1_at, Bt.4903.1.S1_at, Bt.4903.1.S2_at, Bt.543.1.S1_at, Bt.13039.1.A1_at, Bt.13039.1.S1_at, Bt.8122.1.S1_a_at, Bt.4653.1.S2_at, Bt.15972.1.S1_at, Bt.8140.1.S1_at,	0.420991	0.0299014	0.298469
GOTERM_BP_ALL	GO:0030334~regulation of cell migration	4	0.0095	0.0239232	Bt.4390.1.S1_at, Bt.13039.1.A1_at, Bt.13039.1.S1_at, Bt.8122.1.S1_a_at, Bt.4653.1.S2_at,	1	0.630448	35.666
GOTERM_BP_ALL	GO:0051270~regulation of cell motility	4	0.0095	0.0308614	Bt.4390.1.S1_at, Bt.13039.1.A1_at, Bt.13039.1.S1_at, Bt.8122.1.S1_a_at, Bt.4653.1.S2_at,	1	0.694628	43.5056
GOTERM_BP_ALL	GO:0040012~regulation of locomotion	4	0.0095	0.0387396	Bt.4390.1.S1_at, Bt.13039.1.A1_at, Bt.13039.1.S1_at, Bt.8122.1.S1_a_at, Bt.4653.1.S2_at,	1	0.753319	51.3108
GOTERM_BP_ALL	GO:0040011~locomotion	4	0.0095	0.0430253	Bt.4390.1.S1_at, Bt.13039.1.A1_at, Bt.13039.1.S1_at, Bt.8122.1.S1_a_at, Bt.4653.1.S2_at,	1	0.762066	55.1169
Functional Group 13	Median: 0.1788373064370649	Geo: 0.0032899320825766493	Bt.9958.1.S1_at, Bt.16018.1.S2_at, Bt.4903.1.S1_at, Bt.4903.1.S2_at, Bt.5237.1.S1_at, Bt.137.1.S1_at, Bt.11476.1.S1_at, Bt.18280.1.S1_at, Bt.3686.1.S1_at, Bt.15972.1.S1_at, Bt.1948.1.S1_at, Bt.2129.1.S1_at, Bt.5395.1.S1_a_at, Bt.2129.2.S1_at, Bt.17161.1.S1_at, Bt.1303.1.S1_at, Bt.4565.1.S1_at, Bt.615.1.S1_at, Bt.5598.1.S1_at, Bt.5472.1.S1_at, Bt.5226.1.S1_at, Bt.4390.1.S1_at, Bt.14176.2.S1_at, Bt…
Category	Term	Count	%	PValue	Genes	Bonferroni	Benjamini	FDR
GOTERM_BP_ALL	GO:0032502~developmental process	55	0.13	1.12542e-10	Bt.9958.1.S1_at, Bt.16018.1.S2_at, Bt.4903.1.S1_at, Bt.4903.1.S2_at, Bt.5237.1.S1_at, Bt.137.1.S1_at, Bt.11476.1.S1_at, Bt.18280.1.S1_at, Bt.3686.1.S1_at, Bt.15972.1.S1_at, Bt.1948.1.S1_at, Bt.2129.1.S1_at, Bt.5395.1.S1_a_at, Bt.2129.2.S1_at, Bt.17161.1.S1_at, Bt.1303.1.S1_at, Bt.4565.1.S1_at, Bt.615.1.S1_at, Bt.5598.1.S1_at, Bt.5472.1.S1_at, Bt.5226.1.S1_at, Bt.4390.1.S1_at, Bt.14176.2.S1_at, Bt…	3.74766e-07	7.49532e-08	2.05007e-07
GOTERM_BP_ALL	GO:0048856~anatomical structure development	37	0.0875	1.0379e-09	Bt.440.1.S1_at, Bt.9958.1.S1_at, Bt.2415.1.S1_at, Bt.4903.1.S1_at, Bt.4903.1.S2_at, Bt.5237.1.S1_at, Bt.137.1.S1_at, Bt.3686.1.S1_at, Bt.15556.1.A1_s_at, Bt.13482.1.S1_at, Bt.15972.1.S1_at, Bt.1948.1.S1_at, Bt.2129.1.S1_at, Bt.5395.1.S1_a_at, Bt.2129.2.S1_at, Bt.12112.1.S1_at, Bt.2230.1.S1_at, Bt.3478.1.A1_s_at, Bt.2230.1.S2_at, Bt.4719.1.S1_at, Bt.4057.1.S1_at, Bt.24208.1.S1_at, Bt.5229.1.S1_at,…	3.45621e-06	5.76036e-07	1.89064e-06
GOTERM_BP_ALL	GO:0048731~system development	31	0.0733	1.07115e-08	Bt.2415.1.S1_at, Bt.4903.1.S1_at, Bt.4903.1.S2_at, Bt.137.1.S1_at, Bt.3686.1.S1_at, Bt.15556.1.A1_s_at, Bt.15972.1.S1_at, Bt.1948.1.S1_at, Bt.2129.1.S1_at, Bt.5395.1.S1_a_at, Bt.2129.2.S1_at, Bt.12112.1.S1_at, Bt.4719.1.S1_at, Bt.4057.1.S1_at, Bt.24208.1.S1_at, Bt.26265.1.A1_at, Bt.5229.1.S1_at, Bt.2638.1.S1_at, Bt.2047.1.S1_at, Bt.4998.1.S1_at, Bt.5472.1.S1_at, Bt.2220.2.A1_a_at, Bt.4390.1.S1_at…	3.56687e-05	3.96325e-06	1.95121e-05
GOTERM_BP_ALL	GO:0048468~cell development	23	0.0544	0.000150392	Bt.3890.1.S1_at, Bt.5027.1.A1_at, Bt.16018.1.S2_at, Bt.4903.1.S1_at, Bt.4903.1.S2_at, Bt.14176.2.S1_at, Bt.14176.1.S1_at, Bt.435.1.S1_at, Bt.543.1.S1_at, Bt.2344.1.S1_at, Bt.9973.1.S2_at, Bt.3686.1.S1_at, Bt.15972.1.S1_at, Bt.1948.1.S1_at, Bt.8140.1.S1_at, Bt.12112.1.S1_at, Bt.4719.1.S1_at, Bt.12750.1.S1_at, Bt.4057.1.S1_at, Bt.2638.1.S1_at, Bt.422.1.S2_at, Bt.422.1.S1_at, Bt.12825.1.S1_at, Bt.61…	0.39398	0.0290315	0.273599
GOTERM_BP_ALL	GO:0030154~cell differentiation	27	0.0638	0.000899971	Bt.16018.1.S2_at, Bt.2415.1.S1_at, Bt.4903.1.S1_at, Bt.4903.1.S2_at, Bt.137.1.S1_at, Bt.3686.1.S1_at, Bt.15972.1.S1_at, Bt.1948.1.S1_at, Bt.12112.1.S1_at, Bt.4719.1.S1_at, Bt.4057.1.S1_at, Bt.2638.1.S1_at, Bt.615.1.S1_at, Bt.5598.1.S1_at, Bt.5226.1.S1_at, Bt.5472.1.S1_at, Bt.3890.1.S1_at, Bt.5027.1.A1_at, Bt.14176.2.S1_at, Bt.14176.1.S1_at, Bt.435.1.S1_at, Bt.543.1.S1_at, Bt.2344.1.S1_at, Bt.9973…	0.950126	0.105103	1.62675
GOTERM_BP_ALL	GO:0048869~cellular developmental process	27	0.0638	0.000899971	Bt.16018.1.S2_at, Bt.2415.1.S1_at, Bt.4903.1.S1_at, Bt.4903.1.S2_at, Bt.137.1.S1_at, Bt.3686.1.S1_at, Bt.15972.1.S1_at, Bt.1948.1.S1_at, Bt.12112.1.S1_at, Bt.4719.1.S1_at, Bt.4057.1.S1_at, Bt.2638.1.S1_at, Bt.615.1.S1_at, Bt.5598.1.S1_at, Bt.5226.1.S1_at, Bt.5472.1.S1_at, Bt.3890.1.S1_at, Bt.5027.1.A1_at, Bt.14176.2.S1_at, Bt.14176.1.S1_at, Bt.435.1.S1_at, Bt.543.1.S1_at, Bt.2344.1.S1_at, Bt.9973…	0.950126	0.105103	1.62675
GOTERM_BP_ALL	GO:0048522~positive regulation of cellular process	15	0.0355	0.0021164	Bt.3890.1.S1_at, Bt.16018.1.S2_at, Bt.2415.1.S1_at, Bt.2344.1.S1_at, Bt.9973.1.S2_at, Bt.3686.1.S1_at, Bt.15972.1.S1_at, Bt.8140.1.S1_at, Bt.12112.1.S1_at, Bt.354.1.S1_at, Bt.26265.1.A1_at, Bt.2047.1.S1_at, Bt.422.1.S2_at, Bt.422.1.S1_at, Bt.4001.1.S1_at, Bt.5472.1.S1_at,	0.999137	0.173602	3.7858
GOTERM_BP_ALL	GO:0008219~cell death	12	0.0284	0.11889	Bt.3890.1.S1_at, Bt.12112.1.S1_at, Bt.5027.1.A1_at, Bt.12750.1.S1_at, Bt.16018.1.S2_at, Bt.422.1.S2_at, Bt.422.1.S1_at, Bt.2344.1.S1_at, Bt.209.3.S1_at, Bt.615.1.S1_at, Bt.5598.1.S1_at, Bt.3686.1.S1_at, Bt.8140.1.S1_at,	1	0.958955	90.0307
GOTERM_BP_ALL	GO:0016265~death	12	0.0284	0.11889	Bt.3890.1.S1_at, Bt.12112.1.S1_at, Bt.5027.1.A1_at, Bt.12750.1.S1_at, Bt.16018.1.S2_at, Bt.422.1.S2_at, Bt.422.1.S1_at, Bt.2344.1.S1_at, Bt.209.3.S1_at, Bt.615.1.S1_at, Bt.5598.1.S1_at, Bt.3686.1.S1_at, Bt.8140.1.S1_at,	1	0.958955	90.0307
GOTERM_BP_ALL	GO:0006915~apoptosis	10	0.0236	0.238784	Bt.3890.1.S1_at, Bt.12112.1.S1_at, Bt.5027.1.A1_at, Bt.12750.1.S1_at, Bt.16018.1.S2_at, Bt.422.1.S2_at, Bt.422.1.S1_at, Bt.2344.1.S1_at, Bt.5598.1.S1_at, Bt.3686.1.S1_at, Bt.8140.1.S1_at,	1	0.995225	99.3057
GOTERM_BP_ALL	GO:0012501~programmed cell death	10	0.0236	0.247059	Bt.3890.1.S1_at, Bt.12112.1.S1_at, Bt.5027.1.A1_at, Bt.12750.1.S1_at, Bt.16018.1.S2_at, Bt.422.1.S2_at, Bt.422.1.S1_at, Bt.2344.1.S1_at, Bt.5598.1.S1_at, Bt.3686.1.S1_at, Bt.8140.1.S1_at,	1	0.996018	99.431
SP_PIR_KEYWORDS	apoptosis	4	0.0095	0.364047	Bt.3890.1.S1_at, Bt.5027.1.A1_at, Bt.16018.1.S2_at, Bt.5598.1.S1_at,	1	0.998874	99.8962
GOTERM_BP_ALL	GO:0043065~positive regulation of apoptosis	3	0.0071	0.472642	Bt.16018.1.S2_at, Bt.422.1.S2_at, Bt.422.1.S1_at, Bt.2344.1.S1_at,	1	0.999963	99.9991
GOTERM_BP_ALL	GO:0043068~positive regulation of programmed cell death	3	0.0071	0.472642	Bt.16018.1.S2_at, Bt.422.1.S2_at, Bt.422.1.S1_at, Bt.2344.1.S1_at,	1	0.999963	99.9991
GOTERM_BP_ALL	GO:0042981~regulation of apoptosis	6	0.0142	0.474642	Bt.12750.1.S1_at, Bt.16018.1.S2_at, Bt.422.1.S2_at, Bt.422.1.S1_at, Bt.2344.1.S1_at, Bt.3686.1.S1_at, Bt.8140.1.S1_at,	1	0.999959	99.9992
GOTERM_BP_ALL	GO:0043067~regulation of programmed cell death	6	0.0142	0.486876	Bt.12750.1.S1_at, Bt.16018.1.S2_at, Bt.422.1.S2_at, Bt.422.1.S1_at, Bt.2344.1.S1_at, Bt.3686.1.S1_at, Bt.8140.1.S1_at,	1	0.999969	99.9995
GOTERM_BP_ALL	GO:0043066~negative regulation of apoptosis	3	0.0071	0.631058	Bt.12750.1.S1_at, Bt.3686.1.S1_at, Bt.8140.1.S1_at,	1	0.999999	100
GOTERM_BP_ALL	GO:0043069~negative regulation of programmed cell death	3	0.0071	0.639127	Bt.12750.1.S1_at, Bt.3686.1.S1_at, Bt.8140.1.S1_at,	1	1	100
Functional Group 14	Median: 0.005206338588387001	Geo: 0.003810138661470729	Bt.25836.1.A1_at, Bt.13181.1.S1_a_at, Bt.26764.1.A1_at, Bt.4703.1.S1_at,
Category	Term	Count	%	PValue	Genes	Bonferroni	Benjamini	FDR
INTERPRO	IPR003112:Olfactomedin-like	4	0.0095	0.000799886	Bt.25836.1.A1_at, Bt.13181.1.S1_a_at, Bt.26764.1.A1_at, Bt.4703.1.S1_at,	0.932626	0.362106	1.44902
SMART	SM00284:OLF	4	0.0095	0.000996505	Bt.25836.1.A1_at, Bt.13181.1.S1_a_at, Bt.26764.1.A1_at, Bt.4703.1.S1_at,	0.390132	0.151969	1.42387
GOTERM_MF_ALL	GO:0016524~latrotoxin receptor activity	3	0.0071	0.00520634	Bt.13181.1.S1_a_at, Bt.26764.1.A1_at, Bt.4703.1.S1_at,	0.999936	0.415205	8.50907
INTERPRO	IPR003924:Latrophilin receptor	3	0.0071	0.0101921	Bt.13181.1.S1_a_at, Bt.26764.1.A1_at, Bt.4703.1.S1_at,	1	0.853181	17.0443
UP_SEQ_FEATURE	domain:Olfactomedin-like	3	0.0071	0.0189845	Bt.13181.1.S1_a_at, Bt.26764.1.A1_at, Bt.4703.1.S1_at,	1	1	29.5988
Functional Group 15	Median: 0.0025531236928688717	Geo: 0.004798619098301253	Bt.4939.1.S1_at, Bt.14176.2.S1_at, Bt.14176.1.S1_at, Bt.435.1.S1_at, Bt.4507.1.S1_at, Bt.5136.1.S1_at, Bt.5226.1.S1_at,
Category	Term	Count	%	PValue	Genes	Bonferroni	Benjamini	FDR
INTERPRO	IPR001134:Netrin, C-terminal	5	0.0118	0.00194295	Bt.4939.1.S1_at, Bt.14176.2.S1_at, Bt.14176.1.S1_at, Bt.435.1.S1_at, Bt.4507.1.S1_at, Bt.5136.1.S1_at, Bt.5226.1.S1_at,	0.998579	0.480873	3.48531
SMART	SM00643:C345C	5	0.0118	0.00255312	Bt.4939.1.S1_at, Bt.14176.2.S1_at, Bt.14176.1.S1_at, Bt.435.1.S1_at, Bt.4507.1.S1_at, Bt.5136.1.S1_at, Bt.5226.1.S1_at,	0.718597	0.271664	3.61036
UP_SEQ_FEATURE	domain:NTR	4	0.0095	0.0222748	Bt.14176.2.S1_at, Bt.14176.1.S1_at, Bt.435.1.S1_at, Bt.4507.1.S1_at, Bt.5136.1.S1_at, Bt.5226.1.S1_at,	1	0.999998	33.7992
Functional Group 16	Median: 0.005107859944565373	Geo: 0.00491929989959509	Bt.2220.2.A1_a_at, Bt.4057.1.S1_at, Bt.12750.1.S1_at, Bt.26265.1.A1_at, Bt.4903.1.S1_at, Bt.4903.1.S2_at, Bt.2638.1.S1_at, Bt.14176.2.S1_at, Bt.14176.1.S1_at, Bt.435.1.S1_at, Bt.543.1.S1_at, Bt.15556.1.A1_s_at, Bt.15972.1.S1_at,
Category	Term	Count	%	PValue	Genes	Bonferroni	Benjamini	FDR
GOTERM_BP_ALL	GO:0007399~nervous system development	10	0.0236	0.00206435	Bt.2220.2.A1_a_at, Bt.4057.1.S1_at, Bt.12750.1.S1_at, Bt.26265.1.A1_at, Bt.4903.1.S1_at, Bt.4903.1.S2_at, Bt.2638.1.S1_at, Bt.14176.2.S1_at, Bt.14176.1.S1_at, Bt.435.1.S1_at, Bt.543.1.S1_at, Bt.15556.1.A1_s_at, Bt.15972.1.S1_at,	0.998973	0.173991	3.69434
GOTERM_BP_ALL	GO:0022008~neurogenesis	7	0.0165	0.00465553	Bt.4057.1.S1_at, Bt.12750.1.S1_at, Bt.4903.1.S1_at, Bt.4903.1.S2_at, Bt.2638.1.S1_at, Bt.14176.2.S1_at, Bt.14176.1.S1_at, Bt.435.1.S1_at, Bt.543.1.S1_at, Bt.15972.1.S1_at,	1	0.286667	8.14905
GOTERM_BP_ALL	GO:0001764~neuron migration	4	0.0095	0.00556019	Bt.4057.1.S1_at, Bt.4903.1.S1_at, Bt.4903.1.S2_at, Bt.543.1.S1_at, Bt.15972.1.S1_at,	1	0.320783	9.65794
GOTERM_BP_ALL	GO:0048699~generation of neurons	6	0.0142	0.010959	Bt.4057.1.S1_at, Bt.4903.1.S1_at, Bt.4903.1.S2_at, Bt.2638.1.S1_at, Bt.14176.2.S1_at, Bt.14176.1.S1_at, Bt.435.1.S1_at, Bt.543.1.S1_at, Bt.15972.1.S1_at,	1	0.43637	18.1867
Functional Group 17	Median: 0.0057560209379484886	Geo: 0.006585563411628515	Bt.5267.1.S1_at, Bt.4342.1.S1_at, Bt.5351.1.S1_a_at, Bt.2638.1.S1_at, Bt.4430.1.S2_at, Bt.7552.1.S1_at, Bt.7046.1.S1_at, Bt.13989.3.S1_at, Bt.13989.1.A1_at, Bt.12302.1.S1_at, Bt.24256.2.S1_a_at, Bt.9973.1.S2_at, Bt.17926.1.A1_at, Bt.23348.1.S1_a_at, Bt.23514.1.S1_at,
Category	Term	Count	%	PValue	Genes	Bonferroni	Benjamini	FDR
GOTERM_CC_ALL	GO:0016023~cytoplasmic membrane-bound vesicle	12	0.0284	0.00203324	Bt.5267.1.S1_at, Bt.4342.1.S1_at, Bt.5351.1.S1_a_at, Bt.2638.1.S1_at, Bt.4430.1.S2_at, Bt.7552.1.S1_at, Bt.7046.1.S1_at, Bt.13989.3.S1_at, Bt.13989.1.A1_at, Bt.12302.1.S1_at, Bt.24256.2.S1_a_at, Bt.9973.1.S2_at, Bt.17926.1.A1_at,	0.680108	0.0984282	2.93371
GOTERM_CC_ALL	GO:0031988~membrane-bound vesicle	12	0.0284	0.00217776	Bt.5267.1.S1_at, Bt.4342.1.S1_at, Bt.5351.1.S1_a_at, Bt.2638.1.S1_at, Bt.4430.1.S2_at, Bt.7552.1.S1_at, Bt.7046.1.S1_at, Bt.13989.3.S1_at, Bt.13989.1.A1_at, Bt.12302.1.S1_at, Bt.24256.2.S1_a_at, Bt.9973.1.S2_at, Bt.17926.1.A1_at,	0.705029	0.0967354	3.13916
GOTERM_CC_ALL	GO:0031410~cytoplasmic vesicle	13	0.0307	0.00560598	Bt.5267.1.S1_at, Bt.4342.1.S1_at, Bt.5351.1.S1_a_at, Bt.12302.1.S1_at, Bt.13989.3.S1_at, Bt.13989.1.A1_at, Bt.24256.2.S1_a_at, Bt.9973.1.S2_at, Bt.17926.1.A1_at, Bt.7552.1.S1_at, Bt.4430.1.S2_at, Bt.2638.1.S1_at, Bt.7046.1.S1_at, Bt.23348.1.S1_a_at, Bt.23514.1.S1_at,	0.95707	0.215076	7.89536
GOTERM_CC_ALL	GO:0031982~vesicle	13	0.0307	0.00590606	Bt.5267.1.S1_at, Bt.4342.1.S1_at, Bt.5351.1.S1_a_at, Bt.12302.1.S1_at, Bt.13989.3.S1_at, Bt.13989.1.A1_at, Bt.24256.2.S1_a_at, Bt.9973.1.S2_at, Bt.17926.1.A1_at, Bt.7552.1.S1_at, Bt.4430.1.S2_at, Bt.2638.1.S1_at, Bt.7046.1.S1_at, Bt.23348.1.S1_a_at, Bt.23514.1.S1_at,	0.963746	0.210964	8.30115
GOTERM_CC_ALL	GO:0042470~melanosome	6	0.0142	0.0235887	Bt.5267.1.S1_at, Bt.2638.1.S1_at, Bt.4430.1.S2_at, Bt.7046.1.S1_at, Bt.9973.1.S2_at, Bt.17926.1.A1_at,	0.999998	0.440783	29.4771
GOTERM_CC_ALL	GO:0048770~pigment granule	6	0.0142	0.0235887	Bt.5267.1.S1_at, Bt.2638.1.S1_at, Bt.4430.1.S2_at, Bt.7046.1.S1_at, Bt.9973.1.S2_at, Bt.17926.1.A1_at,	0.999998	0.440783	29.4771
Functional Group 18	Median: 0.002000384711282401	Geo: 0.006772871999618976	Bt.22534.1.S1_at, Bt.26612.2.S1_at, Bt.2415.1.S1_at, Bt.14176.2.S1_at, Bt.14176.1.S1_at, Bt.435.1.S1_at, Bt.6446.1.S1_at, Bt.13989.3.S1_at, Bt.13989.1.A1_at, Bt.9973.1.S2_at, Bt.15556.1.A1_s_at, Bt.3686.1.S1_at, Bt.5230.1.S1_at, Bt.15972.1.S1_at, Bt.8140.1.S1_at, Bt.2230.1.S1_at, Bt.3478.1.A1_s_at, Bt.2230.1.S2_at, Bt.4719.1.S1_at, Bt.12906.1.S1_at, Bt.12906.2.S1_at, Bt.22002.1.S1_at, Bt.97.1.S1_…
Category	Term	Count	%	PValue	Genes	Bonferroni	Benjamini	FDR
GOTERM_BP_ALL	GO:0048523~negative regulation of cellular process	19	0.0449	0.000625856	Bt.22534.1.S1_at, Bt.26612.2.S1_at, Bt.2415.1.S1_at, Bt.14176.2.S1_at, Bt.14176.1.S1_at, Bt.435.1.S1_at, Bt.6446.1.S1_at, Bt.13989.3.S1_at, Bt.13989.1.A1_at, Bt.9973.1.S2_at, Bt.15556.1.A1_s_at, Bt.3686.1.S1_at, Bt.5230.1.S1_at, Bt.15972.1.S1_at, Bt.8140.1.S1_at, Bt.2230.1.S1_at, Bt.3478.1.A1_s_at, Bt.2230.1.S2_at, Bt.4719.1.S1_at, Bt.12906.1.S1_at, Bt.12906.2.S1_at, Bt.22002.1.S1_at, Bt.97.1.S1_…	0.875662	0.0831989	1.13394
GOTERM_BP_ALL	GO:0048519~negative regulation of biological process	19	0.0449	0.00137738	Bt.22534.1.S1_at, Bt.26612.2.S1_at, Bt.2415.1.S1_at, Bt.14176.2.S1_at, Bt.14176.1.S1_at, Bt.435.1.S1_at, Bt.6446.1.S1_at, Bt.13989.3.S1_at, Bt.13989.1.A1_at, Bt.9973.1.S2_at, Bt.15556.1.A1_s_at, Bt.3686.1.S1_at, Bt.5230.1.S1_at, Bt.15972.1.S1_at, Bt.8140.1.S1_at, Bt.2230.1.S1_at, Bt.3478.1.A1_s_at, Bt.2230.1.S2_at, Bt.4719.1.S1_at, Bt.12906.1.S1_at, Bt.12906.2.S1_at, Bt.22002.1.S1_at, Bt.97.1.S1_…	0.989846	0.133621	2.47951
GOTERM_BP_ALL	GO:0009892~negative regulation of metabolic process	9	0.0213	0.00262338	Bt.2230.1.S1_at, Bt.3478.1.A1_s_at, Bt.2230.1.S2_at, Bt.4719.1.S1_at, Bt.12906.1.S1_at, Bt.12906.2.S1_at, Bt.22002.1.S1_at, Bt.97.1.S1_at, Bt.2415.1.S1_at, Bt.4250.2.S1_at, Bt.3686.1.S1_at, Bt.15556.1.A1_s_at, Bt.5230.1.S1_at,	0.999841	0.196424	4.67235
GOTERM_BP_ALL	GO:0019222~regulation of metabolic process	23	0.0544	0.930464	Bt.3890.1.S1_at, Bt.5027.1.A1_at, Bt.2415.1.S1_at, Bt.4903.1.S1_at, Bt.4903.1.S2_at, Bt.14176.2.S1_at, Bt.14176.1.S1_at, Bt.435.1.S1_at, Bt.543.1.S1_at, Bt.3686.1.S1_at, Bt.15556.1.A1_s_at, Bt.5230.1.S1_at, Bt.15972.1.S1_at, Bt.2230.1.S1_at, Bt.3478.1.A1_s_at, Bt.2230.1.S2_at, Bt.4719.1.S1_at, Bt.354.1.S1_at, Bt.17161.1.S1_at, Bt.1303.1.S1_at, Bt.12906.1.S1_at, Bt.12906.2.S1_at, Bt.22002.1.S1_at,…	1	1	100
Functional Group 19	Median: 0.02346097942837187	Geo: 0.00762999425600706	Bt.5021.1.S1_at, Bt.12912.1.S1_at, Bt.12912.1.S2_at, Bt.8124.1.S1_at, Bt.8124.1.S2_at, Bt.5361.2.S1_a_at, Bt.23318.1.S1_at, Bt.23318.1.S2_at, Bt.8549.1.S1_at, Bt.28583.1.S1_s_at, Bt.8549.1.S2_at, Bt.28583.1.S1_s_at, Bt.5398.1.S1_at, Bt.2452.1.S1_at, Bt.4482.2.S1_a_at, Bt.11942.1.S1_at, Bt.13122.1.S1_at, Bt.13122.1.A1_at, Bt.3046.1.S1_at, Bt.11324.1.A1_s_at, Bt.10442.2.A1_at, Bt.23326.2.A1_at, Bt.…
Category	Term	Count	%	PValue	Genes	Bonferroni	Benjamini	FDR
GOTERM_MF_ALL	GO:0005201~extracellular matrix structural constituent	7	0.0165	1.91399e-05	Bt.5021.1.S1_at, Bt.12912.1.S1_at, Bt.12912.1.S2_at, Bt.8124.1.S1_at, Bt.8124.1.S2_at, Bt.5361.2.S1_a_at, Bt.23318.1.S1_at, Bt.23318.1.S2_at, Bt.8549.1.S1_at, Bt.28583.1.S1_s_at, Bt.8549.1.S2_at, Bt.28583.1.S1_s_at,	0.0347896	0.0117337	0.032603
GOTERM_CC_ALL	GO:0005581~collagen	7	0.0165	2.8704e-05	Bt.12912.1.S1_at, Bt.12912.1.S2_at, Bt.8124.1.S1_at, Bt.8124.1.S2_at, Bt.5398.1.S1_at, Bt.23318.1.S1_at, Bt.23318.1.S2_at, Bt.2452.1.S1_at, Bt.8549.1.S1_at, Bt.28583.1.S1_s_at, Bt.8549.1.S2_at, Bt.28583.1.S1_s_at,	0.0159459	0.00267549	0.041985
SP_PIR_KEYWORDS	collagen	10	0.0236	5.5041e-05	Bt.4482.2.S1_a_at, Bt.11942.1.S1_at, Bt.12912.1.S1_at, Bt.12912.1.S2_at, Bt.8124.1.S1_at, Bt.8124.1.S2_at, Bt.13122.1.S1_at, Bt.13122.1.A1_at, Bt.3046.1.S1_at, Bt.23318.1.S1_at, Bt.23318.1.S2_at, Bt.8549.1.S1_at, Bt.28583.1.S1_s_at, Bt.8549.1.S2_at, Bt.28583.1.S1_s_at, Bt.11324.1.A1_s_at, Bt.10442.2.A1_at,	0.0396488	0.00576279	0.0835146
INTERPRO	IPR008160:Collagen triple helix repeat	8	0.0189	0.00153016	Bt.4482.2.S1_a_at, Bt.12912.1.S1_at, Bt.12912.1.S2_at, Bt.8124.1.S1_at, Bt.8124.1.S2_at, Bt.13122.1.S1_at, Bt.13122.1.A1_at, Bt.3046.1.S1_at, Bt.23318.1.S1_at, Bt.23318.1.S2_at, Bt.8549.1.S1_at, Bt.28583.1.S1_s_at, Bt.8549.1.S2_at, Bt.11324.1.A1_s_at, Bt.10442.2.A1_at,	0.994271	0.43649	2.75458
GOTERM_BP_ALL	GO:0006817~phosphate transport	8	0.0189	0.00268073	Bt.4482.2.S1_a_at, Bt.12912.1.S1_at, Bt.12912.1.S2_at, Bt.8124.1.S1_at, Bt.8124.1.S2_at, Bt.13122.1.S1_at, Bt.13122.1.A1_at, Bt.3046.1.S1_at, Bt.23318.1.S1_at, Bt.23318.1.S2_at, Bt.8549.1.S1_at, Bt.28583.1.S1_s_at, Bt.8549.1.S2_at, Bt.11324.1.A1_s_at, Bt.10442.2.A1_at,	0.999869	0.195891	4.77215
SMART	SM00038:COLFI	4	0.0095	0.00754281	Bt.8124.1.S1_at, Bt.8124.1.S2_at, Bt.23318.1.S1_at, Bt.23318.1.S2_at, Bt.8549.1.S1_at, Bt.28583.1.S1_s_at, Bt.8549.1.S2_at, Bt.28583.1.S1_s_at,	0.976609	0.528145	10.3187
GOTERM_BP_ALL	GO:0015698~inorganic anion transport	8	0.0189	0.0221823	Bt.4482.2.S1_a_at, Bt.12912.1.S1_at, Bt.12912.1.S2_at, Bt.8124.1.S1_at, Bt.8124.1.S2_at, Bt.13122.1.S1_at, Bt.13122.1.A1_at, Bt.3046.1.S1_at, Bt.23318.1.S1_at, Bt.23318.1.S2_at, Bt.8549.1.S1_at, Bt.28583.1.S1_s_at, Bt.8549.1.S2_at, Bt.11324.1.A1_s_at, Bt.10442.2.A1_at,	1	0.611536	33.5435
INTERPRO	IPR008161:Collagen helix repeat	5	0.0118	0.023461	Bt.4482.2.S1_a_at, Bt.12912.1.S1_at, Bt.12912.1.S2_at, Bt.8124.1.S1_at, Bt.8124.1.S2_at, Bt.13122.1.S1_at, Bt.13122.1.A1_at, Bt.23318.1.S1_at, Bt.23318.1.S2_at,	1	0.953951	35.1466
INTERPRO	IPR000885:Fibrillar collagen, C-terminal	3	0.0071	0.0452219	Bt.8124.1.S1_at, Bt.8124.1.S2_at, Bt.8549.1.S1_at, Bt.28583.1.S1_s_at, Bt.8549.1.S2_at, Bt.28583.1.S1_s_at,	1	0.991149	57.0057
GOTERM_BP_ALL	GO:0006820~anion transport	8	0.0189	0.0591978	Bt.4482.2.S1_a_at, Bt.12912.1.S1_at, Bt.12912.1.S2_at, Bt.8124.1.S1_at, Bt.8124.1.S2_at, Bt.13122.1.S1_at, Bt.13122.1.A1_at, Bt.3046.1.S1_at, Bt.23318.1.S1_at, Bt.23318.1.S2_at, Bt.8549.1.S1_at, Bt.28583.1.S1_s_at, Bt.8549.1.S2_at, Bt.11324.1.A1_s_at, Bt.10442.2.A1_at,	1	0.847642	67.0962
SP_PIR_KEYWORDS	structural protein	6	0.0142	0.0661523	Bt.23326.2.A1_at, Bt.12912.1.S1_at, Bt.12912.1.S2_at, Bt.12825.1.S1_at, Bt.8124.1.S1_at, Bt.8124.1.S2_at, Bt.5361.2.S1_a_at, Bt.23318.1.S1_at, Bt.23318.1.S2_at,	1	0.877057	64.6151
SP_PIR_KEYWORDS	triple helix	3	0.0071	0.0744122	Bt.12912.1.S1_at, Bt.12912.1.S2_at, Bt.8124.1.S1_at, Bt.8124.1.S2_at, Bt.23318.1.S1_at, Bt.23318.1.S2_at,	1	0.878154	69.0792
SP_PIR_KEYWORDS	hydroxylation	5	0.0118	0.0926157	Bt.5366.1.S1_at, Bt.12912.1.S1_at, Bt.12912.1.S2_at, Bt.8124.1.S1_at, Bt.8124.1.S2_at, Bt.5361.2.S1_a_at, Bt.23318.1.S1_at, Bt.23318.1.S2_at,	1	0.907555	77.1277
SP_PIR_KEYWORDS	trimer	3	0.0071	0.110876	Bt.12912.1.S1_at, Bt.12912.1.S2_at, Bt.8124.1.S1_at, Bt.8124.1.S2_at, Bt.23318.1.S1_at, Bt.23318.1.S2_at,	1	0.921171	83.2005
GOTERM_BP_ALL	GO:0006811~ion transport	18	0.0426	0.262454	Bt.10312.1.A1_at, Bt.3704.2.S1_a_at, Bt.1575.1.S1_at, Bt.5267.1.S1_at, Bt.5415.1.S1_at, Bt.12912.1.S1_at, Bt.12912.1.S2_at, Bt.8124.1.S1_at, Bt.8124.1.S2_at, Bt.3885.1.S1_at, Bt.3885.3.S1_at, Bt.4394.1.S1_at, Bt.23318.1.S1_at, Bt.23318.1.S2_at, Bt.8549.1.S1_at, Bt.28583.1.S1_s_at, Bt.8549.1.S2_at, Bt.11324.1.A1_s_at, Bt.10442.2.A1_at, Bt.4482.2.S1_a_at, Bt.2537.2.S1_at, Bt.4430.1.S2_at, Bt.13122.…	1	0.996849	99.6095
Functional Group 20	Median: 0.010721882112151882	Geo: 0.008376090088221124	Bt.422.1.S2_at, Bt.422.1.S1_at, Bt.12825.1.S1_at, Bt.9973.1.S2_at, Bt.16055.2.S1_a_at, Bt.15556.1.A1_s_at, Bt.15972.1.S1_at, Bt.5472.1.S1_at, Bt.2344.1.S1_at, Bt.1948.1.S1_at,
Category	Term	Count	%	PValue	Genes	Bonferroni	Benjamini	FDR
GOTERM_BP_ALL	GO:0007517~muscle development	7	0.0165	0.00127611	Bt.422.1.S2_at, Bt.422.1.S1_at, Bt.12825.1.S1_at, Bt.9973.1.S2_at, Bt.16055.2.S1_a_at, Bt.15556.1.A1_s_at, Bt.15972.1.S1_at, Bt.5472.1.S1_at,	0.985767	0.136383	2.2992
GOTERM_BP_ALL	GO:0021700~developmental maturation	5	0.0118	0.00455322	Bt.12825.1.S1_at, Bt.2344.1.S1_at, Bt.9973.1.S2_at, Bt.15972.1.S1_at, Bt.1948.1.S1_at,	1	0.286596	7.97691
GOTERM_BP_ALL	GO:0045445~myoblast differentiation	4	0.0095	0.00556019	Bt.422.1.S2_at, Bt.422.1.S1_at, Bt.12825.1.S1_at, Bt.9973.1.S2_at, Bt.5472.1.S1_at,	1	0.320783	9.65794
GOTERM_BP_ALL	GO:0042692~muscle cell differentiation	4	0.0095	0.00706124	Bt.422.1.S2_at, Bt.422.1.S1_at, Bt.12825.1.S1_at, Bt.9973.1.S2_at, Bt.5472.1.S1_at,	1	0.364787	12.11
GOTERM_BP_ALL	GO:0048741~skeletal muscle fiber development	4	0.0095	0.0107219	Bt.422.1.S2_at, Bt.422.1.S1_at, Bt.12825.1.S1_at, Bt.9973.1.S2_at, Bt.5472.1.S1_at,	1	0.444824	17.8287
GOTERM_BP_ALL	GO:0048747~muscle fiber development	4	0.0095	0.0107219	Bt.422.1.S2_at, Bt.422.1.S1_at, Bt.12825.1.S1_at, Bt.9973.1.S2_at, Bt.5472.1.S1_at,	1	0.444824	17.8287
GOTERM_BP_ALL	GO:0014706~striated muscle development	5	0.0118	0.0124403	Bt.422.1.S2_at, Bt.422.1.S1_at, Bt.12825.1.S1_at, Bt.9973.1.S2_at, Bt.15972.1.S1_at, Bt.5472.1.S1_at,	1	0.453459	20.3903
GOTERM_BP_ALL	GO:0048469~cell maturation	4	0.0095	0.0179346	Bt.12825.1.S1_at, Bt.9973.1.S2_at, Bt.15972.1.S1_at, Bt.1948.1.S1_at,	1	0.547492	28.0833
GOTERM_BP_ALL	GO:0007519~skeletal muscle development	4	0.0095	0.034684	Bt.422.1.S2_at, Bt.422.1.S1_at, Bt.12825.1.S1_at, Bt.9973.1.S2_at, Bt.5472.1.S1_at,	1	0.725208	47.4298
Functional Group 21	Median: 0.008854689780929684	Geo: 0.008400223626042659	Bt.3890.1.S1_at, Bt.12112.1.S1_at, Bt.4001.1.S1_at, Bt.15972.1.S1_at, Bt.5472.1.S1_at, Bt.2230.1.S1_at, Bt.3478.1.A1_s_at, Bt.2230.1.S2_at, Bt.14176.2.S1_at, Bt.14176.1.S1_at, Bt.435.1.S1_at, Bt.26612.2.S1_at, Bt.13780.1.A1_at, Bt.3265.1.S1_at, Bt.18631.1.A1_at, Bt.28182.1.A1_at, Bt.28178.1.A1_at, Bt.28616.1.A1_at, Bt.2662.1.A1_at, Bt.5309.1.S1_at, Bt.2344.1.S1_at, Bt.4394.1.S1_at, Bt.4279.1.S1_a…
Category	Term	Count	%	PValue	Genes	Bonferroni	Benjamini	FDR
GOTERM_BP_ALL	GO:0043122~regulation of I-kappaB kinase/NF-kappaB cascade	5	0.0118	0.00131487	Bt.3890.1.S1_at, Bt.12112.1.S1_at, Bt.4001.1.S1_at, Bt.15972.1.S1_at, Bt.5472.1.S1_at,	0.987492	0.135883	2.36825
GOTERM_BP_ALL	GO:0043123~positive regulation of I-kappaB kinase/NF-kappaB cascade	5	0.0118	0.00131487	Bt.3890.1.S1_at, Bt.12112.1.S1_at, Bt.4001.1.S1_at, Bt.15972.1.S1_at, Bt.5472.1.S1_at,	0.987492	0.135883	2.36825
GOTERM_BP_ALL	GO:0007249~I-kappaB kinase/NF-kappaB cascade	5	0.0118	0.0025989	Bt.3890.1.S1_at, Bt.12112.1.S1_at, Bt.4001.1.S1_at, Bt.15972.1.S1_at, Bt.5472.1.S1_at,	0.999828	0.199241	4.62972
GOTERM_BP_ALL	GO:0007243~protein kinase cascade	7	0.0165	0.00885469	Bt.3890.1.S1_at, Bt.12112.1.S1_at, Bt.2230.1.S1_at, Bt.3478.1.A1_s_at, Bt.2230.1.S2_at, Bt.14176.2.S1_at, Bt.14176.1.S1_at, Bt.435.1.S1_at, Bt.4001.1.S1_at, Bt.15972.1.S1_at, Bt.5472.1.S1_at,	1	0.399892	14.9572
GOTERM_BP_ALL	GO:0009966~regulation of signal transduction	13	0.0307	0.0102145	Bt.3890.1.S1_at, Bt.26612.2.S1_at, Bt.14176.2.S1_at, Bt.14176.1.S1_at, Bt.435.1.S1_at, Bt.13780.1.A1_at, Bt.3265.1.S1_at, Bt.18631.1.A1_at, Bt.15972.1.S1_at, Bt.12112.1.S1_at, Bt.2230.1.S1_at, Bt.3478.1.A1_s_at, Bt.2230.1.S2_at, Bt.4001.1.S1_at, Bt.28182.1.A1_at, Bt.28178.1.A1_at, Bt.5472.1.S1_at,	1	0.434373	17.0576
GOTERM_BP_ALL	GO:0009967~positive regulation of signal transduction	5	0.0118	0.0109912	Bt.3890.1.S1_at, Bt.12112.1.S1_at, Bt.4001.1.S1_at, Bt.15972.1.S1_at, Bt.5472.1.S1_at,	1	0.427433	18.2352
GOTERM_BP_ALL	GO:0007242~intracellular signaling cascade	15	0.0355	0.660763	Bt.3890.1.S1_at, Bt.28616.1.A1_at, Bt.14176.2.S1_at, Bt.14176.1.S1_at, Bt.435.1.S1_at, Bt.2662.1.A1_at, Bt.5309.1.S1_at, Bt.3265.1.S1_at, Bt.2344.1.S1_at, Bt.4394.1.S1_at, Bt.15972.1.S1_at, Bt.12112.1.S1_at, Bt.2230.1.S1_at, Bt.3478.1.A1_s_at, Bt.2230.1.S2_at, Bt.4279.1.S1_at, Bt.26265.1.A1_at, Bt.4001.1.S1_at, Bt.4653.1.S2_at, Bt.5472.1.S1_at,	1	1	100
Functional Group 22	Median: 0.010958985508528314	Geo: 0.008937323185654857	Bt.5366.1.S1_at, Bt.4057.1.S1_at, Bt.2017.1.S1_at, Bt.6449.1.S1_at, Bt.22969.1.S1_a_at, Bt.4653.1.S2_at, Bt.15972.1.S1_at, Bt.1345.1.S1_at, Bt.471.1.S1_at, Bt.5021.1.S1_at, Bt.8803.1.A1_at,
Category	Term	Count	%	PValue	Genes	Bonferroni	Benjamini	FDR
GOTERM_BP_ALL	GO:0042060~wound healing	9	0.0213	0.000200774	Bt.5366.1.S1_at, Bt.4057.1.S1_at, Bt.2017.1.S1_at, Bt.6449.1.S1_at, Bt.22969.1.S1_a_at, Bt.4653.1.S2_at, Bt.15972.1.S1_at, Bt.1345.1.S1_at, Bt.471.1.S1_at,	0.487598	0.0313387	0.365098
INTERPRO	IPR013091:EGF calcium-binding	5	0.0118	0.00573748	Bt.5366.1.S1_at, Bt.5021.1.S1_at, Bt.6449.1.S1_at, Bt.8803.1.A1_at, Bt.471.1.S1_at,	1	0.77509	9.96358
GOTERM_BP_ALL	GO:0007596~blood coagulation	6	0.0142	0.010959	Bt.5366.1.S1_at, Bt.2017.1.S1_at, Bt.6449.1.S1_at, Bt.22969.1.S1_a_at, Bt.1345.1.S1_at, Bt.471.1.S1_at,	1	0.43637	18.1867
GOTERM_BP_ALL	GO:0007599~hemostasis	6	0.0142	0.010959	Bt.5366.1.S1_at, Bt.2017.1.S1_at, Bt.6449.1.S1_at, Bt.22969.1.S1_a_at, Bt.1345.1.S1_at, Bt.471.1.S1_at,	1	0.43637	18.1867
GOTERM_BP_ALL	GO:0050817~coagulation	6	0.0142	0.0120537	Bt.5366.1.S1_at, Bt.2017.1.S1_at, Bt.6449.1.S1_at, Bt.22969.1.S1_a_at, Bt.1345.1.S1_at, Bt.471.1.S1_at,	1	0.452681	19.8206
GOTERM_BP_ALL	GO:0050878~regulation of body fluid levels	6	0.0142	0.0144609	Bt.5366.1.S1_at, Bt.2017.1.S1_at, Bt.6449.1.S1_at, Bt.22969.1.S1_a_at, Bt.1345.1.S1_at, Bt.471.1.S1_at,	1	0.49018	23.3056
SP_PIR_KEYWORDS	blood coagulation	4	0.0095	0.188873	Bt.5366.1.S1_at, Bt.2017.1.S1_at, Bt.22969.1.S1_a_at, Bt.471.1.S1_at,	1	0.978645	95.8308
Functional Group 23	Median: 0.03563102777092515	Geo: 0.009718809702528888	Bt.4912.1.S1_at, Bt.12506.1.S1_at, Bt.18822.1.A1_at, Bt.22857.1.S2_at, Bt.14176.2.S1_at, Bt.14176.1.S1_at, Bt.435.1.S1_at, Bt.21322.1.S1_at, Bt.22969.1.S1_a_at, Bt.5229.1.S1_at, Bt.2017.1.S1_at, Bt.2638.1.S1_at, Bt.4507.1.S1_at, Bt.21385.1.S1_at, Bt.5136.1.S1_at, Bt.21835.1.S1_at, Bt.1855.1.S1_at, Bt.3265.1.S1_at, Bt.4757.1.S1_at, Bt.422.1.S2_at, Bt.422.1.S1_at,
Category	Term	Count	%	PValue	Genes	Bonferroni	Benjamini	FDR
GOTERM_MF_ALL	GO:0004857~enzyme inhibitor activity	14	0.0331	0.000295823	Bt.4912.1.S1_at, Bt.12506.1.S1_at, Bt.18822.1.A1_at, Bt.22857.1.S2_at, Bt.14176.2.S1_at, Bt.14176.1.S1_at, Bt.435.1.S1_at, Bt.21322.1.S1_at, Bt.22969.1.S1_a_at, Bt.5229.1.S1_at, Bt.2017.1.S1_at, Bt.2638.1.S1_at, Bt.4507.1.S1_at, Bt.21385.1.S1_at, Bt.5136.1.S1_at, Bt.21835.1.S1_at, Bt.1855.1.S1_at,	0.421521	0.066131	0.50279
GOTERM_MF_ALL	GO:0004866~endopeptidase inhibitor activity	12	0.0284	0.000422316	Bt.4912.1.S1_at, Bt.5229.1.S1_at, Bt.12506.1.S1_at, Bt.2017.1.S1_at, Bt.2638.1.S1_at, Bt.14176.2.S1_at, Bt.14176.1.S1_at, Bt.435.1.S1_at, Bt.4507.1.S1_at, Bt.21385.1.S1_at, Bt.22969.1.S1_a_at, Bt.21322.1.S1_at, Bt.5136.1.S1_at, Bt.1855.1.S1_at,	0.542258	0.0630457	0.717055
GOTERM_MF_ALL	GO:0030414~protease inhibitor activity	12	0.0284	0.000829693	Bt.4912.1.S1_at, Bt.5229.1.S1_at, Bt.12506.1.S1_at, Bt.2017.1.S1_at, Bt.2638.1.S1_at, Bt.14176.2.S1_at, Bt.14176.1.S1_at, Bt.435.1.S1_at, Bt.4507.1.S1_at, Bt.21385.1.S1_at, Bt.22969.1.S1_a_at, Bt.21322.1.S1_at, Bt.5136.1.S1_at, Bt.1855.1.S1_at,	0.784667	0.111411	1.40416
GOTERM_MF_ALL	GO:0030234~enzyme regulator activity	17	0.0402	0.035631	Bt.4912.1.S1_at, Bt.12506.1.S1_at, Bt.18822.1.A1_at, Bt.22857.1.S2_at, Bt.14176.2.S1_at, Bt.14176.1.S1_at, Bt.435.1.S1_at, Bt.3265.1.S1_at, Bt.22969.1.S1_a_at, Bt.21322.1.S1_at, Bt.4757.1.S1_at, Bt.5229.1.S1_at, Bt.2017.1.S1_at, Bt.2638.1.S1_at, Bt.422.1.S2_at, Bt.422.1.S1_at, Bt.4507.1.S1_at, Bt.21385.1.S1_at, Bt.5136.1.S1_at, Bt.21835.1.S1_at, Bt.1855.1.S1_at,	1	0.931766	46.1039
GOTERM_MF_ALL	GO:0004867~serine-type endopeptidase inhibitor activity	6	0.0142	0.0592585	Bt.5229.1.S1_at, Bt.12506.1.S1_at, Bt.2017.1.S1_at, Bt.2638.1.S1_at, Bt.21385.1.S1_at, Bt.22969.1.S1_a_at,	1	0.970741	64.6798
SP_PIR_KEYWORDS	protease inhibitor	5	0.0118	0.101745	Bt.4912.1.S1_at, Bt.5229.1.S1_at, Bt.2017.1.S1_at, Bt.22969.1.S1_a_at, Bt.1855.1.S1_at,	1	0.914955	80.3823
SP_PIR_KEYWORDS	Serine protease inhibitor	3	0.0071	0.367801	Bt.5229.1.S1_at, Bt.2017.1.S1_at, Bt.22969.1.S1_a_at,	1	0.998818	99.9051
Functional Group 24	Median: 0.014247760497320777	Geo: 0.014328195443234352	Bt.23218.1.S1_at, Bt.7938.1.S1_at, Bt.1031.1.S1_at, Bt.17926.1.A1_at, Bt.9931.1.S1_at, Bt.16018.1.S2_at, Bt.4740.1.S1_at, Bt.16380.2.A1_at, Bt.287.1.S1_at, Bt.15972.1.S1_at, Bt.5366.1.S1_at, Bt.7046.1.S1_at, Bt.12302.1.S1_at, Bt.5313.1.S1_at, Bt.5408.1.A1_at,
Category	Term	Count	%	PValue	Genes	Bonferroni	Benjamini	FDR
PIR_SUPERFAMILY	PIRSF001182:papain	4	0.0095	0.00241591	Bt.23218.1.S1_at, Bt.7938.1.S1_at, Bt.1031.1.S1_at, Bt.17926.1.A1_at,	0.968461	0.968461	3.91665
SP_PIR_KEYWORDS	thiol protease	6	0.0142	0.0028873	Bt.23218.1.S1_at, Bt.9931.1.S1_at, Bt.16018.1.S2_at, Bt.7938.1.S1_at, Bt.1031.1.S1_at, Bt.17926.1.A1_at,	0.880595	0.233296	4.29407
GOTERM_CC_ALL	GO:0005764~lysosome	8	0.0189	0.00658677	Bt.23218.1.S1_at, Bt.7938.1.S1_at, Bt.1031.1.S1_at, Bt.4740.1.S1_at, Bt.16380.2.A1_at, Bt.17926.1.A1_at, Bt.287.1.S1_at, Bt.15972.1.S1_at,	0.975296	0.21864	9.2155
GOTERM_CC_ALL	GO:0000323~lytic vacuole	8	0.0189	0.00658677	Bt.23218.1.S1_at, Bt.7938.1.S1_at, Bt.1031.1.S1_at, Bt.4740.1.S1_at, Bt.16380.2.A1_at, Bt.17926.1.A1_at, Bt.287.1.S1_at, Bt.15972.1.S1_at,	0.975296	0.21864	9.2155
INTERPRO	IPR000668:Peptidase C1A, papain C-terminal	4	0.0095	0.00935841	Bt.23218.1.S1_at, Bt.7938.1.S1_at, Bt.1031.1.S1_at, Bt.17926.1.A1_at,	1	0.879131	15.7605
SMART	SM00645:Pept_C1	4	0.0095	0.0115028	Bt.23218.1.S1_at, Bt.7938.1.S1_at, Bt.1031.1.S1_at, Bt.17926.1.A1_at,	0.99678	0.61573	15.3307
INTERPRO	IPR013128:Peptidase C1A, papain	4	0.0095	0.0134263	Bt.23218.1.S1_at, Bt.7938.1.S1_at, Bt.1031.1.S1_at, Bt.17926.1.A1_at,	1	0.909122	21.8516
GOTERM_CC_ALL	GO:0005773~vacuole	8	0.0189	0.0150692	Bt.23218.1.S1_at, Bt.7938.1.S1_at, Bt.1031.1.S1_at, Bt.4740.1.S1_at, Bt.16380.2.A1_at, Bt.17926.1.A1_at, Bt.287.1.S1_at, Bt.15972.1.S1_at,	0.999797	0.360793	19.9195
INTERPRO	IPR013201:Proteinase inhibitor I29, cathepsin propeptide	3	0.0071	0.0195844	Bt.23218.1.S1_at, Bt.7938.1.S1_at, Bt.1031.1.S1_at,	1	0.951715	30.2863
SP_PIR_KEYWORDS	Zymogen	9	0.0213	0.0326863	Bt.5366.1.S1_at, Bt.23218.1.S1_at, Bt.16018.1.S2_at, Bt.7046.1.S1_at, Bt.12302.1.S1_at, Bt.7938.1.S1_at, Bt.5313.1.S1_at, Bt.1031.1.S1_at, Bt.17926.1.A1_at,	1	0.803755	39.6156
SP_PIR_KEYWORDS	lysosome	6	0.0142	0.0350563	Bt.23218.1.S1_at, Bt.7938.1.S1_at, Bt.1031.1.S1_at, Bt.4740.1.S1_at, Bt.17926.1.A1_at, Bt.287.1.S1_at,	1	0.805885	41.8226
GOTERM_MF_ALL	GO:0008234~cysteine-type peptidase activity	7	0.0165	0.0426664	Bt.23218.1.S1_at, Bt.9931.1.S1_at, Bt.16018.1.S2_at, Bt.7938.1.S1_at, Bt.1031.1.S1_at, Bt.17926.1.A1_at, Bt.5408.1.A1_at,	1	0.949594	52.4247
INTERPRO	IPR000169:Peptidase, cysteine peptidase active site	4	0.0095	0.046669	Bt.23218.1.S1_at, Bt.7938.1.S1_at, Bt.1031.1.S1_at, Bt.17926.1.A1_at,	1	0.988613	58.179
GOTERM_MF_ALL	GO:0004197~cysteine-type endopeptidase activity	5	0.0118	0.0521858	Bt.23218.1.S1_at, Bt.16018.1.S2_at, Bt.7938.1.S1_at, Bt.1031.1.S1_at, Bt.17926.1.A1_at,	1	0.959177	59.8726
Functional Group 25	Median: 0.036593738900830855	Geo: 0.014442799090354723	Bt.14176.2.S1_at, Bt.14176.1.S1_at, Bt.435.1.S1_at, Bt.13039.1.A1_at, Bt.13039.1.S1_at, Bt.5398.1.S1_at, Bt.15707.1.S1_at, Bt.27462.1.S1_a_at, Bt.9973.1.S2_at, Bt.8140.1.S1_at, Bt.5536.1.S1_at, Bt.5021.1.S1_at, Bt.4390.1.S1_at, Bt.29890.1.S1_at, Bt.5223.1.S1_at, Bt.24208.1.S1_at, Bt.8124.1.S1_at, Bt.8124.1.S2_at, Bt.8549.1.S1_at, Bt.28583.1.S1_s_at, Bt.8549.1.S2_at,
Category	Term	Count	%	PValue	Genes	Bonferroni	Benjamini	FDR
GOTERM_MF_ALL	GO:0005178~integrin binding	5	0.0118	0.000146267	Bt.14176.2.S1_at, Bt.14176.1.S1_at, Bt.435.1.S1_at, Bt.13039.1.A1_at, Bt.13039.1.S1_at, Bt.5398.1.S1_at, Bt.15707.1.S1_at, Bt.27462.1.S1_a_at, Bt.9973.1.S2_at,	0.237089	0.0379214	0.248898
GOTERM_MF_ALL	GO:0032403~protein complex binding	6	0.0142	0.00041217	Bt.14176.2.S1_at, Bt.14176.1.S1_at, Bt.435.1.S1_at, Bt.13039.1.A1_at, Bt.13039.1.S1_at, Bt.5398.1.S1_at, Bt.15707.1.S1_at, Bt.27462.1.S1_a_at, Bt.9973.1.S2_at, Bt.8140.1.S1_at,	0.533581	0.0734314	0.699885
INTERPRO	IPR013111:EGF, extracellular	7	0.0165	0.000426671	Bt.5536.1.S1_at, Bt.5021.1.S1_at, Bt.4390.1.S1_at, Bt.5398.1.S1_at, Bt.9973.1.S2_at, Bt.29890.1.S1_at, Bt.5223.1.S1_at,	0.762744	0.250031	0.775414
KEGG_PATHWAY	bta04512:ECM-receptor interaction	8	0.0189	0.00543151	Bt.5536.1.S1_at, Bt.24208.1.S1_at, Bt.8124.1.S1_at, Bt.8124.1.S2_at, Bt.13039.1.A1_at, Bt.13039.1.S1_at, Bt.5398.1.S1_at, Bt.15707.1.S1_at, Bt.27462.1.S1_a_at, Bt.9973.1.S2_at, Bt.8549.1.S1_at, Bt.28583.1.S1_s_at, Bt.8549.1.S2_at,	0.634894	0.222671	6.51711
GOTERM_BP_ALL	GO:0007160~cell-matrix adhesion	4	0.0095	0.0179346	Bt.5536.1.S1_at, Bt.4390.1.S1_at, Bt.13039.1.A1_at, Bt.13039.1.S1_at, Bt.9973.1.S2_at,	1	0.547492	28.0833
GOTERM_BP_ALL	GO:0031589~cell-substrate adhesion	4	0.0095	0.02081	Bt.5536.1.S1_at, Bt.4390.1.S1_at, Bt.13039.1.A1_at, Bt.13039.1.S1_at, Bt.9973.1.S2_at,	1	0.592536	31.8239
GOTERM_BP_ALL	GO:0007229~integrin-mediated signaling pathway	4	0.0095	0.0272739	Bt.5536.1.S1_at, Bt.13039.1.A1_at, Bt.13039.1.S1_at, Bt.15707.1.S1_at, Bt.27462.1.S1_a_at, Bt.9973.1.S2_at,	1	0.653001	39.5723
PIR_SUPERFAMILY	PIRSF002512:integrin, beta subunit	3	0.0071	0.0365937	Bt.5536.1.S1_at, Bt.13039.1.A1_at, Bt.13039.1.S1_at, Bt.9973.1.S2_at,	1	1	45.9785
INTERPRO	IPR015812:Integrin beta subunit	3	0.0071	0.0452219	Bt.5536.1.S1_at, Bt.13039.1.A1_at, Bt.13039.1.S1_at, Bt.9973.1.S2_at,	1	0.991149	57.0057
INTERPRO	IPR002369:Integrin beta subunit, N-terminal	3	0.0071	0.0452219	Bt.5536.1.S1_at, Bt.13039.1.A1_at, Bt.13039.1.S1_at, Bt.9973.1.S2_at,	1	0.991149	57.0057
INTERPRO	IPR001169:Integrin beta subunit, C-terminal	3	0.0071	0.0452219	Bt.5536.1.S1_at, Bt.13039.1.A1_at, Bt.13039.1.S1_at, Bt.9973.1.S2_at,	1	0.991149	57.0057
SMART	SM00187:INB	3	0.0071	0.051926	Bt.5536.1.S1_at, Bt.13039.1.A1_at, Bt.13039.1.S1_at, Bt.9973.1.S2_at,	1	0.828505	53.5597
GOTERM_CC_ALL	GO:0008305~integrin complex	3	0.0071	0.0617917	Bt.5536.1.S1_at, Bt.13039.1.A1_at, Bt.13039.1.S1_at, Bt.9973.1.S2_at,	1	0.695968	60.6681
SP_PIR_KEYWORDS	Integrin	4	0.0095	0.0717248	Bt.5536.1.S1_at, Bt.13039.1.A1_at, Bt.13039.1.S1_at, Bt.15707.1.S1_at, Bt.27462.1.S1_a_at, Bt.9973.1.S2_at,	1	0.887876	67.6881
GOTERM_CC_ALL	GO:0043235~receptor complex	3	0.0071	0.224071	Bt.5536.1.S1_at, Bt.13039.1.A1_at, Bt.13039.1.S1_at, Bt.9973.1.S2_at,	1	0.9785	97.5559
Functional Group 26	Median: 0.016972847723156544	Geo: 0.014575255515392732	Bt.350.1.S1_at, Bt.350.1.S1_x_at, Bt.2314.1.S1_at, Bt.9217.1.A1_at, Bt.350.1.S1_x_at, Bt.350.1.S1_at, Bt.15972.1.S1_at, Bt.12112.1.S1_at, Bt.2230.1.S1_at, Bt.3478.1.A1_s_at, Bt.2230.1.S2_at, Bt.13039.1.A1_at, Bt.13039.1.S1_at, Bt.16380.2.A1_at, Bt.4653.1.S2_at, Bt.29772.1.A1_at, Bt.15990.1.S1_at, Bt.29772.1.S1_at, Bt.4520.1.S1_at, Bt.2988.1.S1_at, Bt.2662.1.A1_at, Bt.5309.1.S1_at, Bt.13989.3.S1_a…
Category	Term	Count	%	PValue	Genes	Bonferroni	Benjamini	FDR
GOTERM_CC_ALL	GO:0044459~plasma membrane part	26	0.0615	0.0101523	Bt.350.1.S1_at, Bt.350.1.S1_x_at, Bt.2314.1.S1_at, Bt.9217.1.A1_at, Bt.350.1.S1_x_at, Bt.350.1.S1_at, Bt.15972.1.S1_at, Bt.12112.1.S1_at, Bt.2230.1.S1_at, Bt.3478.1.A1_s_at, Bt.2230.1.S2_at, Bt.13039.1.A1_at, Bt.13039.1.S1_at, Bt.16380.2.A1_at, Bt.4653.1.S2_at, Bt.29772.1.A1_at, Bt.15990.1.S1_at, Bt.29772.1.S1_at, Bt.4520.1.S1_at, Bt.2988.1.S1_at, Bt.2662.1.A1_at, Bt.5309.1.S1_at, Bt.13989.3.S1_a…	0.996702	0.285475	13.8676
GOTERM_CC_ALL	GO:0005887~integral to plasma membrane	9	0.0213	0.0169728	Bt.5536.1.S1_at, Bt.2230.1.S1_at, Bt.3478.1.A1_s_at, Bt.2230.1.S2_at, Bt.4520.1.S1_at, Bt.13989.3.S1_at, Bt.13989.1.A1_at, Bt.13039.1.A1_at, Bt.13039.1.S1_at, Bt.2344.1.S1_at, Bt.9973.1.S2_at, Bt.16380.2.A1_at, Bt.8140.1.S1_at,	0.999931	0.366499	22.1542
GOTERM_CC_ALL	GO:0031226~intrinsic to plasma membrane	9	0.0213	0.0179693	Bt.5536.1.S1_at, Bt.2230.1.S1_at, Bt.3478.1.A1_s_at, Bt.2230.1.S2_at, Bt.4520.1.S1_at, Bt.13989.3.S1_at, Bt.13989.1.A1_at, Bt.13039.1.A1_at, Bt.13039.1.S1_at, Bt.2344.1.S1_at, Bt.9973.1.S2_at, Bt.16380.2.A1_at, Bt.8140.1.S1_at,	0.999961	0.3697	23.3006
Functional Group 27	Median: 0.018347698384333724	Geo: 0.01566860464096052	Bt.137.1.S1_at, Bt.5398.1.S1_at, Bt.3046.1.S1_at, Bt.13204.1.S1_at,
Category	Term	Count	%	PValue	Genes	Bonferroni	Benjamini	FDR
INTERPRO	IPR014716:Fibrinogen, alpha/beta/gamma chain, C-terminal globular, subdomain 1	4	0.0095	0.00935841	Bt.137.1.S1_at, Bt.5398.1.S1_at, Bt.3046.1.S1_at, Bt.13204.1.S1_at,	1	0.879131	15.7605
INTERPRO	IPR002181:Fibrinogen, alpha/beta/gamma chain, C-terminal globular	4	0.0095	0.0183477	Bt.137.1.S1_at, Bt.5398.1.S1_at, Bt.3046.1.S1_at, Bt.13204.1.S1_at,	1	0.955897	28.6648
SMART	SM00186:FBG	4	0.0095	0.0224031	Bt.137.1.S1_at, Bt.5398.1.S1_at, Bt.3046.1.S1_at, Bt.13204.1.S1_at,	0.999987	0.799205	27.8132
Functional Group 28	Median: 0.02376768377284029	Geo: 0.023764983964429977	Bt.2230.1.S1_at, Bt.3478.1.A1_s_at, Bt.2230.1.S2_at, Bt.22002.1.S1_at, Bt.97.1.S1_at, Bt.6446.1.S1_at, Bt.21835.1.S1_at, Bt.2415.1.S1_at, Bt.18822.1.A1_at, Bt.22857.1.S2_at, Bt.2344.1.S1_at, Bt.5092.3.S1_at, Bt.5092.1.S1_at, Bt.5230.1.S1_at, Bt.17926.1.A1_at,
Category	Term	Count	%	PValue	Genes	Bonferroni	Benjamini	FDR
GOTERM_BP_ALL	GO:0051348~negative regulation of transferase activity	4	0.0095	0.00877971	Bt.2230.1.S1_at, Bt.3478.1.A1_s_at, Bt.2230.1.S2_at, Bt.22002.1.S1_at, Bt.97.1.S1_at, Bt.6446.1.S1_at, Bt.21835.1.S1_at,	1	0.413697	14.8399
GOTERM_BP_ALL	GO:0006469~negative regulation of protein kinase activity	4	0.0095	0.00877971	Bt.2230.1.S1_at, Bt.3478.1.A1_s_at, Bt.2230.1.S2_at, Bt.22002.1.S1_at, Bt.97.1.S1_at, Bt.6446.1.S1_at, Bt.21835.1.S1_at,	1	0.413697	14.8399
GOTERM_BP_ALL	GO:0033673~negative regulation of kinase activity	4	0.0095	0.00877971	Bt.2230.1.S1_at, Bt.3478.1.A1_s_at, Bt.2230.1.S2_at, Bt.22002.1.S1_at, Bt.97.1.S1_at, Bt.6446.1.S1_at, Bt.21835.1.S1_at,	1	0.413697	14.8399
GOTERM_BP_ALL	GO:0043086~negative regulation of catalytic activity	4	0.0095	0.0128927	Bt.2230.1.S1_at, Bt.3478.1.A1_s_at, Bt.2230.1.S2_at, Bt.22002.1.S1_at, Bt.97.1.S1_at, Bt.6446.1.S1_at, Bt.21835.1.S1_at,	1	0.460609	21.052
GOTERM_BP_ALL	GO:0065009~regulation of a molecular function	10	0.0236	0.0237677	Bt.2230.1.S1_at, Bt.3478.1.A1_s_at, Bt.2230.1.S2_at, Bt.22002.1.S1_at, Bt.97.1.S1_at, Bt.2415.1.S1_at, Bt.18822.1.A1_at, Bt.22857.1.S2_at, Bt.6446.1.S1_at, Bt.2344.1.S1_at, Bt.5092.3.S1_at, Bt.5092.1.S1_at, Bt.21835.1.S1_at, Bt.5230.1.S1_at, Bt.17926.1.A1_at,	1	0.63259	35.479
[truncated: 569 more rows]

## Sheet: C
Worksheet C. IPA generated epithelial network 1
[truncated: 37 more rows]

## Sheet: D
Worksheet D. IPA generated epithelial network 2
[truncated: 38 more rows]

[truncated: 13 more sheets: E, F, G, H, I, J, K, L, M, N, O, P, Q]
